# Supplementary material for: The Failure of the Tacoma Narrows Bridge
Source: PeerJ journal article supplement (doi:10.7717/peerj.10223), 1941-03-28
Supplement: Supplemental_Files.zip [file Supplemental_Files.zip]

## Sheet: Pupa VS Female
Supplementary Table. S5: GO enrichment list of differential genes between Pupa and Female Adults
NOTE: GO_accession:ID of the GO node; Description:Description of GO; Term_type:Categories for GO; Over_represented_pValue:Pvalue for enrichment analysis; Corrected_pValue:Corrected Pvalue; DEG_item:Entry of differential genes related to this GO; DEG_list: GO annotated number of differential genes; Bg_item:Entries for background (all) genes related to this GO; Bg_list:Number of background (all) ge…
GO_accession	Description	Term_type	Over_represented_pValue	Corrected_pValue	DEG_item	DEG_list	Bg_item	Bg_list	up	Up_Gene_names	Down	Down_Gene_names
GO:0006030	chitin metabolic process	biological_process	4.1947e-10	5.905e-07	39	3203	118	27707	7	i0_HQ_Rweevil_c12327/f4p0/876,i1_LQ_Rweevil_c36647/f1p5/1091,i2_LQ_Rweevil_c65537/f1p11/2727,i3_LQ_Rweevil_c10260/f1p3/3245,i1_LQ_Rweevil_c82662/f1p3/1716,i2_LQ_Rweevil_c34747/f2p9/2361,i1_HQ_Rweevil_c14225/f2p0/1191	32	i1_LQ_Rweevil_c47457/f1p6/1764,i2_LQ_Rweevil_c56738/f1p1/2224,i2_LQ_Rweevil_c3193/f1p16/2518,i5_HQ_Rweevil_c5257/f10p6/5537,i9_LQ_Rweevil_c112/f1p0/9092,i5_LQ_Rweevil_c3151/f1p0/5163,i2_LQ_Rweevil_c82070/f1p22/2201,i3_LQ_Rweevil_c22723/f1p0/3029,i4_LQ_Rweevil_c4272/f1p0/4349,i4_LQ_Rweevil_c2344/f1p1/4974,i1_HQ_Rweevil_c18127/f3p9/1760,i2_LQ_Rweevil_c135543/f1p8/2531,i9_LQ_Rweevil_c251/f1p0/9170,i…
GO:1901071	glucosamine-containing compound metabolic process	biological_process	4.1947e-10	5.905e-07	39	3203	118	27707	7	i1_LQ_Rweevil_c36647/f1p5/1091,i0_HQ_Rweevil_c12327/f4p0/876,i3_LQ_Rweevil_c10260/f1p3/3245,i1_LQ_Rweevil_c82662/f1p3/1716,i2_LQ_Rweevil_c65537/f1p11/2727,i1_HQ_Rweevil_c14225/f2p0/1191,i2_LQ_Rweevil_c34747/f2p9/2361	32	i9_LQ_Rweevil_c112/f1p0/9092,i5_LQ_Rweevil_c3151/f1p0/5163,i2_LQ_Rweevil_c82070/f1p22/2201,i1_LQ_Rweevil_c47457/f1p6/1764,i2_LQ_Rweevil_c56738/f1p1/2224,i5_HQ_Rweevil_c5257/f10p6/5537,i2_LQ_Rweevil_c3193/f1p16/2518,i1_HQ_Rweevil_c18127/f3p9/1760,i4_LQ_Rweevil_c2344/f1p1/4974,i2_LQ_Rweevil_c135543/f1p8/2531,i3_LQ_Rweevil_c22723/f1p0/3029,i4_LQ_Rweevil_c4272/f1p0/4349,i2_HQ_Rweevil_c118279/f2p23/20…
GO:0016491	oxidoreductase activity	molecular_function	4.3976e-10	5.905e-07	292	3203	1823	27707	204	i3_HQ_Rweevil_c24006/f2p1/3186,i1_LQ_Rweevil_c8754/f1p0/1885,i1_LQ_Rweevil_c76119/f1p0/1602,i3_LQ_Rweevil_c6668/f1p0/3161,i4_LQ_Rweevil_c3157/f1p0/4835,i2_LQ_Rweevil_c44642/f1p1/2721,i2_LQ_Rweevil_c25225/f1p8/2143,i2_LQ_Rweevil_c5466/f1p4/2461,i2_LQ_Rweevil_c55224/f1p4/2604,i4_LQ_Rweevil_c10766/f1p0/4817,i1_LQ_Rweevil_c145427/f1p0/1018,i3_LQ_Rweevil_c3972/f1p1/3084,i2_LQ_Rweevil_c84611/f1p6/2797,…	88	i1_LQ_Rweevil_c56388/f1p0/1048,i2_LQ_Rweevil_c108717/f1p1/2292,i0_LQ_Rweevil_c880/f12p0/931,i4_LQ_Rweevil_c7929/f1p12/4245,i1_LQ_Rweevil_c12653/f1p0/1486,i2_HQ_Rweevil_c32609/f42p3/2072,i2_HQ_Rweevil_c12174/f3p38/2661,i4_LQ_Rweevil_c3352/f1p0/4367,i2_LQ_Rweevil_c108541/f1p3/2730,i1_LQ_Rweevil_c77730/f1p11/1809,i2_LQ_Rweevil_c94325/f1p13/1969,i3_LQ_Rweevil_c25589/f1p0/3141,i2_LQ_Rweevil_c64403/f1p…
GO:0055114	oxidation-reduction process	biological_process	5.6359e-10	5.905e-07	287	3203	1787	27707	200	i2_LQ_Rweevil_c125556/f1p10/2091,i2_LQ_Rweevil_c131920/f1p16/2688,i2_LQ_Rweevil_c38847/f1p23/2427,i8_LQ_Rweevil_c424/f1p0/8414,i2_LQ_Rweevil_c105435/f1p36/2773,i2_LQ_Rweevil_c112919/f1p4/2752,i7_LQ_Rweevil_c565/f1p0/7239,i0_LQ_Rweevil_c33680/f1p0/515,i5_LQ_Rweevil_c1669/f1p0/5749,i3_LQ_Rweevil_c23226/f1p0/3675,i1_HQ_Rweevil_c28518/f2p0/1162,i2_HQ_Rweevil_c81693/f2p26/2254,i2_LQ_Rweevil_c20838/f1p…	87	i7_LQ_Rweevil_c453/f1p0/7423,i2_LQ_Rweevil_c42540/f1p4/2402,i2_LQ_Rweevil_c77272/f1p3/2480,i2_LQ_Rweevil_c82759/f1p10/2281,i3_LQ_Rweevil_c28594/f1p0/3183,i1_HQ_Rweevil_c32966/f2p0/1096,i3_LQ_Rweevil_c20436/f1p0/3700,i1_LQ_Rweevil_c147953/f1p13/1002,i3_HQ_Rweevil_c1440/f7p0/3196,i2_LQ_Rweevil_c132564/f1p2/2835,i2_LQ_Rweevil_c26312/f1p8/2200,i1_LQ_Rweevil_c26791/f1p17/1803,i1_LQ_Rweevil_c6276/f1p0/…
GO:0008061	chitin binding	molecular_function	7.6848e-10	6.4414e-07	39	3203	120	27707	7	i2_LQ_Rweevil_c34747/f2p9/2361,i1_HQ_Rweevil_c14225/f2p0/1191,i2_LQ_Rweevil_c65537/f1p11/2727,i1_LQ_Rweevil_c82662/f1p3/1716,i3_LQ_Rweevil_c10260/f1p3/3245,i0_HQ_Rweevil_c12327/f4p0/876,i1_LQ_Rweevil_c36647/f1p5/1091	32	i1_LQ_Rweevil_c24984/f1p21/1296,i4_LQ_Rweevil_c6590/f1p2/4115,i8_LQ_Rweevil_c250/f1p0/8927,i1_HQ_Rweevil_c1412/f14p0/1402,i2_LQ_Rweevil_c22586/f1p38/2265,i8_LQ_Rweevil_c220/f1p0/8868,i1_HQ_Rweevil_c1422/f7p0/1794,i2_LQ_Rweevil_c69232/f1p38/2134,i3_LQ_Rweevil_c6698/f1p23/3444,i9_LQ_Rweevil_c317/f1p0/9013,i2_LQ_Rweevil_c106373/f1p10/2198,i2_LQ_Rweevil_c11842/f1p1/2342,i2_LQ_Rweevil_c61639/f1p1/2456…
GO:0006040	amino sugar metabolic process	biological_process	1.0598e-09	7.4027e-07	40	3203	126	27707	7	i1_LQ_Rweevil_c36647/f1p5/1091,i0_HQ_Rweevil_c12327/f4p0/876,i1_HQ_Rweevil_c14225/f2p0/1191,i2_LQ_Rweevil_c34747/f2p9/2361,i3_LQ_Rweevil_c10260/f1p3/3245,i1_LQ_Rweevil_c82662/f1p3/1716,i2_LQ_Rweevil_c65537/f1p11/2727	33	i1_HQ_Rweevil_c18127/f3p9/1760,i4_LQ_Rweevil_c2344/f1p1/4974,i2_LQ_Rweevil_c135543/f1p8/2531,i3_LQ_Rweevil_c22723/f1p0/3029,i2_HQ_Rweevil_c73820/f17p1/2269,i4_LQ_Rweevil_c4272/f1p0/4349,i9_LQ_Rweevil_c112/f1p0/9092,i5_LQ_Rweevil_c3151/f1p0/5163,i2_LQ_Rweevil_c82070/f1p22/2201,i1_LQ_Rweevil_c47457/f1p6/1764,i5_HQ_Rweevil_c5257/f10p6/5537,i2_LQ_Rweevil_c3193/f1p16/2518,i2_LQ_Rweevil_c56738/f1p1/222…
GO:0005861	troponin complex	cellular_component	1.5268e-08	4.9223e-06	26	3203	70	27707	24	i1_LQ_Rweevil_c27631/f1p0/1996,i2_HQ_Rweevil_c139476/f2p77/2061,i2_LQ_Rweevil_c83278/f1p42/2770,i1_LQ_Rweevil_c47440/f1p0/1243,i1_LQ_Rweevil_c9820/f1p2/1875,i1_HQ_Rweevil_c14014/f8p0/1756,i1_HQ_Rweevil_c121978/f2p0/1350,i1_HQ_Rweevil_c120332/f6p0/1806,i2_LQ_Rweevil_c37841/f1p74/2754,i3_LQ_Rweevil_c18995/f1p0/3181,i7_LQ_Rweevil_c228/f1p0/7364,i2_LQ_Rweevil_c57464/f1p25/2964,i0_LQ_Rweevil_c6640/f1p…	2	i1_LQ_Rweevil_c5052/f1p0/1620,i1_HQ_Rweevil_c557/f31p0/1437
GO:0005865	striated muscle thin filament	cellular_component	1.5268e-08	4.9223e-06	26	3203	70	27707	24	i1_LQ_Rweevil_c27631/f1p0/1996,i2_HQ_Rweevil_c139476/f2p77/2061,i2_LQ_Rweevil_c83278/f1p42/2770,i1_LQ_Rweevil_c47440/f1p0/1243,i1_HQ_Rweevil_c14014/f8p0/1756,i1_LQ_Rweevil_c9820/f1p2/1875,i1_HQ_Rweevil_c121978/f2p0/1350,i2_LQ_Rweevil_c37841/f1p74/2754,i1_HQ_Rweevil_c120332/f6p0/1806,i3_LQ_Rweevil_c18995/f1p0/3181,i7_LQ_Rweevil_c228/f1p0/7364,i2_LQ_Rweevil_c57464/f1p25/2964,i1_LQ_Rweevil_c41303/f1…	2	i1_LQ_Rweevil_c5052/f1p0/1620,i1_HQ_Rweevil_c557/f31p0/1437
GO:0030016	myofibril	cellular_component	1.5268e-08	4.9223e-06	26	3203	70	27707	24	i3_LQ_Rweevil_c27148/f1p0/3652,i3_LQ_Rweevil_c4186/f1p0/3292,i0_LQ_Rweevil_c14918/f1p0/900,i1_HQ_Rweevil_c120578/f13p0/1823,i1_LQ_Rweevil_c67874/f1p0/1811,i1_LQ_Rweevil_c20578/f1p0/1306,i3_LQ_Rweevil_c17988/f1p29/3355,i7_LQ_Rweevil_c228/f1p0/7364,i1_LQ_Rweevil_c41303/f1p0/1531,i0_LQ_Rweevil_c6640/f1p3/886,i2_LQ_Rweevil_c57464/f1p25/2964,i1_LQ_Rweevil_c68573/f1p4/1167,i7_LQ_Rweevil_c645/f1p0/7459,…	2	i1_HQ_Rweevil_c557/f31p0/1437,i1_LQ_Rweevil_c5052/f1p0/1620
GO:0030017	sarcomere	cellular_component	1.5268e-08	4.9223e-06	26	3203	70	27707	24	i1_LQ_Rweevil_c41303/f1p0/1531,i0_LQ_Rweevil_c6640/f1p3/886,i2_LQ_Rweevil_c57464/f1p25/2964,i7_LQ_Rweevil_c228/f1p0/7364,i4_LQ_Rweevil_c10172/f1p0/4346,i7_LQ_Rweevil_c645/f1p0/7459,i1_LQ_Rweevil_c68573/f1p4/1167,i0_LQ_Rweevil_c14918/f1p0/900,i1_HQ_Rweevil_c120578/f13p0/1823,i3_LQ_Rweevil_c27148/f1p0/3652,i3_LQ_Rweevil_c4186/f1p0/3292,i3_LQ_Rweevil_c17988/f1p29/3355,i1_LQ_Rweevil_c67874/f1p0/1811,…	2	i1_HQ_Rweevil_c557/f31p0/1437,i1_LQ_Rweevil_c5052/f1p0/1620
GO:0036379	myofilament	cellular_component	1.5268e-08	4.9223e-06	26	3203	70	27707	24	i3_LQ_Rweevil_c17988/f1p29/3355,i1_LQ_Rweevil_c67874/f1p0/1811,i1_LQ_Rweevil_c20578/f1p0/1306,i0_LQ_Rweevil_c14918/f1p0/900,i1_HQ_Rweevil_c120578/f13p0/1823,i3_LQ_Rweevil_c27148/f1p0/3652,i3_LQ_Rweevil_c4186/f1p0/3292,i7_LQ_Rweevil_c645/f1p0/7459,i4_LQ_Rweevil_c10172/f1p0/4346,i1_LQ_Rweevil_c68573/f1p4/1167,i0_LQ_Rweevil_c6640/f1p3/886,i1_LQ_Rweevil_c41303/f1p0/1531,i2_LQ_Rweevil_c57464/f1p25/296…	2	i1_HQ_Rweevil_c557/f31p0/1437,i1_LQ_Rweevil_c5052/f1p0/1620
GO:0043292	contractile fiber	cellular_component	1.5268e-08	4.9223e-06	26	3203	70	27707	24	i0_LQ_Rweevil_c14918/f1p0/900,i1_HQ_Rweevil_c120578/f13p0/1823,i3_LQ_Rweevil_c27148/f1p0/3652,i3_LQ_Rweevil_c4186/f1p0/3292,i3_LQ_Rweevil_c17988/f1p29/3355,i1_LQ_Rweevil_c67874/f1p0/1811,i1_LQ_Rweevil_c20578/f1p0/1306,i1_LQ_Rweevil_c41303/f1p0/1531,i0_LQ_Rweevil_c6640/f1p3/886,i2_LQ_Rweevil_c57464/f1p25/2964,i7_LQ_Rweevil_c228/f1p0/7364,i7_LQ_Rweevil_c645/f1p0/7459,i4_LQ_Rweevil_c10172/f1p0/4346,…	2	i1_HQ_Rweevil_c557/f31p0/1437,i1_LQ_Rweevil_c5052/f1p0/1620
GO:0044449	contractile fiber part	cellular_component	1.5268e-08	4.9223e-06	26	3203	70	27707	24	i3_LQ_Rweevil_c4186/f1p0/3292,i3_LQ_Rweevil_c27148/f1p0/3652,i0_LQ_Rweevil_c14918/f1p0/900,i1_HQ_Rweevil_c120578/f13p0/1823,i1_LQ_Rweevil_c20578/f1p0/1306,i1_LQ_Rweevil_c67874/f1p0/1811,i3_LQ_Rweevil_c17988/f1p29/3355,i7_LQ_Rweevil_c228/f1p0/7364,i2_LQ_Rweevil_c57464/f1p25/2964,i0_LQ_Rweevil_c6640/f1p3/886,i1_LQ_Rweevil_c41303/f1p0/1531,i1_LQ_Rweevil_c68573/f1p4/1167,i7_LQ_Rweevil_c645/f1p0/7459,…	2	i1_HQ_Rweevil_c557/f31p0/1437,i1_LQ_Rweevil_c5052/f1p0/1620
GO:0005215	transporter activity	molecular_function	3.6072e-08	1.0798e-05	323	3203	2136	27707	199	i7_LQ_Rweevil_c565/f1p0/7239,i1_LQ_Rweevil_c67716/f1p0/1675,i2_HQ_Rweevil_c11897/f2p0/2255,i4_LQ_Rweevil_c4591/f1p0/4277,i9_LQ_Rweevil_c52/f1p0/9361,i2_HQ_Rweevil_c147268/f2p3/2179,i4_LQ_Rweevil_c11799/f1p0/5004,i5_LQ_Rweevil_c3974/f1p0/5609,i1_LQ_Rweevil_c31076/f1p0/1335,i2_HQ_Rweevil_c60720/f3p2/2422,i0_LQ_Rweevil_c4460/f2p0/859,i2_LQ_Rweevil_c83385/f1p3/2850,i2_LQ_Rweevil_c14107/f1p8/1889,i1_L…	124	i2_LQ_Rweevil_c82759/f1p10/2281,i3_LQ_Rweevil_c6635/f1p1/3900,i3_LQ_Rweevil_c28153/f1p2/3976,i2_HQ_Rweevil_c1225/f47p7/2430,i3_LQ_Rweevil_c28594/f1p0/3183,i4_LQ_Rweevil_c11407/f1p3/4884,i2_LQ_Rweevil_c35191/f1p4/2561,i1_LQ_Rweevil_c34927/f1p56/1047,i4_HQ_Rweevil_c13796/f11p0/4042,i0_HQ_Rweevil_c1204/f6p3/814,i2_LQ_Rweevil_c88626/f1p2/2735,i2_LQ_Rweevil_c134609/f1p3/2462,i2_LQ_Rweevil_c98093/f1p3/…
GO:0006869	lipid transport	biological_process	3.9528e-08	1.1044e-05	54	3203	220	27707	34	i2_LQ_Rweevil_c108705/f1p2/2381,i5_LQ_Rweevil_c2613/f1p0/5568,i2_LQ_Rweevil_c61004/f1p7/2613,i8_LQ_Rweevil_c102/f1p0/8951,i2_LQ_Rweevil_c42813/f1p13/3584,i4_LQ_Rweevil_c9100/f1p0/4526,i3_HQ_Rweevil_c19173/f2p0/3599,i5_LQ_Rweevil_c3893/f1p6/5592,i5_LQ_Rweevil_c5084/f1p4/5096,i6_LQ_Rweevil_c646/f1p0/6611,i5_HQ_Rweevil_c241/f5p0/5603,i4_LQ_Rweevil_c11169/f1p53/4817,i1_LQ_Rweevil_c14992/f1p10/1123,i5…	20	i2_HQ_Rweevil_c81295/f2p0/2832,i3_HQ_Rweevil_c37843/f4p8/3049,i3_LQ_Rweevil_c12587/f1p0/3810,i0_LQ_Rweevil_c27970/f1p0/756,i3_LQ_Rweevil_c26847/f1p1/3275,i2_LQ_Rweevil_c88973/f1p4/2732,i3_LQ_Rweevil_c34058/f1p0/3086,i4_HQ_Rweevil_c1117/f4p0/4280,i2_LQ_Rweevil_c79187/f1p5/2298,i4_HQ_Rweevil_c877/f7p0/4503,i3_LQ_Rweevil_c34225/f1p0/3778,i2_LQ_Rweevil_c27295/f1p4/2730,i2_LQ_Rweevil_c82759/f1p10/2281…
GO:0005509	calcium ion binding	molecular_function	7.102e-08	1.7543e-05	117	3203	635	27707	62	i3_LQ_Rweevil_c29869/f1p0/3050,i0_HQ_Rweevil_c133/f27p0/615,i2_LQ_Rweevil_c19434/f1p4/2649,i0_LQ_Rweevil_c27657/f1p0/255,i2_HQ_Rweevil_c34386/f5p4/2589,i0_LQ_Rweevil_c48048/f1p0/716,i2_LQ_Rweevil_c37675/f1p3/2474,i0_LQ_Rweevil_c82337/f1p0/800,i0_LQ_Rweevil_c28083/f1p0/846,i0_LQ_Rweevil_c27920/f1p7/322,i5_LQ_Rweevil_c4017/f1p0/5765,i2_LQ_Rweevil_c39535/f1p25/2911,i0_LQ_Rweevil_c21120/f1p0/912,i3_L…	55	i2_LQ_Rweevil_c36112/f1p7/2962,i1_HQ_Rweevil_c50053/f3p0/1236,i1_LQ_Rweevil_c76758/f1p0/1841,i4_HQ_Rweevil_c13553/f26p6/4312,i1_LQ_Rweevil_c121769/f1p6/1602,i1_LQ_Rweevil_c47758/f1p0/1319,i4_LQ_Rweevil_c5576/f1p0/4591,i2_LQ_Rweevil_c59462/f1p1/2443,i0_LQ_Rweevil_c23030/f1p401/816,i9_LQ_Rweevil_c137/f1p0/9324,i4_LQ_Rweevil_c5628/f1p0/4227,i4_LQ_Rweevil_c10606/f1p6/4589,i5_LQ_Rweevil_c4591/f1p0/527…
GO:0006022	aminoglycan metabolic process	biological_process	7.1161e-08	1.7543e-05	47	3203	182	27707	8	i2_LQ_Rweevil_c65537/f1p11/2727,i1_LQ_Rweevil_c82662/f1p3/1716,i3_LQ_Rweevil_c10260/f1p3/3245,i2_LQ_Rweevil_c34747/f2p9/2361,i1_HQ_Rweevil_c14225/f2p0/1191,i0_HQ_Rweevil_c12327/f4p0/876,i3_LQ_Rweevil_c5876/f1p0/3592,i1_LQ_Rweevil_c36647/f1p5/1091	39	i2_LQ_Rweevil_c11842/f1p1/2342,i2_LQ_Rweevil_c61639/f1p1/2456,i1_LQ_Rweevil_c147666/f1p2/1000,i9_LQ_Rweevil_c251/f1p0/9170,i2_LQ_Rweevil_c61151/f1p37/2423,i3_LQ_Rweevil_c10644/f1p3/3279,i2_LQ_Rweevil_c107146/f1p1/2203,i2_LQ_Rweevil_c113040/f1p22/2476,i4_LQ_Rweevil_c8063/f1p0/4773,i2_HQ_Rweevil_c118279/f2p23/2089,i4_LQ_Rweevil_c6590/f1p2/4115,i1_LQ_Rweevil_c24984/f1p21/1296,i2_LQ_Rweevil_c22586/f1…
GO:0010876	lipid localization	biological_process	1.7282e-07	4.0239e-05	54	3203	230	27707	34	i4_LQ_Rweevil_c9100/f1p0/4526,i2_LQ_Rweevil_c42813/f1p13/3584,i8_LQ_Rweevil_c102/f1p0/8951,i2_LQ_Rweevil_c61004/f1p7/2613,i2_LQ_Rweevil_c108705/f1p2/2381,i5_LQ_Rweevil_c2613/f1p0/5568,i2_LQ_Rweevil_c36586/f2p13/2865,i5_LQ_Rweevil_c3578/f1p0/5624,i1_LQ_Rweevil_c14992/f1p10/1123,i6_LQ_Rweevil_c646/f1p0/6611,i5_HQ_Rweevil_c241/f5p0/5603,i5_LQ_Rweevil_c5084/f1p4/5096,i4_LQ_Rweevil_c11169/f1p53/4817,i…	20	i4_HQ_Rweevil_c1117/f4p0/4280,i2_LQ_Rweevil_c88973/f1p4/2732,i3_LQ_Rweevil_c34058/f1p0/3086,i2_LQ_Rweevil_c79187/f1p5/2298,i3_LQ_Rweevil_c26847/f1p1/3275,i3_LQ_Rweevil_c12587/f1p0/3810,i0_LQ_Rweevil_c27970/f1p0/756,i3_HQ_Rweevil_c37843/f4p8/3049,i2_HQ_Rweevil_c81295/f2p0/2832,i3_LQ_Rweevil_c34225/f1p0/3778,i4_HQ_Rweevil_c877/f7p0/4503,i3_HQ_Rweevil_c40362/f2p0/3048,i2_LQ_Rweevil_c82759/f1p10/2281…
GO:0022836	gated channel activity	molecular_function	3.0946e-07	6.8261e-05	49	3203	205	27707	36	i4_HQ_Rweevil_c1587/f2p0/4333,i3_LQ_Rweevil_c18168/f1p4/3895,i3_LQ_Rweevil_c9325/f1p0/3547,i0_LQ_Rweevil_c10200/f1p12/710,i3_LQ_Rweevil_c36265/f1p0/3285,i6_LQ_Rweevil_c392/f1p0/6215,i4_LQ_Rweevil_c10367/f1p0/4292,i3_HQ_Rweevil_c4635/f2p25/3467,i1_LQ_Rweevil_c8309/f1p0/1805,i5_LQ_Rweevil_c2933/f1p1/5226,i3_LQ_Rweevil_c4368/f1p34/3174,i1_LQ_Rweevil_c8453/f1p2/1955,i6_LQ_Rweevil_c1924/f1p6/6892,i3_L…	13	i2_LQ_Rweevil_c59048/f1p0/2825,i0_HQ_Rweevil_c1204/f6p3/814,i3_LQ_Rweevil_c7034/f2p0/3847,i3_HQ_Rweevil_c13063/f2p0/3444,i2_LQ_Rweevil_c88015/f1p8/2583,i2_LQ_Rweevil_c63508/f1p2/2279,i3_LQ_Rweevil_c18886/f1p24/3536,i1_HQ_Rweevil_c44725/f2p0/1516,i1_LQ_Rweevil_c77054/f1p0/1592,i2_LQ_Rweevil_c58489/f1p1/2665,i3_LQ_Rweevil_c20521/f1p9/3860,i2_HQ_Rweevil_c51491/f15p5/2116,i1_LQ_Rweevil_c62938/f1p0/11…
GO:1901135	carbohydrate derivative metabolic process	biological_process	3.6019e-07	7.1469e-05	140	3203	820	27707	59	i2_LQ_Rweevil_c5234/f1p9/2244,i2_LQ_Rweevil_c25688/f1p13/2199,i1_LQ_Rweevil_c36647/f1p5/1091,i1_HQ_Rweevil_c28594/f3p0/1974,i5_LQ_Rweevil_c2078/f1p3/5390,i2_LQ_Rweevil_c54553/f1p9/2408,i4_LQ_Rweevil_c13238/f1p0/4044,i1_LQ_Rweevil_c80080/f1p0/1860,i3_LQ_Rweevil_c5876/f1p0/3592,i2_HQ_Rweevil_c78235/f2p2/2278,i5_HQ_Rweevil_c536/f2p0/5326,i4_LQ_Rweevil_c7765/f1p0/4625,i1_LQ_Rweevil_c89505/f1p0/1034,i…	81	i2_LQ_Rweevil_c62523/f1p0/2659,i3_HQ_Rweevil_c1347/f10p0/3386,i3_LQ_Rweevil_c7589/f1p21/3380,i2_LQ_Rweevil_c82070/f1p22/2201,i2_LQ_Rweevil_c106679/f1p92/2418,i1_LQ_Rweevil_c47457/f1p6/1764,i5_HQ_Rweevil_c5257/f10p6/5537,i2_LQ_Rweevil_c3193/f1p16/2518,i1_LQ_Rweevil_c51305/f1p0/1834,i4_LQ_Rweevil_c2344/f1p1/4974,i2_LQ_Rweevil_c135543/f1p8/2531,i4_LQ_Rweevil_c5628/f1p0/4227,i4_LQ_Rweevil_c4272/f1p0/…
GO:0005230	extracellular ligand-gated ion channel activity	molecular_function	3.7321e-07	7.1469e-05	27	3203	83	27707	21	i4_LQ_Rweevil_c7828/f1p0/4820,i3_LQ_Rweevil_c6355/f1p0/3354,i4_LQ_Rweevil_c9219/f1p0/4203,i3_LQ_Rweevil_c19469/f1p31/3545,i2_LQ_Rweevil_c42783/f1p0/2854,i5_LQ_Rweevil_c2933/f1p1/5226,i3_LQ_Rweevil_c14969/f1p0/3036,i3_LQ_Rweevil_c20923/f1p1/3559,i3_LQ_Rweevil_c22897/f1p0/3779,i3_LQ_Rweevil_c27493/f1p3/3272,i3_HQ_Rweevil_c4635/f2p25/3467,i4_LQ_Rweevil_c10367/f1p0/4292,i2_LQ_Rweevil_c13671/f1p10/292…	6	i2_LQ_Rweevil_c58489/f1p1/2665,i1_LQ_Rweevil_c62938/f1p0/1107,i3_LQ_Rweevil_c20521/f1p9/3860,i1_HQ_Rweevil_c44725/f2p0/1516,i3_LQ_Rweevil_c18886/f1p24/3536,i2_LQ_Rweevil_c63508/f1p2/2279
GO:0005576	extracellular region	cellular_component	3.7517e-07	7.1469e-05	164	3203	990	27707	74	i2_HQ_Rweevil_c147837/f3p5/2250,i0_LQ_Rweevil_c57882/f1p0/563,i1_LQ_Rweevil_c43628/f1p0/1828,i1_LQ_Rweevil_c50155/f1p1/1754,i2_HQ_Rweevil_c17608/f8p11/2719,i1_LQ_Rweevil_c82662/f1p3/1716,i2_LQ_Rweevil_c65537/f1p11/2727,i5_LQ_Rweevil_c4297/f1p0/6130,i1_LQ_Rweevil_c53159/f1p0/1654,i2_HQ_Rweevil_c6338/f2p14/2714,i1_LQ_Rweevil_c14992/f1p10/1123,i1_HQ_Rweevil_c29570/f2p0/1375,i1_LQ_Rweevil_c48518/f1p0…	90	i0_LQ_Rweevil_c15452/f1p0/544,i5_LQ_Rweevil_c1020/f1p0/5164,i2_LQ_Rweevil_c106373/f1p10/2198,i3_LQ_Rweevil_c5647/f1p0/3916,i2_LQ_Rweevil_c22586/f1p38/2265,i3_LQ_Rweevil_c25836/f1p0/3224,i2_LQ_Rweevil_c113040/f1p22/2476,i2_HQ_Rweevil_c118279/f2p23/2089,i0_HQ_Rweevil_c1733/f4p0/381,i4_HQ_Rweevil_c12387/f2p6/4055,i2_LQ_Rweevil_c12527/f1p0/2142,i1_LQ_Rweevil_c147666/f1p2/1000,i9_LQ_Rweevil_c251/f1p0/…
GO:0016020	membrane	cellular_component	4.1776e-07	7.6123e-05	800	3203	6011	27707	369	i0_LQ_Rweevil_c56803/f1p2/844,i2_LQ_Rweevil_c63058/f1p19/2866,i3_LQ_Rweevil_c14536/f1p3/3055,i1_LQ_Rweevil_c81206/f1p0/1743,i2_HQ_Rweevil_c128926/f2p4/2512,i2_LQ_Rweevil_c12155/f1p5/2420,i3_LQ_Rweevil_c28201/f1p0/3712,i3_LQ_Rweevil_c7653/f1p0/3118,i2_LQ_Rweevil_c43542/f1p12/2791,i3_LQ_Rweevil_c14621/f1p14/3017,i6_LQ_Rweevil_c412/f1p7/6586,i2_HQ_Rweevil_c2447/f3p1/2651,i3_LQ_Rweevil_c11141/f1p3/32…	431	i3_LQ_Rweevil_c8050/f1p0/3517,i2_LQ_Rweevil_c88015/f1p8/2583,i2_LQ_Rweevil_c164071/f1p6/1987,i3_LQ_Rweevil_c26148/f1p0/3082,i5_LQ_Rweevil_c3100/f1p3/5519,i2_LQ_Rweevil_c3096/f1p7/2616,i4_LQ_Rweevil_c14240/f1p0/4337,i1_LQ_Rweevil_c75512/f1p0/1526,i3_HQ_Rweevil_c17415/f2p0/3076,i3_LQ_Rweevil_c22820/f1p0/3096,i4_LQ_Rweevil_c14144/f1p0/4166,i3_LQ_Rweevil_c18886/f1p24/3536,i1_LQ_Rweevil_c24511/f2p0/15…
GO:0005506	iron ion binding	molecular_function	5.2417e-07	9.1534e-05	73	3203	363	27707	57	i3_LQ_Rweevil_c9441/f1p17/3804,i0_LQ_Rweevil_c28504/f1p0/912,i1_LQ_Rweevil_c81206/f1p0/1743,i0_HQ_Rweevil_c19924/f9p0/678,i7_LQ_Rweevil_c565/f1p0/7239,i1_LQ_Rweevil_c68931/f1p5/1173,i2_LQ_Rweevil_c38847/f1p23/2427,i2_LQ_Rweevil_c39432/f1p6/2777,i3_HQ_Rweevil_c33406/f2p0/3767,i0_LQ_Rweevil_c38022/f1p0/855,i5_LQ_Rweevil_c2758/f1p0/5543,i1_HQ_Rweevil_c2050/f8p3/1776,i1_LQ_Rweevil_c30343/f1p0/1382,i0…	16	i2_HQ_Rweevil_c15477/f28p7/2691,i7_LQ_Rweevil_c453/f1p0/7423,i2_LQ_Rweevil_c87949/f1p0/2703,i9_LQ_Rweevil_c119/f1p0/9611,i1_LQ_Rweevil_c72409/f1p0/1803,i3_LQ_Rweevil_c27969/f1p0/3702,i2_HQ_Rweevil_c73497/f26p7/2574,i1_HQ_Rweevil_c67115/f2p0/1678,i2_LQ_Rweevil_c35122/f1p3/2797,i1_LQ_Rweevil_c91074/f1p0/1127,i1_LQ_Rweevil_c16810/f1p0/1069,i5_LQ_Rweevil_c624/f1p0/5256,i1_LQ_Rweevil_c56388/f1p0/1048,…
GO:0004970	ionotropic glutamate receptor activity	molecular_function	1.1648e-06	0.00018775	22	3203	63	27707	20	i2_LQ_Rweevil_c13671/f1p10/2926,i3_HQ_Rweevil_c31965/f26p0/3474,i3_LQ_Rweevil_c14536/f1p3/3055,i3_LQ_Rweevil_c36851/f1p0/3504,i1_LQ_Rweevil_c81602/f1p0/1701,i4_LQ_Rweevil_c10367/f1p0/4292,i4_LQ_Rweevil_c5875/f1p0/4765,i3_LQ_Rweevil_c18168/f1p4/3895,i3_LQ_Rweevil_c9325/f1p0/3547,i4_LQ_Rweevil_c2690/f1p8/4937,i3_LQ_Rweevil_c19469/f1p31/3545,i4_LQ_Rweevil_c9219/f1p0/4203,i2_LQ_Rweevil_c42783/f1p0/28…	2	i2_LQ_Rweevil_c58489/f1p1/2665,i3_LQ_Rweevil_c18886/f1p24/3536
GO:0008066	glutamate receptor activity	molecular_function	1.1648e-06	0.00018775	22	3203	63	27707	20	i3_LQ_Rweevil_c22897/f1p0/3779,i3_LQ_Rweevil_c27493/f1p3/3272,i3_LQ_Rweevil_c20923/f1p1/3559,i3_LQ_Rweevil_c14969/f1p0/3036,i5_LQ_Rweevil_c2933/f1p1/5226,i2_LQ_Rweevil_c42783/f1p0/2854,i3_LQ_Rweevil_c19469/f1p31/3545,i4_LQ_Rweevil_c9219/f1p0/4203,i3_LQ_Rweevil_c6355/f1p0/3354,i4_LQ_Rweevil_c7828/f1p0/4820,i3_LQ_Rweevil_c18168/f1p4/3895,i3_LQ_Rweevil_c9325/f1p0/3547,i4_LQ_Rweevil_c5875/f1p0/4765,i…	2	i3_LQ_Rweevil_c18886/f1p24/3536,i2_LQ_Rweevil_c58489/f1p1/2665
GO:0031110	regulation of microtubule polymerization or depolymerization	biological_process	4.8943e-06	0.0007597	13	3203	28	27707	1	i3_LQ_Rweevil_c28485/f1p0/3157	12	i3_HQ_Rweevil_c37843/f4p8/3049,i2_HQ_Rweevil_c81295/f2p0/2832,i3_LQ_Rweevil_c29801/f1p0/3108,i3_HQ_Rweevil_c40362/f2p0/3048,i3_LQ_Rweevil_c11316/f1p53/3435,i5_LQ_Rweevil_c3661/f1p0/5446,i3_LQ_Rweevil_c25836/f1p0/3224,i3_LQ_Rweevil_c26847/f1p1/3275,i3_LQ_Rweevil_c15181/f1p0/3061,i3_LQ_Rweevil_c15089/f1p1/3036,i3_LQ_Rweevil_c2747/f1p0/3313,i3_LQ_Rweevil_c34058/f1p0/3086
GO:0015276	ligand-gated ion channel activity	molecular_function	7.184e-06	0.0010382	36	3203	146	27707	28	i3_LQ_Rweevil_c22897/f1p0/3779,i3_HQ_Rweevil_c1899/f3p3/3226,i3_LQ_Rweevil_c20923/f1p1/3559,i5_LQ_Rweevil_c2933/f1p1/5226,i3_LQ_Rweevil_c19469/f1p31/3545,i4_LQ_Rweevil_c9219/f1p0/4203,i3_LQ_Rweevil_c6355/f1p0/3354,i4_LQ_Rweevil_c7828/f1p0/4820,i4_HQ_Rweevil_c1587/f2p0/4333,i3_LQ_Rweevil_c18168/f1p4/3895,i3_LQ_Rweevil_c9325/f1p0/3547,i0_LQ_Rweevil_c10200/f1p12/710,i3_LQ_Rweevil_c36265/f1p0/3285,i4…	8	i3_LQ_Rweevil_c7034/f2p0/3847,i0_HQ_Rweevil_c1204/f6p3/814,i3_LQ_Rweevil_c18886/f1p24/3536,i1_HQ_Rweevil_c44725/f2p0/1516,i3_LQ_Rweevil_c20521/f1p9/3860,i1_LQ_Rweevil_c62938/f1p0/1107,i2_LQ_Rweevil_c58489/f1p1/2665,i2_LQ_Rweevil_c63508/f1p2/2279
GO:0022834	ligand-gated channel activity	molecular_function	7.184e-06	0.0010382	36	3203	146	27707	28	i2_LQ_Rweevil_c13671/f1p10/2926,i3_HQ_Rweevil_c31965/f26p0/3474,i1_LQ_Rweevil_c30819/f1p9/1646,i3_LQ_Rweevil_c14536/f1p3/3055,i3_LQ_Rweevil_c36851/f1p0/3504,i1_LQ_Rweevil_c81602/f1p0/1701,i4_LQ_Rweevil_c5875/f1p0/4765,i2_LQ_Rweevil_c56369/f1p8/2079,i4_LQ_Rweevil_c2690/f1p8/4937,i3_LQ_Rweevil_c33769/f1p0/3187,i2_LQ_Rweevil_c42783/f1p0/2854,i3_LQ_Rweevil_c14969/f1p0/3036,i3_LQ_Rweevil_c27493/f1p3/3…	8	i2_LQ_Rweevil_c63508/f1p2/2279,i1_LQ_Rweevil_c62938/f1p0/1107,i3_LQ_Rweevil_c20521/f1p9/3860,i2_LQ_Rweevil_c58489/f1p1/2665,i1_HQ_Rweevil_c44725/f2p0/1516,i3_LQ_Rweevil_c18886/f1p24/3536,i0_HQ_Rweevil_c1204/f6p3/814,i3_LQ_Rweevil_c7034/f2p0/3847
GO:0022857	transmembrane transporter activity	molecular_function	1.4211e-05	0.0019563	262	3203	1779	27707	161	i3_LQ_Rweevil_c14969/f1p0/3036,i1_LQ_Rweevil_c34353/f1p0/1023,i0_HQ_Rweevil_c71790/f5p0/583,i3_LQ_Rweevil_c14324/f1p0/3022,i1_LQ_Rweevil_c4272/f2p0/1985,i2_HQ_Rweevil_c21798/f2p0/2572,i3_LQ_Rweevil_c33769/f1p0/3187,i0_LQ_Rweevil_c26298/f1p0/337,i1_LQ_Rweevil_c23034/f1p5/1677,i0_LQ_Rweevil_c28504/f1p0/912,i5_LQ_Rweevil_c4622/f1p0/5571,i3_HQ_Rweevil_c31965/f26p0/3474,i1_LQ_Rweevil_c4310/f1p0/1312,i…	101	i2_HQ_Rweevil_c14224/f19p5/2457,i2_HQ_Rweevil_c9113/f3p0/2713,i6_LQ_Rweevil_c1211/f1p0/6109,i3_LQ_Rweevil_c26468/f1p12/3522,i3_LQ_Rweevil_c3825/f1p0/3470,i1_LQ_Rweevil_c11386/f1p0/1543,i2_LQ_Rweevil_c154820/f1p6/2288,i1_HQ_Rweevil_c1755/f15p0/1896,i1_LQ_Rweevil_c29965/f1p0/1515,i3_LQ_Rweevil_c25315/f1p7/3748,i2_HQ_Rweevil_c73812/f71p8/2921,i2_HQ_Rweevil_c148481/f56p0/2908,i2_LQ_Rweevil_c22765/f1p…
GO:0005549	odorant binding	molecular_function	1.4799e-05	0.0019563	15	3203	41	27707	3	i0_LQ_Rweevil_c31008/f1p0/654,i3_LQ_Rweevil_c12700/f1p2/3804,i2_HQ_Rweevil_c26679/f2p49/2691	12	i0_LQ_Rweevil_c9787/f1p13/1189,i2_HQ_Rweevil_c61602/f3p71/2491,i2_HQ_Rweevil_c18947/f2p121/2591,i0_HQ_Rweevil_c7671/f2p53/965,i0_LQ_Rweevil_c5615/f1p6/836,i5_LQ_Rweevil_c1892/f1p0/5950,i0_HQ_Rweevil_c8377/f7p7/526,i1_LQ_Rweevil_c24749/f1p0/1156,i0_LQ_Rweevil_c22879/f1p0/607,i0_LQ_Rweevil_c3685/f1p0/595,i0_HQ_Rweevil_c966/f6p0/543,i0_HQ_Rweevil_c4778/f3p0/680
GO:0005231	excitatory extracellular ligand-gated ion channel activity	molecular_function	1.5404e-05	0.0019563	17	3203	48	27707	15	i3_LQ_Rweevil_c6355/f1p0/3354,i4_LQ_Rweevil_c7828/f1p0/4820,i3_LQ_Rweevil_c19469/f1p31/3545,i4_LQ_Rweevil_c9219/f1p0/4203,i2_LQ_Rweevil_c42783/f1p0/2854,i3_LQ_Rweevil_c20923/f1p1/3559,i3_LQ_Rweevil_c14969/f1p0/3036,i3_LQ_Rweevil_c27493/f1p3/3272,i4_LQ_Rweevil_c10367/f1p0/4292,i3_HQ_Rweevil_c31965/f26p0/3474,i3_LQ_Rweevil_c14536/f1p3/3055,i3_LQ_Rweevil_c36851/f1p0/3504,i4_LQ_Rweevil_c2690/f1p8/493…	2	i2_LQ_Rweevil_c58489/f1p1/2665,i3_LQ_Rweevil_c18886/f1p24/3536
GO:0005234	extracellular-glutamate-gated ion channel activity	molecular_function	1.5404e-05	0.0019563	17	3203	48	27707	15	i4_LQ_Rweevil_c10367/f1p0/4292,i3_LQ_Rweevil_c36851/f1p0/3504,i3_HQ_Rweevil_c31965/f26p0/3474,i3_LQ_Rweevil_c14536/f1p3/3055,i4_LQ_Rweevil_c2690/f1p8/4937,i3_LQ_Rweevil_c9325/f1p0/3547,i4_LQ_Rweevil_c5875/f1p0/4765,i4_LQ_Rweevil_c7828/f1p0/4820,i3_LQ_Rweevil_c6355/f1p0/3354,i2_LQ_Rweevil_c42783/f1p0/2854,i4_LQ_Rweevil_c9219/f1p0/4203,i3_LQ_Rweevil_c19469/f1p31/3545,i3_LQ_Rweevil_c27493/f1p3/3272,…	2	i2_LQ_Rweevil_c58489/f1p1/2665,i3_LQ_Rweevil_c18886/f1p24/3536
GO:0055085	transmembrane transport	biological_process	2.0851e-05	0.0025702	244	3203	1646	27707	129	i0_LQ_Rweevil_c72444/f1p0/790,i3_LQ_Rweevil_c23430/f1p4/3618,i2_LQ_Rweevil_c29492/f1p11/2233,i2_HQ_Rweevil_c126317/f3p4/2408,i5_HQ_Rweevil_c241/f5p0/5603,i4_LQ_Rweevil_c7548/f1p0/4229,i2_HQ_Rweevil_c139470/f2p0/2047,i2_LQ_Rweevil_c87392/f1p3/2803,i1_LQ_Rweevil_c3470/f1p7/1711,i4_LQ_Rweevil_c2097/f1p8/4133,i2_LQ_Rweevil_c49872/f1p23/2064,i2_LQ_Rweevil_c14107/f1p8/1889,i0_LQ_Rweevil_c10200/f1p12/71…	115	i1_LQ_Rweevil_c45899/f1p0/1916,i4_LQ_Rweevil_c11680/f1p0/4123,i2_HQ_Rweevil_c118188/f3p3/2034,i2_LQ_Rweevil_c146451/f1p0/2080,i2_LQ_Rweevil_c461/f49p8/2881,i2_LQ_Rweevil_c54741/f1p0/2711,i2_LQ_Rweevil_c79291/f1p1/2970,i2_HQ_Rweevil_c57109/f2p0/2360,i4_HQ_Rweevil_c13796/f11p0/4042,i3_HQ_Rweevil_c2371/f3p4/3348,i3_LQ_Rweevil_c18759/f1p0/3730,i4_LQ_Rweevil_c11819/f1p0/4482,i2_LQ_Rweevil_c82722/f1p0/…
GO:1902578	single-organism localization	biological_process	2.5027e-05	0.0029969	412	3203	2969	27707	212	i1_HQ_Rweevil_c18879/f5p0/1698,i7_LQ_Rweevil_c1012/f1p0/7162,i5_LQ_Rweevil_c3578/f1p0/5624,i2_LQ_Rweevil_c109951/f1p7/2840,i2_LQ_Rweevil_c104109/f1p5/2945,i5_LQ_Rweevil_c3893/f1p6/5592,i3_HQ_Rweevil_c19173/f2p0/3599,i1_LQ_Rweevil_c80080/f1p0/1860,i2_LQ_Rweevil_c80268/f1p6/2260,i4_LQ_Rweevil_c13238/f1p0/4044,i2_LQ_Rweevil_c64889/f1p42/2338,i8_LQ_Rweevil_c270/f1p0/8923,i1_LQ_Rweevil_c67077/f1p0/198…	200	i3_LQ_Rweevil_c36556/f1p0/3665,i5_LQ_Rweevil_c5160/f1p0/5009,i1_LQ_Rweevil_c5140/f4p8/1500,i2_LQ_Rweevil_c109592/f1p3/2553,i2_LQ_Rweevil_c42199/f1p3/2207,i2_LQ_Rweevil_c38367/f1p5/2852,i1_LQ_Rweevil_c73447/f1p5/1598,i3_HQ_Rweevil_c31946/f39p0/3978,i2_LQ_Rweevil_c87865/f1p2/2985,i2_LQ_Rweevil_c87508/f1p0/2164,i6_LQ_Rweevil_c2072/f1p0/6047,i2_LQ_Rweevil_c112147/f1p2/2308,i5_LQ_Rweevil_c4365/f1p0/52…
GO:0044765	single-organism transport	biological_process	3.0484e-05	0.0035488	405	3203	2919	27707	211	i2_HQ_Rweevil_c78235/f2p2/2278,i2_LQ_Rweevil_c12234/f1p0/2480,i2_LQ_Rweevil_c25688/f1p13/2199,i9_LQ_Rweevil_c83/f1p0/9799,i2_HQ_Rweevil_c17371/f4p10/2927,i6_LQ_Rweevil_c646/f1p0/6611,i4_LQ_Rweevil_c4177/f1p1/4420,i3_LQ_Rweevil_c15241/f1p0/3115,i4_HQ_Rweevil_c1588/f2p0/4834,i2_LQ_Rweevil_c36370/f1p27/2340,i3_LQ_Rweevil_c3897/f1p0/3428,i2_LQ_Rweevil_c56369/f1p8/2079,i4_HQ_Rweevil_c1144/f4p0/4139,i4…	194	i2_LQ_Rweevil_c59048/f1p0/2825,i3_LQ_Rweevil_c26847/f1p1/3275,i2_LQ_Rweevil_c116774/f1p1/2668,i3_LQ_Rweevil_c12587/f1p0/3810,i3_HQ_Rweevil_c1505/f7p0/3668,i3_LQ_Rweevil_c27239/f1p29/3148,i2_LQ_Rweevil_c106820/f1p5/2409,i2_LQ_Rweevil_c13129/f1p36/2617,i1_LQ_Rweevil_c43311/f1p0/1185,i2_LQ_Rweevil_c6590/f1p2/2554,i2_LQ_Rweevil_c109309/f1p7/2632,i2_LQ_Rweevil_c37114/f1p136/2538,i2_LQ_Rweevil_c85150/f…
GO:0022892	substrate-specific transporter activity	molecular_function	3.229e-05	0.0036346	212	3203	1417	27707	137	i8_LQ_Rweevil_c244/f1p0/8473,i0_LQ_Rweevil_c27279/f1p3/610,i4_HQ_Rweevil_c1289/f3p0/4466,i5_LQ_Rweevil_c4622/f1p0/5571,i0_LQ_Rweevil_c28504/f1p0/912,i3_HQ_Rweevil_c31965/f26p0/3474,i1_LQ_Rweevil_c81602/f1p0/1701,i2_LQ_Rweevil_c8029/f1p66/2558,i0_LQ_Rweevil_c26298/f1p0/337,i2_LQ_Rweevil_c123595/f1p0/2067,i4_LQ_Rweevil_c5875/f1p0/4765,i1_LQ_Rweevil_c23034/f1p5/1677,i1_LQ_Rweevil_c4272/f2p0/1985,i3_…	75	i1_LQ_Rweevil_c11386/f1p0/1543,i2_LQ_Rweevil_c154820/f1p6/2288,i2_LQ_Rweevil_c63508/f1p2/2279,i3_LQ_Rweevil_c43158/f1p0/3009,i3_LQ_Rweevil_c26468/f1p12/3522,i2_HQ_Rweevil_c9113/f3p0/2713,i4_LQ_Rweevil_c7155/f1p0/4814,i2_HQ_Rweevil_c14224/f19p5/2457,i2_HQ_Rweevil_c148481/f56p0/2908,i2_HQ_Rweevil_c73812/f71p8/2921,i6_LQ_Rweevil_c1261/f1p0/6409,i3_HQ_Rweevil_c13063/f2p0/3444,i3_LQ_Rweevil_c7034/f2p0…
GO:0015075	ion transmembrane transporter activity	molecular_function	3.2955e-05	0.0036346	185	3203	1213	27707	122	i3_LQ_Rweevil_c33769/f1p0/3187,i1_LQ_Rweevil_c4272/f2p0/1985,i3_LQ_Rweevil_c14969/f1p0/3036,i0_HQ_Rweevil_c71790/f5p0/583,i1_LQ_Rweevil_c34353/f1p0/1023,i3_HQ_Rweevil_c31965/f26p0/3474,i1_LQ_Rweevil_c81602/f1p0/1701,i0_LQ_Rweevil_c27279/f1p3/610,i4_HQ_Rweevil_c1289/f3p0/4466,i0_LQ_Rweevil_c28504/f1p0/912,i5_LQ_Rweevil_c4622/f1p0/5571,i2_LQ_Rweevil_c123595/f1p0/2067,i4_LQ_Rweevil_c5875/f1p0/4765,i…	63	i2_HQ_Rweevil_c9113/f3p0/2713,i2_HQ_Rweevil_c14224/f19p5/2457,i1_LQ_Rweevil_c11386/f1p0/1543,i2_LQ_Rweevil_c154820/f1p6/2288,i2_LQ_Rweevil_c63508/f1p2/2279,i3_LQ_Rweevil_c26468/f1p12/3522,i3_HQ_Rweevil_c13063/f2p0/3444,i3_LQ_Rweevil_c7034/f2p0/3847,i2_HQ_Rweevil_c148481/f56p0/2908,i2_HQ_Rweevil_c73812/f71p8/2921,i6_LQ_Rweevil_c1261/f1p0/6409,i2_HQ_Rweevil_c51491/f15p5/2116,i2_LQ_Rweevil_c108641/f…
GO:0022891	substrate-specific transmembrane transporter activity	molecular_function	4.2853e-05	0.004605	191	3203	1264	27707	123	i1_LQ_Rweevil_c5955/f1p0/1950,i0_LQ_Rweevil_c10200/f1p12/710,i1_LQ_Rweevil_c29610/f1p4/1799,i2_LQ_Rweevil_c14107/f1p8/1889,i2_LQ_Rweevil_c49872/f1p23/2064,i2_LQ_Rweevil_c27094/f1p302/2312,i4_LQ_Rweevil_c7548/f1p0/4229,i1_LQ_Rweevil_c10926/f1p0/1868,i2_HQ_Rweevil_c139470/f2p0/2047,i5_HQ_Rweevil_c241/f5p0/5603,i3_LQ_Rweevil_c23430/f1p4/3618,i0_LQ_Rweevil_c72444/f1p0/790,i9_LQ_Rweevil_c52/f1p0/9361,…	68	i0_HQ_Rweevil_c1204/f6p3/814,i3_LQ_Rweevil_c18759/f1p0/3730,i3_HQ_Rweevil_c2371/f3p4/3348,i4_LQ_Rweevil_c5458/f1p0/4730,i2_LQ_Rweevil_c54741/f1p0/2711,i2_LQ_Rweevil_c60363/f1p0/2837,i8_LQ_Rweevil_c516/f1p0/8024,i1_LQ_Rweevil_c45899/f1p0/1916,i3_LQ_Rweevil_c28153/f1p2/3976,i2_LQ_Rweevil_c88015/f1p8/2583,i3_LQ_Rweevil_c6635/f1p1/3900,i2_LQ_Rweevil_c41693/f1p3/2041,i2_LQ_Rweevil_c82759/f1p10/2281,i3…
GO:0005975	carbohydrate metabolic process	biological_process	4.6494e-05	0.0048714	160	3203	1025	27707	62	i1_LQ_Rweevil_c11909/f1p0/1874,i1_HQ_Rweevil_c20209/f2p0/1783,i2_LQ_Rweevil_c77205/f1p12/2135,i2_LQ_Rweevil_c95320/f1p1/2017,i2_LQ_Rweevil_c10000/f1p2/2799,i1_LQ_Rweevil_c65508/f1p0/1426,i2_LQ_Rweevil_c85075/f1p85/3024,i2_HQ_Rweevil_c55937/f2p0/2431,i2_HQ_Rweevil_c17463/f2p1/2560,i3_LQ_Rweevil_c11128/f1p4/3153,i2_LQ_Rweevil_c43689/f1p265/2294,i3_LQ_Rweevil_c5805/f1p10/3150,i4_LQ_Rweevil_c11472/f1…	98	i4_LQ_Rweevil_c6874/f1p0/4695,i3_LQ_Rweevil_c27969/f1p0/3702,i1_LQ_Rweevil_c105149/f1p8/1946,i2_LQ_Rweevil_c85130/f1p0/2686,i1_LQ_Rweevil_c6276/f1p0/1731,i1_LQ_Rweevil_c48436/f1p0/1994,i5_LQ_Rweevil_c3151/f1p0/5163,i2_LQ_Rweevil_c24555/f1p5/2795,i3_LQ_Rweevil_c14505/f1p0/3055,i2_LQ_Rweevil_c49875/f1p14/2095,i2_LQ_Rweevil_c19512/f1p3/2852,i2_LQ_Rweevil_c85235/f1p3/2850,i2_HQ_Rweevil_c1810/f21p0/24…
GO:0005216	ion channel activity	molecular_function	5.6025e-05	0.0053364	63	3203	332	27707	45	i3_LQ_Rweevil_c27493/f1p3/3272,i3_LQ_Rweevil_c14969/f1p0/3036,i2_LQ_Rweevil_c42783/f1p0/2854,i3_LQ_Rweevil_c33769/f1p0/3187,i2_HQ_Rweevil_c147268/f2p3/2179,i5_LQ_Rweevil_c3974/f1p0/5609,i4_LQ_Rweevil_c4591/f1p0/4277,i4_LQ_Rweevil_c5875/f1p0/4765,i4_LQ_Rweevil_c2690/f1p8/4937,i2_LQ_Rweevil_c56369/f1p8/2079,i1_LQ_Rweevil_c30819/f1p9/1646,i3_LQ_Rweevil_c14536/f1p3/3055,i3_HQ_Rweevil_c31965/f26p0/347…	18	i1_LQ_Rweevil_c77054/f1p0/1592,i3_LQ_Rweevil_c18886/f1p24/3536,i1_HQ_Rweevil_c44725/f2p0/1516,i3_LQ_Rweevil_c20521/f1p9/3860,i2_HQ_Rweevil_c51491/f15p5/2116,i1_LQ_Rweevil_c62938/f1p0/1107,i2_LQ_Rweevil_c58489/f1p1/2665,i2_LQ_Rweevil_c88015/f1p8/2583,i2_LQ_Rweevil_c63508/f1p2/2279,i3_LQ_Rweevil_c7034/f2p0/3847,i3_HQ_Rweevil_c13063/f2p0/3444,i2_LQ_Rweevil_c43754/f1p0/2994,i2_LQ_Rweevil_c60363/f1p0/…
GO:0015267	channel activity	molecular_function	5.6025e-05	0.0053364	63	3203	332	27707	45	i2_LQ_Rweevil_c42783/f1p0/2854,i3_LQ_Rweevil_c33769/f1p0/3187,i2_HQ_Rweevil_c147268/f2p3/2179,i5_LQ_Rweevil_c3974/f1p0/5609,i3_LQ_Rweevil_c27493/f1p3/3272,i3_LQ_Rweevil_c14969/f1p0/3036,i3_LQ_Rweevil_c14536/f1p3/3055,i1_LQ_Rweevil_c30819/f1p9/1646,i3_HQ_Rweevil_c31965/f26p0/3474,i1_LQ_Rweevil_c81602/f1p0/1701,i3_LQ_Rweevil_c36851/f1p0/3504,i2_LQ_Rweevil_c13671/f1p10/2926,i6_LQ_Rweevil_c1820/f1p2/…	18	i3_LQ_Rweevil_c20521/f1p9/3860,i2_HQ_Rweevil_c51491/f15p5/2116,i1_LQ_Rweevil_c62938/f1p0/1107,i2_LQ_Rweevil_c58489/f1p1/2665,i1_LQ_Rweevil_c77054/f1p0/1592,i3_LQ_Rweevil_c18886/f1p24/3536,i1_HQ_Rweevil_c44725/f2p0/1516,i2_LQ_Rweevil_c63508/f1p2/2279,i2_LQ_Rweevil_c88015/f1p8/2583,i2_LQ_Rweevil_c60363/f1p0/2837,i2_LQ_Rweevil_c87865/f1p2/2985,i3_LQ_Rweevil_c7034/f2p0/3847,i3_HQ_Rweevil_c13063/f2p0/…
GO:0022803	passive transmembrane transporter activity	molecular_function	5.6025e-05	0.0053364	63	3203	332	27707	45	i3_HQ_Rweevil_c1899/f3p3/3226,i3_LQ_Rweevil_c22897/f1p0/3779,i3_LQ_Rweevil_c20923/f1p1/3559,i2_HQ_Rweevil_c24450/f2p8/2819,i5_LQ_Rweevil_c2933/f1p1/5226,i2_HQ_Rweevil_c17371/f4p10/2927,i6_LQ_Rweevil_c1924/f1p6/6892,i1_LQ_Rweevil_c8453/f1p2/1955,i3_LQ_Rweevil_c4368/f1p34/3174,i2_LQ_Rweevil_c104109/f1p5/2945,i5_LQ_Rweevil_c3209/f1p0/5482,i4_LQ_Rweevil_c9219/f1p0/4203,i3_LQ_Rweevil_c19469/f1p31/3545…	18	i3_LQ_Rweevil_c7034/f2p0/3847,i3_HQ_Rweevil_c13063/f2p0/3444,i2_LQ_Rweevil_c43754/f1p0/2994,i2_LQ_Rweevil_c60363/f1p0/2837,i2_LQ_Rweevil_c87865/f1p2/2985,i2_LQ_Rweevil_c59048/f1p0/2825,i0_HQ_Rweevil_c1204/f6p3/814,i3_HQ_Rweevil_c2371/f3p4/3348,i2_LQ_Rweevil_c13646/f1p3/2650,i1_LQ_Rweevil_c77054/f1p0/1592,i3_LQ_Rweevil_c18886/f1p24/3536,i1_HQ_Rweevil_c44725/f2p0/1516,i3_LQ_Rweevil_c20521/f1p9/3860…
GO:0022838	substrate-specific channel activity	molecular_function	5.6025e-05	0.0053364	63	3203	332	27707	45	i5_LQ_Rweevil_c2933/f1p1/5226,i2_HQ_Rweevil_c24450/f2p8/2819,i2_HQ_Rweevil_c17371/f4p10/2927,i6_LQ_Rweevil_c1924/f1p6/6892,i1_LQ_Rweevil_c8453/f1p2/1955,i3_LQ_Rweevil_c4368/f1p34/3174,i3_HQ_Rweevil_c1899/f3p3/3226,i3_LQ_Rweevil_c22897/f1p0/3779,i3_LQ_Rweevil_c20923/f1p1/3559,i6_LQ_Rweevil_c825/f1p16/6429,i4_LQ_Rweevil_c7828/f1p0/4820,i3_LQ_Rweevil_c6355/f1p0/3354,i2_LQ_Rweevil_c104109/f1p5/2945,i…	18	i2_LQ_Rweevil_c43754/f1p0/2994,i3_LQ_Rweevil_c7034/f2p0/3847,i3_HQ_Rweevil_c13063/f2p0/3444,i2_LQ_Rweevil_c87865/f1p2/2985,i2_LQ_Rweevil_c60363/f1p0/2837,i2_LQ_Rweevil_c59048/f1p0/2825,i0_HQ_Rweevil_c1204/f6p3/814,i2_LQ_Rweevil_c13646/f1p3/2650,i3_HQ_Rweevil_c2371/f3p4/3348,i3_LQ_Rweevil_c18886/f1p24/3536,i1_HQ_Rweevil_c44725/f2p0/1516,i1_LQ_Rweevil_c77054/f1p0/1592,i2_LQ_Rweevil_c58489/f1p1/2665…
GO:0042601	endospore-forming forespore	cellular_component	6.1605e-05	0.0056128	6	3203	8	27707	6	i5_HQ_Rweevil_c276/f4p0/5541,i6_LQ_Rweevil_c646/f1p0/6611,i5_LQ_Rweevil_c5084/f1p4/5096,i8_LQ_Rweevil_c244/f1p0/8473,i4_LQ_Rweevil_c8635/f1p11/4756,i3_LQ_Rweevil_c22669/f1p0/3277	0
GO:0042763	intracellular immature spore	cellular_component	6.1605e-05	0.0056128	6	3203	8	27707	6	i5_LQ_Rweevil_c5084/f1p4/5096,i5_HQ_Rweevil_c276/f4p0/5541,i6_LQ_Rweevil_c646/f1p0/6611,i4_LQ_Rweevil_c8635/f1p11/4756,i8_LQ_Rweevil_c244/f1p0/8473,i3_LQ_Rweevil_c22669/f1p0/3277	0
GO:0015672	monovalent inorganic cation transport	biological_process	7.811e-05	0.0069651	99	3203	592	27707	66	i1_LQ_Rweevil_c6630/f1p0/1720,i7_LQ_Rweevil_c1012/f1p0/7162,i2_LQ_Rweevil_c8751/f1p23/3093,i2_LQ_Rweevil_c25688/f1p13/2199,i2_LQ_Rweevil_c13338/f1p4/2300,i3_HQ_Rweevil_c19173/f2p0/3599,i0_LQ_Rweevil_c30759/f1p0/656,i6_LQ_Rweevil_c1913/f1p0/6208,i1_LQ_Rweevil_c80080/f1p0/1860,i6_LQ_Rweevil_c825/f1p16/6429,i4_LQ_Rweevil_c13238/f1p0/4044,i2_LQ_Rweevil_c55224/f1p4/2604,i2_HQ_Rweevil_c50762/f23p5/2889…	33	i2_LQ_Rweevil_c38367/f1p5/2852,i1_LQ_Rweevil_c73447/f1p5/1598,i1_LQ_Rweevil_c5140/f4p8/1500,i2_LQ_Rweevil_c87508/f1p0/2164,i2_LQ_Rweevil_c59048/f1p0/2825,i2_LQ_Rweevil_c77177/f1p2/3010,i2_LQ_Rweevil_c106820/f1p5/2409,i3_LQ_Rweevil_c12587/f1p0/3810,i2_LQ_Rweevil_c26338/f1p0/2901,i2_LQ_Rweevil_c22765/f1p28/2229,i1_LQ_Rweevil_c120821/f1p3/1109,i0_LQ_Rweevil_c22873/f1p0/943,i1_LQ_Rweevil_c77054/f1p0/…
GO:0045259	proton-transporting ATP synthase complex	cellular_component	8.0272e-05	0.0070088	27	3203	111	27707	18	i0_LQ_Rweevil_c37758/f1p0/987,i0_LQ_Rweevil_c32571/f1p0/845,i0_LQ_Rweevil_c26298/f1p0/337,i2_HQ_Rweevil_c78235/f2p2/2278,i0_LQ_Rweevil_c91019/f2p0/884,i1_LQ_Rweevil_c5955/f1p0/1950,i1_LQ_Rweevil_c23034/f1p5/1677,i0_LQ_Rweevil_c23175/f1p7/817,i1_LQ_Rweevil_c29610/f1p4/1799,i2_LQ_Rweevil_c8751/f1p23/3093,i1_LQ_Rweevil_c34353/f1p0/1023,i0_LQ_Rweevil_c30759/f1p0/656,i2_LQ_Rweevil_c82705/f1p23/2501,i4…	9	i6_LQ_Rweevil_c1261/f1p0/6409,i2_HQ_Rweevil_c73812/f71p8/2921,i2_HQ_Rweevil_c148481/f56p0/2908,i1_LQ_Rweevil_c34927/f1p56/1047,i3_LQ_Rweevil_c15089/f1p1/3036,i2_LQ_Rweevil_c87523/f1p5/2582,i2_HQ_Rweevil_c60499/f2p18/3879,i2_LQ_Rweevil_c108641/f1p22/2954,i1_HQ_Rweevil_c121140/f49p0/1116
GO:0045263	proton-transporting ATP synthase complex, coupling factor F(o)	cellular_component	0.0001257	0.010698	24	3203	96	27707	16	i2_LQ_Rweevil_c8751/f1p23/3093,i1_LQ_Rweevil_c34353/f1p0/1023,i2_LQ_Rweevil_c82705/f1p23/2501,i0_LQ_Rweevil_c30759/f1p0/656,i4_LQ_Rweevil_c7548/f1p0/4229,i6_LQ_Rweevil_c825/f1p16/6429,i4_LQ_Rweevil_c13238/f1p0/4044,i3_LQ_Rweevil_c23430/f1p4/3618,i0_LQ_Rweevil_c72444/f1p0/790,i0_LQ_Rweevil_c32571/f1p0/845,i0_LQ_Rweevil_c37758/f1p0/987,i2_HQ_Rweevil_c78235/f2p2/2278,i0_LQ_Rweevil_c91019/f2p0/884,i0…	8	i1_LQ_Rweevil_c34927/f1p56/1047,i3_LQ_Rweevil_c15089/f1p1/3036,i2_LQ_Rweevil_c87523/f1p5/2582,i2_HQ_Rweevil_c60499/f2p18/3879,i2_LQ_Rweevil_c108641/f1p22/2954,i1_HQ_Rweevil_c121140/f49p0/1116,i2_HQ_Rweevil_c73812/f71p8/2921,i2_HQ_Rweevil_c148481/f56p0/2908
GO:0015985	energy coupled proton transport, down electrochemical gradient	biological_process	0.00013019	0.010698	32	3203	144	27707	23	i1_LQ_Rweevil_c34353/f1p0/1023,i2_LQ_Rweevil_c82705/f1p23/2501,i0_LQ_Rweevil_c91019/f2p0/884,i0_LQ_Rweevil_c26298/f1p0/337,i0_LQ_Rweevil_c37758/f1p0/987,i1_LQ_Rweevil_c23034/f1p5/1677,i0_LQ_Rweevil_c23175/f1p7/817,i2_LQ_Rweevil_c8751/f1p23/3093,i2_LQ_Rweevil_c25688/f1p13/2199,i6_LQ_Rweevil_c825/f1p16/6429,i4_LQ_Rweevil_c7548/f1p0/4229,i4_LQ_Rweevil_c13238/f1p0/4044,i1_LQ_Rweevil_c80080/f1p0/1860,…	9	i1_LQ_Rweevil_c34927/f1p56/1047,i2_HQ_Rweevil_c60499/f2p18/3879,i2_LQ_Rweevil_c87523/f1p5/2582,i3_LQ_Rweevil_c15089/f1p1/3036,i1_HQ_Rweevil_c121140/f49p0/1116,i2_LQ_Rweevil_c108641/f1p22/2954,i2_HQ_Rweevil_c73812/f71p8/2921,i6_LQ_Rweevil_c1261/f1p0/6409,i2_HQ_Rweevil_c148481/f56p0/2908
GO:0015986	ATP synthesis coupled proton transport	biological_process	0.00013019	0.010698	32	3203	144	27707	23	i0_LQ_Rweevil_c37758/f1p0/987,i0_LQ_Rweevil_c26298/f1p0/337,i0_LQ_Rweevil_c91019/f2p0/884,i1_LQ_Rweevil_c23034/f1p5/1677,i0_LQ_Rweevil_c23175/f1p7/817,i1_LQ_Rweevil_c34353/f1p0/1023,i2_LQ_Rweevil_c82705/f1p23/2501,i0_LQ_Rweevil_c32571/f1p0/845,i2_HQ_Rweevil_c78235/f2p2/2278,i2_LQ_Rweevil_c58898/f1p0/2662,i1_LQ_Rweevil_c5955/f1p0/1950,i2_LQ_Rweevil_c29924/f1p3/2108,i1_LQ_Rweevil_c29610/f1p4/1799,i…	9	i1_LQ_Rweevil_c34927/f1p56/1047,i3_LQ_Rweevil_c15089/f1p1/3036,i2_HQ_Rweevil_c60499/f2p18/3879,i2_LQ_Rweevil_c87523/f1p5/2582,i2_LQ_Rweevil_c108641/f1p22/2954,i1_HQ_Rweevil_c121140/f49p0/1116,i2_HQ_Rweevil_c73812/f71p8/2921,i6_LQ_Rweevil_c1261/f1p0/6409,i2_HQ_Rweevil_c148481/f56p0/2908
GO:0020037	heme binding	molecular_function	0.00013955	0.011247	59	3203	318	27707	49	i2_LQ_Rweevil_c44954/f1p3/2376,i1_LQ_Rweevil_c68696/f1p0/1567,i2_LQ_Rweevil_c39432/f1p6/2777,i3_HQ_Rweevil_c33406/f2p0/3767,i2_HQ_Rweevil_c50773/f37p6/2359,i3_HQ_Rweevil_c15502/f17p0/3674,i5_LQ_Rweevil_c2758/f1p0/5543,i1_LQ_Rweevil_c42787/f1p0/1964,i3_LQ_Rweevil_c6855/f1p0/3795,i1_HQ_Rweevil_c2050/f8p3/1776,i1_LQ_Rweevil_c34860/f1p0/1051,i4_LQ_Rweevil_c2968/f1p0/4632,i3_LQ_Rweevil_c13629/f1p14/38…	10	i1_LQ_Rweevil_c70789/f1p0/1572,i2_LQ_Rweevil_c87949/f1p0/2703,i1_LQ_Rweevil_c72409/f1p0/1803,i1_HQ_Rweevil_c67115/f2p0/1678,i2_LQ_Rweevil_c35122/f1p3/2797,i1_HQ_Rweevil_c12244/f3p6/1652,i1_LQ_Rweevil_c25705/f1p0/1888,i2_LQ_Rweevil_c5503/f1p65/2335,i3_LQ_Rweevil_c7034/f2p0/3847,i5_LQ_Rweevil_c624/f1p0/5256
GO:0006754	ATP biosynthetic process	biological_process	0.0001498	0.011846	32	3203	145	27707	23	i0_LQ_Rweevil_c23175/f1p7/817,i1_LQ_Rweevil_c23034/f1p5/1677,i0_LQ_Rweevil_c26298/f1p0/337,i0_LQ_Rweevil_c91019/f2p0/884,i0_LQ_Rweevil_c37758/f1p0/987,i2_LQ_Rweevil_c82705/f1p23/2501,i1_LQ_Rweevil_c34353/f1p0/1023,i0_LQ_Rweevil_c58216/f1p0/679,i1_LQ_Rweevil_c29610/f1p4/1799,i2_LQ_Rweevil_c29924/f1p3/2108,i1_LQ_Rweevil_c5955/f1p0/1950,i2_HQ_Rweevil_c78235/f2p2/2278,i2_LQ_Rweevil_c58898/f1p0/2662,i…	9	i1_HQ_Rweevil_c121140/f49p0/1116,i2_LQ_Rweevil_c108641/f1p22/2954,i2_LQ_Rweevil_c87523/f1p5/2582,i2_HQ_Rweevil_c60499/f2p18/3879,i3_LQ_Rweevil_c15089/f1p1/3036,i1_LQ_Rweevil_c34927/f1p56/1047,i2_HQ_Rweevil_c148481/f56p0/2908,i6_LQ_Rweevil_c1261/f1p0/6409,i2_HQ_Rweevil_c73812/f71p8/2921
GO:0044425	membrane part	cellular_component	0.00015701	0.012186	514	3203	3868	27707	230	i2_HQ_Rweevil_c147084/f3p2/2302,i2_LQ_Rweevil_c111209/f1p1/2894,i2_LQ_Rweevil_c8751/f1p23/3093,i3_LQ_Rweevil_c17834/f1p0/3227,i3_LQ_Rweevil_c36150/f1p26/3152,i4_LQ_Rweevil_c10657/f1p2/4801,i2_HQ_Rweevil_c60750/f2p19/2949,i6_LQ_Rweevil_c218/f1p0/6339,i2_LQ_Rweevil_c113912/f1p0/2361,i2_LQ_Rweevil_c110995/f1p2/2222,i1_LQ_Rweevil_c68696/f1p0/1567,i6_LQ_Rweevil_c2214/f1p0/6047,i2_LQ_Rweevil_c135784/f1…	284	i3_HQ_Rweevil_c10966/f2p0/3172,i3_LQ_Rweevil_c8514/f1p7/3702,i4_HQ_Rweevil_c930/f5p0/4791,i2_LQ_Rweevil_c77690/f1p1/2690,i1_LQ_Rweevil_c91477/f1p0/1090,i5_LQ_Rweevil_c1930/f1p13/5305,i3_HQ_Rweevil_c1555/f5p0/3139,i2_LQ_Rweevil_c20186/f1p7/2802,i3_LQ_Rweevil_c34705/f1p0/3181,i2_HQ_Rweevil_c2340/f7p1/2708,i6_LQ_Rweevil_c822/f1p0/6346,i4_LQ_Rweevil_c10698/f1p0/4877,i3_HQ_Rweevil_c5994/f3p0/3652,i4_H…
GO:0032886	regulation of microtubule-based process	biological_process	0.00016396	0.01227	13	3203	37	27707	1	i3_LQ_Rweevil_c28485/f1p0/3157	12	i3_HQ_Rweevil_c40362/f2p0/3048,i3_LQ_Rweevil_c11316/f1p53/3435,i3_LQ_Rweevil_c29801/f1p0/3108,i3_HQ_Rweevil_c37843/f4p8/3049,i2_HQ_Rweevil_c81295/f2p0/2832,i3_LQ_Rweevil_c2747/f1p0/3313,i3_LQ_Rweevil_c34058/f1p0/3086,i3_LQ_Rweevil_c15089/f1p1/3036,i3_LQ_Rweevil_c26847/f1p1/3275,i3_LQ_Rweevil_c15181/f1p0/3061,i3_LQ_Rweevil_c25836/f1p0/3224,i5_LQ_Rweevil_c3661/f1p0/5446
GO:0070507	regulation of microtubule cytoskeleton organization	biological_process	0.00016396	0.01227	13	3203	37	27707	1	i3_LQ_Rweevil_c28485/f1p0/3157	12	i3_LQ_Rweevil_c2747/f1p0/3313,i3_LQ_Rweevil_c34058/f1p0/3086,i3_LQ_Rweevil_c15089/f1p1/3036,i3_LQ_Rweevil_c26847/f1p1/3275,i3_LQ_Rweevil_c15181/f1p0/3061,i3_LQ_Rweevil_c25836/f1p0/3224,i5_LQ_Rweevil_c3661/f1p0/5446,i3_HQ_Rweevil_c40362/f2p0/3048,i3_LQ_Rweevil_c11316/f1p53/3435,i3_LQ_Rweevil_c29801/f1p0/3108,i3_HQ_Rweevil_c37843/f4p8/3049,i2_HQ_Rweevil_c81295/f2p0/2832
GO:0004367	glycerol-3-phosphate dehydrogenase [NAD+] activity	molecular_function	0.00016809	0.012359	8	3203	16	27707	8	i1_HQ_Rweevil_c20209/f2p0/1783,i4_LQ_Rweevil_c10031/f1p0/4585,i1_HQ_Rweevil_c141117/f3p0/1678,i1_LQ_Rweevil_c65508/f1p0/1426,i2_LQ_Rweevil_c164541/f1p10/2003,i1_HQ_Rweevil_c120705/f5p0/1946,i3_HQ_Rweevil_c4085/f2p0/3271,i3_HQ_Rweevil_c17540/f4p20/3813	0
GO:0046906	tetrapyrrole binding	molecular_function	0.00018037	0.013033	59	3203	321	27707	49	i1_LQ_Rweevil_c118718/f1p4/1058,i0_LQ_Rweevil_c28504/f1p0/912,i3_LQ_Rweevil_c9441/f1p17/3804,i1_LQ_Rweevil_c81206/f1p0/1743,i7_LQ_Rweevil_c565/f1p0/7239,i5_LQ_Rweevil_c4276/f1p0/5488,i3_LQ_Rweevil_c24046/f1p0/3300,i2_LQ_Rweevil_c63053/f1p9/2390,i2_LQ_Rweevil_c44954/f1p3/2376,i1_LQ_Rweevil_c68696/f1p0/1567,i2_HQ_Rweevil_c50773/f37p6/2359,i2_LQ_Rweevil_c39432/f1p6/2777,i3_HQ_Rweevil_c33406/f2p0/376…	10	i1_HQ_Rweevil_c67115/f2p0/1678,i2_LQ_Rweevil_c35122/f1p3/2797,i1_HQ_Rweevil_c12244/f3p6/1652,i1_LQ_Rweevil_c70789/f1p0/1572,i2_LQ_Rweevil_c87949/f1p0/2703,i1_LQ_Rweevil_c72409/f1p0/1803,i5_LQ_Rweevil_c624/f1p0/5256,i1_LQ_Rweevil_c25705/f1p0/1888,i2_LQ_Rweevil_c5503/f1p65/2335,i3_LQ_Rweevil_c7034/f2p0/3847
GO:0044699	single-organism process	biological_process	0.00026974	0.019161	1248	3203	10026	27707	658	i3_LQ_Rweevil_c25387/f1p0/3974,i2_LQ_Rweevil_c88404/f1p2/2427,i2_LQ_Rweevil_c11827/f1p321/2430,i2_LQ_Rweevil_c48245/f1p72/1969,i1_LQ_Rweevil_c3611/f1p1/1639,i3_LQ_Rweevil_c15241/f1p0/3115,i3_LQ_Rweevil_c20515/f1p0/3677,i4_LQ_Rweevil_c4177/f1p1/4420,i2_LQ_Rweevil_c54553/f1p9/2408,i2_LQ_Rweevil_c25688/f1p13/2199,i4_LQ_Rweevil_c7244/f1p1/4330,i3_LQ_Rweevil_c24046/f1p0/3300,i1_LQ_Rweevil_c12419/f1p1/…	590	i3_HQ_Rweevil_c1505/f7p0/3668,i4_LQ_Rweevil_c4768/f1p19/4198,i3_LQ_Rweevil_c26517/f1p0/3811,i2_LQ_Rweevil_c116774/f1p1/2668,i2_LQ_Rweevil_c109309/f1p7/2632,i2_LQ_Rweevil_c6590/f1p2/2554,i3_LQ_Rweevil_c19966/f1p0/3112,i3_LQ_Rweevil_c33897/f1p0/3372,i3_LQ_Rweevil_c2474/f1p3/3951,i1_HQ_Rweevil_c96923/f8p0/1135,i2_LQ_Rweevil_c115222/f1p4/2301,i1_LQ_Rweevil_c43311/f1p0/1185,i1_LQ_Rweevil_c4839/f1p2/14…
GO:0031109	microtubule polymerization or depolymerization	biological_process	0.00030783	0.020594	13	3203	39	27707	1	i3_LQ_Rweevil_c28485/f1p0/3157	12	i3_LQ_Rweevil_c25836/f1p0/3224,i5_LQ_Rweevil_c3661/f1p0/5446,i3_LQ_Rweevil_c26847/f1p1/3275,i3_LQ_Rweevil_c15181/f1p0/3061,i3_LQ_Rweevil_c15089/f1p1/3036,i3_LQ_Rweevil_c2747/f1p0/3313,i3_LQ_Rweevil_c34058/f1p0/3086,i3_HQ_Rweevil_c37843/f4p8/3049,i2_HQ_Rweevil_c81295/f2p0/2832,i3_LQ_Rweevil_c29801/f1p0/3108,i3_HQ_Rweevil_c40362/f2p0/3048,i3_LQ_Rweevil_c11316/f1p53/3435
GO:0009142	nucleoside triphosphate biosynthetic process	biological_process	0.00031448	0.020594	32	3203	151	27707	23	i1_LQ_Rweevil_c80080/f1p0/1860,i0_LQ_Rweevil_c30759/f1p0/656,i4_LQ_Rweevil_c7548/f1p0/4229,i6_LQ_Rweevil_c825/f1p16/6429,i4_LQ_Rweevil_c13238/f1p0/4044,i3_LQ_Rweevil_c23430/f1p4/3618,i0_LQ_Rweevil_c72444/f1p0/790,i2_LQ_Rweevil_c8751/f1p23/3093,i2_LQ_Rweevil_c25688/f1p13/2199,i1_LQ_Rweevil_c29610/f1p4/1799,i0_LQ_Rweevil_c58216/f1p0/679,i0_LQ_Rweevil_c32571/f1p0/845,i2_HQ_Rweevil_c78235/f2p2/2278,i…	9	i2_HQ_Rweevil_c148481/f56p0/2908,i2_HQ_Rweevil_c73812/f71p8/2921,i6_LQ_Rweevil_c1261/f1p0/6409,i2_LQ_Rweevil_c108641/f1p22/2954,i1_HQ_Rweevil_c121140/f49p0/1116,i1_LQ_Rweevil_c34927/f1p56/1047,i3_LQ_Rweevil_c15089/f1p1/3036,i2_LQ_Rweevil_c87523/f1p5/2582,i2_HQ_Rweevil_c60499/f2p18/3879
GO:0009145	purine nucleoside triphosphate biosynthetic process	biological_process	0.00031448	0.020594	32	3203	151	27707	23	i1_LQ_Rweevil_c34353/f1p0/1023,i2_LQ_Rweevil_c82705/f1p23/2501,i1_LQ_Rweevil_c23034/f1p5/1677,i0_LQ_Rweevil_c37758/f1p0/987,i0_LQ_Rweevil_c26298/f1p0/337,i0_LQ_Rweevil_c91019/f2p0/884,i0_LQ_Rweevil_c23175/f1p7/817,i2_LQ_Rweevil_c25688/f1p13/2199,i2_LQ_Rweevil_c8751/f1p23/3093,i0_LQ_Rweevil_c72444/f1p0/790,i3_LQ_Rweevil_c23430/f1p4/3618,i1_LQ_Rweevil_c80080/f1p0/1860,i0_LQ_Rweevil_c30759/f1p0/656,…	9	i3_LQ_Rweevil_c15089/f1p1/3036,i2_LQ_Rweevil_c87523/f1p5/2582,i2_HQ_Rweevil_c60499/f2p18/3879,i1_LQ_Rweevil_c34927/f1p56/1047,i2_LQ_Rweevil_c108641/f1p22/2954,i1_HQ_Rweevil_c121140/f49p0/1116,i6_LQ_Rweevil_c1261/f1p0/6409,i2_HQ_Rweevil_c73812/f71p8/2921,i2_HQ_Rweevil_c148481/f56p0/2908
GO:0009201	ribonucleoside triphosphate biosynthetic process	biological_process	0.00031448	0.020594	32	3203	151	27707	23	i2_LQ_Rweevil_c58898/f1p0/2662,i2_HQ_Rweevil_c78235/f2p2/2278,i0_LQ_Rweevil_c32571/f1p0/845,i2_LQ_Rweevil_c29924/f1p3/2108,i1_LQ_Rweevil_c5955/f1p0/1950,i1_LQ_Rweevil_c29610/f1p4/1799,i0_LQ_Rweevil_c58216/f1p0/679,i2_LQ_Rweevil_c8751/f1p23/3093,i2_LQ_Rweevil_c25688/f1p13/2199,i4_LQ_Rweevil_c7548/f1p0/4229,i6_LQ_Rweevil_c825/f1p16/6429,i4_LQ_Rweevil_c13238/f1p0/4044,i1_LQ_Rweevil_c80080/f1p0/1860,…	9	i2_HQ_Rweevil_c73812/f71p8/2921,i6_LQ_Rweevil_c1261/f1p0/6409,i2_HQ_Rweevil_c148481/f56p0/2908,i1_LQ_Rweevil_c34927/f1p56/1047,i2_HQ_Rweevil_c60499/f2p18/3879,i2_LQ_Rweevil_c87523/f1p5/2582,i3_LQ_Rweevil_c15089/f1p1/3036,i1_HQ_Rweevil_c121140/f49p0/1116,i2_LQ_Rweevil_c108641/f1p22/2954
GO:0009206	purine ribonucleoside triphosphate biosynthetic process	biological_process	0.00031448	0.020594	32	3203	151	27707	23	i1_LQ_Rweevil_c34353/f1p0/1023,i2_LQ_Rweevil_c82705/f1p23/2501,i1_LQ_Rweevil_c23034/f1p5/1677,i0_LQ_Rweevil_c37758/f1p0/987,i0_LQ_Rweevil_c26298/f1p0/337,i0_LQ_Rweevil_c91019/f2p0/884,i0_LQ_Rweevil_c23175/f1p7/817,i2_LQ_Rweevil_c25688/f1p13/2199,i2_LQ_Rweevil_c8751/f1p23/3093,i3_LQ_Rweevil_c23430/f1p4/3618,i0_LQ_Rweevil_c72444/f1p0/790,i0_LQ_Rweevil_c30759/f1p0/656,i1_LQ_Rweevil_c80080/f1p0/1860,…	9	i3_LQ_Rweevil_c15089/f1p1/3036,i2_LQ_Rweevil_c87523/f1p5/2582,i2_HQ_Rweevil_c60499/f2p18/3879,i1_LQ_Rweevil_c34927/f1p56/1047,i2_LQ_Rweevil_c108641/f1p22/2954,i1_HQ_Rweevil_c121140/f49p0/1116,i2_HQ_Rweevil_c73812/f71p8/2921,i6_LQ_Rweevil_c1261/f1p0/6409,i2_HQ_Rweevil_c148481/f56p0/2908
GO:0015629	actin cytoskeleton	cellular_component	0.00042144	0.026989	66	3203	377	27707	52	i3_LQ_Rweevil_c4701/f1p1/3242,i1_LQ_Rweevil_c6852/f1p0/1890,i3_LQ_Rweevil_c27148/f1p0/3652,i3_LQ_Rweevil_c4186/f1p0/3292,i0_LQ_Rweevil_c14918/f1p0/900,i2_LQ_Rweevil_c19251/f1p2/2262,i1_LQ_Rweevil_c67604/f1p0/1751,i1_LQ_Rweevil_c41303/f1p0/1531,i2_LQ_Rweevil_c135408/f1p7/2494,i2_LQ_Rweevil_c37841/f1p74/2754,i2_LQ_Rweevil_c123785/f1p119/1867,i2_LQ_Rweevil_c83278/f1p42/2770,i2_LQ_Rweevil_c48973/f1p1…	14	i3_LQ_Rweevil_c9525/f1p0/3755,i1_LQ_Rweevil_c52460/f1p0/1638,i2_LQ_Rweevil_c3153/f1p20/2545,i2_LQ_Rweevil_c108261/f1p2/2820,i2_HQ_Rweevil_c31737/f28p1/2264,i6_LQ_Rweevil_c571/f1p0/6118,i3_HQ_Rweevil_c17415/f2p0/3076,i6_LQ_Rweevil_c939/f1p0/6709,i7_LQ_Rweevil_c755/f1p0/7209,i2_HQ_Rweevil_c147752/f24p21/2935,i1_LQ_Rweevil_c5052/f1p0/1620,i2_LQ_Rweevil_c6351/f1p23/2934,i1_HQ_Rweevil_c557/f31p0/1437,…
GO:0016021	integral component of membrane	cellular_component	0.00043195	0.026989	398	3203	2964	27707	176	i2_HQ_Rweevil_c11897/f2p0/2255,i1_LQ_Rweevil_c67716/f1p0/1675,i7_LQ_Rweevil_c565/f1p0/7239,i4_LQ_Rweevil_c4591/f1p0/4277,i5_LQ_Rweevil_c1162/f1p0/5267,i1_LQ_Rweevil_c31076/f1p0/1335,i2_HQ_Rweevil_c147268/f2p3/2179,i3_LQ_Rweevil_c18949/f1p0/3593,i4_LQ_Rweevil_c11799/f1p0/5004,i2_LQ_Rweevil_c83385/f1p3/2850,i2_LQ_Rweevil_c86727/f1p3/2613,i2_HQ_Rweevil_c60720/f3p2/2422,i0_LQ_Rweevil_c4460/f2p0/859,i…	222	i3_LQ_Rweevil_c6635/f1p1/3900,i2_LQ_Rweevil_c82759/f1p10/2281,i4_LQ_Rweevil_c10147/f1p0/4093,i2_LQ_Rweevil_c83478/f1p1/2568,i1_LQ_Rweevil_c24749/f1p0/1156,i1_LQ_Rweevil_c38888/f1p0/1540,i1_HQ_Rweevil_c37687/f25p0/1373,i0_LQ_Rweevil_c8888/f1p0/746,i2_HQ_Rweevil_c1225/f47p7/2430,i2_LQ_Rweevil_c35191/f1p4/2561,i2_LQ_Rweevil_c52506/f42p0/2174,i4_LQ_Rweevil_c11407/f1p3/4884,i2_LQ_Rweevil_c113018/f1p3/…
GO:0005245	voltage-gated calcium channel activity	molecular_function	0.00044435	0.026989	7	3203	14	27707	6	i4_LQ_Rweevil_c4591/f1p0/4277,i1_LQ_Rweevil_c8309/f1p0/1805,i5_LQ_Rweevil_c3209/f1p0/5482,i1_LQ_Rweevil_c8453/f1p2/1955,i6_LQ_Rweevil_c1820/f1p2/6291,i6_LQ_Rweevil_c392/f1p0/6215	1	i2_HQ_Rweevil_c51491/f15p5/2116
GO:0005891	voltage-gated calcium channel complex	cellular_component	0.00044435	0.026989	7	3203	14	27707	6	i1_LQ_Rweevil_c8453/f1p2/1955,i6_LQ_Rweevil_c392/f1p0/6215,i6_LQ_Rweevil_c1820/f1p2/6291,i4_LQ_Rweevil_c4591/f1p0/4277,i1_LQ_Rweevil_c8309/f1p0/1805,i5_LQ_Rweevil_c3209/f1p0/5482	1	i2_HQ_Rweevil_c51491/f15p5/2116
GO:0034704	calcium channel complex	cellular_component	0.00044435	0.026989	7	3203	14	27707	6	i5_LQ_Rweevil_c3209/f1p0/5482,i4_LQ_Rweevil_c4591/f1p0/4277,i1_LQ_Rweevil_c8309/f1p0/1805,i6_LQ_Rweevil_c392/f1p0/6215,i6_LQ_Rweevil_c1820/f1p2/6291,i1_LQ_Rweevil_c8453/f1p2/1955	1	i2_HQ_Rweevil_c51491/f15p5/2116
GO:0031224	intrinsic component of membrane	cellular_component	0.0004522	0.027074	398	3203	2966	27707	176	i4_LQ_Rweevil_c11169/f1p53/4817,i2_LQ_Rweevil_c29492/f1p11/2233,i2_HQ_Rweevil_c126317/f3p4/2408,i2_LQ_Rweevil_c87392/f1p3/2803,i2_LQ_Rweevil_c4736/f1p12/2144,i4_LQ_Rweevil_c2097/f1p8/4133,i1_LQ_Rweevil_c3470/f1p7/1711,i7_LQ_Rweevil_c263/f1p62/7762,i1_LQ_Rweevil_c5843/f1p0/1861,i0_LQ_Rweevil_c10200/f1p12/710,i1_HQ_Rweevil_c2004/f2p0/1711,i3_HQ_Rweevil_c40204/f19p0/3594,i2_HQ_Rweevil_c147268/f2p3/2…	222	i2_LQ_Rweevil_c461/f49p8/2881,i1_LQ_Rweevil_c48436/f1p0/1994,i4_LQ_Rweevil_c5458/f1p0/4730,i2_HQ_Rweevil_c57109/f2p0/2360,i4_LQ_Rweevil_c8501/f1p0/4626,i4_HQ_Rweevil_c13796/f11p0/4042,i1_LQ_Rweevil_c54088/f1p0/1925,i4_LQ_Rweevil_c10140/f1p10/4317,i10_LQ_Rweevil_c45/f1p0/10697,i2_HQ_Rweevil_c2604/f7p1/2858,i0_HQ_Rweevil_c1204/f6p3/814,i4_LQ_Rweevil_c11740/f1p5/4136,i1_LQ_Rweevil_c72267/f1p0/1491,i…
GO:0016614	oxidoreductase activity, acting on CH-OH group of donors	molecular_function	0.00049406	0.029163	57	3203	319	27707	37	i1_LQ_Rweevil_c30675/f1p0/1922,i5_LQ_Rweevil_c4619/f1p0/5451,i1_LQ_Rweevil_c65508/f1p0/1426,i2_LQ_Rweevil_c10100/f1p8/2264,i2_HQ_Rweevil_c12239/f2p0/2191,i1_HQ_Rweevil_c29789/f4p0/1677,i1_HQ_Rweevil_c84590/f5p0/1117,i2_HQ_Rweevil_c148702/f105p8/2248,i1_LQ_Rweevil_c6967/f1p4/1783,i1_LQ_Rweevil_c46092/f1p0/1914,i2_LQ_Rweevil_c4200/f1p0/2428,i1_LQ_Rweevil_c30520/f1p0/1419,i1_HQ_Rweevil_c20209/f2p0/1…	20	i2_LQ_Rweevil_c108645/f1p6/2872,i2_LQ_Rweevil_c50015/f1p1/2112,i2_HQ_Rweevil_c17012/f15p1/2253,i5_LQ_Rweevil_c4909/f1p33/5051,i1_HQ_Rweevil_c52526/f2p0/1825,i3_LQ_Rweevil_c7589/f1p21/3380,i1_LQ_Rweevil_c7756/f1p0/1680,i2_LQ_Rweevil_c26312/f1p8/2200,i2_LQ_Rweevil_c108717/f1p1/2292,i1_LQ_Rweevil_c26791/f1p17/1803,i1_LQ_Rweevil_c6276/f1p0/1731,i4_LQ_Rweevil_c2654/f1p1/4583,i2_HQ_Rweevil_c32609/f42p3…
GO:0044710	single-organism metabolic process	biological_process	0.00063697	0.036569	547	3203	4201	27707	334	i4_LQ_Rweevil_c9702/f1p0/4713,i1_LQ_Rweevil_c52948/f1p0/1812,i3_LQ_Rweevil_c23430/f1p4/3618,i0_HQ_Rweevil_c11487/f2p22/580,i3_LQ_Rweevil_c15131/f1p0/3019,i2_LQ_Rweevil_c4200/f1p0/2428,i2_HQ_Rweevil_c21080/f2p0/2791,i3_LQ_Rweevil_c18069/f1p0/3571,i2_LQ_Rweevil_c85075/f1p85/3024,i2_LQ_Rweevil_c20838/f1p3/2972,i1_LQ_Rweevil_c29610/f1p4/1799,i4_LQ_Rweevil_c4192/f1p0/4642,i2_LQ_Rweevil_c58898/f1p0/266…	213	i1_LQ_Rweevil_c56064/f3p2/1035,i2_LQ_Rweevil_c78668/f1p4/2430,i1_LQ_Rweevil_c26791/f1p17/1803,i2_LQ_Rweevil_c85235/f1p3/2850,i2_LQ_Rweevil_c19512/f1p3/2852,i2_LQ_Rweevil_c132564/f1p2/2835,i1_LQ_Rweevil_c16108/f1p0/1088,i2_LQ_Rweevil_c98093/f1p3/1910,i1_LQ_Rweevil_c147953/f1p13/1002,i3_LQ_Rweevil_c28594/f1p0/3183,i1_HQ_Rweevil_c32966/f2p0/1096,i3_HQ_Rweevil_c15796/f2p0/3085,i3_LQ_Rweevil_c20436/f1…
GO:0003796	lysozyme activity	molecular_function	0.00066471	0.037247	4	3203	5	27707	0		4	i0_HQ_Rweevil_c20170/f11p0/839,i0_LQ_Rweevil_c15452/f1p0/544,i0_LQ_Rweevil_c3133/f1p0/935,i2_LQ_Rweevil_c3672/f1p15/2397
GO:0015098	molybdate ion transmembrane transporter activity	molecular_function	0.00067545	0.037247	6	3203	11	27707	2	i4_LQ_Rweevil_c8408/f1p3/4120,i1_HQ_Rweevil_c1753/f10p3/1709	4	i2_LQ_Rweevil_c61461/f1p1/2321,i5_LQ_Rweevil_c1930/f1p13/5305,i3_LQ_Rweevil_c18759/f1p0/3730,i3_LQ_Rweevil_c6635/f1p1/3900
GO:0015689	molybdate ion transport	biological_process	0.00067545	0.037247	6	3203	11	27707	2	i1_HQ_Rweevil_c1753/f10p3/1709,i4_LQ_Rweevil_c8408/f1p3/4120	4	i3_LQ_Rweevil_c6635/f1p1/3900,i3_LQ_Rweevil_c18759/f1p0/3730,i5_LQ_Rweevil_c1930/f1p13/5305,i2_LQ_Rweevil_c61461/f1p1/2321
GO:0016705	oxidoreductase activity, acting on paired donors, with incorporation or reduction of molecular oxygen	molecular_function	0.00070246	0.038005	46	3203	246	27707	37	i4_LQ_Rweevil_c7825/f1p6/4210,i2_HQ_Rweevil_c102860/f2p3/2222,i1_LQ_Rweevil_c31828/f1p6/1815,i1_LQ_Rweevil_c68969/f1p0/1581,i1_LQ_Rweevil_c8754/f1p0/1885,i1_LQ_Rweevil_c76119/f1p0/1602,i1_HQ_Rweevil_c2301/f6p2/1807,i2_LQ_Rweevil_c20838/f1p3/2972,i11_LQ_Rweevil_c18/f1p0/11715,i3_LQ_Rweevil_c8984/f1p0/3801,i2_LQ_Rweevil_c21501/f1p2/2308,i2_HQ_Rweevil_c61916/f2p6/2401,i2_LQ_Rweevil_c132445/f1p6/2128…	9	i5_LQ_Rweevil_c624/f1p0/5256,i2_HQ_Rweevil_c147993/f129p15/2433,i2_LQ_Rweevil_c5503/f1p65/2335,i1_LQ_Rweevil_c25705/f1p0/1888,i4_LQ_Rweevil_c4993/f1p0/4393,i2_LQ_Rweevil_c95933/f1p3/2119,i1_HQ_Rweevil_c67115/f2p0/1678,i1_LQ_Rweevil_c72409/f1p0/1803,i2_LQ_Rweevil_c87949/f1p0/2703
GO:0004888	transmembrane signaling receptor activity	molecular_function	0.00070733	0.038005	58	3203	328	27707	28	i4_LQ_Rweevil_c10367/f1p0/4292,i2_LQ_Rweevil_c135784/f1p3/2232,i1_HQ_Rweevil_c4182/f3p3/1617,i3_LQ_Rweevil_c18168/f1p4/3895,i3_LQ_Rweevil_c9325/f1p0/3547,i4_LQ_Rweevil_c7828/f1p0/4820,i3_LQ_Rweevil_c6355/f1p0/3354,i4_LQ_Rweevil_c9219/f1p0/4203,i3_LQ_Rweevil_c19469/f1p31/3545,i3_LQ_Rweevil_c17834/f1p0/3227,i5_LQ_Rweevil_c2933/f1p1/5226,i2_HQ_Rweevil_c34506/f2p1/2172,i3_LQ_Rweevil_c21450/f1p1/3357,…	30	i1_LQ_Rweevil_c54088/f1p0/1925,i2_LQ_Rweevil_c142283/f1p2/2090,i5_LQ_Rweevil_c4591/f1p0/5270,i5_LQ_Rweevil_c4273/f1p1/5359,i2_LQ_Rweevil_c106904/f1p31/3031,i1_LQ_Rweevil_c25705/f1p0/1888,i5_LQ_Rweevil_c4127/f1p3/5542,i3_LQ_Rweevil_c2474/f1p3/3951,i8_LQ_Rweevil_c516/f1p0/8024,i1_LQ_Rweevil_c77191/f1p3/1206,i3_LQ_Rweevil_c9204/f1p0/3555,i4_LQ_Rweevil_c5458/f1p0/4730,i1_LQ_Rweevil_c68499/f1p0/1678,i…
GO:0034703	cation channel complex	cellular_component	0.00075346	0.039972	7	3203	15	27707	6	i1_LQ_Rweevil_c8453/f1p2/1955,i6_LQ_Rweevil_c392/f1p0/6215,i6_LQ_Rweevil_c1820/f1p2/6291,i4_LQ_Rweevil_c4591/f1p0/4277,i1_LQ_Rweevil_c8309/f1p0/1805,i5_LQ_Rweevil_c3209/f1p0/5482	1	i2_HQ_Rweevil_c51491/f15p5/2116
GO:0009678	hydrogen-translocating pyrophosphatase activity	molecular_function	0.00082711	0.04333	4	3203	5	27707	2	i2_LQ_Rweevil_c134158/f1p90/2248,i2_LQ_Rweevil_c69306/f1p5/1985	2	i2_HQ_Rweevil_c14224/f19p5/2457,i2_LQ_Rweevil_c106820/f1p5/2409
GO:0044275	cellular carbohydrate catabolic process	biological_process	0.00089184	0.046145	9	3203	24	27707	0		9	i3_LQ_Rweevil_c27969/f1p0/3702,i2_HQ_Rweevil_c47113/f2p13/2048,i2_LQ_Rweevil_c49875/f1p14/2095,i2_LQ_Rweevil_c110094/f1p13/2480,i1_LQ_Rweevil_c91074/f1p0/1127,i1_LQ_Rweevil_c16810/f1p0/1069,i7_LQ_Rweevil_c453/f1p0/7423,i2_LQ_Rweevil_c29757/f1p13/2068,i2_LQ_Rweevil_c69977/f1p13/2074
GO:0009060	aerobic respiration	biological_process	0.00094442	0.048269	18	3203	72	27707	17	i1_LQ_Rweevil_c34860/f1p0/1051,i1_LQ_Rweevil_c28835/f1p0/1262,i1_LQ_Rweevil_c5098/f1p0/1686,i3_LQ_Rweevil_c13629/f1p14/3821,i4_LQ_Rweevil_c2968/f1p0/4632,i2_LQ_Rweevil_c27094/f1p302/2312,i1_LQ_Rweevil_c4310/f1p0/1312,i1_LQ_Rweevil_c10926/f1p0/1868,i1_LQ_Rweevil_c68696/f1p0/1567,i1_HQ_Rweevil_c29789/f4p0/1677,i2_LQ_Rweevil_c11827/f1p321/2430,i3_LQ_Rweevil_c24046/f1p0/3300,i0_LQ_Rweevil_c28504/f1p0…	1	i2_LQ_Rweevil_c42540/f1p4/2402
GO:0004872	receptor activity	molecular_function	0.00095839	0.048393	69	3203	410	27707	30	i3_LQ_Rweevil_c14969/f1p0/3036,i2_LQ_Rweevil_c5289/f1p3/2973,i1_LQ_Rweevil_c81602/f1p0/1701,i3_HQ_Rweevil_c31965/f26p0/3474,i3_LQ_Rweevil_c14536/f1p3/3055,i4_LQ_Rweevil_c5875/f1p0/4765,i4_LQ_Rweevil_c7828/f1p0/4820,i3_LQ_Rweevil_c6355/f1p0/3354,i3_LQ_Rweevil_c19469/f1p31/3545,i3_LQ_Rweevil_c21450/f1p1/3357,i1_HQ_Rweevil_c4182/f3p3/1617,i2_LQ_Rweevil_c135784/f1p3/2232,i3_LQ_Rweevil_c18168/f1p4/389…	39	i4_LQ_Rweevil_c9518/f1p0/4565,i2_HQ_Rweevil_c17355/f4p2/2789,i3_LQ_Rweevil_c42008/f1p39/3589,i3_LQ_Rweevil_c18886/f1p24/3536,i3_LQ_Rweevil_c22820/f1p0/3096,i1_LQ_Rweevil_c42611/f1p14/1940,i4_LQ_Rweevil_c6993/f1p184/4290,i4_LQ_Rweevil_c7404/f1p0/4653,i0_HQ_Rweevil_c881/f7p5/919,i8_LQ_Rweevil_c516/f1p0/8024,i1_HQ_Rweevil_c8704/f2p11/1812,i2_HQ_Rweevil_c99634/f29p3/2185,i1_LQ_Rweevil_c68499/f1p0/167…
GO:0009124	nucleoside monophosphate biosynthetic process	biological_process	0.001042	0.050195	33	3203	167	27707	24	i2_LQ_Rweevil_c82705/f1p23/2501,i2_LQ_Rweevil_c14630/f1p6/2131,i1_LQ_Rweevil_c34353/f1p0/1023,i0_LQ_Rweevil_c23175/f1p7/817,i1_LQ_Rweevil_c23034/f1p5/1677,i0_LQ_Rweevil_c37758/f1p0/987,i0_LQ_Rweevil_c26298/f1p0/337,i0_LQ_Rweevil_c91019/f2p0/884,i3_LQ_Rweevil_c23430/f1p4/3618,i0_LQ_Rweevil_c72444/f1p0/790,i1_LQ_Rweevil_c80080/f1p0/1860,i0_LQ_Rweevil_c30759/f1p0/656,i6_LQ_Rweevil_c825/f1p16/6429,i4…	9	i2_LQ_Rweevil_c108641/f1p22/2954,i1_HQ_Rweevil_c121140/f49p0/1116,i3_LQ_Rweevil_c15089/f1p1/3036,i2_LQ_Rweevil_c87523/f1p5/2582,i2_HQ_Rweevil_c60499/f2p18/3879,i1_LQ_Rweevil_c34927/f1p56/1047,i2_HQ_Rweevil_c148481/f56p0/2908,i2_HQ_Rweevil_c73812/f71p8/2921,i6_LQ_Rweevil_c1261/f1p0/6409
GO:0009127	purine nucleoside monophosphate biosynthetic process	biological_process	0.001042	0.050195	33	3203	167	27707	24	i0_LQ_Rweevil_c23175/f1p7/817,i1_LQ_Rweevil_c23034/f1p5/1677,i0_LQ_Rweevil_c26298/f1p0/337,i0_LQ_Rweevil_c91019/f2p0/884,i0_LQ_Rweevil_c37758/f1p0/987,i2_LQ_Rweevil_c82705/f1p23/2501,i2_LQ_Rweevil_c14630/f1p6/2131,i1_LQ_Rweevil_c34353/f1p0/1023,i0_LQ_Rweevil_c58216/f1p0/679,i1_LQ_Rweevil_c29610/f1p4/1799,i2_LQ_Rweevil_c29924/f1p3/2108,i1_LQ_Rweevil_c5955/f1p0/1950,i2_HQ_Rweevil_c78235/f2p2/2278,i…	9	i1_HQ_Rweevil_c121140/f49p0/1116,i2_LQ_Rweevil_c108641/f1p22/2954,i2_HQ_Rweevil_c60499/f2p18/3879,i2_LQ_Rweevil_c87523/f1p5/2582,i3_LQ_Rweevil_c15089/f1p1/3036,i1_LQ_Rweevil_c34927/f1p56/1047,i2_HQ_Rweevil_c148481/f56p0/2908,i2_HQ_Rweevil_c73812/f71p8/2921,i6_LQ_Rweevil_c1261/f1p0/6409
GO:0009156	ribonucleoside monophosphate biosynthetic process	biological_process	0.001042	0.050195	33	3203	167	27707	24	i1_LQ_Rweevil_c34353/f1p0/1023,i2_LQ_Rweevil_c14630/f1p6/2131,i2_LQ_Rweevil_c82705/f1p23/2501,i0_LQ_Rweevil_c37758/f1p0/987,i0_LQ_Rweevil_c26298/f1p0/337,i0_LQ_Rweevil_c91019/f2p0/884,i1_LQ_Rweevil_c23034/f1p5/1677,i0_LQ_Rweevil_c23175/f1p7/817,i2_LQ_Rweevil_c8751/f1p23/3093,i2_LQ_Rweevil_c25688/f1p13/2199,i0_LQ_Rweevil_c30759/f1p0/656,i1_LQ_Rweevil_c80080/f1p0/1860,i4_LQ_Rweevil_c13238/f1p0/4044…	9	i1_LQ_Rweevil_c34927/f1p56/1047,i3_LQ_Rweevil_c15089/f1p1/3036,i2_HQ_Rweevil_c60499/f2p18/3879,i2_LQ_Rweevil_c87523/f1p5/2582,i2_LQ_Rweevil_c108641/f1p22/2954,i1_HQ_Rweevil_c121140/f49p0/1116,i6_LQ_Rweevil_c1261/f1p0/6409,i2_HQ_Rweevil_c73812/f71p8/2921,i2_HQ_Rweevil_c148481/f56p0/2908
GO:0009168	purine ribonucleoside monophosphate biosynthetic process	biological_process	0.001042	0.050195	33	3203	167	27707	24	i0_LQ_Rweevil_c23175/f1p7/817,i0_LQ_Rweevil_c26298/f1p0/337,i0_LQ_Rweevil_c91019/f2p0/884,i0_LQ_Rweevil_c37758/f1p0/987,i1_LQ_Rweevil_c23034/f1p5/1677,i2_LQ_Rweevil_c82705/f1p23/2501,i2_LQ_Rweevil_c14630/f1p6/2131,i1_LQ_Rweevil_c34353/f1p0/1023,i1_LQ_Rweevil_c29610/f1p4/1799,i0_LQ_Rweevil_c58216/f1p0/679,i2_HQ_Rweevil_c78235/f2p2/2278,i2_LQ_Rweevil_c58898/f1p0/2662,i0_LQ_Rweevil_c32571/f1p0/845,i…	9	i1_HQ_Rweevil_c121140/f49p0/1116,i2_LQ_Rweevil_c108641/f1p22/2954,i1_LQ_Rweevil_c34927/f1p56/1047,i2_HQ_Rweevil_c60499/f2p18/3879,i2_LQ_Rweevil_c87523/f1p5/2582,i3_LQ_Rweevil_c15089/f1p1/3036,i2_HQ_Rweevil_c148481/f56p0/2908,i2_HQ_Rweevil_c73812/f71p8/2921,i6_LQ_Rweevil_c1261/f1p0/6409
GO:0006812	cation transport	biological_process	0.0010699	0.050953	139	3203	939	27707	90	i2_LQ_Rweevil_c29924/f1p3/2108,i2_LQ_Rweevil_c134158/f1p90/2248,i2_LQ_Rweevil_c69306/f1p5/1985,i5_LQ_Rweevil_c615/f1p0/5681,i3_LQ_Rweevil_c36265/f1p0/3285,i4_LQ_Rweevil_c4609/f1p0/4755,i0_LQ_Rweevil_c58216/f1p0/679,i2_LQ_Rweevil_c8751/f1p23/3093,i1_LQ_Rweevil_c8453/f1p2/1955,i1_LQ_Rweevil_c6630/f1p0/1720,i1_LQ_Rweevil_c7216/f1p0/1761,i6_LQ_Rweevil_c825/f1p16/6429,i2_LQ_Rweevil_c13338/f1p4/2300,i6…	49	i1_LQ_Rweevil_c53458/f1p0/1733,i4_LQ_Rweevil_c7820/f1p0/4446,i3_LQ_Rweevil_c19653/f1p0/3960,i2_HQ_Rweevil_c39135/f2p9/2771,i2_LQ_Rweevil_c57578/f1p1/2936,i2_LQ_Rweevil_c22765/f1p28/2229,i0_LQ_Rweevil_c22873/f1p0/943,i1_LQ_Rweevil_c77054/f1p0/1592,i2_LQ_Rweevil_c37484/f1p13/2963,i1_HQ_Rweevil_c51472/f2p0/1636,i3_LQ_Rweevil_c25589/f1p0/3141,i2_HQ_Rweevil_c51491/f15p5/2116,i2_LQ_Rweevil_c108641/f1p2…
GO:0051179	localization	biological_process	0.0011651	0.054866	548	3203	4225	27707	272	i1_LQ_Rweevil_c68573/f1p4/1167,i1_LQ_Rweevil_c822/f16p0/1376,i7_LQ_Rweevil_c551/f1p0/7327,i1_LQ_Rweevil_c50155/f1p1/1754,i8_LQ_Rweevil_c244/f1p0/8473,i0_LQ_Rweevil_c27279/f1p3/610,i4_HQ_Rweevil_c1289/f3p0/4466,i0_HQ_Rweevil_c989/f12p0/562,i5_LQ_Rweevil_c2613/f1p0/5568,i2_LQ_Rweevil_c55798/f1p7/2348,i3_LQ_Rweevil_c21694/f1p0/3310,i2_LQ_Rweevil_c108130/f1p1/2532,i2_LQ_Rweevil_c111209/f1p1/2894,i1_L…	276	i3_HQ_Rweevil_c1882/f5p0/3217,i3_LQ_Rweevil_c3367/f1p1/3445,i3_HQ_Rweevil_c1690/f6p0/3777,i2_LQ_Rweevil_c111421/f1p10/2449,i1_HQ_Rweevil_c66917/f3p0/1462,i2_HQ_Rweevil_c126113/f13p1/2521,i3_HQ_Rweevil_c32084/f3p6/3128,i3_HQ_Rweevil_c1557/f5p0/3841,i2_LQ_Rweevil_c63508/f1p2/2279,i2_HQ_Rweevil_c147570/f5p1/2123,i2_LQ_Rweevil_c52112/f1p1/2620,i2_HQ_Rweevil_c20636/f4p0/2142,i3_HQ_Rweevil_c39921/f2p0/…
GO:0034702	ion channel complex	cellular_component	0.0012108	0.056381	7	3203	16	27707	6	i1_LQ_Rweevil_c8453/f1p2/1955,i6_LQ_Rweevil_c1820/f1p2/6291,i6_LQ_Rweevil_c392/f1p0/6215,i4_LQ_Rweevil_c4591/f1p0/4277,i1_LQ_Rweevil_c8309/f1p0/1805,i5_LQ_Rweevil_c3209/f1p0/5482	1	i2_HQ_Rweevil_c51491/f15p5/2116
GO:0038023	signaling receptor activity	molecular_function	0.0013188	0.060736	63	3203	372	27707	29	i4_LQ_Rweevil_c10367/f1p0/4292,i1_HQ_Rweevil_c4182/f3p3/1617,i2_LQ_Rweevil_c135784/f1p3/2232,i3_LQ_Rweevil_c9325/f1p0/3547,i3_LQ_Rweevil_c18168/f1p4/3895,i3_LQ_Rweevil_c6355/f1p0/3354,i4_LQ_Rweevil_c7828/f1p0/4820,i3_LQ_Rweevil_c17834/f1p0/3227,i3_LQ_Rweevil_c19469/f1p31/3545,i4_LQ_Rweevil_c9219/f1p0/4203,i3_LQ_Rweevil_c21450/f1p1/3357,i2_HQ_Rweevil_c34506/f2p1/2172,i5_LQ_Rweevil_c2933/f1p1/5226,…	34	i1_LQ_Rweevil_c54088/f1p0/1925,i2_LQ_Rweevil_c142283/f1p2/2090,i5_LQ_Rweevil_c4273/f1p1/5359,i5_LQ_Rweevil_c4591/f1p0/5270,i2_LQ_Rweevil_c106904/f1p31/3031,i3_LQ_Rweevil_c2474/f1p3/3951,i5_LQ_Rweevil_c4127/f1p3/5542,i1_LQ_Rweevil_c25705/f1p0/1888,i2_LQ_Rweevil_c6590/f1p2/2554,i8_LQ_Rweevil_c516/f1p0/8024,i2_HQ_Rweevil_c2440/f8p1/2331,i4_LQ_Rweevil_c6574/f1p0/4494,i2_LQ_Rweevil_c57740/f1p4/2724,i1…
GO:0006810	transport	biological_process	0.0013435	0.061204	520	3203	4001	27707	258	i2_LQ_Rweevil_c123320/f1p2/2163,i9_LQ_Rweevil_c319/f1p0/9029,i6_LQ_Rweevil_c1820/f1p2/6291,i1_LQ_Rweevil_c15027/f1p9/1153,i1_HQ_Rweevil_c4652/f2p218/1216,i2_LQ_Rweevil_c60831/f1p216/2225,i2_HQ_Rweevil_c27349/f3p0/2457,i0_HQ_Rweevil_c21555/f2p20/734,i2_HQ_Rweevil_c126767/f4p0/2515,i2_HQ_Rweevil_c9166/f4p0/2604,i4_LQ_Rweevil_c4609/f1p0/4755,i3_LQ_Rweevil_c36265/f1p0/3285,i2_LQ_Rweevil_c82033/f1p1/2…	262	i3_HQ_Rweevil_c40362/f2p0/3048,i1_LQ_Rweevil_c85090/f3p0/1091,i2_HQ_Rweevil_c39135/f2p9/2771,i2_LQ_Rweevil_c104312/f1p2/2316,i2_LQ_Rweevil_c161817/f1p2/2043,i1_LQ_Rweevil_c62938/f1p0/1107,i3_HQ_Rweevil_c31877/f3p0/3051,i3_LQ_Rweevil_c20422/f1p1/3553,i2_HQ_Rweevil_c139473/f2p8/2032,i3_HQ_Rweevil_c3191/f2p0/3179,i2_LQ_Rweevil_c69462/f1p2/2038,i4_LQ_Rweevil_c7820/f1p0/4446,i2_HQ_Rweevil_c59493/f4p0/…
GO:0051234	establishment of localization	biological_process	0.0016272	0.07333	522	3203	4027	27707	258	i2_HQ_Rweevil_c128926/f2p4/2512,i2_LQ_Rweevil_c63058/f1p19/2866,i3_LQ_Rweevil_c14621/f1p14/3017,i1_LQ_Rweevil_c7708/f1p18/1527,i6_LQ_Rweevil_c412/f1p7/6586,i5_HQ_Rweevil_c284/f4p0/5543,i3_LQ_Rweevil_c28201/f1p0/3712,i3_LQ_Rweevil_c7653/f1p0/3118,i5_HQ_Rweevil_c276/f4p0/5541,i2_LQ_Rweevil_c108705/f1p2/2381,i3_LQ_Rweevil_c28280/f1p0/3654,i2_LQ_Rweevil_c54820/f1p5/2024,i3_LQ_Rweevil_c28239/f1p0/3371…	264	i4_LQ_Rweevil_c14240/f1p0/4337,i2_LQ_Rweevil_c164071/f1p6/1987,i3_LQ_Rweevil_c26148/f1p0/3082,i5_LQ_Rweevil_c3100/f1p3/5519,i2_LQ_Rweevil_c3096/f1p7/2616,i2_LQ_Rweevil_c88015/f1p8/2583,i3_HQ_Rweevil_c40348/f10p10/3118,i2_LQ_Rweevil_c6351/f1p23/2934,i3_LQ_Rweevil_c18759/f1p0/3730,i2_LQ_Rweevil_c19024/f1p5/2744,i3_HQ_Rweevil_c2371/f3p4/3348,i4_LQ_Rweevil_c11819/f1p0/4482,i2_HQ_Rweevil_c74051/f16p4/…
GO:0004427	inorganic diphosphatase activity	molecular_function	0.0016918	0.075431	5	3203	9	27707	3	i2_LQ_Rweevil_c69306/f1p5/1985,i2_LQ_Rweevil_c134158/f1p90/2248,i2_LQ_Rweevil_c108922/f1p558/2956	2	i2_HQ_Rweevil_c14224/f19p5/2457,i2_LQ_Rweevil_c106820/f1p5/2409
GO:0022843	voltage-gated cation channel activity	molecular_function	0.0018467	0.08147	10	3203	31	27707	9	i6_LQ_Rweevil_c1820/f1p2/6291,i3_LQ_Rweevil_c36265/f1p0/3285,i6_LQ_Rweevil_c392/f1p0/6215,i1_LQ_Rweevil_c8309/f1p0/1805,i3_LQ_Rweevil_c33769/f1p0/3187,i5_LQ_Rweevil_c3209/f1p0/5482,i1_LQ_Rweevil_c8453/f1p2/1955,i4_LQ_Rweevil_c4591/f1p0/4277,i3_HQ_Rweevil_c1899/f3p3/3226	1	i2_HQ_Rweevil_c51491/f15p5/2116
GO:0006164	purine nucleotide biosynthetic process	biological_process	0.0020433	0.089201	41	3203	228	27707	28	i0_LQ_Rweevil_c58216/f1p0/679,i1_LQ_Rweevil_c7342/f1p0/1781,i1_LQ_Rweevil_c29610/f1p4/1799,i3_LQ_Rweevil_c25387/f1p0/3974,i2_LQ_Rweevil_c29924/f1p3/2108,i1_LQ_Rweevil_c5955/f1p0/1950,i2_HQ_Rweevil_c78235/f2p2/2278,i2_LQ_Rweevil_c58898/f1p0/2662,i0_LQ_Rweevil_c32571/f1p0/845,i3_LQ_Rweevil_c23430/f1p4/3618,i0_LQ_Rweevil_c72444/f1p0/790,i4_LQ_Rweevil_c7548/f1p0/4229,i6_LQ_Rweevil_c825/f1p16/6429,i4_…	13	i2_HQ_Rweevil_c148481/f56p0/2908,i2_HQ_Rweevil_c73812/f71p8/2921,i6_LQ_Rweevil_c1261/f1p0/6409,i2_LQ_Rweevil_c71487/f1p3/2094,i2_LQ_Rweevil_c115091/f1p20/2356,i1_HQ_Rweevil_c121140/f49p0/1116,i2_LQ_Rweevil_c108641/f1p22/2954,i2_HQ_Rweevil_c60499/f2p18/3879,i2_LQ_Rweevil_c87523/f1p5/2582,i2_LQ_Rweevil_c104991/f1p4/2181,i3_LQ_Rweevil_c15089/f1p1/3036,i1_LQ_Rweevil_c124727/f1p0/1327,i1_LQ_Rweevil_c3…
GO:0060589	nucleoside-triphosphatase regulator activity	molecular_function	0.002102	0.09082	32	3203	164	27707	6	i0_LQ_Rweevil_c52297/f1p0/776,i4_LQ_Rweevil_c2959/f1p3/4234,i1_LQ_Rweevil_c14992/f1p10/1123,i2_LQ_Rweevil_c61004/f1p7/2613,i2_LQ_Rweevil_c108705/f1p2/2381,i1_LQ_Rweevil_c46000/f1p0/2003	26	i3_LQ_Rweevil_c28594/f1p0/3183,i0_LQ_Rweevil_c7383/f1p0/827,i1_LQ_Rweevil_c81808/f1p31/1629,i5_LQ_Rweevil_c3800/f1p0/5358,i3_LQ_Rweevil_c26468/f1p12/3522,i4_HQ_Rweevil_c1421/f3p0/4115,i0_LQ_Rweevil_c47751/f3p0/849,i2_LQ_Rweevil_c115091/f1p20/2356,i7_LQ_Rweevil_c1023/f1p0/7115,i2_LQ_Rweevil_c45279/f1p3/1962,i0_LQ_Rweevil_c23030/f1p401/816,i4_LQ_Rweevil_c8653/f1p0/4134,i2_LQ_Rweevil_c43754/f1p0/299…
GO:0009055	electron carrier activity	molecular_function	0.0021886	0.093595	41	3203	230	27707	32	i3_LQ_Rweevil_c13629/f1p14/3821,i0_HQ_Rweevil_c71790/f5p0/583,i1_LQ_Rweevil_c34353/f1p0/1023,i4_LQ_Rweevil_c2968/f1p0/4632,i1_LQ_Rweevil_c34860/f1p0/1051,i1_LQ_Rweevil_c5987/f1p0/1730,i4_LQ_Rweevil_c8408/f1p3/4120,i0_LQ_Rweevil_c49112/f1p0/469,i1_LQ_Rweevil_c68696/f1p0/1567,i3_LQ_Rweevil_c24046/f1p0/3300,i7_LQ_Rweevil_c565/f1p0/7239,i1_LQ_Rweevil_c81206/f1p0/1743,i1_LQ_Rweevil_c118718/f1p4/1058,i…	9	i2_HQ_Rweevil_c147213/f17p9/2750,i1_LQ_Rweevil_c42611/f1p14/1940,i2_LQ_Rweevil_c35122/f1p3/2797,i2_LQ_Rweevil_c77272/f1p3/2480,i2_LQ_Rweevil_c42540/f1p4/2402,i0_LQ_Rweevil_c880/f12p0/931,i2_HQ_Rweevil_c2440/f8p1/2331,i1_HQ_Rweevil_c20431/f7p0/1701,i2_LQ_Rweevil_c19269/f1p15/2936
GO:0042157	lipoprotein metabolic process	biological_process	0.0026382	0.10961	28	3203	141	27707	13	i2_HQ_Rweevil_c126077/f4p1/2993,i4_LQ_Rweevil_c9100/f1p0/4526,i4_HQ_Rweevil_c1587/f2p0/4333,i2_LQ_Rweevil_c56369/f1p8/2079,i2_LQ_Rweevil_c63058/f1p19/2866,i2_LQ_Rweevil_c42813/f1p13/3584,i2_LQ_Rweevil_c110995/f1p2/2222,i0_LQ_Rweevil_c52297/f1p0/776,i2_LQ_Rweevil_c113912/f1p0/2361,i1_LQ_Rweevil_c14992/f1p10/1123,i4_LQ_Rweevil_c11169/f1p53/4817,i3_HQ_Rweevil_c17573/f2p2/3639,i2_LQ_Rweevil_c82705/f1…	15	i0_LQ_Rweevil_c52386/f1p0/778,i3_LQ_Rweevil_c34058/f1p0/3086,i4_HQ_Rweevil_c1117/f4p0/4280,i3_LQ_Rweevil_c26847/f1p1/3275,i0_LQ_Rweevil_c27970/f1p0/756,i3_HQ_Rweevil_c40362/f2p0/3048,i2_HQ_Rweevil_c117871/f4p2/2084,i2_HQ_Rweevil_c81295/f2p0/2832,i3_HQ_Rweevil_c37843/f4p8/3049,i4_HQ_Rweevil_c12387/f2p6/4055,i3_LQ_Rweevil_c25836/f1p0/3224,i2_LQ_Rweevil_c65535/f1p0/2358,i5_LQ_Rweevil_c3840/f1p0/5104…
GO:0006811	ion transport	biological_process	0.0026415	0.10961	186	3203	1328	27707	117	i3_LQ_Rweevil_c7114/f1p0/3398,i10_LQ_Rweevil_c43/f1p0/10942,i0_LQ_Rweevil_c23175/f1p7/817,i3_LQ_Rweevil_c33749/f1p0/3389,i2_LQ_Rweevil_c36370/f1p27/2340,i4_HQ_Rweevil_c1588/f2p0/4834,i2_LQ_Rweevil_c56369/f1p8/2079,i0_LQ_Rweevil_c37758/f1p0/987,i0_LQ_Rweevil_c91019/f2p0/884,i3_LQ_Rweevil_c3897/f1p0/3428,i3_LQ_Rweevil_c41812/f1p0/3663,i3_LQ_Rweevil_c26356/f1p0/3096,i6_LQ_Rweevil_c2216/f1p7/6084,i2_…	69	i1_HQ_Rweevil_c2167/f8p0/1791,i2_LQ_Rweevil_c37114/f1p136/2538,i1_HQ_Rweevil_c121140/f49p0/1116,i3_LQ_Rweevil_c15089/f1p1/3036,i2_LQ_Rweevil_c87523/f1p5/2582,i2_HQ_Rweevil_c60499/f2p18/3879,i2_LQ_Rweevil_c26338/f1p0/2901,i1_HQ_Rweevil_c44725/f2p0/1516,i1_LQ_Rweevil_c120821/f1p3/1109,i3_LQ_Rweevil_c12587/f1p0/3810,i2_LQ_Rweevil_c77177/f1p2/3010,i2_LQ_Rweevil_c13646/f1p3/2650,i2_LQ_Rweevil_c106820/…
GO:0003993	acid phosphatase activity	molecular_function	0.0027337	0.11232	34	3203	178	27707	17	i5_LQ_Rweevil_c646/f1p0/5222,i4_LQ_Rweevil_c9189/f1p0/4565,i3_HQ_Rweevil_c1268/f4p0/3447,i4_LQ_Rweevil_c3149/f1p4/4116,i2_LQ_Rweevil_c11291/f1p35/2096,i3_LQ_Rweevil_c35995/f1p0/3092,i8_HQ_Rweevil_c15/f2p0/8531,i7_LQ_Rweevil_c915/f1p0/7979,i2_LQ_Rweevil_c54820/f1p5/2024,i1_LQ_Rweevil_c22629/f1p0/1596,i2_HQ_Rweevil_c147050/f4p0/2215,i7_LQ_Rweevil_c276/f1p0/7630,i4_HQ_Rweevil_c13907/f4p0/4488,i3_LQ_…	17	i2_LQ_Rweevil_c58333/f1p1/2484,i5_HQ_Rweevil_c5322/f2p0/5088,i3_LQ_Rweevil_c22464/f1p56/3446,i4_LQ_Rweevil_c9518/f1p0/4565,i4_LQ_Rweevil_c10745/f1p0/4938,i4_LQ_Rweevil_c12120/f1p0/4679,i3_LQ_Rweevil_c25274/f1p5/3943,i3_LQ_Rweevil_c22820/f1p0/3096,i1_HQ_Rweevil_c20870/f2p0/1270,i1_HQ_Rweevil_c63950/f5p0/1866,i4_HQ_Rweevil_c13689/f5p5/4609,i4_LQ_Rweevil_c2674/f1p0/4141,i2_LQ_Rweevil_c84323/f1p2/210…
GO:0015077	monovalent inorganic cation transmembrane transporter activity	molecular_function	0.0027753	0.11292	80	3203	517	27707	59	i0_LQ_Rweevil_c3572/f1p0/757,i3_LQ_Rweevil_c36265/f1p0/3285,i4_LQ_Rweevil_c3157/f1p0/4835,i2_LQ_Rweevil_c11827/f1p321/2430,i2_HQ_Rweevil_c78235/f2p2/2278,i2_HQ_Rweevil_c50762/f23p5/2889,i2_LQ_Rweevil_c55224/f1p4/2604,i6_LQ_Rweevil_c825/f1p16/6429,i1_LQ_Rweevil_c145427/f1p0/1018,i4_LQ_Rweevil_c13238/f1p0/4044,i3_HQ_Rweevil_c19173/f2p0/3599,i0_LQ_Rweevil_c30759/f1p0/656,i2_LQ_Rweevil_c8751/f1p23/30…	21	i3_LQ_Rweevil_c12587/f1p0/3810,i2_LQ_Rweevil_c77177/f1p2/3010,i2_LQ_Rweevil_c59048/f1p0/2825,i1_LQ_Rweevil_c73447/f1p5/1598,i2_LQ_Rweevil_c57578/f1p1/2936,i2_LQ_Rweevil_c37114/f1p136/2538,i1_HQ_Rweevil_c121140/f49p0/1116,i2_LQ_Rweevil_c108641/f1p22/2954,i2_LQ_Rweevil_c87523/f1p5/2582,i2_HQ_Rweevil_c60499/f2p18/3879,i1_LQ_Rweevil_c77054/f1p0/1592,i2_LQ_Rweevil_c37484/f1p13/2963,i3_LQ_Rweevil_c1508…
GO:0006813	potassium ion transport	biological_process	0.0028308	0.11408	20	3203	90	27707	13	i3_LQ_Rweevil_c36265/f1p0/3285,i5_LQ_Rweevil_c1341/f1p0/5996,i5_LQ_Rweevil_c615/f1p0/5681,i10_LQ_Rweevil_c43/f1p0/10942,i2_LQ_Rweevil_c61382/f1p14/2602,i7_LQ_Rweevil_c101/f1p0/7258,i5_LQ_Rweevil_c3974/f1p0/5609,i5_LQ_Rweevil_c5556/f1p4/5013,i4_LQ_Rweevil_c3017/f1p66/4575,i6_LQ_Rweevil_c548/f1p0/6810,i3_LQ_Rweevil_c33769/f1p0/3187,i7_LQ_Rweevil_c1012/f1p0/7162,i3_HQ_Rweevil_c1899/f3p3/3226	7	i2_LQ_Rweevil_c77272/f1p3/2480,i2_LQ_Rweevil_c59048/f1p0/2825,i3_LQ_Rweevil_c25589/f1p0/3141,i3_HQ_Rweevil_c1440/f7p0/3196,i1_LQ_Rweevil_c5140/f4p8/1500,i1_LQ_Rweevil_c77054/f1p0/1592,i0_LQ_Rweevil_c22873/f1p0/943
GO:0015078	hydrogen ion transmembrane transporter activity	molecular_function	0.0037128	0.14819	66	3203	418	27707	48	i0_LQ_Rweevil_c26298/f1p0/337,i1_LQ_Rweevil_c23034/f1p5/1677,i2_HQ_Rweevil_c11897/f2p0/2255,i0_LQ_Rweevil_c28504/f1p0/912,i1_LQ_Rweevil_c81206/f1p0/1743,i7_LQ_Rweevil_c565/f1p0/7239,i1_LQ_Rweevil_c34353/f1p0/1023,i0_HQ_Rweevil_c71790/f5p0/583,i0_LQ_Rweevil_c49112/f1p0/469,i3_HQ_Rweevil_c17573/f2p2/3639,i0_LQ_Rweevil_c32571/f1p0/845,i1_LQ_Rweevil_c5955/f1p0/1950,i1_LQ_Rweevil_c29610/f1p4/1799,i2_L…	18	i2_LQ_Rweevil_c154820/f1p6/2288,i1_LQ_Rweevil_c34927/f1p56/1047,i6_LQ_Rweevil_c1261/f1p0/6409,i2_HQ_Rweevil_c73812/f71p8/2921,i2_HQ_Rweevil_c148481/f56p0/2908,i2_LQ_Rweevil_c37114/f1p136/2538,i2_LQ_Rweevil_c57578/f1p1/2936,i2_LQ_Rweevil_c22765/f1p28/2229,i2_LQ_Rweevil_c26338/f1p0/2901,i1_LQ_Rweevil_c120821/f1p3/1109,i3_LQ_Rweevil_c15089/f1p1/3036,i2_LQ_Rweevil_c87523/f1p5/2582,i2_HQ_Rweevil_c6049…
GO:0004576	oligosaccharyl transferase activity	molecular_function	0.0039111	0.15463	7	3203	19	27707	0		7	i2_LQ_Rweevil_c9725/f1p7/2819,i1_LQ_Rweevil_c48436/f1p0/1994,i2_HQ_Rweevil_c15406/f49p3/2777,i2_LQ_Rweevil_c44493/f1p1/2711,i2_LQ_Rweevil_c19512/f1p3/2852,i2_LQ_Rweevil_c85235/f1p3/2850,i2_LQ_Rweevil_c84441/f1p8/2845
GO:0016655	oxidoreductase activity, acting on NAD(P)H, quinone or similar compound as acceptor	molecular_function	0.0039538	0.15486	16	3203	70	27707	13	i4_LQ_Rweevil_c7765/f1p0/4625,i0_LQ_Rweevil_c51893/f1p0/377,i3_LQ_Rweevil_c33749/f1p0/3389,i2_LQ_Rweevil_c105435/f1p36/2773,i5_LQ_Rweevil_c4663/f1p693/5600,i0_HQ_Rweevil_c63451/f2p0/224,i2_HQ_Rweevil_c21274/f2p3/2707,i0_HQ_Rweevil_c721/f11p0/526,i0_HQ_Rweevil_c47333/f11p9/489,i1_LQ_Rweevil_c145427/f1p0/1018,i0_LQ_Rweevil_c7065/f1p27/837,i1_LQ_Rweevil_c6630/f1p0/1720,i0_LQ_Rweevil_c33680/f1p0/515	3	i4_LQ_Rweevil_c3352/f1p0/4367,i3_LQ_Rweevil_c26517/f1p0/3811,i1_LQ_Rweevil_c3883/f3p1/1829
GO:0016616	oxidoreductase activity, acting on the CH-OH group of donors, NAD or NADP as acceptor	molecular_function	0.0040488	0.15569	49	3203	291	27707	32	i1_HQ_Rweevil_c20209/f2p0/1783,i1_LQ_Rweevil_c30520/f1p0/1419,i2_LQ_Rweevil_c4200/f1p0/2428,i2_LQ_Rweevil_c10100/f1p8/2264,i1_LQ_Rweevil_c65508/f1p0/1426,i5_LQ_Rweevil_c4619/f1p0/5451,i1_LQ_Rweevil_c30675/f1p0/1922,i1_LQ_Rweevil_c46092/f1p0/1914,i2_HQ_Rweevil_c148702/f105p8/2248,i1_LQ_Rweevil_c6967/f1p4/1783,i1_HQ_Rweevil_c84590/f5p0/1117,i4_LQ_Rweevil_c10031/f1p0/4585,i2_LQ_Rweevil_c164541/f1p10…	17	i5_LQ_Rweevil_c4909/f1p33/5051,i1_LQ_Rweevil_c6276/f1p0/1731,i1_LQ_Rweevil_c26791/f1p17/1803,i2_LQ_Rweevil_c26312/f1p8/2200,i1_LQ_Rweevil_c7756/f1p0/1680,i3_LQ_Rweevil_c7589/f1p21/3380,i1_HQ_Rweevil_c52526/f2p0/1825,i2_LQ_Rweevil_c108645/f1p6/2872,i2_LQ_Rweevil_c50015/f1p1/2112,i1_LQ_Rweevil_c44465/f1p2/1716,i2_LQ_Rweevil_c50449/f1p8/2077,i1_LQ_Rweevil_c77730/f1p11/1809,i2_LQ_Rweevil_c94917/f1p6/…
GO:0044430	cytoskeletal part	cellular_component	0.0040493	0.15569	107	3203	719	27707	73	i1_LQ_Rweevil_c67077/f1p0/1989,i8_LQ_Rweevil_c270/f1p0/8923,i2_LQ_Rweevil_c57464/f1p25/2964,i1_LQ_Rweevil_c30154/f1p0/1691,i0_LQ_Rweevil_c6640/f1p3/886,i2_LQ_Rweevil_c25362/f1p1/2318,i3_LQ_Rweevil_c39396/f1p0/3083,i4_LQ_Rweevil_c10172/f1p0/4346,i1_LQ_Rweevil_c67874/f1p0/1811,i1_LQ_Rweevil_c20578/f1p0/1306,i1_LQ_Rweevil_c27631/f1p0/1996,i3_LQ_Rweevil_c26367/f1p3/3224,i1_HQ_Rweevil_c121978/f2p0/135…	34	i2_HQ_Rweevil_c31737/f28p1/2264,i2_LQ_Rweevil_c108261/f1p2/2820,i3_LQ_Rweevil_c12587/f1p0/3810,i2_LQ_Rweevil_c31521/f1p17/2037,i1_HQ_Rweevil_c1101/f24p0/1812,i2_LQ_Rweevil_c38367/f1p5/2852,i6_LQ_Rweevil_c571/f1p0/6118,i2_LQ_Rweevil_c43263/f2p0/2838,i2_HQ_Rweevil_c11146/f2p0/2776,i4_HQ_Rweevil_c877/f7p0/4503,i3_LQ_Rweevil_c9525/f1p0/3755,i2_HQ_Rweevil_c1904/f10p3/2685,i2_LQ_Rweevil_c115091/f1p20/2…
GO:0016615	malate dehydrogenase activity	molecular_function	0.0041256	0.15718	10	3203	34	27707	8	i1_LQ_Rweevil_c5098/f1p0/1686,i2_LQ_Rweevil_c120109/f1p7/2279,i2_HQ_Rweevil_c148702/f105p8/2248,i2_LQ_Rweevil_c25850/f1p4/2538,i2_HQ_Rweevil_c127409/f23p5/2284,i1_HQ_Rweevil_c29789/f4p0/1677,i3_LQ_Rweevil_c30150/f1p0/3011,i2_LQ_Rweevil_c10100/f1p8/2264	2	i2_LQ_Rweevil_c50449/f1p8/2077,i2_HQ_Rweevil_c51365/f18p5/2243
GO:0009165	nucleotide biosynthetic process	biological_process	0.0043222	0.16173	45	3203	266	27707	31	i2_LQ_Rweevil_c2998/f1p3/2300,i3_LQ_Rweevil_c25387/f1p0/3974,i1_LQ_Rweevil_c29610/f1p4/1799,i0_LQ_Rweevil_c58216/f1p0/679,i1_LQ_Rweevil_c7342/f1p0/1781,i2_HQ_Rweevil_c78235/f2p2/2278,i2_LQ_Rweevil_c58898/f1p0/2662,i0_LQ_Rweevil_c32571/f1p0/845,i2_LQ_Rweevil_c29924/f1p3/2108,i1_LQ_Rweevil_c5955/f1p0/1950,i6_LQ_Rweevil_c825/f1p16/6429,i4_LQ_Rweevil_c7548/f1p0/4229,i4_LQ_Rweevil_c13238/f1p0/4044,i0_…	14	i1_HQ_Rweevil_c13339/f3p12/1798,i2_HQ_Rweevil_c148481/f56p0/2908,i2_HQ_Rweevil_c73812/f71p8/2921,i6_LQ_Rweevil_c1261/f1p0/6409,i2_LQ_Rweevil_c71487/f1p3/2094,i2_LQ_Rweevil_c115091/f1p20/2356,i1_HQ_Rweevil_c121140/f49p0/1116,i2_LQ_Rweevil_c108641/f1p22/2954,i1_LQ_Rweevil_c34927/f1p56/1047,i2_HQ_Rweevil_c60499/f2p18/3879,i2_LQ_Rweevil_c87523/f1p5/2582,i2_LQ_Rweevil_c104991/f1p4/2181,i3_LQ_Rweevil_c…
GO:1901293	nucleoside phosphate biosynthetic process	biological_process	0.0043222	0.16173	45	3203	266	27707	31	i0_LQ_Rweevil_c30893/f1p0/641,i1_LQ_Rweevil_c34353/f1p0/1023,i1_HQ_Rweevil_c1913/f4p0/1852,i2_LQ_Rweevil_c14630/f1p6/2131,i2_LQ_Rweevil_c131140/f1p3/2327,i2_LQ_Rweevil_c82705/f1p23/2501,i0_LQ_Rweevil_c37758/f1p0/987,i0_LQ_Rweevil_c91019/f2p0/884,i0_LQ_Rweevil_c26298/f1p0/337,i1_LQ_Rweevil_c23034/f1p5/1677,i0_LQ_Rweevil_c23175/f1p7/817,i2_HQ_Rweevil_c54608/f2p4/2854,i2_LQ_Rweevil_c8751/f1p23/3093,…	14	i1_LQ_Rweevil_c34927/f1p56/1047,i3_LQ_Rweevil_c15089/f1p1/3036,i1_LQ_Rweevil_c124727/f1p0/1327,i2_LQ_Rweevil_c104991/f1p4/2181,i2_HQ_Rweevil_c60499/f2p18/3879,i2_LQ_Rweevil_c87523/f1p5/2582,i2_LQ_Rweevil_c108641/f1p22/2954,i1_HQ_Rweevil_c121140/f49p0/1116,i2_LQ_Rweevil_c115091/f1p20/2356,i2_LQ_Rweevil_c71487/f1p3/2094,i6_LQ_Rweevil_c1261/f1p0/6409,i2_HQ_Rweevil_c73812/f71p8/2921,i2_HQ_Rweevil_c14…
GO:0005319	lipid transporter activity	molecular_function	0.0046162	0.17121	16	3203	68	27707	16	i5_LQ_Rweevil_c2635/f1p4/5656,i5_LQ_Rweevil_c3578/f1p0/5624,i0_LQ_Rweevil_c4460/f2p0/859,i5_HQ_Rweevil_c276/f4p0/5541,i5_LQ_Rweevil_c3893/f1p6/5592,i5_LQ_Rweevil_c5084/f1p4/5096,i5_HQ_Rweevil_c241/f5p0/5603,i10_LQ_Rweevil_c41/f1p0/10904,i5_HQ_Rweevil_c284/f4p0/5543,i6_LQ_Rweevil_c646/f1p0/6611,i8_LQ_Rweevil_c102/f1p0/8951,i2_LQ_Rweevil_c113308/f1p1/2730,i9_LQ_Rweevil_c52/f1p0/9361,i5_LQ_Rweevil_c…	0
GO:1901700	response to oxygen-containing compound	biological_process	0.0051038	0.18763	10	3203	35	27707	9	i1_LQ_Rweevil_c30819/f1p9/1646,i2_LQ_Rweevil_c98680/f1p11/2728,i3_HQ_Rweevil_c40635/f18p0/3497,i2_LQ_Rweevil_c109811/f1p22/2985,i5_LQ_Rweevil_c1565/f1p1/5949,i3_LQ_Rweevil_c24154/f1p0/3513,i6_LQ_Rweevil_c1852/f1p0/6241,i3_LQ_Rweevil_c28121/f1p0/3628,i7_LQ_Rweevil_c707/f1p0/7991	1	i2_LQ_Rweevil_c109220/f1p20/2862
GO:0008289	lipid binding	molecular_function	0.0051796	0.18876	57	3203	351	27707	24	i2_LQ_Rweevil_c104527/f1p5/2829,i4_LQ_Rweevil_c9100/f1p0/4526,i2_LQ_Rweevil_c42813/f1p13/3584,i2_LQ_Rweevil_c106203/f1p8/2540,i4_LQ_Rweevil_c11169/f1p53/4817,i6_LQ_Rweevil_c1533/f1p0/6567,i3_HQ_Rweevil_c19173/f2p0/3599,i2_LQ_Rweevil_c36586/f2p13/2865,i1_LQ_Rweevil_c14992/f1p10/1123,i3_LQ_Rweevil_c23474/f1p6/3396,i9_LQ_Rweevil_c65/f1p0/9271,i2_LQ_Rweevil_c58214/f1p5/2939,i2_LQ_Rweevil_c13638/f1p12…	33	i3_LQ_Rweevil_c12587/f1p0/3810,i0_LQ_Rweevil_c27970/f1p0/756,i3_HQ_Rweevil_c37843/f4p8/3049,i2_HQ_Rweevil_c81295/f2p0/2832,i4_HQ_Rweevil_c1117/f4p0/4280,i2_LQ_Rweevil_c88973/f1p4/2732,i3_LQ_Rweevil_c34058/f1p0/3086,i2_LQ_Rweevil_c79187/f1p5/2298,i3_LQ_Rweevil_c26847/f1p1/3275,i2_LQ_Rweevil_c79018/f1p1/2158,i2_LQ_Rweevil_c36112/f1p7/2962,i2_LQ_Rweevil_c62889/f1p5/2119,i4_HQ_Rweevil_c877/f7p0/4503,…
GO:0004129	cytochrome-c oxidase activity	molecular_function	0.0054217	0.19256	21	3203	104	27707	21	i1_LQ_Rweevil_c34860/f1p0/1051,i1_LQ_Rweevil_c28835/f1p0/1262,i1_LQ_Rweevil_c5987/f1p0/1730,i3_LQ_Rweevil_c13629/f1p14/3821,i1_LQ_Rweevil_c34353/f1p0/1023,i0_HQ_Rweevil_c71790/f5p0/583,i4_LQ_Rweevil_c2968/f1p0/4632,i2_LQ_Rweevil_c27094/f1p302/2312,i1_LQ_Rweevil_c4310/f1p0/1312,i0_LQ_Rweevil_c49112/f1p0/469,i1_LQ_Rweevil_c145427/f1p0/1018,i1_LQ_Rweevil_c10926/f1p0/1868,i1_LQ_Rweevil_c68696/f1p0/15…	0
GO:0016675	oxidoreductase activity, acting on a heme group of donors	molecular_function	0.0054217	0.19256	21	3203	104	27707	21	i3_LQ_Rweevil_c24046/f1p0/3300,i2_LQ_Rweevil_c11827/f1p321/2430,i0_LQ_Rweevil_c3572/f1p0/757,i1_LQ_Rweevil_c81206/f1p0/1743,i1_LQ_Rweevil_c38182/f1p0/1626,i7_LQ_Rweevil_c565/f1p0/7239,i4_LQ_Rweevil_c3157/f1p0/4835,i0_LQ_Rweevil_c28504/f1p0/912,i2_LQ_Rweevil_c27094/f1p302/2312,i1_LQ_Rweevil_c34353/f1p0/1023,i0_HQ_Rweevil_c71790/f5p0/583,i4_LQ_Rweevil_c2968/f1p0/4632,i3_LQ_Rweevil_c13629/f1p14/3821…	0
GO:0016676	oxidoreductase activity, acting on a heme group of donors, oxygen as acceptor	molecular_function	0.0054217	0.19256	21	3203	104	27707	21	i1_LQ_Rweevil_c28835/f1p0/1262,i1_LQ_Rweevil_c5987/f1p0/1730,i1_LQ_Rweevil_c34860/f1p0/1051,i2_LQ_Rweevil_c27094/f1p302/2312,i4_LQ_Rweevil_c2968/f1p0/4632,i1_LQ_Rweevil_c34353/f1p0/1023,i0_HQ_Rweevil_c71790/f5p0/583,i3_LQ_Rweevil_c13629/f1p14/3821,i1_LQ_Rweevil_c68696/f1p0/1567,i0_LQ_Rweevil_c49112/f1p0/469,i1_LQ_Rweevil_c145427/f1p0/1018,i1_LQ_Rweevil_c10926/f1p0/1868,i1_LQ_Rweevil_c4310/f1p0/13…	0
GO:0030436	asexual sporulation	biological_process	0.0058108	0.20465	8	3203	26	27707	7	i2_LQ_Rweevil_c94128/f1p2/2098,i8_LQ_Rweevil_c244/f1p0/8473,i6_LQ_Rweevil_c646/f1p0/6611,i5_LQ_Rweevil_c5084/f1p4/5096,i3_LQ_Rweevil_c22669/f1p0/3277,i4_LQ_Rweevil_c8635/f1p11/4756,i5_HQ_Rweevil_c276/f4p0/5541	1	i1_HQ_Rweevil_c19335/f5p0/1908
GO:0000774	adenyl-nucleotide exchange factor activity	molecular_function	0.006731	0.23508	9	3203	31	27707	2	i0_LQ_Rweevil_c52297/f1p0/776,i1_LQ_Rweevil_c14992/f1p10/1123	7	i2_LQ_Rweevil_c79018/f1p1/2158,i7_LQ_Rweevil_c1023/f1p0/7115,i3_HQ_Rweevil_c2371/f3p4/3348,i2_LQ_Rweevil_c115091/f1p20/2356,i3_LQ_Rweevil_c26468/f1p12/3522,i2_LQ_Rweevil_c43754/f1p0/2994,i3_LQ_Rweevil_c28594/f1p0/3183
GO:0004553	hydrolase activity, hydrolyzing O-glycosyl compounds	molecular_function	0.0069494	0.2407	68	3203	437	27707	13	i2_LQ_Rweevil_c7072/f1p4/2784,i3_LQ_Rweevil_c27646/f1p6/3332,i2_LQ_Rweevil_c86428/f1p0/2458,i2_HQ_Rweevil_c102733/f2p12/2941,i1_LQ_Rweevil_c24539/f1p0/1622,i1_LQ_Rweevil_c54071/f1p0/1792,i1_LQ_Rweevil_c15110/f1p0/1147,i1_HQ_Rweevil_c13516/f4p4/1524,i3_LQ_Rweevil_c35093/f1p1/3128,i2_LQ_Rweevil_c77205/f1p12/2135,i2_LQ_Rweevil_c10000/f1p2/2799,i1_LQ_Rweevil_c82662/f1p3/1716,i3_LQ_Rweevil_c36798/f1p0…	55	i2_HQ_Rweevil_c7776/f3p3/2167,i2_LQ_Rweevil_c61017/f1p6/2339,i3_LQ_Rweevil_c10002/f1p18/3702,i2_LQ_Rweevil_c49566/f1p3/2070,i4_LQ_Rweevil_c5576/f1p0/4591,i1_LQ_Rweevil_c77225/f1p0/1583,i1_LQ_Rweevil_c28133/f1p0/1976,i2_HQ_Rweevil_c2426/f12p0/2784,i2_HQ_Rweevil_c74359/f2p2/2480,i2_LQ_Rweevil_c13317/f1p12/2671,i6_LQ_Rweevil_c1215/f1p0/6544,i2_LQ_Rweevil_c2711/f1p4/2895,i4_LQ_Rweevil_c5628/f1p0/4227…
GO:0009152	purine ribonucleotide biosynthetic process	biological_process	0.0073052	0.24583	36	3203	209	27707	24	i0_LQ_Rweevil_c37758/f1p0/987,i0_LQ_Rweevil_c26298/f1p0/337,i0_LQ_Rweevil_c91019/f2p0/884,i1_LQ_Rweevil_c23034/f1p5/1677,i0_LQ_Rweevil_c23175/f1p7/817,i2_LQ_Rweevil_c14630/f1p6/2131,i1_LQ_Rweevil_c34353/f1p0/1023,i2_LQ_Rweevil_c82705/f1p23/2501,i0_LQ_Rweevil_c32571/f1p0/845,i2_LQ_Rweevil_c58898/f1p0/2662,i2_HQ_Rweevil_c78235/f2p2/2278,i1_LQ_Rweevil_c5955/f1p0/1950,i2_LQ_Rweevil_c29924/f1p3/2108,i…	12	i2_LQ_Rweevil_c115091/f1p20/2356,i1_LQ_Rweevil_c34927/f1p56/1047,i2_LQ_Rweevil_c104991/f1p4/2181,i3_LQ_Rweevil_c15089/f1p1/3036,i2_HQ_Rweevil_c60499/f2p18/3879,i2_LQ_Rweevil_c87523/f1p5/2582,i2_LQ_Rweevil_c108641/f1p22/2954,i1_HQ_Rweevil_c121140/f49p0/1116,i2_HQ_Rweevil_c73812/f71p8/2921,i6_LQ_Rweevil_c1261/f1p0/6409,i2_HQ_Rweevil_c148481/f56p0/2908,i2_LQ_Rweevil_c71487/f1p3/2094
GO:0009260	ribonucleotide biosynthetic process	biological_process	0.0073052	0.24583	36	3203	209	27707	24	i1_LQ_Rweevil_c29610/f1p4/1799,i0_LQ_Rweevil_c58216/f1p0/679,i0_LQ_Rweevil_c32571/f1p0/845,i2_HQ_Rweevil_c78235/f2p2/2278,i2_LQ_Rweevil_c58898/f1p0/2662,i1_LQ_Rweevil_c5955/f1p0/1950,i2_LQ_Rweevil_c29924/f1p3/2108,i0_LQ_Rweevil_c30759/f1p0/656,i1_LQ_Rweevil_c80080/f1p0/1860,i4_LQ_Rweevil_c13238/f1p0/4044,i4_LQ_Rweevil_c7548/f1p0/4229,i6_LQ_Rweevil_c825/f1p16/6429,i0_LQ_Rweevil_c72444/f1p0/790,i3_…	12	i2_HQ_Rweevil_c148481/f56p0/2908,i6_LQ_Rweevil_c1261/f1p0/6409,i2_HQ_Rweevil_c73812/f71p8/2921,i2_LQ_Rweevil_c71487/f1p3/2094,i2_LQ_Rweevil_c115091/f1p20/2356,i2_LQ_Rweevil_c108641/f1p22/2954,i1_HQ_Rweevil_c121140/f49p0/1116,i1_LQ_Rweevil_c34927/f1p56/1047,i3_LQ_Rweevil_c15089/f1p1/3036,i2_LQ_Rweevil_c104991/f1p4/2181,i2_HQ_Rweevil_c60499/f2p18/3879,i2_LQ_Rweevil_c87523/f1p5/2582
GO:0046390	ribose phosphate biosynthetic process	biological_process	0.0073052	0.24583	36	3203	209	27707	24	i2_LQ_Rweevil_c29924/f1p3/2108,i1_LQ_Rweevil_c5955/f1p0/1950,i2_HQ_Rweevil_c78235/f2p2/2278,i2_LQ_Rweevil_c58898/f1p0/2662,i0_LQ_Rweevil_c32571/f1p0/845,i0_LQ_Rweevil_c58216/f1p0/679,i1_LQ_Rweevil_c29610/f1p4/1799,i2_LQ_Rweevil_c25688/f1p13/2199,i2_LQ_Rweevil_c8751/f1p23/3093,i0_LQ_Rweevil_c72444/f1p0/790,i3_LQ_Rweevil_c23430/f1p4/3618,i4_LQ_Rweevil_c13238/f1p0/4044,i6_LQ_Rweevil_c825/f1p16/6429,…	12	i6_LQ_Rweevil_c1261/f1p0/6409,i2_HQ_Rweevil_c73812/f71p8/2921,i2_HQ_Rweevil_c148481/f56p0/2908,i2_LQ_Rweevil_c71487/f1p3/2094,i2_LQ_Rweevil_c115091/f1p20/2356,i2_LQ_Rweevil_c87523/f1p5/2582,i2_HQ_Rweevil_c60499/f2p18/3879,i3_LQ_Rweevil_c15089/f1p1/3036,i2_LQ_Rweevil_c104991/f1p4/2181,i1_LQ_Rweevil_c34927/f1p56/1047,i1_HQ_Rweevil_c121140/f49p0/1116,i2_LQ_Rweevil_c108641/f1p22/2954
GO:0046834	lipid phosphorylation	biological_process	0.0073907	0.24583	5	3203	12	27707	4	i2_LQ_Rweevil_c21501/f1p2/2308,i1_LQ_Rweevil_c106904/f1p31/1203,i4_HQ_Rweevil_c1852/f2p0/4100,i2_LQ_Rweevil_c109656/f1p3/2530	1	i1_LQ_Rweevil_c16108/f1p0/1088
GO:0046854	phosphatidylinositol phosphorylation	biological_process	0.0073907	0.24583	5	3203	12	27707	4	i2_LQ_Rweevil_c21501/f1p2/2308,i1_LQ_Rweevil_c106904/f1p31/1203,i4_HQ_Rweevil_c1852/f2p0/4100,i2_LQ_Rweevil_c109656/f1p3/2530	1	i1_LQ_Rweevil_c16108/f1p0/1088
GO:0022890	inorganic cation transmembrane transporter activity	molecular_function	0.0075476	0.24734	115	3203	806	27707	81	i3_LQ_Rweevil_c24046/f1p0/3300,i0_LQ_Rweevil_c37758/f1p0/987,i2_LQ_Rweevil_c56369/f1p8/2079,i0_LQ_Rweevil_c32816/f1p0/906,i0_LQ_Rweevil_c91019/f2p0/884,i1_LQ_Rweevil_c30819/f1p9/1646,i0_LQ_Rweevil_c23175/f1p7/817,i6_LQ_Rweevil_c1820/f1p2/6291,i4_LQ_Rweevil_c2968/f1p0/4632,i3_LQ_Rweevil_c13629/f1p14/3821,i6_LQ_Rweevil_c2216/f1p7/6084,i2_HQ_Rweevil_c139476/f2p77/2061,i5_LQ_Rweevil_c2635/f1p4/5656,i…	34	i2_LQ_Rweevil_c37114/f1p136/2538,i1_HQ_Rweevil_c2167/f8p0/1791,i2_LQ_Rweevil_c57578/f1p1/2936,i3_LQ_Rweevil_c15089/f1p1/3036,i2_LQ_Rweevil_c37484/f1p13/2963,i1_LQ_Rweevil_c77054/f1p0/1592,i2_LQ_Rweevil_c87523/f1p5/2582,i2_HQ_Rweevil_c60499/f2p18/3879,i2_LQ_Rweevil_c26338/f1p0/2901,i2_LQ_Rweevil_c22765/f1p28/2229,i1_LQ_Rweevil_c120821/f1p3/1109,i2_LQ_Rweevil_c108641/f1p22/2954,i2_HQ_Rweevil_c51491…
GO:0043648	dicarboxylic acid metabolic process	biological_process	0.0075541	0.24734	7	3203	21	27707	3	i4_LQ_Rweevil_c10298/f1p0/4710,i3_LQ_Rweevil_c43458/f1p0/3034,i7_LQ_Rweevil_c163/f1p0/7822	4	i2_LQ_Rweevil_c27658/f1p8/2769,i3_LQ_Rweevil_c25589/f1p0/3141,i3_HQ_Rweevil_c1440/f7p0/3196,i2_HQ_Rweevil_c73820/f17p1/2269
GO:0045333	cellular respiration	biological_process	0.0078012	0.25296	23	3203	119	27707	22	i3_LQ_Rweevil_c13629/f1p14/3821,i1_LQ_Rweevil_c5098/f1p0/1686,i2_LQ_Rweevil_c27094/f1p302/2312,i4_LQ_Rweevil_c2968/f1p0/4632,i1_LQ_Rweevil_c28835/f1p0/1262,i0_LQ_Rweevil_c33680/f1p0/515,i1_LQ_Rweevil_c34860/f1p0/1051,i5_HQ_Rweevil_c557/f2p0/5530,i1_LQ_Rweevil_c10926/f1p0/1868,i1_LQ_Rweevil_c4310/f1p0/1312,i1_LQ_Rweevil_c68696/f1p0/1567,i2_LQ_Rweevil_c11827/f1p321/2430,i5_LQ_Rweevil_c3832/f1p6/550…	1	i2_LQ_Rweevil_c42540/f1p4/2402
GO:0004019	adenylosuccinate synthase activity	molecular_function	0.007881	0.25296	5	3203	12	27707	4	i1_LQ_Rweevil_c7342/f1p0/1781,i0_LQ_Rweevil_c30893/f1p0/641,i2_HQ_Rweevil_c54608/f2p4/2854,i3_LQ_Rweevil_c25387/f1p0/3974	1	i1_LQ_Rweevil_c124727/f1p0/1327
GO:0019310	inositol catabolic process	biological_process	0.0081482	0.25296	4	3203	8	27707	0		4	i3_LQ_Rweevil_c27969/f1p0/3702,i1_LQ_Rweevil_c91074/f1p0/1127,i7_LQ_Rweevil_c453/f1p0/7423,i1_LQ_Rweevil_c16810/f1p0/1069
GO:0046164	alcohol catabolic process	biological_process	0.0081482	0.25296	4	3203	8	27707	0		4	i1_LQ_Rweevil_c16810/f1p0/1069,i7_LQ_Rweevil_c453/f1p0/7423,i3_LQ_Rweevil_c27969/f1p0/3702,i1_LQ_Rweevil_c91074/f1p0/1127
GO:0046174	polyol catabolic process	biological_process	0.0081482	0.25296	4	3203	8	27707	0		4	i7_LQ_Rweevil_c453/f1p0/7423,i1_LQ_Rweevil_c16810/f1p0/1069,i1_LQ_Rweevil_c91074/f1p0/1127,i3_LQ_Rweevil_c27969/f1p0/3702
GO:0050113	inositol oxygenase activity	molecular_function	0.0081482	0.25296	4	3203	8	27707	0		4	i3_LQ_Rweevil_c27969/f1p0/3702,i1_LQ_Rweevil_c91074/f1p0/1127,i1_LQ_Rweevil_c16810/f1p0/1069,i7_LQ_Rweevil_c453/f1p0/7423
GO:1901616	organic hydroxy compound catabolic process	biological_process	0.0081482	0.25296	4	3203	8	27707	0		4	i7_LQ_Rweevil_c453/f1p0/7423,i1_LQ_Rweevil_c16810/f1p0/1069,i1_LQ_Rweevil_c91074/f1p0/1127,i3_LQ_Rweevil_c27969/f1p0/3702
GO:0098660	inorganic ion transmembrane transport	biological_process	0.0082451	0.25408	75	3203	497	27707	49	i2_HQ_Rweevil_c139476/f2p77/2061,i4_LQ_Rweevil_c8323/f1p263/4781,i0_LQ_Rweevil_c23142/f1p0/848,i3_LQ_Rweevil_c41812/f1p0/3663,i2_LQ_Rweevil_c82705/f1p23/2501,i0_LQ_Rweevil_c37758/f1p0/987,i0_LQ_Rweevil_c91019/f2p0/884,i0_LQ_Rweevil_c32816/f1p0/906,i4_HQ_Rweevil_c1588/f2p0/4834,i0_LQ_Rweevil_c23175/f1p7/817,i6_LQ_Rweevil_c1820/f1p2/6291,i1_LQ_Rweevil_c8453/f1p2/1955,i2_LQ_Rweevil_c8751/f1p23/3093,…	26	i2_LQ_Rweevil_c22765/f1p28/2229,i2_LQ_Rweevil_c26338/f1p0/2901,i1_LQ_Rweevil_c120821/f1p3/1109,i0_LQ_Rweevil_c22873/f1p0/943,i3_LQ_Rweevil_c15089/f1p1/3036,i2_LQ_Rweevil_c37484/f1p13/2963,i2_LQ_Rweevil_c87523/f1p5/2582,i2_HQ_Rweevil_c60499/f2p18/3879,i2_HQ_Rweevil_c51491/f15p5/2116,i2_LQ_Rweevil_c108641/f1p22/2954,i1_HQ_Rweevil_c121140/f49p0/1116,i2_LQ_Rweevil_c37114/f1p136/2538,i2_LQ_Rweevil_c57…
GO:0008324	cation transmembrane transporter activity	molecular_function	0.0086487	0.26011	124	3203	880	27707	83	i0_LQ_Rweevil_c26298/f1p0/337,i1_LQ_Rweevil_c23034/f1p5/1677,i9_LQ_Rweevil_c52/f1p0/9361,i2_LQ_Rweevil_c123595/f1p0/2067,i4_LQ_Rweevil_c4591/f1p0/4277,i4_HQ_Rweevil_c1289/f3p0/4466,i5_LQ_Rweevil_c4622/f1p0/5571,i0_LQ_Rweevil_c28504/f1p0/912,i2_HQ_Rweevil_c11897/f2p0/2255,i0_LQ_Rweevil_c27279/f1p3/610,i7_LQ_Rweevil_c565/f1p0/7239,i1_LQ_Rweevil_c67716/f1p0/1675,i1_LQ_Rweevil_c81206/f1p0/1743,i2_HQ_…	41	i3_LQ_Rweevil_c28153/f1p2/3976,i3_LQ_Rweevil_c26468/f1p12/3522,i1_LQ_Rweevil_c11386/f1p0/1543,i2_LQ_Rweevil_c154820/f1p6/2288,i2_LQ_Rweevil_c41693/f1p3/2041,i1_LQ_Rweevil_c34927/f1p56/1047,i2_HQ_Rweevil_c14224/f19p5/2457,i3_LQ_Rweevil_c28594/f1p0/3183,i2_HQ_Rweevil_c73812/f71p8/2921,i6_LQ_Rweevil_c1261/f1p0/6409,i0_HQ_Rweevil_c1204/f6p3/814,i2_HQ_Rweevil_c148481/f56p0/2908,i4_LQ_Rweevil_c5458/f1p…
GO:0006029	proteoglycan metabolic process	biological_process	0.0087564	0.26011	4	3203	8	27707	0		4	i3_HQ_Rweevil_c1347/f10p0/3386,i2_LQ_Rweevil_c18578/f1p0/2624,i2_LQ_Rweevil_c62523/f1p0/2659,i3_LQ_Rweevil_c10644/f1p3/3279
GO:0015012	heparan sulfate proteoglycan biosynthetic process	biological_process	0.0087564	0.26011	4	3203	8	27707	0		4	i2_LQ_Rweevil_c62523/f1p0/2659,i2_LQ_Rweevil_c18578/f1p0/2624,i3_HQ_Rweevil_c1347/f10p0/3386,i3_LQ_Rweevil_c10644/f1p3/3279
GO:0030166	proteoglycan biosynthetic process	biological_process	0.0087564	0.26011	4	3203	8	27707	0		4	i3_LQ_Rweevil_c10644/f1p3/3279,i2_LQ_Rweevil_c18578/f1p0/2624,i2_LQ_Rweevil_c62523/f1p0/2659,i3_HQ_Rweevil_c1347/f10p0/3386
GO:0030201	heparan sulfate proteoglycan metabolic process	biological_process	0.0087564	0.26011	4	3203	8	27707	0		4	i3_LQ_Rweevil_c10644/f1p3/3279,i2_LQ_Rweevil_c18578/f1p0/2624,i2_LQ_Rweevil_c62523/f1p0/2659,i3_HQ_Rweevil_c1347/f10p0/3386
GO:0040012	regulation of locomotion	biological_process	0.0088131	0.26011	12	3203	49	27707	6	i1_LQ_Rweevil_c12972/f1p60/1762,i1_LQ_Rweevil_c10445/f1p0/1939,i1_LQ_Rweevil_c67077/f1p0/1989,i1_LQ_Rweevil_c4940/f1p0/1795,i2_LQ_Rweevil_c55224/f1p4/2604,i1_LQ_Rweevil_c50155/f1p1/1754	6	i0_LQ_Rweevil_c15452/f1p0/544,i2_LQ_Rweevil_c58118/f1p0/2812,i11_LQ_Rweevil_c12/f1p0/11139,i7_LQ_Rweevil_c114/f1p0/7273,i2_HQ_Rweevil_c147752/f24p21/2935,i3_LQ_Rweevil_c19966/f1p0/3112
GO:1901137	carbohydrate derivative biosynthetic process	biological_process	0.0091971	0.26955	65	3203	425	27707	28	i4_HQ_Rweevil_c1587/f2p0/4333,i1_LQ_Rweevil_c5955/f1p0/1950,i2_LQ_Rweevil_c58898/f1p0/2662,i0_LQ_Rweevil_c32571/f1p0/845,i1_LQ_Rweevil_c29610/f1p4/1799,i3_LQ_Rweevil_c23430/f1p4/3618,i0_LQ_Rweevil_c72444/f1p0/790,i4_LQ_Rweevil_c7548/f1p0/4229,i1_LQ_Rweevil_c23034/f1p5/1677,i0_LQ_Rweevil_c26298/f1p0/337,i2_LQ_Rweevil_c14630/f1p6/2131,i1_LQ_Rweevil_c34353/f1p0/1023,i2_LQ_Rweevil_c29924/f1p3/2108,i2…	37	i2_HQ_Rweevil_c73812/f71p8/2921,i6_LQ_Rweevil_c1261/f1p0/6409,i0_LQ_Rweevil_c52386/f1p0/778,i2_LQ_Rweevil_c85235/f1p3/2850,i2_LQ_Rweevil_c19512/f1p3/2852,i2_HQ_Rweevil_c148481/f56p0/2908,i1_LQ_Rweevil_c48436/f1p0/1994,i2_HQ_Rweevil_c15406/f49p3/2777,i1_LQ_Rweevil_c68097/f1p0/1836,i2_HQ_Rweevil_c117871/f4p2/2084,i2_LQ_Rweevil_c104991/f1p4/2181,i3_LQ_Rweevil_c10644/f1p3/3279,i2_LQ_Rweevil_c52506/f4…
GO:0046034	ATP metabolic process	biological_process	0.0093602	0.27242	42	3203	255	27707	30	i2_LQ_Rweevil_c82705/f1p23/2501,i5_HQ_Rweevil_c557/f2p0/5530,i0_LQ_Rweevil_c33680/f1p0/515,i1_LQ_Rweevil_c34353/f1p0/1023,i0_LQ_Rweevil_c23175/f1p7/817,i4_HQ_Rweevil_c1158/f4p0/4431,i0_LQ_Rweevil_c37758/f1p0/987,i0_LQ_Rweevil_c91019/f2p0/884,i0_LQ_Rweevil_c26298/f1p0/337,i2_LQ_Rweevil_c36370/f1p27/2340,i1_LQ_Rweevil_c23034/f1p5/1677,i1_LQ_Rweevil_c80080/f1p0/1860,i0_LQ_Rweevil_c30759/f1p0/656,i4_…	12	i2_LQ_Rweevil_c108641/f1p22/2954,i1_HQ_Rweevil_c121140/f49p0/1116,i1_LQ_Rweevil_c34927/f1p56/1047,i3_LQ_Rweevil_c15089/f1p1/3036,i2_LQ_Rweevil_c87523/f1p5/2582,i2_HQ_Rweevil_c60499/f2p18/3879,i1_HQ_Rweevil_c96480/f7p0/1646,i2_LQ_Rweevil_c24555/f1p5/2795,i2_LQ_Rweevil_c85130/f1p0/2686,i2_HQ_Rweevil_c148481/f56p0/2908,i2_HQ_Rweevil_c73812/f71p8/2921,i6_LQ_Rweevil_c1261/f1p0/6409
GO:0051493	regulation of cytoskeleton organization	biological_process	0.0095982	0.27742	16	3203	74	27707	2	i3_LQ_Rweevil_c11432/f1p0/3270,i3_LQ_Rweevil_c28485/f1p0/3157	14	i3_LQ_Rweevil_c11316/f1p53/3435,i1_LQ_Rweevil_c52460/f1p0/1638,i3_LQ_Rweevil_c15089/f1p1/3036,i3_LQ_Rweevil_c25836/f1p0/3224,i5_LQ_Rweevil_c3661/f1p0/5446,i3_HQ_Rweevil_c40362/f2p0/3048,i3_LQ_Rweevil_c29801/f1p0/3108,i3_HQ_Rweevil_c37843/f4p8/3049,i2_HQ_Rweevil_c81295/f2p0/2832,i3_LQ_Rweevil_c2747/f1p0/3313,i3_LQ_Rweevil_c34058/f1p0/3086,i2_HQ_Rweevil_c31737/f28p1/2264,i3_LQ_Rweevil_c26847/f1p1/3…
GO:0098655	cation transmembrane transport	biological_process	0.009739	0.27766	74	3203	493	27707	48	i1_LQ_Rweevil_c34353/f1p0/1023,i3_HQ_Rweevil_c17573/f2p2/3639,i0_LQ_Rweevil_c26298/f1p0/337,i4_LQ_Rweevil_c4591/f1p0/4277,i1_LQ_Rweevil_c23034/f1p5/1677,i0_LQ_Rweevil_c27279/f1p3/610,i5_LQ_Rweevil_c929/f1p0/5947,i7_LQ_Rweevil_c551/f1p0/7327,i2_LQ_Rweevil_c23530/f1p2/2987,i4_HQ_Rweevil_c1333/f3p0/4503,i4_LQ_Rweevil_c7548/f1p0/4229,i2_LQ_Rweevil_c19793/f1p2/2470,i3_LQ_Rweevil_c23430/f1p4/3618,i5_LQ…	26	i1_LQ_Rweevil_c34927/f1p56/1047,i4_LQ_Rweevil_c9767/f1p0/4699,i1_LQ_Rweevil_c11386/f1p0/1543,i2_LQ_Rweevil_c154820/f1p6/2288,i2_LQ_Rweevil_c88626/f1p2/2735,i2_HQ_Rweevil_c73812/f71p8/2921,i6_LQ_Rweevil_c1261/f1p0/6409,i2_HQ_Rweevil_c148481/f56p0/2908,i2_LQ_Rweevil_c22765/f1p28/2229,i2_LQ_Rweevil_c26338/f1p0/2901,i1_LQ_Rweevil_c120821/f1p3/1109,i0_LQ_Rweevil_c22873/f1p0/943,i2_LQ_Rweevil_c37484/f1…
GO:0098662	inorganic cation transmembrane transport	biological_process	0.009739	0.27766	74	3203	493	27707	48	i0_LQ_Rweevil_c32571/f1p0/845,i2_LQ_Rweevil_c58898/f1p0/2662,i4_LQ_Rweevil_c4424/f1p3/4454,i1_LQ_Rweevil_c5955/f1p0/1950,i2_LQ_Rweevil_c77628/f1p8/3057,i1_LQ_Rweevil_c29610/f1p4/1799,i2_LQ_Rweevil_c5851/f1p12/2177,i6_LQ_Rweevil_c392/f1p0/6215,i1_LQ_Rweevil_c8309/f1p0/1805,i5_LQ_Rweevil_c929/f1p0/5947,i7_LQ_Rweevil_c551/f1p0/7327,i2_LQ_Rweevil_c23530/f1p2/2987,i4_HQ_Rweevil_c1333/f3p0/4503,i4_LQ_R…	26	i2_LQ_Rweevil_c88626/f1p2/2735,i2_HQ_Rweevil_c73812/f71p8/2921,i6_LQ_Rweevil_c1261/f1p0/6409,i2_HQ_Rweevil_c148481/f56p0/2908,i1_LQ_Rweevil_c11386/f1p0/1543,i2_LQ_Rweevil_c154820/f1p6/2288,i1_LQ_Rweevil_c34927/f1p56/1047,i4_LQ_Rweevil_c9767/f1p0/4699,i1_LQ_Rweevil_c53458/f1p0/1733,i2_LQ_Rweevil_c77177/f1p2/3010,i3_LQ_Rweevil_c12587/f1p0/3810,i1_LQ_Rweevil_c73447/f1p5/1598,i2_LQ_Rweevil_c38367/f1p…
GO:0015002	heme-copper terminal oxidase activity	molecular_function	0.010133	0.2857	22	3203	117	27707	22	i0_LQ_Rweevil_c28504/f1p0/912,i4_LQ_Rweevil_c3157/f1p0/4835,i7_LQ_Rweevil_c565/f1p0/7239,i1_LQ_Rweevil_c38182/f1p0/1626,i1_LQ_Rweevil_c81206/f1p0/1743,i0_LQ_Rweevil_c3572/f1p0/757,i3_LQ_Rweevil_c4280/f1p0/3640,i2_LQ_Rweevil_c11827/f1p321/2430,i3_LQ_Rweevil_c24046/f1p0/3300,i1_LQ_Rweevil_c4310/f1p0/1312,i0_LQ_Rweevil_c49112/f1p0/469,i1_LQ_Rweevil_c145427/f1p0/1018,i1_LQ_Rweevil_c10926/f1p0/1868,i1…	0
GO:0015980	energy derivation by oxidation of organic compounds	biological_process	0.010157	0.2857	25	3203	135	27707	23	i0_LQ_Rweevil_c28504/f1p0/912,i4_LQ_Rweevil_c3157/f1p0/4835,i7_LQ_Rweevil_c565/f1p0/7239,i2_LQ_Rweevil_c9947/f1p8/2889,i1_LQ_Rweevil_c38182/f1p0/1626,i1_LQ_Rweevil_c81206/f1p0/1743,i4_LQ_Rweevil_c7765/f1p0/4625,i4_HQ_Rweevil_c1158/f4p0/4431,i1_HQ_Rweevil_c29789/f4p0/1677,i2_LQ_Rweevil_c11827/f1p321/2430,i3_LQ_Rweevil_c24046/f1p0/3300,i5_LQ_Rweevil_c3832/f1p6/5509,i1_LQ_Rweevil_c4310/f1p0/1312,i1_…	2	i2_LQ_Rweevil_c42540/f1p4/2402,i2_HQ_Rweevil_c99536/f30p7/2798
GO:0016798	hydrolase activity, acting on glycosyl bonds	molecular_function	0.010565	0.29519	71	3203	468	27707	16	i2_LQ_Rweevil_c10000/f1p2/2799,i2_LQ_Rweevil_c77205/f1p12/2135,i3_LQ_Rweevil_c35093/f1p1/3128,i3_LQ_Rweevil_c36798/f1p0/3269,i2_LQ_Rweevil_c136565/f1p3/3014,i1_LQ_Rweevil_c82662/f1p3/1716,i2_LQ_Rweevil_c27346/f1p3/2983,i2_LQ_Rweevil_c86428/f1p0/2458,i3_LQ_Rweevil_c27646/f1p6/3332,i2_LQ_Rweevil_c7072/f1p4/2784,i1_HQ_Rweevil_c13516/f4p4/1524,i1_LQ_Rweevil_c15110/f1p0/1147,i1_LQ_Rweevil_c54071/f1p0/…	55	i1_HQ_Rweevil_c18127/f3p9/1760,i4_LQ_Rweevil_c2879/f1p3/4576,i2_LQ_Rweevil_c49875/f1p14/2095,i5_LQ_Rweevil_c3151/f1p0/5163,i3_LQ_Rweevil_c14505/f1p0/3055,i9_LQ_Rweevil_c112/f1p0/9092,i1_LQ_Rweevil_c6276/f1p0/1731,i2_LQ_Rweevil_c3672/f1p15/2397,i0_LQ_Rweevil_c3133/f1p0/935,i1_HQ_Rweevil_c2374/f3p0/1650,i8_LQ_Rweevil_c220/f1p0/8868,i0_LQ_Rweevil_c15452/f1p0/544,i8_LQ_Rweevil_c250/f1p0/8927,i2_LQ_Rw…
GO:0006818	hydrogen transport	biological_process	0.010773	0.29705	65	3203	427	27707	41	i3_LQ_Rweevil_c41812/f1p0/3663,i2_LQ_Rweevil_c82705/f1p23/2501,i2_HQ_Rweevil_c139476/f2p77/2061,i4_LQ_Rweevil_c8323/f1p263/4781,i0_LQ_Rweevil_c23175/f1p7/817,i2_LQ_Rweevil_c36370/f1p27/2340,i4_HQ_Rweevil_c1588/f2p0/4834,i0_LQ_Rweevil_c37758/f1p0/987,i0_LQ_Rweevil_c91019/f2p0/884,i0_LQ_Rweevil_c32816/f1p0/906,i2_HQ_Rweevil_c50762/f23p5/2889,i2_LQ_Rweevil_c55224/f1p4/2604,i3_HQ_Rweevil_c19173/f2p0/…	24	i2_LQ_Rweevil_c108641/f1p22/2954,i1_HQ_Rweevil_c121140/f49p0/1116,i3_LQ_Rweevil_c15089/f1p1/3036,i2_HQ_Rweevil_c60499/f2p18/3879,i2_LQ_Rweevil_c87523/f1p5/2582,i2_LQ_Rweevil_c22765/f1p28/2229,i2_LQ_Rweevil_c26338/f1p0/2901,i1_LQ_Rweevil_c120821/f1p3/1109,i2_LQ_Rweevil_c57578/f1p1/2936,i2_LQ_Rweevil_c37114/f1p136/2538,i1_LQ_Rweevil_c73447/f1p5/1598,i2_LQ_Rweevil_c38367/f1p5/2852,i3_LQ_Rweevil_c125…
GO:0015992	proton transport	biological_process	0.010773	0.29705	65	3203	427	27707	41	i2_HQ_Rweevil_c139476/f2p77/2061,i4_LQ_Rweevil_c8323/f1p263/4781,i3_LQ_Rweevil_c41812/f1p0/3663,i2_LQ_Rweevil_c82705/f1p23/2501,i2_LQ_Rweevil_c36370/f1p27/2340,i4_HQ_Rweevil_c1588/f2p0/4834,i0_LQ_Rweevil_c37758/f1p0/987,i0_LQ_Rweevil_c32816/f1p0/906,i0_LQ_Rweevil_c91019/f2p0/884,i0_LQ_Rweevil_c23175/f1p7/817,i2_LQ_Rweevil_c25688/f1p13/2199,i2_LQ_Rweevil_c8751/f1p23/3093,i2_LQ_Rweevil_c55224/f1p4/…	24	i3_LQ_Rweevil_c15089/f1p1/3036,i2_LQ_Rweevil_c87523/f1p5/2582,i2_HQ_Rweevil_c60499/f2p18/3879,i2_LQ_Rweevil_c22765/f1p28/2229,i2_LQ_Rweevil_c26338/f1p0/2901,i1_LQ_Rweevil_c120821/f1p3/1109,i2_LQ_Rweevil_c108641/f1p22/2954,i1_HQ_Rweevil_c121140/f49p0/1116,i2_LQ_Rweevil_c37114/f1p136/2538,i2_LQ_Rweevil_c57578/f1p1/2936,i1_LQ_Rweevil_c73447/f1p5/1598,i2_LQ_Rweevil_c38367/f1p5/2852,i3_LQ_Rweevil_c125…
GO:0033177	proton-transporting two-sector ATPase complex, proton-transporting domain	cellular_component	0.01114	0.30514	40	3203	243	27707	23	i0_LQ_Rweevil_c23175/f1p7/817,i0_LQ_Rweevil_c37758/f1p0/987,i0_LQ_Rweevil_c26298/f1p0/337,i0_LQ_Rweevil_c91019/f2p0/884,i0_LQ_Rweevil_c32816/f1p0/906,i1_LQ_Rweevil_c23034/f1p5/1677,i2_LQ_Rweevil_c82705/f1p23/2501,i3_LQ_Rweevil_c41812/f1p0/3663,i3_HQ_Rweevil_c17573/f2p2/3639,i2_HQ_Rweevil_c139476/f2p77/2061,i1_LQ_Rweevil_c34353/f1p0/1023,i0_LQ_Rweevil_c32571/f1p0/845,i2_HQ_Rweevil_c78235/f2p2/2278…	17	i2_LQ_Rweevil_c154820/f1p6/2288,i2_LQ_Rweevil_c57578/f1p1/2936,i2_LQ_Rweevil_c37114/f1p136/2538,i2_LQ_Rweevil_c108641/f1p22/2954,i1_HQ_Rweevil_c121140/f49p0/1116,i1_LQ_Rweevil_c34927/f1p56/1047,i2_LQ_Rweevil_c22765/f1p28/2229,i2_LQ_Rweevil_c26338/f1p0/2901,i1_LQ_Rweevil_c120821/f1p3/1109,i3_LQ_Rweevil_c15089/f1p1/3036,i2_LQ_Rweevil_c87523/f1p5/2582,i2_HQ_Rweevil_c60499/f2p18/3879,i2_HQ_Rweevil_c1…
GO:0000302	response to reactive oxygen species	biological_process	0.011749	0.31563	8	3203	28	27707	7	i2_LQ_Rweevil_c109811/f1p22/2985,i3_HQ_Rweevil_c40635/f18p0/3497,i2_LQ_Rweevil_c98680/f1p11/2728,i1_LQ_Rweevil_c30819/f1p9/1646,i6_LQ_Rweevil_c1852/f1p0/6241,i3_LQ_Rweevil_c28121/f1p0/3628,i3_LQ_Rweevil_c24154/f1p0/3513	1	i2_LQ_Rweevil_c109220/f1p20/2862
GO:1901031	regulation of response to reactive oxygen species	biological_process	0.011749	0.31563	8	3203	28	27707	7	i6_LQ_Rweevil_c1852/f1p0/6241,i3_LQ_Rweevil_c28121/f1p0/3628,i3_LQ_Rweevil_c24154/f1p0/3513,i2_LQ_Rweevil_c109811/f1p22/2985,i2_LQ_Rweevil_c98680/f1p11/2728,i1_LQ_Rweevil_c30819/f1p9/1646,i3_HQ_Rweevil_c40635/f18p0/3497	1	i2_LQ_Rweevil_c109220/f1p20/2862
GO:1902882	regulation of response to oxidative stress	biological_process	0.011749	0.31563	8	3203	28	27707	7	i2_LQ_Rweevil_c109811/f1p22/2985,i3_HQ_Rweevil_c40635/f18p0/3497,i1_LQ_Rweevil_c30819/f1p9/1646,i2_LQ_Rweevil_c98680/f1p11/2728,i6_LQ_Rweevil_c1852/f1p0/6241,i3_LQ_Rweevil_c28121/f1p0/3628,i3_LQ_Rweevil_c24154/f1p0/3513	1	i2_LQ_Rweevil_c109220/f1p20/2862
GO:0004470	malic enzyme activity	molecular_function	0.01211	0.32121	8	3203	28	27707	6	i2_LQ_Rweevil_c10100/f1p8/2264,i2_LQ_Rweevil_c25850/f1p4/2538,i2_LQ_Rweevil_c120109/f1p7/2279,i2_HQ_Rweevil_c148702/f105p8/2248,i2_HQ_Rweevil_c127409/f23p5/2284,i3_LQ_Rweevil_c30150/f1p0/3011	2	i2_LQ_Rweevil_c50449/f1p8/2077,i2_HQ_Rweevil_c51365/f18p5/2243
GO:0004471	malate dehydrogenase (decarboxylating) (NAD+) activity	molecular_function	0.01211	0.32121	8	3203	28	27707	6	i2_LQ_Rweevil_c10100/f1p8/2264,i2_LQ_Rweevil_c25850/f1p4/2538,i2_LQ_Rweevil_c120109/f1p7/2279,i2_HQ_Rweevil_c148702/f105p8/2248,i3_LQ_Rweevil_c30150/f1p0/3011,i2_HQ_Rweevil_c127409/f23p5/2284	2	i2_LQ_Rweevil_c50449/f1p8/2077,i2_HQ_Rweevil_c51365/f18p5/2243
GO:0009117	nucleotide metabolic process	biological_process	0.013111	0.32642	61	3203	402	27707	41	i0_LQ_Rweevil_c58216/f1p0/679,i4_LQ_Rweevil_c7765/f1p0/4625,i1_LQ_Rweevil_c7342/f1p0/1781,i1_LQ_Rweevil_c29610/f1p4/1799,i3_LQ_Rweevil_c25387/f1p0/3974,i2_LQ_Rweevil_c153769/f1p8/2884,i2_LQ_Rweevil_c2998/f1p3/2300,i5_LQ_Rweevil_c3832/f1p6/5509,i1_LQ_Rweevil_c5955/f1p0/1950,i2_LQ_Rweevil_c29924/f1p3/2108,i0_LQ_Rweevil_c32571/f1p0/845,i2_HQ_Rweevil_c78235/f2p2/2278,i2_LQ_Rweevil_c58898/f1p0/2662,i2…	20	i2_HQ_Rweevil_c148481/f56p0/2908,i1_HQ_Rweevil_c13339/f3p12/1798,i2_HQ_Rweevil_c73812/f71p8/2921,i6_LQ_Rweevil_c1261/f1p0/6409,i2_LQ_Rweevil_c71487/f1p3/2094,i2_LQ_Rweevil_c24555/f1p5/2795,i2_LQ_Rweevil_c85130/f1p0/2686,i1_HQ_Rweevil_c52526/f2p0/1825,i3_LQ_Rweevil_c7589/f1p21/3380,i2_LQ_Rweevil_c115091/f1p20/2356,i2_LQ_Rweevil_c23856/f1p0/2512,i1_HQ_Rweevil_c96480/f7p0/1646,i2_LQ_Rweevil_c108641/…
GO:0042451	purine nucleoside biosynthetic process	biological_process	0.013124	0.32642	35	3203	210	27707	24	i0_LQ_Rweevil_c32571/f1p0/845,i2_LQ_Rweevil_c58898/f1p0/2662,i2_HQ_Rweevil_c78235/f2p2/2278,i1_LQ_Rweevil_c5955/f1p0/1950,i2_LQ_Rweevil_c29924/f1p3/2108,i1_LQ_Rweevil_c29610/f1p4/1799,i0_LQ_Rweevil_c58216/f1p0/679,i2_LQ_Rweevil_c8751/f1p23/3093,i2_LQ_Rweevil_c25688/f1p13/2199,i0_LQ_Rweevil_c30759/f1p0/656,i1_LQ_Rweevil_c80080/f1p0/1860,i4_LQ_Rweevil_c13238/f1p0/4044,i6_LQ_Rweevil_c825/f1p16/6429,…	11	i6_LQ_Rweevil_c1261/f1p0/6409,i2_HQ_Rweevil_c73812/f71p8/2921,i2_HQ_Rweevil_c148481/f56p0/2908,i2_LQ_Rweevil_c71487/f1p3/2094,i1_LQ_Rweevil_c34927/f1p56/1047,i3_LQ_Rweevil_c15089/f1p1/3036,i2_LQ_Rweevil_c104991/f1p4/2181,i2_LQ_Rweevil_c87523/f1p5/2582,i2_HQ_Rweevil_c60499/f2p18/3879,i2_LQ_Rweevil_c108641/f1p22/2954,i1_HQ_Rweevil_c121140/f49p0/1116
GO:0046129	purine ribonucleoside biosynthetic process	biological_process	0.013124	0.32642	35	3203	210	27707	24	i2_LQ_Rweevil_c82705/f1p23/2501,i2_LQ_Rweevil_c14630/f1p6/2131,i1_LQ_Rweevil_c34353/f1p0/1023,i0_LQ_Rweevil_c23175/f1p7/817,i0_LQ_Rweevil_c37758/f1p0/987,i0_LQ_Rweevil_c91019/f2p0/884,i0_LQ_Rweevil_c26298/f1p0/337,i1_LQ_Rweevil_c23034/f1p5/1677,i1_LQ_Rweevil_c80080/f1p0/1860,i0_LQ_Rweevil_c30759/f1p0/656,i6_LQ_Rweevil_c825/f1p16/6429,i4_LQ_Rweevil_c7548/f1p0/4229,i4_LQ_Rweevil_c13238/f1p0/4044,i3…	11	i2_LQ_Rweevil_c108641/f1p22/2954,i1_HQ_Rweevil_c121140/f49p0/1116,i1_LQ_Rweevil_c34927/f1p56/1047,i2_LQ_Rweevil_c104991/f1p4/2181,i3_LQ_Rweevil_c15089/f1p1/3036,i2_LQ_Rweevil_c87523/f1p5/2582,i2_HQ_Rweevil_c60499/f2p18/3879,i2_LQ_Rweevil_c71487/f1p3/2094,i2_HQ_Rweevil_c148481/f56p0/2908,i2_HQ_Rweevil_c73812/f71p8/2921,i6_LQ_Rweevil_c1261/f1p0/6409
GO:0010324	membrane invagination	biological_process	0.01314	0.32642	3	3203	5	27707	3	i3_LQ_Rweevil_c26421/f1p0/3357,i2_LQ_Rweevil_c41102/f1p0/2205,i2_LQ_Rweevil_c78683/f1p0/2308	0
GO:0016237	microautophagy	biological_process	0.01314	0.32642	3	3203	5	27707	3	i2_LQ_Rweevil_c41102/f1p0/2205,i3_LQ_Rweevil_c26421/f1p0/3357,i2_LQ_Rweevil_c78683/f1p0/2308	0
GO:0034448	EGO complex	cellular_component	0.01314	0.32642	3	3203	5	27707	3	i3_LQ_Rweevil_c26421/f1p0/3357,i2_LQ_Rweevil_c41102/f1p0/2205,i2_LQ_Rweevil_c78683/f1p0/2308	0
GO:1902534	single-organism membrane invagination	biological_process	0.01314	0.32642	3	3203	5	27707	3	i2_LQ_Rweevil_c78683/f1p0/2308,i2_LQ_Rweevil_c41102/f1p0/2205,i3_LQ_Rweevil_c26421/f1p0/3357	0
GO:0009100	glycoprotein metabolic process	biological_process	0.01317	0.32642	21	3203	109	27707	1	i5_LQ_Rweevil_c2078/f1p3/5390	20	i1_LQ_Rweevil_c51913/f1p0/1998,i2_LQ_Rweevil_c44493/f1p1/2711,i2_HQ_Rweevil_c15406/f49p3/2777,i2_LQ_Rweevil_c106679/f1p92/2418,i3_LQ_Rweevil_c10644/f1p3/3279,i2_LQ_Rweevil_c52506/f42p0/2174,i3_HQ_Rweevil_c1347/f10p0/3386,i2_LQ_Rweevil_c62523/f1p0/2659,i1_LQ_Rweevil_c48436/f1p0/1994,i4_LQ_Rweevil_c1738/f2p0/4201,i2_LQ_Rweevil_c13688/f1p2/2579,i2_LQ_Rweevil_c84441/f1p8/2845,i2_LQ_Rweevil_c85235/f1p…
GO:0043169	cation binding	molecular_function	0.013204	0.32642	548	3203	4352	27707	278	i3_LQ_Rweevil_c29869/f1p0/3050,i2_LQ_Rweevil_c22701/f1p1/2613,i2_LQ_Rweevil_c59400/f1p1/2255,i2_LQ_Rweevil_c21553/f1p8/2663,i4_HQ_Rweevil_c13507/f5p0/4318,i4_LQ_Rweevil_c3157/f1p0/4835,i2_LQ_Rweevil_c153769/f1p8/2884,i2_LQ_Rweevil_c37930/f1p10/2276,i2_HQ_Rweevil_c76928/f2p3/2874,i3_LQ_Rweevil_c23318/f1p0/3484,i2_LQ_Rweevil_c111399/f1p3/1659,i1_LQ_Rweevil_c8754/f1p0/1885,i4_HQ_Rweevil_c1828/f2p0/4…	270	i3_LQ_Rweevil_c8675/f1p0/3317,i2_LQ_Rweevil_c88182/f1p14/2130,i1_HQ_Rweevil_c1480/f4p0/1212,i4_LQ_Rweevil_c7820/f1p0/4446,i1_LQ_Rweevil_c146834/f1p0/1017,i1_LQ_Rweevil_c56388/f1p0/1048,i8_LQ_Rweevil_c318/f1p0/8294,i4_HQ_Rweevil_c562/f12p0/4465,i4_LQ_Rweevil_c6868/f1p1/4672,i2_LQ_Rweevil_c80615/f1p90/3921,i1_LQ_Rweevil_c52528/f1p0/1131,i3_HQ_Rweevil_c13511/f2p6/3526,i5_LQ_Rweevil_c1587/f1p0/5064,i…
GO:0034220	ion transmembrane transport	biological_process	0.013252	0.32642	82	3203	561	27707	52	i4_LQ_Rweevil_c8323/f1p263/4781,i0_LQ_Rweevil_c23142/f1p0/848,i2_HQ_Rweevil_c139476/f2p77/2061,i3_LQ_Rweevil_c26356/f1p0/3096,i2_LQ_Rweevil_c82705/f1p23/2501,i3_LQ_Rweevil_c41812/f1p0/3663,i0_LQ_Rweevil_c91019/f2p0/884,i0_LQ_Rweevil_c32816/f1p0/906,i0_LQ_Rweevil_c37758/f1p0/987,i4_HQ_Rweevil_c1588/f2p0/4834,i6_LQ_Rweevil_c1820/f1p2/6291,i0_LQ_Rweevil_c23175/f1p7/817,i3_LQ_Rweevil_c7114/f1p0/3398,…	30	i1_LQ_Rweevil_c120821/f1p3/1109,i2_LQ_Rweevil_c26338/f1p0/2901,i2_LQ_Rweevil_c22765/f1p28/2229,i2_LQ_Rweevil_c87523/f1p5/2582,i2_HQ_Rweevil_c60499/f2p18/3879,i0_LQ_Rweevil_c22873/f1p0/943,i2_LQ_Rweevil_c37484/f1p13/2963,i3_LQ_Rweevil_c15089/f1p1/3036,i1_HQ_Rweevil_c121140/f49p0/1116,i2_HQ_Rweevil_c51491/f15p5/2116,i2_LQ_Rweevil_c108641/f1p22/2954,i2_LQ_Rweevil_c161817/f1p2/2043,i2_LQ_Rweevil_c371…
GO:0009141	nucleoside triphosphate metabolic process	biological_process	0.013419	0.32642	42	3203	261	27707	30	i0_LQ_Rweevil_c23175/f1p7/817,i0_LQ_Rweevil_c37758/f1p0/987,i4_HQ_Rweevil_c1158/f4p0/4431,i0_LQ_Rweevil_c91019/f2p0/884,i0_LQ_Rweevil_c26298/f1p0/337,i2_LQ_Rweevil_c36370/f1p27/2340,i1_LQ_Rweevil_c23034/f1p5/1677,i2_LQ_Rweevil_c82705/f1p23/2501,i5_HQ_Rweevil_c557/f2p0/5530,i0_LQ_Rweevil_c33680/f1p0/515,i1_LQ_Rweevil_c34353/f1p0/1023,i1_LQ_Rweevil_c29610/f1p4/1799,i2_LQ_Rweevil_c153769/f1p8/2884,i…	12	i1_HQ_Rweevil_c96480/f7p0/1646,i2_LQ_Rweevil_c108641/f1p22/2954,i1_HQ_Rweevil_c121140/f49p0/1116,i1_LQ_Rweevil_c34927/f1p56/1047,i3_LQ_Rweevil_c15089/f1p1/3036,i2_LQ_Rweevil_c87523/f1p5/2582,i2_HQ_Rweevil_c60499/f2p18/3879,i2_HQ_Rweevil_c148481/f56p0/2908,i6_LQ_Rweevil_c1261/f1p0/6409,i2_HQ_Rweevil_c73812/f71p8/2921,i2_LQ_Rweevil_c24555/f1p5/2795,i2_LQ_Rweevil_c85130/f1p0/2686
GO:0009144	purine nucleoside triphosphate metabolic process	biological_process	0.013419	0.32642	42	3203	261	27707	30	i0_LQ_Rweevil_c72444/f1p0/790,i3_LQ_Rweevil_c23430/f1p4/3618,i4_LQ_Rweevil_c13238/f1p0/4044,i4_LQ_Rweevil_c7548/f1p0/4229,i6_LQ_Rweevil_c825/f1p16/6429,i0_LQ_Rweevil_c30759/f1p0/656,i1_LQ_Rweevil_c80080/f1p0/1860,i2_LQ_Rweevil_c25688/f1p13/2199,i2_LQ_Rweevil_c8751/f1p23/3093,i4_LQ_Rweevil_c7765/f1p0/4625,i0_LQ_Rweevil_c58216/f1p0/679,i2_LQ_Rweevil_c153769/f1p8/2884,i1_LQ_Rweevil_c29610/f1p4/1799,…	12	i2_LQ_Rweevil_c85130/f1p0/2686,i2_LQ_Rweevil_c24555/f1p5/2795,i2_HQ_Rweevil_c148481/f56p0/2908,i6_LQ_Rweevil_c1261/f1p0/6409,i2_HQ_Rweevil_c73812/f71p8/2921,i1_HQ_Rweevil_c121140/f49p0/1116,i2_LQ_Rweevil_c108641/f1p22/2954,i2_HQ_Rweevil_c60499/f2p18/3879,i2_LQ_Rweevil_c87523/f1p5/2582,i3_LQ_Rweevil_c15089/f1p1/3036,i1_LQ_Rweevil_c34927/f1p56/1047,i1_HQ_Rweevil_c96480/f7p0/1646
GO:0009199	ribonucleoside triphosphate metabolic process	biological_process	0.013419	0.32642	42	3203	261	27707	30	i0_LQ_Rweevil_c23175/f1p7/817,i0_LQ_Rweevil_c91019/f2p0/884,i0_LQ_Rweevil_c26298/f1p0/337,i4_HQ_Rweevil_c1158/f4p0/4431,i0_LQ_Rweevil_c37758/f1p0/987,i1_LQ_Rweevil_c23034/f1p5/1677,i2_LQ_Rweevil_c36370/f1p27/2340,i2_LQ_Rweevil_c82705/f1p23/2501,i5_HQ_Rweevil_c557/f2p0/5530,i0_LQ_Rweevil_c33680/f1p0/515,i1_LQ_Rweevil_c34353/f1p0/1023,i1_LQ_Rweevil_c29610/f1p4/1799,i2_LQ_Rweevil_c153769/f1p8/2884,i…	12	i1_HQ_Rweevil_c96480/f7p0/1646,i1_HQ_Rweevil_c121140/f49p0/1116,i2_LQ_Rweevil_c108641/f1p22/2954,i1_LQ_Rweevil_c34927/f1p56/1047,i2_LQ_Rweevil_c87523/f1p5/2582,i2_HQ_Rweevil_c60499/f2p18/3879,i3_LQ_Rweevil_c15089/f1p1/3036,i2_HQ_Rweevil_c148481/f56p0/2908,i2_HQ_Rweevil_c73812/f71p8/2921,i6_LQ_Rweevil_c1261/f1p0/6409,i2_LQ_Rweevil_c85130/f1p0/2686,i2_LQ_Rweevil_c24555/f1p5/2795
GO:0009205	purine ribonucleoside triphosphate metabolic process	biological_process	0.013419	0.32642	42	3203	261	27707	30	i2_LQ_Rweevil_c153769/f1p8/2884,i1_LQ_Rweevil_c29610/f1p4/1799,i0_LQ_Rweevil_c58216/f1p0/679,i4_LQ_Rweevil_c7765/f1p0/4625,i2_HQ_Rweevil_c78235/f2p2/2278,i2_LQ_Rweevil_c58898/f1p0/2662,i0_LQ_Rweevil_c32571/f1p0/845,i2_LQ_Rweevil_c29924/f1p3/2108,i1_LQ_Rweevil_c5955/f1p0/1950,i5_LQ_Rweevil_c3832/f1p6/5509,i4_LQ_Rweevil_c13238/f1p0/4044,i6_LQ_Rweevil_c825/f1p16/6429,i4_LQ_Rweevil_c7548/f1p0/4229,i1…	12	i2_HQ_Rweevil_c148481/f56p0/2908,i6_LQ_Rweevil_c1261/f1p0/6409,i2_HQ_Rweevil_c73812/f71p8/2921,i2_LQ_Rweevil_c85130/f1p0/2686,i2_LQ_Rweevil_c24555/f1p5/2795,i1_HQ_Rweevil_c96480/f7p0/1646,i1_HQ_Rweevil_c121140/f49p0/1116,i2_LQ_Rweevil_c108641/f1p22/2954,i1_LQ_Rweevil_c34927/f1p56/1047,i2_LQ_Rweevil_c87523/f1p5/2582,i2_HQ_Rweevil_c60499/f2p18/3879,i3_LQ_Rweevil_c15089/f1p1/3036
GO:0031341	regulation of cell killing	biological_process	0.013474	0.32642	2	3203	2	27707	2	i2_HQ_Rweevil_c91620/f2p0/2057,i2_HQ_Rweevil_c60720/f3p2/2422	0
GO:0005244	voltage-gated ion channel activity	molecular_function	0.013908	0.33221	14	3203	64	27707	11	i3_HQ_Rweevil_c1899/f3p3/3226,i4_LQ_Rweevil_c4591/f1p0/4277,i6_LQ_Rweevil_c1924/f1p6/6892,i1_LQ_Rweevil_c8453/f1p2/1955,i3_LQ_Rweevil_c4368/f1p34/3174,i5_LQ_Rweevil_c3209/f1p0/5482,i3_LQ_Rweevil_c33769/f1p0/3187,i1_LQ_Rweevil_c8309/f1p0/1805,i6_LQ_Rweevil_c1820/f1p2/6291,i6_LQ_Rweevil_c392/f1p0/6215,i3_LQ_Rweevil_c36265/f1p0/3285	3	i2_LQ_Rweevil_c88015/f1p8/2583,i3_HQ_Rweevil_c13063/f2p0/3444,i2_HQ_Rweevil_c51491/f15p5/2116
GO:0022832	voltage-gated channel activity	molecular_function	0.013908	0.33221	14	3203	64	27707	11	i3_LQ_Rweevil_c4368/f1p34/3174,i1_LQ_Rweevil_c8453/f1p2/1955,i6_LQ_Rweevil_c1924/f1p6/6892,i4_LQ_Rweevil_c4591/f1p0/4277,i3_HQ_Rweevil_c1899/f3p3/3226,i6_LQ_Rweevil_c1820/f1p2/6291,i6_LQ_Rweevil_c392/f1p0/6215,i3_LQ_Rweevil_c36265/f1p0/3285,i3_LQ_Rweevil_c33769/f1p0/3187,i1_LQ_Rweevil_c8309/f1p0/1805,i5_LQ_Rweevil_c3209/f1p0/5482	3	i2_LQ_Rweevil_c88015/f1p8/2583,i3_HQ_Rweevil_c13063/f2p0/3444,i2_HQ_Rweevil_c51491/f15p5/2116
GO:0005856	cytoskeleton	cellular_component	0.013951	0.33221	111	3203	781	27707	74	i1_LQ_Rweevil_c67604/f1p0/1751,i2_LQ_Rweevil_c19251/f1p2/2262,i1_LQ_Rweevil_c41303/f1p0/1531,i3_LQ_Rweevil_c4701/f1p1/3242,i3_LQ_Rweevil_c24250/f1p0/3313,i1_LQ_Rweevil_c6852/f1p0/1890,i3_LQ_Rweevil_c4186/f1p0/3292,i3_LQ_Rweevil_c27148/f1p0/3652,i0_LQ_Rweevil_c14918/f1p0/900,i2_LQ_Rweevil_c48973/f1p10/2103,i2_LQ_Rweevil_c83278/f1p42/2770,i2_LQ_Rweevil_c123785/f1p119/1867,i2_HQ_Rweevil_c139476/f2p7…	37	i3_LQ_Rweevil_c9525/f1p0/3755,i2_HQ_Rweevil_c1904/f10p3/2685,i2_LQ_Rweevil_c115091/f1p20/2356,i1_LQ_Rweevil_c27253/f1p5/1990,i4_LQ_Rweevil_c5941/f1p0/4434,i2_LQ_Rweevil_c3153/f1p20/2545,i1_LQ_Rweevil_c52460/f1p0/1638,i2_LQ_Rweevil_c57117/f1p11/2230,i2_HQ_Rweevil_c31737/f28p1/2264,i1_HQ_Rweevil_c1101/f24p0/1812,i3_LQ_Rweevil_c12587/f1p0/3810,i2_LQ_Rweevil_c31521/f1p17/2037,i2_LQ_Rweevil_c108261/f1…
GO:0006753	nucleoside phosphate metabolic process	biological_process	0.014489	0.34306	61	3203	404	27707	41	i0_LQ_Rweevil_c72444/f1p0/790,i3_LQ_Rweevil_c23430/f1p4/3618,i2_LQ_Rweevil_c86368/f1p0/2191,i4_LQ_Rweevil_c13238/f1p0/4044,i4_LQ_Rweevil_c7548/f1p0/4229,i6_LQ_Rweevil_c825/f1p16/6429,i0_LQ_Rweevil_c30759/f1p0/656,i1_LQ_Rweevil_c80080/f1p0/1860,i2_LQ_Rweevil_c39475/f1p2/2722,i2_LQ_Rweevil_c25688/f1p13/2199,i2_HQ_Rweevil_c54608/f2p4/2854,i2_LQ_Rweevil_c8751/f1p23/3093,i1_LQ_Rweevil_c7342/f1p0/1781,…	20	i2_LQ_Rweevil_c71487/f1p3/2094,i2_LQ_Rweevil_c85130/f1p0/2686,i2_LQ_Rweevil_c24555/f1p5/2795,i3_LQ_Rweevil_c7589/f1p21/3380,i1_HQ_Rweevil_c52526/f2p0/1825,i1_HQ_Rweevil_c13339/f3p12/1798,i2_HQ_Rweevil_c148481/f56p0/2908,i6_LQ_Rweevil_c1261/f1p0/6409,i2_HQ_Rweevil_c73812/f71p8/2921,i1_HQ_Rweevil_c121140/f49p0/1116,i2_LQ_Rweevil_c108641/f1p22/2954,i2_LQ_Rweevil_c87523/f1p5/2582,i2_HQ_Rweevil_c60499…
GO:1902495	transmembrane transporter complex	cellular_component	0.015288	0.35795	7	3203	24	27707	6	i6_LQ_Rweevil_c392/f1p0/6215,i6_LQ_Rweevil_c1820/f1p2/6291,i1_LQ_Rweevil_c8453/f1p2/1955,i5_LQ_Rweevil_c3209/f1p0/5482,i4_LQ_Rweevil_c4591/f1p0/4277,i1_LQ_Rweevil_c8309/f1p0/1805	1	i2_HQ_Rweevil_c51491/f15p5/2116
GO:1990351	transporter complex	cellular_component	0.015288	0.35795	7	3203	24	27707	6	i6_LQ_Rweevil_c1820/f1p2/6291,i6_LQ_Rweevil_c392/f1p0/6215,i1_LQ_Rweevil_c8453/f1p2/1955,i5_LQ_Rweevil_c3209/f1p0/5482,i4_LQ_Rweevil_c4591/f1p0/4277,i1_LQ_Rweevil_c8309/f1p0/1805	1	i2_HQ_Rweevil_c51491/f15p5/2116
GO:0051087	chaperone binding	molecular_function	0.015452	0.35978	13	3203	59	27707	6	i1_LQ_Rweevil_c2645/f1p4/1952,i2_LQ_Rweevil_c14585/f1p7/2051,i1_LQ_Rweevil_c14992/f1p10/1123,i0_LQ_Rweevil_c52297/f1p0/776,i3_LQ_Rweevil_c3989/f1p0/3528,i2_HQ_Rweevil_c8353/f6p17/2950	7	i2_LQ_Rweevil_c79018/f1p1/2158,i2_LQ_Rweevil_c115091/f1p20/2356,i3_HQ_Rweevil_c2371/f3p4/3348,i2_LQ_Rweevil_c43754/f1p0/2994,i1_LQ_Rweevil_c81808/f1p31/1629,i3_LQ_Rweevil_c26468/f1p12/3522,i3_LQ_Rweevil_c28594/f1p0/3183
GO:0080134	regulation of response to stress	biological_process	0.016384	0.37937	10	3203	41	27707	9	i3_HQ_Rweevil_c40635/f18p0/3497,i2_LQ_Rweevil_c98680/f1p11/2728,i1_LQ_Rweevil_c30819/f1p9/1646,i2_LQ_Rweevil_c109811/f1p22/2985,i2_LQ_Rweevil_c13738/f1p11/2653,i3_LQ_Rweevil_c24154/f1p0/3513,i2_LQ_Rweevil_c59920/f1p1/2934,i6_LQ_Rweevil_c1852/f1p0/6241,i3_LQ_Rweevil_c28121/f1p0/3628	1	i2_LQ_Rweevil_c109220/f1p20/2862
GO:0030001	metal ion transport	biological_process	0.016766	0.38607	66	3203	442	27707	46	i4_LQ_Rweevil_c4609/f1p0/4755,i3_LQ_Rweevil_c36265/f1p0/3285,i5_LQ_Rweevil_c615/f1p0/5681,i6_LQ_Rweevil_c1913/f1p0/6208,i5_LQ_Rweevil_c3893/f1p6/5592,i2_LQ_Rweevil_c13338/f1p4/2300,i9_LQ_Rweevil_c83/f1p0/9799,i7_LQ_Rweevil_c1012/f1p0/7162,i1_LQ_Rweevil_c8453/f1p2/1955,i1_LQ_Rweevil_c7216/f1p0/1761,i1_LQ_Rweevil_c6630/f1p0/1720,i5_LQ_Rweevil_c3578/f1p0/5624,i1_LQ_Rweevil_c30819/f1p9/1646,i10_LQ_Rw…	20	i4_LQ_Rweevil_c7820/f1p0/4446,i1_LQ_Rweevil_c53458/f1p0/1733,i2_LQ_Rweevil_c59048/f1p0/2825,i2_LQ_Rweevil_c87508/f1p0/2164,i2_LQ_Rweevil_c112147/f1p2/2308,i1_LQ_Rweevil_c5140/f4p8/1500,i1_HQ_Rweevil_c2167/f8p0/1791,i2_HQ_Rweevil_c51491/f15p5/2116,i3_LQ_Rweevil_c25589/f1p0/3141,i1_HQ_Rweevil_c51472/f2p0/1636,i2_LQ_Rweevil_c37484/f1p13/2963,i0_LQ_Rweevil_c22873/f1p0/943,i1_LQ_Rweevil_c77054/f1p0/15…
GO:0030695	GTPase regulator activity	molecular_function	0.017926	0.41054	22	3203	119	27707	4	i4_LQ_Rweevil_c2959/f1p3/4234,i2_LQ_Rweevil_c61004/f1p7/2613,i1_LQ_Rweevil_c46000/f1p0/2003,i2_LQ_Rweevil_c108705/f1p2/2381	18	i0_LQ_Rweevil_c7383/f1p0/827,i4_LQ_Rweevil_c8653/f1p0/4134,i0_LQ_Rweevil_c23030/f1p401/816,i2_LQ_Rweevil_c45279/f1p3/1962,i3_HQ_Rweevil_c1520/f5p5/3162,i1_LQ_Rweevil_c43311/f1p0/1185,i5_LQ_Rweevil_c3800/f1p0/5358,i1_LQ_Rweevil_c15614/f1p0/1033,i1_LQ_Rweevil_c41478/f1p2/1226,i1_LQ_Rweevil_c45622/f1p0/1671,i2_LQ_Rweevil_c111421/f1p10/2449,i2_LQ_Rweevil_c49935/f1p21/2122,i2_LQ_Rweevil_c84779/f1p14/2…
GO:0017038	protein import	biological_process	0.01878	0.42326	38	3203	233	27707	15	i3_LQ_Rweevil_c11141/f1p3/3205,i1_LQ_Rweevil_c67077/f1p0/1989,i8_LQ_Rweevil_c270/f1p0/8923,i5_LQ_Rweevil_c1823/f1p0/5203,i2_LQ_Rweevil_c55224/f1p4/2604,i4_LQ_Rweevil_c4177/f1p1/4420,i4_LQ_Rweevil_c6287/f1p2/4650,i5_LQ_Rweevil_c1281/f1p0/5711,i5_LQ_Rweevil_c1162/f1p0/5267,i1_LQ_Rweevil_c50155/f1p1/1754,i3_LQ_Rweevil_c24250/f1p0/3313,i3_LQ_Rweevil_c4988/f1p0/3263,i1_LQ_Rweevil_c4272/f2p0/1985,i2_LQ…	23	i3_LQ_Rweevil_c27717/f1p0/3741,i2_LQ_Rweevil_c82722/f1p0/2507,i3_HQ_Rweevil_c1882/f5p0/3217,i2_LQ_Rweevil_c88626/f1p2/2735,i2_LQ_Rweevil_c116774/f1p1/2668,i2_LQ_Rweevil_c98093/f1p3/1910,i6_LQ_Rweevil_c2231/f1p0/6028,i2_LQ_Rweevil_c38367/f1p5/2852,i1_LQ_Rweevil_c43311/f1p0/1185,i3_HQ_Rweevil_c31743/f11p0/3123,i2_HQ_Rweevil_c2548/f5p6/2424,i2_LQ_Rweevil_c85150/f1p6/2680,i6_LQ_Rweevil_c2349/f1p2/601…
GO:0016651	oxidoreductase activity, acting on NAD(P)H	molecular_function	0.018907	0.42326	16	3203	82	27707	13	i0_LQ_Rweevil_c51893/f1p0/377,i4_LQ_Rweevil_c7765/f1p0/4625,i3_LQ_Rweevil_c33749/f1p0/3389,i2_LQ_Rweevil_c105435/f1p36/2773,i5_LQ_Rweevil_c4663/f1p693/5600,i0_HQ_Rweevil_c63451/f2p0/224,i2_HQ_Rweevil_c21274/f2p3/2707,i0_HQ_Rweevil_c721/f11p0/526,i0_HQ_Rweevil_c47333/f11p9/489,i1_LQ_Rweevil_c145427/f1p0/1018,i0_LQ_Rweevil_c7065/f1p27/837,i0_LQ_Rweevil_c33680/f1p0/515,i1_LQ_Rweevil_c6630/f1p0/1720	3	i4_LQ_Rweevil_c3352/f1p0/4367,i3_LQ_Rweevil_c26517/f1p0/3811,i1_LQ_Rweevil_c3883/f3p1/1829
GO:0009163	nucleoside biosynthetic process	biological_process	0.018986	0.42326	35	3203	216	27707	24	i0_LQ_Rweevil_c32571/f1p0/845,i2_HQ_Rweevil_c78235/f2p2/2278,i2_LQ_Rweevil_c58898/f1p0/2662,i1_LQ_Rweevil_c5955/f1p0/1950,i2_LQ_Rweevil_c29924/f1p3/2108,i1_LQ_Rweevil_c29610/f1p4/1799,i0_LQ_Rweevil_c58216/f1p0/679,i2_LQ_Rweevil_c8751/f1p23/3093,i2_LQ_Rweevil_c25688/f1p13/2199,i1_LQ_Rweevil_c80080/f1p0/1860,i0_LQ_Rweevil_c30759/f1p0/656,i4_LQ_Rweevil_c13238/f1p0/4044,i4_LQ_Rweevil_c7548/f1p0/4229,…	11	i6_LQ_Rweevil_c1261/f1p0/6409,i2_HQ_Rweevil_c73812/f71p8/2921,i2_HQ_Rweevil_c148481/f56p0/2908,i2_LQ_Rweevil_c71487/f1p3/2094,i1_LQ_Rweevil_c34927/f1p56/1047,i3_LQ_Rweevil_c15089/f1p1/3036,i2_LQ_Rweevil_c104991/f1p4/2181,i2_LQ_Rweevil_c87523/f1p5/2582,i2_HQ_Rweevil_c60499/f2p18/3879,i2_LQ_Rweevil_c108641/f1p22/2954,i1_HQ_Rweevil_c121140/f49p0/1116
GO:0042455	ribonucleoside biosynthetic process	biological_process	0.018986	0.42326	35	3203	216	27707	24	i2_LQ_Rweevil_c25688/f1p13/2199,i2_LQ_Rweevil_c8751/f1p23/3093,i0_LQ_Rweevil_c72444/f1p0/790,i3_LQ_Rweevil_c23430/f1p4/3618,i0_LQ_Rweevil_c30759/f1p0/656,i1_LQ_Rweevil_c80080/f1p0/1860,i4_LQ_Rweevil_c13238/f1p0/4044,i4_LQ_Rweevil_c7548/f1p0/4229,i6_LQ_Rweevil_c825/f1p16/6429,i1_LQ_Rweevil_c5955/f1p0/1950,i2_LQ_Rweevil_c29924/f1p3/2108,i0_LQ_Rweevil_c32571/f1p0/845,i2_HQ_Rweevil_c78235/f2p2/2278,i…	11	i2_LQ_Rweevil_c71487/f1p3/2094,i6_LQ_Rweevil_c1261/f1p0/6409,i2_HQ_Rweevil_c73812/f71p8/2921,i2_HQ_Rweevil_c148481/f56p0/2908,i3_LQ_Rweevil_c15089/f1p1/3036,i2_LQ_Rweevil_c104991/f1p4/2181,i2_HQ_Rweevil_c60499/f2p18/3879,i2_LQ_Rweevil_c87523/f1p5/2582,i1_LQ_Rweevil_c34927/f1p56/1047,i2_LQ_Rweevil_c108641/f1p22/2954,i1_HQ_Rweevil_c121140/f49p0/1116
GO:1901659	glycosyl compound biosynthetic process	biological_process	0.018986	0.42326	35	3203	216	27707	24	i2_LQ_Rweevil_c8751/f1p23/3093,i2_LQ_Rweevil_c25688/f1p13/2199,i1_LQ_Rweevil_c80080/f1p0/1860,i0_LQ_Rweevil_c30759/f1p0/656,i4_LQ_Rweevil_c7548/f1p0/4229,i6_LQ_Rweevil_c825/f1p16/6429,i4_LQ_Rweevil_c13238/f1p0/4044,i3_LQ_Rweevil_c23430/f1p4/3618,i0_LQ_Rweevil_c72444/f1p0/790,i0_LQ_Rweevil_c32571/f1p0/845,i2_LQ_Rweevil_c58898/f1p0/2662,i2_HQ_Rweevil_c78235/f2p2/2278,i1_LQ_Rweevil_c5955/f1p0/1950,i…	11	i2_LQ_Rweevil_c71487/f1p3/2094,i2_HQ_Rweevil_c73812/f71p8/2921,i6_LQ_Rweevil_c1261/f1p0/6409,i2_HQ_Rweevil_c148481/f56p0/2908,i1_LQ_Rweevil_c34927/f1p56/1047,i2_LQ_Rweevil_c104991/f1p4/2181,i3_LQ_Rweevil_c15089/f1p1/3036,i2_HQ_Rweevil_c60499/f2p18/3879,i2_LQ_Rweevil_c87523/f1p5/2582,i2_LQ_Rweevil_c108641/f1p22/2954,i1_HQ_Rweevil_c121140/f49p0/1116
GO:0072522	purine-containing compound biosynthetic process	biological_process	0.019413	0.42995	43	3203	274	27707	29	i0_LQ_Rweevil_c32571/f1p0/845,i2_HQ_Rweevil_c78235/f2p2/2278,i2_LQ_Rweevil_c58898/f1p0/2662,i1_LQ_Rweevil_c5955/f1p0/1950,i2_LQ_Rweevil_c29924/f1p3/2108,i1_LQ_Rweevil_c29610/f1p4/1799,i3_LQ_Rweevil_c25387/f1p0/3974,i0_LQ_Rweevil_c58216/f1p0/679,i1_LQ_Rweevil_c7342/f1p0/1781,i2_LQ_Rweevil_c8751/f1p23/3093,i3_LQ_Rweevil_c10769/f1p2/3605,i2_HQ_Rweevil_c54608/f2p4/2854,i2_LQ_Rweevil_c25688/f1p13/2199…	14	i2_HQ_Rweevil_c73812/f71p8/2921,i6_LQ_Rweevil_c1261/f1p0/6409,i2_HQ_Rweevil_c148481/f56p0/2908,i2_LQ_Rweevil_c71487/f1p3/2094,i2_LQ_Rweevil_c115091/f1p20/2356,i1_LQ_Rweevil_c34927/f1p56/1047,i2_LQ_Rweevil_c104991/f1p4/2181,i1_LQ_Rweevil_c124727/f1p0/1327,i3_LQ_Rweevil_c15089/f1p1/3036,i2_HQ_Rweevil_c60499/f2p18/3879,i2_LQ_Rweevil_c87523/f1p5/2582,i3_HQ_Rweevil_c7602/f4p4/3449,i2_LQ_Rweevil_c10864…
GO:0046872	metal ion binding	molecular_function	0.01966	0.42995	539	3203	4303	27707	273	i2_LQ_Rweevil_c164094/f1p2/2106,i0_HQ_Rweevil_c13469/f2p2/702,i1_LQ_Rweevil_c48928/f1p0/1848,i1_LQ_Rweevil_c35031/f1p0/1055,i2_LQ_Rweevil_c35005/f1p0/2247,i1_LQ_Rweevil_c68696/f1p0/1567,i4_LQ_Rweevil_c8523/f1p11/4381,i2_LQ_Rweevil_c61475/f1p56/2521,i0_LQ_Rweevil_c27920/f1p7/322,i1_LQ_Rweevil_c76119/f1p0/1602,i0_LQ_Rweevil_c48048/f1p0/716,i3_LQ_Rweevil_c3972/f1p1/3084,i2_LQ_Rweevil_c5466/f1p4/2461…	266	i2_HQ_Rweevil_c126048/f8p1/2450,i4_LQ_Rweevil_c3647/f1p11/4174,i2_LQ_Rweevil_c30388/f1p3/2110,i2_LQ_Rweevil_c69779/f1p0/2114,i2_HQ_Rweevil_c28022/f2p9/2426,i1_LQ_Rweevil_c45192/f1p0/1917,i2_LQ_Rweevil_c108541/f1p3/2730,i4_HQ_Rweevil_c1995/f2p0/4424,i2_LQ_Rweevil_c39760/f1p6/2218,i2_LQ_Rweevil_c17880/f1p2/2309,i5_LQ_Rweevil_c3896/f1p0/5409,i1_HQ_Rweevil_c1994/f10p0/1906,i4_HQ_Rweevil_c13689/f5p5/4…
GO:0051270	regulation of cellular component movement	biological_process	0.019697	0.42995	10	3203	42	27707	5	i1_LQ_Rweevil_c10445/f1p0/1939,i1_LQ_Rweevil_c67077/f1p0/1989,i1_LQ_Rweevil_c12972/f1p60/1762,i1_LQ_Rweevil_c50155/f1p1/1754,i2_LQ_Rweevil_c55224/f1p4/2604	5	i2_LQ_Rweevil_c58118/f1p0/2812,i0_LQ_Rweevil_c15452/f1p0/544,i7_LQ_Rweevil_c114/f1p0/7273,i11_LQ_Rweevil_c12/f1p0/11139,i3_LQ_Rweevil_c19966/f1p0/3112
GO:2000145	regulation of cell motility	biological_process	0.019697	0.42995	10	3203	42	27707	5	i1_LQ_Rweevil_c50155/f1p1/1754,i2_LQ_Rweevil_c55224/f1p4/2604,i1_LQ_Rweevil_c12972/f1p60/1762,i1_LQ_Rweevil_c10445/f1p0/1939,i1_LQ_Rweevil_c67077/f1p0/1989	5	i11_LQ_Rweevil_c12/f1p0/11139,i7_LQ_Rweevil_c114/f1p0/7273,i3_LQ_Rweevil_c19966/f1p0/3112,i0_LQ_Rweevil_c15452/f1p0/544,i2_LQ_Rweevil_c58118/f1p0/2812
GO:0006487	protein N-linked glycosylation	biological_process	0.021098	0.45815	4	3203	10	27707	1	i5_LQ_Rweevil_c2078/f1p3/5390	3	i2_LQ_Rweevil_c52506/f42p0/2174,i1_LQ_Rweevil_c68097/f1p0/1836,i2_LQ_Rweevil_c132055/f1p4/2478
GO:0060089	molecular transducer activity	molecular_function	0.021244	0.45894	101	3203	716	27707	40	i4_LQ_Rweevil_c2690/f1p8/4937,i3_LQ_Rweevil_c4701/f1p1/3242,i3_LQ_Rweevil_c36851/f1p0/3504,i2_LQ_Rweevil_c13671/f1p10/2926,i9_LQ_Rweevil_c65/f1p0/9271,i5_HQ_Rweevil_c558/f2p0/5401,i3_LQ_Rweevil_c27493/f1p3/3272,i2_LQ_Rweevil_c48973/f1p10/2103,i2_LQ_Rweevil_c42783/f1p0/2854,i1_HQ_Rweevil_c11059/f2p0/1935,i3_LQ_Rweevil_c9325/f1p0/3547,i1_LQ_Rweevil_c3611/f1p1/1639,i1_LQ_Rweevil_c67077/f1p0/1989,i4_…	61	i0_HQ_Rweevil_c8377/f7p7/526,i2_HQ_Rweevil_c39135/f2p9/2771,i1_LQ_Rweevil_c41884/f1p1/1284,i2_LQ_Rweevil_c50632/f1p3/2179,i3_LQ_Rweevil_c9525/f1p0/3755,i1_LQ_Rweevil_c122058/f1p0/1120,i3_LQ_Rweevil_c21179/f1p0/3999,i2_LQ_Rweevil_c25892/f1p5/2956,i1_LQ_Rweevil_c7905/f1p8/1413,i2_HQ_Rweevil_c21542/f2p1/2729,i5_LQ_Rweevil_c4840/f1p0/5026,i0_LQ_Rweevil_c22873/f1p0/943,i2_HQ_Rweevil_c1571/f9p32/2954,i…
GO:0055086	nucleobase-containing small molecule metabolic process	biological_process	0.021766	0.4678	74	3203	513	27707	50	i4_HQ_Rweevil_c1797/f2p0/4708,i2_HQ_Rweevil_c1999/f7p5/2976,i1_LQ_Rweevil_c23034/f1p5/1677,i0_LQ_Rweevil_c26298/f1p0/337,i1_LQ_Rweevil_c34353/f1p0/1023,i1_HQ_Rweevil_c1913/f4p0/1852,i2_LQ_Rweevil_c14630/f1p6/2131,i0_LQ_Rweevil_c33680/f1p0/515,i0_LQ_Rweevil_c30893/f1p0/641,i1_LQ_Rweevil_c7342/f1p0/1781,i1_LQ_Rweevil_c29610/f1p4/1799,i5_LQ_Rweevil_c3832/f1p6/5509,i1_LQ_Rweevil_c5955/f1p0/1950,i0_LQ…	24	i2_LQ_Rweevil_c23856/f1p0/2512,i2_HQ_Rweevil_c126080/f3p0/2144,i3_HQ_Rweevil_c7602/f4p4/3449,i1_LQ_Rweevil_c124727/f1p0/1327,i2_LQ_Rweevil_c104991/f1p4/2181,i1_LQ_Rweevil_c34927/f1p56/1047,i2_HQ_Rweevil_c148481/f56p0/2908,i6_LQ_Rweevil_c1261/f1p0/6409,i2_HQ_Rweevil_c73812/f71p8/2921,i2_LQ_Rweevil_c24555/f1p5/2795,i2_LQ_Rweevil_c85130/f1p0/2686,i1_HQ_Rweevil_c52526/f2p0/1825,i2_LQ_Rweevil_c115091/…
GO:0006163	purine nucleotide metabolic process	biological_process	0.022171	0.47031	52	3203	344	27707	35	i5_HQ_Rweevil_c557/f2p0/5530,i2_LQ_Rweevil_c82705/f1p23/2501,i1_LQ_Rweevil_c34353/f1p0/1023,i2_LQ_Rweevil_c14630/f1p6/2131,i0_LQ_Rweevil_c33680/f1p0/515,i0_LQ_Rweevil_c30893/f1p0/641,i0_LQ_Rweevil_c23175/f1p7/817,i1_LQ_Rweevil_c23034/f1p5/1677,i2_LQ_Rweevil_c36370/f1p27/2340,i0_LQ_Rweevil_c91019/f2p0/884,i0_LQ_Rweevil_c26298/f1p0/337,i0_LQ_Rweevil_c37758/f1p0/987,i4_HQ_Rweevil_c1158/f4p0/4431,i0_…	17	i1_HQ_Rweevil_c121140/f49p0/1116,i2_LQ_Rweevil_c108641/f1p22/2954,i2_LQ_Rweevil_c87523/f1p5/2582,i2_HQ_Rweevil_c60499/f2p18/3879,i1_LQ_Rweevil_c124727/f1p0/1327,i3_LQ_Rweevil_c15089/f1p1/3036,i2_LQ_Rweevil_c104991/f1p4/2181,i1_LQ_Rweevil_c34927/f1p56/1047,i2_LQ_Rweevil_c115091/f1p20/2356,i1_HQ_Rweevil_c96480/f7p0/1646,i2_LQ_Rweevil_c71487/f1p3/2094,i2_LQ_Rweevil_c85130/f1p0/2686,i2_LQ_Rweevil_c24…
GO:0009101	glycoprotein biosynthetic process	biological_process	0.022493	0.47031	19	3203	101	27707	1	i5_LQ_Rweevil_c2078/f1p3/5390	18	i2_HQ_Rweevil_c15406/f49p3/2777,i2_LQ_Rweevil_c106679/f1p92/2418,i2_LQ_Rweevil_c44493/f1p1/2711,i2_LQ_Rweevil_c52506/f42p0/2174,i3_LQ_Rweevil_c10644/f1p3/3279,i1_LQ_Rweevil_c48436/f1p0/1994,i4_LQ_Rweevil_c1738/f2p0/4201,i2_LQ_Rweevil_c62523/f1p0/2659,i3_HQ_Rweevil_c1347/f10p0/3386,i2_LQ_Rweevil_c13688/f1p2/2579,i2_LQ_Rweevil_c9725/f1p7/2819,i2_LQ_Rweevil_c84441/f1p8/2845,i2_LQ_Rweevil_c85235/f1p3…
GO:0004411	homogentisate 1,2-dioxygenase activity	molecular_function	0.022697	0.47031	5	3203	15	27707	5	i1_LQ_Rweevil_c11458/f1p0/1570,i3_LQ_Rweevil_c6668/f1p0/3161,i2_LQ_Rweevil_c25225/f1p8/2143,i4_LQ_Rweevil_c5997/f1p1/4781,i1_LQ_Rweevil_c6712/f1p0/1175	0
GO:0006558	L-phenylalanine metabolic process	biological_process	0.022697	0.47031	5	3203	15	27707	5	i4_LQ_Rweevil_c5997/f1p1/4781,i1_LQ_Rweevil_c6712/f1p0/1175,i1_LQ_Rweevil_c11458/f1p0/1570,i3_LQ_Rweevil_c6668/f1p0/3161,i2_LQ_Rweevil_c25225/f1p8/2143	0
GO:0006559	L-phenylalanine catabolic process	biological_process	0.022697	0.47031	5	3203	15	27707	5	i4_LQ_Rweevil_c5997/f1p1/4781,i1_LQ_Rweevil_c6712/f1p0/1175,i3_LQ_Rweevil_c6668/f1p0/3161,i1_LQ_Rweevil_c11458/f1p0/1570,i2_LQ_Rweevil_c25225/f1p8/2143	0
GO:1902221	erythrose 4-phosphate/phosphoenolpyruvate family amino acid metabolic process	biological_process	0.022697	0.47031	5	3203	15	27707	5	i1_LQ_Rweevil_c6712/f1p0/1175,i4_LQ_Rweevil_c5997/f1p1/4781,i2_LQ_Rweevil_c25225/f1p8/2143,i3_LQ_Rweevil_c6668/f1p0/3161,i1_LQ_Rweevil_c11458/f1p0/1570	0
GO:1902222	erythrose 4-phosphate/phosphoenolpyruvate family amino acid catabolic process	biological_process	0.022697	0.47031	5	3203	15	27707	5	i3_LQ_Rweevil_c6668/f1p0/3161,i1_LQ_Rweevil_c11458/f1p0/1570,i2_LQ_Rweevil_c25225/f1p8/2143,i4_LQ_Rweevil_c5997/f1p1/4781,i1_LQ_Rweevil_c6712/f1p0/1175	0
GO:0008250	oligosaccharyltransferase complex	cellular_component	0.022781	0.47031	3	3203	6	27707	1	i5_LQ_Rweevil_c2078/f1p3/5390	2	i2_LQ_Rweevil_c52506/f42p0/2174,i2_LQ_Rweevil_c132055/f1p4/2478
GO:0009126	purine nucleoside monophosphate metabolic process	biological_process	0.023117	0.47031	43	3203	277	27707	31	i2_LQ_Rweevil_c82705/f1p23/2501,i5_HQ_Rweevil_c557/f2p0/5530,i0_LQ_Rweevil_c33680/f1p0/515,i2_LQ_Rweevil_c14630/f1p6/2131,i1_LQ_Rweevil_c34353/f1p0/1023,i0_LQ_Rweevil_c23175/f1p7/817,i4_HQ_Rweevil_c1158/f4p0/4431,i0_LQ_Rweevil_c37758/f1p0/987,i0_LQ_Rweevil_c91019/f2p0/884,i0_LQ_Rweevil_c26298/f1p0/337,i2_LQ_Rweevil_c36370/f1p27/2340,i1_LQ_Rweevil_c23034/f1p5/1677,i0_LQ_Rweevil_c30759/f1p0/656,i1_…	12	i2_LQ_Rweevil_c108641/f1p22/2954,i1_HQ_Rweevil_c121140/f49p0/1116,i1_LQ_Rweevil_c34927/f1p56/1047,i3_LQ_Rweevil_c15089/f1p1/3036,i2_HQ_Rweevil_c60499/f2p18/3879,i2_LQ_Rweevil_c87523/f1p5/2582,i1_HQ_Rweevil_c96480/f7p0/1646,i2_LQ_Rweevil_c24555/f1p5/2795,i2_LQ_Rweevil_c85130/f1p0/2686,i2_HQ_Rweevil_c148481/f56p0/2908,i2_HQ_Rweevil_c73812/f71p8/2921,i6_LQ_Rweevil_c1261/f1p0/6409
GO:0009161	ribonucleoside monophosphate metabolic process	biological_process	0.023117	0.47031	43	3203	277	27707	31	i1_LQ_Rweevil_c5955/f1p0/1950,i5_LQ_Rweevil_c3832/f1p6/5509,i2_LQ_Rweevil_c29924/f1p3/2108,i0_LQ_Rweevil_c32571/f1p0/845,i2_LQ_Rweevil_c58898/f1p0/2662,i2_HQ_Rweevil_c78235/f2p2/2278,i4_LQ_Rweevil_c7765/f1p0/4625,i0_LQ_Rweevil_c58216/f1p0/679,i2_LQ_Rweevil_c153769/f1p8/2884,i1_LQ_Rweevil_c29610/f1p4/1799,i2_LQ_Rweevil_c25688/f1p13/2199,i2_LQ_Rweevil_c8751/f1p23/3093,i0_LQ_Rweevil_c72444/f1p0/790,…	12	i6_LQ_Rweevil_c1261/f1p0/6409,i2_HQ_Rweevil_c73812/f71p8/2921,i2_HQ_Rweevil_c148481/f56p0/2908,i2_LQ_Rweevil_c24555/f1p5/2795,i2_LQ_Rweevil_c85130/f1p0/2686,i1_HQ_Rweevil_c96480/f7p0/1646,i3_LQ_Rweevil_c15089/f1p1/3036,i2_HQ_Rweevil_c60499/f2p18/3879,i2_LQ_Rweevil_c87523/f1p5/2582,i1_LQ_Rweevil_c34927/f1p56/1047,i2_LQ_Rweevil_c108641/f1p22/2954,i1_HQ_Rweevil_c121140/f49p0/1116
GO:0009167	purine ribonucleoside monophosphate metabolic process	biological_process	0.023117	0.47031	43	3203	277	27707	31	i2_LQ_Rweevil_c25688/f1p13/2199,i2_LQ_Rweevil_c8751/f1p23/3093,i3_LQ_Rweevil_c23430/f1p4/3618,i0_LQ_Rweevil_c72444/f1p0/790,i6_LQ_Rweevil_c825/f1p16/6429,i4_LQ_Rweevil_c7548/f1p0/4229,i4_LQ_Rweevil_c13238/f1p0/4044,i1_LQ_Rweevil_c80080/f1p0/1860,i0_LQ_Rweevil_c30759/f1p0/656,i2_LQ_Rweevil_c29924/f1p3/2108,i1_LQ_Rweevil_c5955/f1p0/1950,i5_LQ_Rweevil_c3832/f1p6/5509,i2_HQ_Rweevil_c78235/f2p2/2278,i…	12	i2_LQ_Rweevil_c85130/f1p0/2686,i2_LQ_Rweevil_c24555/f1p5/2795,i2_HQ_Rweevil_c73812/f71p8/2921,i6_LQ_Rweevil_c1261/f1p0/6409,i2_HQ_Rweevil_c148481/f56p0/2908,i2_LQ_Rweevil_c87523/f1p5/2582,i2_HQ_Rweevil_c60499/f2p18/3879,i3_LQ_Rweevil_c15089/f1p1/3036,i1_LQ_Rweevil_c34927/f1p56/1047,i1_HQ_Rweevil_c121140/f49p0/1116,i2_LQ_Rweevil_c108641/f1p22/2954,i1_HQ_Rweevil_c96480/f7p0/1646
GO:0030170	pyridoxal phosphate binding	molecular_function	0.024066	0.48724	21	3203	116	27707	14	i5_HQ_Rweevil_c430/f2p0/5534,i1_LQ_Rweevil_c7178/f1p0/1759,i1_LQ_Rweevil_c50912/f1p0/1656,i4_LQ_Rweevil_c5401/f1p17/4233,i1_HQ_Rweevil_c1216/f13p0/1908,i2_LQ_Rweevil_c106705/f1p2/2917,i3_LQ_Rweevil_c24999/f1p9/3279,i0_LQ_Rweevil_c32336/f1p0/818,i1_LQ_Rweevil_c4097/f1p3/1509,i1_HQ_Rweevil_c11683/f4p0/1270,i2_LQ_Rweevil_c109928/f1p6/2715,i2_LQ_Rweevil_c42687/f1p4/2518,i2_HQ_Rweevil_c147880/f19p2/25…	7	i1_LQ_Rweevil_c71698/f1p0/1933,i2_LQ_Rweevil_c5147/f1p8/2254,i2_LQ_Rweevil_c64995/f1p5/2628,i3_HQ_Rweevil_c17239/f4p0/3170,i1_LQ_Rweevil_c12364/f1p5/1703,i2_LQ_Rweevil_c133578/f1p2/2390,i1_HQ_Rweevil_c39806/f8p0/1666
GO:0005044	scavenger receptor activity	molecular_function	0.024822	0.49634	5	3203	15	27707	1	i1_LQ_Rweevil_c3611/f1p1/1639	4	i4_LQ_Rweevil_c7404/f1p0/4653,i2_HQ_Rweevil_c99634/f29p3/2185,i1_LQ_Rweevil_c22321/f1p0/1923,i1_HQ_Rweevil_c8704/f2p11/1812
GO:0038024	cargo receptor activity	molecular_function	0.024822	0.49634	5	3203	15	27707	1	i1_LQ_Rweevil_c3611/f1p1/1639	4	i1_HQ_Rweevil_c8704/f2p11/1812,i1_LQ_Rweevil_c22321/f1p0/1923,i2_HQ_Rweevil_c99634/f29p3/2185,i4_LQ_Rweevil_c7404/f1p0/4653
GO:0019773	proteasome core complex, alpha-subunit complex	cellular_component	0.02487	0.49634	5	3203	16	27707	0		5	i0_HQ_Rweevil_c663/f8p0/839,i1_HQ_Rweevil_c83590/f11p3/1118,i0_HQ_Rweevil_c162/f18p0/926,i0_HQ_Rweevil_c918/f9p0/941,i1_HQ_Rweevil_c109553/f4p0/1083
GO:0006979	response to oxidative stress	biological_process	0.025511	0.50671	14	3203	70	27707	9	i2_LQ_Rweevil_c109811/f1p22/2985,i5_LQ_Rweevil_c4622/f1p0/5571,i3_HQ_Rweevil_c40635/f18p0/3497,i2_LQ_Rweevil_c98680/f1p11/2728,i1_LQ_Rweevil_c30819/f1p9/1646,i7_LQ_Rweevil_c551/f1p0/7327,i3_LQ_Rweevil_c24154/f1p0/3513,i3_LQ_Rweevil_c28121/f1p0/3628,i6_LQ_Rweevil_c1852/f1p0/6241	5	i2_HQ_Rweevil_c11456/f3p9/2901,i2_LQ_Rweevil_c80810/f1p39/2718,i2_HQ_Rweevil_c12174/f3p38/2661,i0_LQ_Rweevil_c14258/f1p0/759,i2_LQ_Rweevil_c109220/f1p20/2862
GO:0009123	nucleoside monophosphate metabolic process	biological_process	0.025826	0.51055	43	3203	279	27707	31	i0_LQ_Rweevil_c37758/f1p0/987,i4_HQ_Rweevil_c1158/f4p0/4431,i0_LQ_Rweevil_c91019/f2p0/884,i0_LQ_Rweevil_c26298/f1p0/337,i2_LQ_Rweevil_c36370/f1p27/2340,i1_LQ_Rweevil_c23034/f1p5/1677,i0_LQ_Rweevil_c23175/f1p7/817,i0_LQ_Rweevil_c33680/f1p0/515,i2_LQ_Rweevil_c14630/f1p6/2131,i1_LQ_Rweevil_c34353/f1p0/1023,i2_LQ_Rweevil_c82705/f1p23/2501,i5_HQ_Rweevil_c557/f2p0/5530,i0_LQ_Rweevil_c32571/f1p0/845,i2_…	12	i1_HQ_Rweevil_c96480/f7p0/1646,i1_LQ_Rweevil_c34927/f1p56/1047,i3_LQ_Rweevil_c15089/f1p1/3036,i2_LQ_Rweevil_c87523/f1p5/2582,i2_HQ_Rweevil_c60499/f2p18/3879,i2_LQ_Rweevil_c108641/f1p22/2954,i1_HQ_Rweevil_c121140/f49p0/1116,i2_HQ_Rweevil_c73812/f71p8/2921,i6_LQ_Rweevil_c1261/f1p0/6409,i2_HQ_Rweevil_c148481/f56p0/2908,i2_LQ_Rweevil_c24555/f1p5/2795,i2_LQ_Rweevil_c85130/f1p0/2686
GO:0005096	GTPase activator activity	molecular_function	0.026844	0.52818	18	3203	96	27707	4	i1_LQ_Rweevil_c46000/f1p0/2003,i2_LQ_Rweevil_c108705/f1p2/2381,i2_LQ_Rweevil_c61004/f1p7/2613,i4_LQ_Rweevil_c2959/f1p3/4234	14	i4_HQ_Rweevil_c1421/f3p0/4115,i1_LQ_Rweevil_c146834/f1p0/1017,i4_LQ_Rweevil_c12942/f1p4/4120,i2_LQ_Rweevil_c39105/f1p4/2059,i2_LQ_Rweevil_c84779/f1p14/2891,i2_LQ_Rweevil_c49935/f1p21/2122,i0_LQ_Rweevil_c47751/f3p0/849,i1_LQ_Rweevil_c43311/f1p0/1185,i0_LQ_Rweevil_c23030/f1p401/816,i0_LQ_Rweevil_c7383/f1p0/827,i4_LQ_Rweevil_c8653/f1p0/4134,i1_LQ_Rweevil_c41478/f1p2/1226,i2_LQ_Rweevil_c111421/f1p10/…
GO:0015934	large ribosomal subunit	cellular_component	0.026972	0.52823	6	3203	21	27707	6	i4_LQ_Rweevil_c2340/f1p1/4658,i1_HQ_Rweevil_c4583/f2p0/1983,i2_LQ_Rweevil_c63101/f1p6/2132,i3_LQ_Rweevil_c35598/f1p0/3203,i3_LQ_Rweevil_c35304/f1p0/3843,i2_LQ_Rweevil_c84552/f1p1/2275	0
GO:0048037	cofactor binding	molecular_function	0.027143	0.52911	104	3203	751	27707	67	i2_LQ_Rweevil_c44642/f1p1/2721,i1_HQ_Rweevil_c11683/f4p0/1270,i2_LQ_Rweevil_c106705/f1p2/2917,i1_HQ_Rweevil_c25511/f2p0/1299,i2_HQ_Rweevil_c127409/f23p5/2284,i4_LQ_Rweevil_c5401/f1p17/4233,i1_LQ_Rweevil_c5098/f1p0/1686,i1_LQ_Rweevil_c50912/f1p0/1656,i2_LQ_Rweevil_c87944/f1p8/3042,i2_HQ_Rweevil_c64353/f2p3/2352,i2_LQ_Rweevil_c25850/f1p4/2538,i3_LQ_Rweevil_c11756/f1p0/3212,i1_LQ_Rweevil_c8941/f1p85…	37	i3_LQ_Rweevil_c7589/f1p21/3380,i1_LQ_Rweevil_c7756/f1p0/1680,i2_LQ_Rweevil_c86242/f1p75/2276,i1_LQ_Rweevil_c5140/f4p8/1500,i2_LQ_Rweevil_c108717/f1p1/2292,i2_LQ_Rweevil_c20738/f1p5/2132,i2_HQ_Rweevil_c17012/f15p1/2253,i4_HQ_Rweevil_c930/f5p0/4791,i3_HQ_Rweevil_c2300/f2p10/3655,i3_LQ_Rweevil_c25589/f1p0/3141,i2_LQ_Rweevil_c5147/f1p8/2254,i2_HQ_Rweevil_c51365/f18p5/2243,i1_LQ_Rweevil_c77730/f1p11/1…
GO:0019693	ribose phosphate metabolic process	biological_process	0.028185	0.54687	50	3203	334	27707	33	i0_LQ_Rweevil_c32571/f1p0/845,i2_LQ_Rweevil_c58898/f1p0/2662,i2_HQ_Rweevil_c78235/f2p2/2278,i5_LQ_Rweevil_c3832/f1p6/5509,i1_LQ_Rweevil_c5955/f1p0/1950,i2_LQ_Rweevil_c29924/f1p3/2108,i2_LQ_Rweevil_c153769/f1p8/2884,i1_LQ_Rweevil_c29610/f1p4/1799,i0_LQ_Rweevil_c58216/f1p0/679,i4_LQ_Rweevil_c7765/f1p0/4625,i2_LQ_Rweevil_c8751/f1p23/3093,i2_LQ_Rweevil_c39475/f1p2/2722,i2_LQ_Rweevil_c25688/f1p13/2199…	17	i6_LQ_Rweevil_c1261/f1p0/6409,i2_HQ_Rweevil_c73812/f71p8/2921,i2_HQ_Rweevil_c148481/f56p0/2908,i1_HQ_Rweevil_c52526/f2p0/1825,i3_LQ_Rweevil_c7589/f1p21/3380,i2_LQ_Rweevil_c24555/f1p5/2795,i2_LQ_Rweevil_c85130/f1p0/2686,i2_LQ_Rweevil_c71487/f1p3/2094,i1_HQ_Rweevil_c96480/f7p0/1646,i2_LQ_Rweevil_c115091/f1p20/2356,i1_LQ_Rweevil_c34927/f1p56/1047,i3_LQ_Rweevil_c15089/f1p1/3036,i2_LQ_Rweevil_c104991/…
GO:0051015	actin filament binding	molecular_function	0.028614	0.55262	6	3203	21	27707	2	i2_LQ_Rweevil_c58365/f1p10/1997,i9_LQ_Rweevil_c65/f1p0/9271	4	i3_HQ_Rweevil_c40313/f44p0/3467,i3_LQ_Rweevil_c12706/f1p0/3088,i4_HQ_Rweevil_c877/f7p0/4503,i4_HQ_Rweevil_c1117/f4p0/4280
GO:0004871	signal transducer activity	molecular_function	0.028882	0.55516	95	3203	678	27707	39	i3_LQ_Rweevil_c18168/f1p4/3895,i2_LQ_Rweevil_c44631/f1p79/2754,i1_HQ_Rweevil_c4182/f3p3/1617,i2_LQ_Rweevil_c135784/f1p3/2232,i2_LQ_Rweevil_c11036/f1p4/2645,i3_LQ_Rweevil_c21450/f1p1/3357,i3_LQ_Rweevil_c19469/f1p31/3545,i3_LQ_Rweevil_c6355/f1p0/3354,i4_LQ_Rweevil_c7828/f1p0/4820,i4_LQ_Rweevil_c5875/f1p0/4765,i2_LQ_Rweevil_c8029/f1p66/2558,i2_LQ_Rweevil_c5289/f1p3/2973,i3_LQ_Rweevil_c14536/f1p3/305…	56	i2_LQ_Rweevil_c45020/f1p3/2475,i2_LQ_Rweevil_c106904/f1p31/3031,i2_LQ_Rweevil_c142283/f1p2/2090,i2_LQ_Rweevil_c20554/f1p8/2855,i1_LQ_Rweevil_c54088/f1p0/1925,i2_LQ_Rweevil_c104712/f1p2/2989,i2_LQ_Rweevil_c12823/f1p6/2862,i4_LQ_Rweevil_c5458/f1p0/4730,i1_LQ_Rweevil_c68499/f1p0/1678,i3_HQ_Rweevil_c30208/f2p0/3487,i8_LQ_Rweevil_c516/f1p0/8024,i1_HQ_Rweevil_c63943/f23p8/1672,i4_LQ_Rweevil_c6993/f1p18…
GO:0009251	glucan catabolic process	biological_process	0.029621	0.55516	5	3203	16	27707	0		5	i2_LQ_Rweevil_c110094/f1p13/2480,i2_LQ_Rweevil_c29757/f1p13/2068,i2_LQ_Rweevil_c69977/f1p13/2074,i2_LQ_Rweevil_c49875/f1p14/2095,i2_HQ_Rweevil_c47113/f2p13/2048
GO:0030245	cellulose catabolic process	biological_process	0.029621	0.55516	5	3203	16	27707	0		5	i2_HQ_Rweevil_c47113/f2p13/2048,i2_LQ_Rweevil_c49875/f1p14/2095,i2_LQ_Rweevil_c69977/f1p13/2074,i2_LQ_Rweevil_c29757/f1p13/2068,i2_LQ_Rweevil_c110094/f1p13/2480
GO:0044247	cellular polysaccharide catabolic process	biological_process	0.029621	0.55516	5	3203	16	27707	0		5	i2_HQ_Rweevil_c47113/f2p13/2048,i2_LQ_Rweevil_c69977/f1p13/2074,i2_LQ_Rweevil_c29757/f1p13/2068,i2_LQ_Rweevil_c110094/f1p13/2480,i2_LQ_Rweevil_c49875/f1p14/2095
GO:0051275	beta-glucan catabolic process	biological_process	0.029621	0.55516	5	3203	16	27707	0		5	i2_HQ_Rweevil_c47113/f2p13/2048,i2_LQ_Rweevil_c49875/f1p14/2095,i2_LQ_Rweevil_c29757/f1p13/2068,i2_LQ_Rweevil_c69977/f1p13/2074,i2_LQ_Rweevil_c110094/f1p13/2480
GO:0006120	mitochondrial electron transport, NADH to ubiquinone	biological_process	0.029665	0.55516	4	3203	11	27707	4	i4_HQ_Rweevil_c1158/f4p0/4431,i5_LQ_Rweevil_c3832/f1p6/5509,i4_LQ_Rweevil_c7765/f1p0/4625,i5_HQ_Rweevil_c557/f2p0/5530	0
GO:0060590	ATPase regulator activity	molecular_function	0.029672	0.55516	10	3203	45	27707	2	i1_LQ_Rweevil_c14992/f1p10/1123,i0_LQ_Rweevil_c52297/f1p0/776	8	i7_LQ_Rweevil_c1023/f1p0/7115,i2_LQ_Rweevil_c79018/f1p1/2158,i3_HQ_Rweevil_c2371/f3p4/3348,i2_LQ_Rweevil_c115091/f1p20/2356,i1_LQ_Rweevil_c81808/f1p31/1629,i2_LQ_Rweevil_c43754/f1p0/2994,i3_LQ_Rweevil_c26468/f1p12/3522,i3_LQ_Rweevil_c28594/f1p0/3183
GO:0006023	aminoglycan biosynthetic process	biological_process	0.030999	0.57443	7	3203	27	27707	1	i3_LQ_Rweevil_c5876/f1p0/3592	6	i3_LQ_Rweevil_c10644/f1p3/3279,i4_LQ_Rweevil_c5628/f1p0/4227,i4_LQ_Rweevil_c10606/f1p6/4589,i3_HQ_Rweevil_c1347/f10p0/3386,i2_LQ_Rweevil_c18578/f1p0/2624,i2_LQ_Rweevil_c62523/f1p0/2659
GO:0006024	glycosaminoglycan biosynthetic process	biological_process	0.030999	0.57443	7	3203	27	27707	1	i3_LQ_Rweevil_c5876/f1p0/3592	6	i3_LQ_Rweevil_c10644/f1p3/3279,i2_LQ_Rweevil_c18578/f1p0/2624,i2_LQ_Rweevil_c62523/f1p0/2659,i4_LQ_Rweevil_c5628/f1p0/4227,i3_HQ_Rweevil_c1347/f10p0/3386,i4_LQ_Rweevil_c10606/f1p6/4589
GO:0006072	glycerol-3-phosphate metabolic process	biological_process	0.03125	0.57443	8	3203	33	27707	8	i1_HQ_Rweevil_c120705/f5p0/1946,i3_HQ_Rweevil_c17540/f4p20/3813,i3_HQ_Rweevil_c4085/f2p0/3271,i4_LQ_Rweevil_c10031/f1p0/4585,i1_HQ_Rweevil_c20209/f2p0/1783,i1_HQ_Rweevil_c141117/f3p0/1678,i2_LQ_Rweevil_c164541/f1p10/2003,i1_LQ_Rweevil_c65508/f1p0/1426	0
GO:0046168	glycerol-3-phosphate catabolic process	biological_process	0.03125	0.57443	8	3203	33	27707	8	i2_LQ_Rweevil_c164541/f1p10/2003,i1_LQ_Rweevil_c65508/f1p0/1426,i1_HQ_Rweevil_c141117/f3p0/1678,i4_LQ_Rweevil_c10031/f1p0/4585,i1_HQ_Rweevil_c20209/f2p0/1783,i3_HQ_Rweevil_c17540/f4p20/3813,i3_HQ_Rweevil_c4085/f2p0/3271,i1_HQ_Rweevil_c120705/f5p0/1946	0
GO:0006537	glutamate biosynthetic process	biological_process	0.031868	0.57946	4	3203	11	27707	3	i7_LQ_Rweevil_c163/f1p0/7822,i3_LQ_Rweevil_c43458/f1p0/3034,i4_LQ_Rweevil_c10298/f1p0/4710	1	i2_HQ_Rweevil_c73820/f17p1/2269
GO:0043650	dicarboxylic acid biosynthetic process	biological_process	0.031868	0.57946	4	3203	11	27707	3	i3_LQ_Rweevil_c43458/f1p0/3034,i4_LQ_Rweevil_c10298/f1p0/4710,i7_LQ_Rweevil_c163/f1p0/7822	1	i2_HQ_Rweevil_c73820/f17p1/2269
GO:0032501	multicellular organismal process	biological_process	0.032044	0.57946	80	3203	565	27707	41	i1_LQ_Rweevil_c12419/f1p1/1724,i2_LQ_Rweevil_c19251/f1p2/2262,i1_LQ_Rweevil_c6852/f1p0/1890,i1_HQ_Rweevil_c35180/f2p0/1511,i2_HQ_Rweevil_c147351/f6p10/2079,i0_LQ_Rweevil_c52297/f1p0/776,i2_LQ_Rweevil_c135861/f1p90/2653,i3_HQ_Rweevil_c5275/f6p0/3254,i2_LQ_Rweevil_c135408/f1p7/2494,i1_LQ_Rweevil_c30154/f1p0/1691,i1_LQ_Rweevil_c67077/f1p0/1989,i2_LQ_Rweevil_c37529/f1p10/2370,i2_LQ_Rweevil_c30135/f1p…	39	i5_LQ_Rweevil_c2643/f1p2/5174,i2_LQ_Rweevil_c115091/f1p20/2356,i1_LQ_Rweevil_c45192/f1p0/1917,i2_HQ_Rweevil_c1904/f10p3/2685,i2_LQ_Rweevil_c95933/f1p3/2119,i2_LQ_Rweevil_c49592/f1p0/2033,i0_LQ_Rweevil_c22873/f1p0/943,i2_LQ_Rweevil_c10452/f1p19/2684,i9_HQ_Rweevil_c4/f2p0/9144,i2_LQ_Rweevil_c3153/f1p20/2545,i1_LQ_Rweevil_c42845/f1p0/1173,i3_LQ_Rweevil_c9661/f1p0/3273,i2_LQ_Rweevil_c86551/f1p1/2872,…
GO:0016477	cell migration	biological_process	0.032215	0.57946	9	3203	39	27707	5	i1_LQ_Rweevil_c12972/f1p60/1762,i1_LQ_Rweevil_c10445/f1p0/1939,i1_LQ_Rweevil_c67077/f1p0/1989,i1_LQ_Rweevil_c50155/f1p1/1754,i2_LQ_Rweevil_c55224/f1p4/2604	4	i2_LQ_Rweevil_c58118/f1p0/2812,i3_LQ_Rweevil_c19966/f1p0/3112,i11_LQ_Rweevil_c12/f1p0/11139,i7_LQ_Rweevil_c114/f1p0/7273
GO:0030334	regulation of cell migration	biological_process	0.032215	0.57946	9	3203	39	27707	5	i1_LQ_Rweevil_c10445/f1p0/1939,i1_LQ_Rweevil_c67077/f1p0/1989,i1_LQ_Rweevil_c12972/f1p60/1762,i2_LQ_Rweevil_c55224/f1p4/2604,i1_LQ_Rweevil_c50155/f1p1/1754	4	i2_LQ_Rweevil_c58118/f1p0/2812,i7_LQ_Rweevil_c114/f1p0/7273,i11_LQ_Rweevil_c12/f1p0/11139,i3_LQ_Rweevil_c19966/f1p0/3112
GO:0048040	UDP-glucuronate decarboxylase activity	molecular_function	0.032688	0.58532	4	3203	11	27707	4	i6_LQ_Rweevil_c1792/f1p0/6564,i5_LQ_Rweevil_c453/f2p0/5419,i5_LQ_Rweevil_c3146/f1p0/5388,i5_LQ_Rweevil_c1961/f1p0/5467	0
GO:0070588	calcium ion transmembrane transport	biological_process	0.03282	0.58532	7	3203	27	27707	6	i1_LQ_Rweevil_c8453/f1p2/1955,i6_LQ_Rweevil_c392/f1p0/6215,i6_LQ_Rweevil_c1820/f1p2/6291,i1_LQ_Rweevil_c8309/f1p0/1805,i4_LQ_Rweevil_c4591/f1p0/4277,i5_LQ_Rweevil_c3209/f1p0/5482	1	i2_HQ_Rweevil_c51491/f15p5/2116
GO:1902600	hydrogen ion transmembrane transport	biological_process	0.032987	0.5858	58	3203	398	27707	37	i4_LQ_Rweevil_c7548/f1p0/4229,i6_LQ_Rweevil_c825/f1p16/6429,i4_LQ_Rweevil_c13238/f1p0/4044,i3_HQ_Rweevil_c19173/f2p0/3599,i4_HQ_Rweevil_c1333/f3p0/4503,i1_LQ_Rweevil_c80080/f1p0/1860,i0_LQ_Rweevil_c30759/f1p0/656,i2_LQ_Rweevil_c55224/f1p4/2604,i2_HQ_Rweevil_c50762/f23p5/2889,i3_LQ_Rweevil_c23430/f1p4/3618,i0_LQ_Rweevil_c72444/f1p0/790,i2_LQ_Rweevil_c8751/f1p23/3093,i2_LQ_Rweevil_c23530/f1p2/2987,…	21	i2_LQ_Rweevil_c38367/f1p5/2852,i1_LQ_Rweevil_c73447/f1p5/1598,i2_HQ_Rweevil_c148481/f56p0/2908,i2_LQ_Rweevil_c77177/f1p2/3010,i3_LQ_Rweevil_c12587/f1p0/3810,i2_HQ_Rweevil_c73812/f71p8/2921,i6_LQ_Rweevil_c1261/f1p0/6409,i2_LQ_Rweevil_c88626/f1p2/2735,i1_HQ_Rweevil_c121140/f49p0/1116,i2_LQ_Rweevil_c108641/f1p22/2954,i4_LQ_Rweevil_c9767/f1p0/4699,i1_LQ_Rweevil_c120821/f1p3/1109,i1_LQ_Rweevil_c34927/…
GO:0016884	carbon-nitrogen ligase activity, with glutamine as amido-N-donor	molecular_function	0.033613	0.59132	8	3203	33	27707	8	i5_HQ_Rweevil_c241/f5p0/5603,i5_LQ_Rweevil_c5084/f1p4/5096,i8_LQ_Rweevil_c244/f1p0/8473,i9_LQ_Rweevil_c52/f1p0/9361,i2_LQ_Rweevil_c14630/f1p6/2131,i4_HQ_Rweevil_c1587/f2p0/4333,i5_LQ_Rweevil_c2635/f1p4/5656,i8_LQ_Rweevil_c102/f1p0/8951	0
GO:0008137	NADH dehydrogenase (ubiquinone) activity	molecular_function	0.033721	0.59132	10	3203	48	27707	8	i0_LQ_Rweevil_c7065/f1p27/837,i0_LQ_Rweevil_c33680/f1p0/515,i0_HQ_Rweevil_c63451/f2p0/224,i0_LQ_Rweevil_c51893/f1p0/377,i0_HQ_Rweevil_c721/f11p0/526,i4_LQ_Rweevil_c7765/f1p0/4625,i0_HQ_Rweevil_c47333/f11p9/489,i1_LQ_Rweevil_c145427/f1p0/1018	2	i3_LQ_Rweevil_c26517/f1p0/3811,i4_LQ_Rweevil_c3352/f1p0/4367
GO:0050136	NADH dehydrogenase (quinone) activity	molecular_function	0.033721	0.59132	10	3203	48	27707	8	i0_LQ_Rweevil_c7065/f1p27/837,i0_LQ_Rweevil_c33680/f1p0/515,i0_HQ_Rweevil_c63451/f2p0/224,i0_LQ_Rweevil_c51893/f1p0/377,i4_LQ_Rweevil_c7765/f1p0/4625,i0_HQ_Rweevil_c721/f11p0/526,i1_LQ_Rweevil_c145427/f1p0/1018,i0_HQ_Rweevil_c47333/f11p9/489	2	i3_LQ_Rweevil_c26517/f1p0/3811,i4_LQ_Rweevil_c3352/f1p0/4367
GO:0051082	unfolded protein binding	molecular_function	0.033935	0.59259	34	3203	214	27707	6	i7_LQ_Rweevil_c228/f1p0/7364,i7_LQ_Rweevil_c645/f1p0/7459,i5_LQ_Rweevil_c4943/f1p4/5107,i8_LQ_Rweevil_c270/f1p0/8923,i4_LQ_Rweevil_c10172/f1p0/4346,i2_LQ_Rweevil_c55224/f1p4/2604	28	i2_LQ_Rweevil_c22287/f1p4/2889,i2_LQ_Rweevil_c115091/f1p20/2356,i2_HQ_Rweevil_c28026/f7p7/2680,i2_LQ_Rweevil_c62366/f1p0/2241,i1_LQ_Rweevil_c2831/f1p9/1646,i2_LQ_Rweevil_c85150/f1p6/2680,i4_LQ_Rweevil_c3647/f1p11/4174,i1_HQ_Rweevil_c96747/f5p0/1770,i2_LQ_Rweevil_c18275/f1p3/2635,i3_LQ_Rweevil_c37002/f1p1/3256,i3_LQ_Rweevil_c12550/f1p0/3503,i4_HQ_Rweevil_c12387/f2p6/4055,i2_LQ_Rweevil_c44678/f1p2/…
GO:0004602	glutathione peroxidase activity	molecular_function	0.034263	0.59584	4	3203	12	27707	0		4	i2_HQ_Rweevil_c12174/f3p38/2661,i2_HQ_Rweevil_c11456/f3p9/2901,i0_LQ_Rweevil_c14258/f1p0/759,i2_LQ_Rweevil_c80810/f1p39/2718
GO:0016469	proton-transporting two-sector ATPase complex	cellular_component	0.034524	0.5979	54	3203	368	27707	33	i0_LQ_Rweevil_c72444/f1p0/790,i2_LQ_Rweevil_c55224/f1p4/2604,i2_HQ_Rweevil_c50762/f23p5/2889,i3_LQ_Rweevil_c23430/f1p4/3618,i0_LQ_Rweevil_c30759/f1p0/656,i4_HQ_Rweevil_c1333/f3p0/4503,i3_HQ_Rweevil_c19173/f2p0/3599,i4_LQ_Rweevil_c13238/f1p0/4044,i6_LQ_Rweevil_c825/f1p16/6429,i4_LQ_Rweevil_c7548/f1p0/4229,i2_LQ_Rweevil_c23530/f1p2/2987,i2_LQ_Rweevil_c8751/f1p23/3093,i1_LQ_Rweevil_c29610/f1p4/1799,…	21	i2_LQ_Rweevil_c38367/f1p5/2852,i1_LQ_Rweevil_c73447/f1p5/1598,i3_LQ_Rweevil_c12587/f1p0/3810,i2_LQ_Rweevil_c77177/f1p2/3010,i2_HQ_Rweevil_c148481/f56p0/2908,i2_LQ_Rweevil_c88626/f1p2/2735,i6_LQ_Rweevil_c1261/f1p0/6409,i2_HQ_Rweevil_c73812/f71p8/2921,i2_LQ_Rweevil_c108641/f1p22/2954,i1_HQ_Rweevil_c121140/f49p0/1116,i3_LQ_Rweevil_c15089/f1p1/3036,i2_HQ_Rweevil_c60499/f2p18/3879,i2_LQ_Rweevil_c87523…
GO:0004061	arylformamidase activity	molecular_function	0.034714	0.59871	2	3203	3	27707	0		2	i0_LQ_Rweevil_c60066/f1p0/893,i2_LQ_Rweevil_c22765/f1p28/2229
GO:0008152	metabolic process	biological_process	0.035077	0.6025	1465	3203	12270	27707	748	i4_LQ_Rweevil_c4192/f1p0/4642,i3_LQ_Rweevil_c26064/f1p4/3949,i11_LQ_Rweevil_c69/f1p0/11769,i2_HQ_Rweevil_c53965/f6p1/2294,i2_LQ_Rweevil_c85075/f1p85/3024,i2_LQ_Rweevil_c41214/f1p3/2616,i1_LQ_Rweevil_c29610/f1p4/1799,i4_LQ_Rweevil_c8892/f1p11/4356,i2_HQ_Rweevil_c21080/f2p0/2791,i2_LQ_Rweevil_c10000/f1p2/2799,i3_LQ_Rweevil_c18069/f1p0/3571,i4_LQ_Rweevil_c9702/f1p0/4713,i0_HQ_Rweevil_c11487/f2p22/58…	717	i2_LQ_Rweevil_c106904/f1p31/3031,i1_LQ_Rweevil_c16108/f1p0/1088,i2_LQ_Rweevil_c98093/f1p3/1910,i2_LQ_Rweevil_c19512/f1p3/2852,i2_LQ_Rweevil_c85235/f1p3/2850,i4_HQ_Rweevil_c13841/f4p0/4096,i1_LQ_Rweevil_c26791/f1p17/1803,i1_LQ_Rweevil_c130452/f1p0/1091,i2_LQ_Rweevil_c23813/f1p14/2604,i2_LQ_Rweevil_c105288/f1p6/2475,i2_LQ_Rweevil_c23856/f1p0/2512,i7_LQ_Rweevil_c453/f1p0/7423,i2_HQ_Rweevil_c21513/f2…
GO:0006935	chemotaxis	biological_process	0.035521	0.60763	11	3203	53	27707	3	i4_LQ_Rweevil_c6428/f1p4/4685,i5_HQ_Rweevil_c558/f2p0/5401,i1_LQ_Rweevil_c4940/f1p0/1795	8	i2_HQ_Rweevil_c17355/f4p2/2789,i2_LQ_Rweevil_c6590/f1p2/2554,i2_HQ_Rweevil_c147752/f24p21/2935,i1_LQ_Rweevil_c28081/f1p0/1942,i2_HQ_Rweevil_c1571/f9p32/2954,i2_LQ_Rweevil_c54741/f1p0/2711,i4_LQ_Rweevil_c7155/f1p0/4814,i2_LQ_Rweevil_c106904/f1p31/3031
GO:0044003	modification by symbiont of host morphology or physiology	biological_process	0.036376	0.61722	11	3203	53	27707	5	i2_HQ_Rweevil_c60720/f3p2/2422,i1_LQ_Rweevil_c67077/f1p0/1989,i1_LQ_Rweevil_c50155/f1p1/1754,i3_HQ_Rweevil_c5040/f2p0/3247,i2_LQ_Rweevil_c55603/f1p2/2956	6	i2_HQ_Rweevil_c118314/f2p1/2060,i2_LQ_Rweevil_c57857/f1p4/2303,i2_LQ_Rweevil_c63268/f1p4/2227,i0_HQ_Rweevil_c881/f7p5/919,i3_LQ_Rweevil_c5174/f1p6/3852,i3_LQ_Rweevil_c5647/f1p0/3916
GO:0051817	modification of morphology or physiology of other organism involved in symbiotic interaction	biological_process	0.036376	0.61722	11	3203	53	27707	5	i1_LQ_Rweevil_c67077/f1p0/1989,i2_HQ_Rweevil_c60720/f3p2/2422,i2_LQ_Rweevil_c55603/f1p2/2956,i1_LQ_Rweevil_c50155/f1p1/1754,i3_HQ_Rweevil_c5040/f2p0/3247	6	i2_LQ_Rweevil_c63268/f1p4/2227,i2_HQ_Rweevil_c118314/f2p1/2060,i2_LQ_Rweevil_c57857/f1p4/2303,i3_LQ_Rweevil_c5647/f1p0/3916,i3_LQ_Rweevil_c5174/f1p6/3852,i0_HQ_Rweevil_c881/f7p5/919
GO:0030246	carbohydrate binding	molecular_function	0.036558	0.6178	18	3203	100	27707	8	i3_LQ_Rweevil_c36372/f1p0/3295,i3_LQ_Rweevil_c36805/f1p0/3246,i2_HQ_Rweevil_c22450/f2p3/2955,i2_LQ_Rweevil_c61717/f1p11/2209,i2_LQ_Rweevil_c55588/f1p3/2480,i2_LQ_Rweevil_c40814/f1p3/2270,i3_HQ_Rweevil_c39296/f2p1/3465,i3_HQ_Rweevil_c2046/f2p1/3370	10	i2_LQ_Rweevil_c79187/f1p5/2298,i4_LQ_Rweevil_c7404/f1p0/4653,i1_LQ_Rweevil_c22321/f1p0/1923,i2_LQ_Rweevil_c13317/f1p12/2671,i7_HQ_Rweevil_c1034/f3p0/7290,i1_HQ_Rweevil_c8704/f2p11/1812,i2_HQ_Rweevil_c99634/f29p3/2185,i1_HQ_Rweevil_c121294/f79p0/1629,i3_LQ_Rweevil_c30177/f1p0/3049,i5_LQ_Rweevil_c4127/f1p3/5542
GO:0006890	retrograde vesicle-mediated transport, Golgi to ER	biological_process	0.036925	0.61944	2	3203	3	27707	1	i5_LQ_Rweevil_c1423/f1p0/5417	1	i3_LQ_Rweevil_c9204/f1p0/3555
GO:0042803	protein homodimerization activity	molecular_function	0.036951	0.61944	32	3203	200	27707	15	i3_LQ_Rweevil_c6953/f1p0/3151,i0_LQ_Rweevil_c52297/f1p0/776,i3_LQ_Rweevil_c24250/f1p0/3313,i1_LQ_Rweevil_c50155/f1p1/1754,i3_LQ_Rweevil_c4988/f1p0/3263,i2_LQ_Rweevil_c155015/f1p6/2694,i4_LQ_Rweevil_c8154/f1p0/4809,i4_LQ_Rweevil_c4177/f1p1/4420,i2_LQ_Rweevil_c55224/f1p4/2604,i3_LQ_Rweevil_c8534/f1p5/3661,i1_LQ_Rweevil_c48518/f1p0/1916,i1_LQ_Rweevil_c14992/f1p10/1123,i4_HQ_Rweevil_c1899/f2p3/4252,i…	17	i5_LQ_Rweevil_c4662/f1p0/5091,i3_LQ_Rweevil_c28594/f1p0/3183,i2_LQ_Rweevil_c109206/f1p7/2679,i2_LQ_Rweevil_c115091/f1p20/2356,i3_LQ_Rweevil_c5647/f1p0/3916,i2_HQ_Rweevil_c2548/f5p6/2424,i3_LQ_Rweevil_c43158/f1p0/3009,i3_LQ_Rweevil_c26468/f1p12/3522,i2_HQ_Rweevil_c11146/f2p0/2776,i3_HQ_Rweevil_c31743/f11p0/3123,i2_LQ_Rweevil_c79018/f1p1/2158,i2_LQ_Rweevil_c43263/f2p0/2838,i1_LQ_Rweevil_c43311/f1p0…
GO:0003954	NADH dehydrogenase activity	molecular_function	0.037978	0.62613	10	3203	49	27707	8	i0_HQ_Rweevil_c47333/f11p9/489,i1_LQ_Rweevil_c145427/f1p0/1018,i0_LQ_Rweevil_c51893/f1p0/377,i0_HQ_Rweevil_c721/f11p0/526,i4_LQ_Rweevil_c7765/f1p0/4625,i0_HQ_Rweevil_c63451/f2p0/224,i0_LQ_Rweevil_c33680/f1p0/515,i0_LQ_Rweevil_c7065/f1p27/837	2	i4_LQ_Rweevil_c3352/f1p0/4367,i3_LQ_Rweevil_c26517/f1p0/3811
GO:0001907	killing by symbiont of host cells	biological_process	0.038097	0.62613	2	3203	3	27707	1	i2_HQ_Rweevil_c60720/f3p2/2422	1	i3_LQ_Rweevil_c5174/f1p6/3852
GO:0044004	disruption by symbiont of host cell	biological_process	0.038097	0.62613	2	3203	3	27707	1	i2_HQ_Rweevil_c60720/f3p2/2422	1	i3_LQ_Rweevil_c5174/f1p6/3852
GO:0051818	disruption of cells of other organism involved in symbiotic interaction	biological_process	0.038097	0.62613	2	3203	3	27707	1	i2_HQ_Rweevil_c60720/f3p2/2422	1	i3_LQ_Rweevil_c5174/f1p6/3852
GO:0051883	killing of cells in other organism involved in symbiotic interaction	biological_process	0.038097	0.62613	2	3203	3	27707	1	i2_HQ_Rweevil_c60720/f3p2/2422	1	i3_LQ_Rweevil_c5174/f1p6/3852
GO:0006739	NADP metabolic process	biological_process	0.039932	0.65372	6	3203	23	27707	5	i2_LQ_Rweevil_c131140/f1p3/2327,i2_LQ_Rweevil_c39475/f1p2/2722,i1_HQ_Rweevil_c1913/f4p0/1852,i2_LQ_Rweevil_c2998/f1p3/2300,i1_LQ_Rweevil_c89505/f1p0/1034	1	i1_HQ_Rweevil_c52526/f2p0/1825
GO:0016638	oxidoreductase activity, acting on the CH-NH2 group of donors	molecular_function	0.040541	0.66112	9	3203	41	27707	8	i1_LQ_Rweevil_c3611/f1p1/1639,i1_LQ_Rweevil_c44920/f1p0/1240,i4_LQ_Rweevil_c10298/f1p0/4710,i3_LQ_Rweevil_c43458/f1p0/3034,i3_LQ_Rweevil_c10260/f1p3/3245,i7_LQ_Rweevil_c163/f1p0/7822,i0_HQ_Rweevil_c12327/f4p0/876,i1_LQ_Rweevil_c54212/f1p4/1592	1	i2_HQ_Rweevil_c73820/f17p1/2269
GO:0002764	immune response-regulating signaling pathway	biological_process	0.040908	0.66452	4	3203	12	27707	3	i2_LQ_Rweevil_c24541/f1p3/2342,i1_LQ_Rweevil_c12972/f1p60/1762,i1_LQ_Rweevil_c10445/f1p0/1939	1	i3_LQ_Rweevil_c19966/f1p0/3112
GO:0033202	DNA helicase complex	cellular_component	0.042579	0.6846	6	3203	23	27707	0		6	i4_LQ_Rweevil_c8293/f1p0/4566,i2_HQ_Rweevil_c1820/f27p2/2639,i2_LQ_Rweevil_c38232/f1p1/2266,i3_LQ_Rweevil_c22338/f1p0/3758,i1_HQ_Rweevil_c1884/f8p13/1977,i2_LQ_Rweevil_c29591/f1p2/2046
GO:0019953	sexual reproduction	biological_process	0.042634	0.6846	11	3203	54	27707	6	i0_LQ_Rweevil_c57882/f1p0/563,i3_LQ_Rweevil_c20294/f1p0/3945,i5_LQ_Rweevil_c4055/f1p6/5925,i2_LQ_Rweevil_c135544/f1p43/2975,i1_LQ_Rweevil_c13623/f1p4/1589,i5_LQ_Rweevil_c1571/f1p32/5873	5	i3_LQ_Rweevil_c9661/f1p0/3273,i4_LQ_Rweevil_c3027/f1p0/4655,i3_LQ_Rweevil_c13532/f1p0/3124,i4_LQ_Rweevil_c9987/f1p0/4159,i5_LQ_Rweevil_c1020/f1p0/5164
GO:0044703	multi-organism reproductive process	biological_process	0.042634	0.6846	11	3203	54	27707	6	i5_LQ_Rweevil_c4055/f1p6/5925,i0_LQ_Rweevil_c57882/f1p0/563,i3_LQ_Rweevil_c20294/f1p0/3945,i1_LQ_Rweevil_c13623/f1p4/1589,i5_LQ_Rweevil_c1571/f1p32/5873,i2_LQ_Rweevil_c135544/f1p43/2975	5	i4_LQ_Rweevil_c3027/f1p0/4655,i3_LQ_Rweevil_c9661/f1p0/3273,i5_LQ_Rweevil_c1020/f1p0/5164,i3_LQ_Rweevil_c13532/f1p0/3124,i4_LQ_Rweevil_c9987/f1p0/4159
GO:0006536	glutamate metabolic process	biological_process	0.043358	0.69356	4	3203	12	27707	3	i7_LQ_Rweevil_c163/f1p0/7822,i4_LQ_Rweevil_c10298/f1p0/4710,i3_LQ_Rweevil_c43458/f1p0/3034	1	i2_HQ_Rweevil_c73820/f17p1/2269
GO:0009116	nucleoside metabolic process	biological_process	0.043929	0.69515	55	3203	383	27707	38	i2_LQ_Rweevil_c5234/f1p9/2244,i2_LQ_Rweevil_c25688/f1p13/2199,i2_LQ_Rweevil_c8751/f1p23/3093,i1_LQ_Rweevil_c6630/f1p0/1720,i3_LQ_Rweevil_c23430/f1p4/3618,i1_HQ_Rweevil_c28594/f3p0/1974,i0_LQ_Rweevil_c72444/f1p0/790,i2_LQ_Rweevil_c54553/f1p9/2408,i6_LQ_Rweevil_c825/f1p16/6429,i4_LQ_Rweevil_c7548/f1p0/4229,i4_LQ_Rweevil_c13238/f1p0/4044,i0_LQ_Rweevil_c30759/f1p0/656,i1_LQ_Rweevil_c80080/f1p0/1860,i…	17	i2_LQ_Rweevil_c85130/f1p0/2686,i2_LQ_Rweevil_c24555/f1p5/2795,i3_LQ_Rweevil_c7589/f1p21/3380,i2_LQ_Rweevil_c71487/f1p3/2094,i2_HQ_Rweevil_c73812/f71p8/2921,i6_LQ_Rweevil_c1261/f1p0/6409,i2_HQ_Rweevil_c148481/f56p0/2908,i1_LQ_Rweevil_c34167/f1p0/1086,i2_HQ_Rweevil_c60499/f2p18/3879,i2_LQ_Rweevil_c87523/f1p5/2582,i2_LQ_Rweevil_c104991/f1p4/2181,i3_LQ_Rweevil_c15089/f1p1/3036,i1_LQ_Rweevil_c34927/f1…
GO:1901657	glycosyl compound metabolic process	biological_process	0.043929	0.69515	55	3203	383	27707	38	i4_HQ_Rweevil_c1158/f4p0/4431,i0_LQ_Rweevil_c37758/f1p0/987,i0_LQ_Rweevil_c26298/f1p0/337,i0_LQ_Rweevil_c91019/f2p0/884,i2_LQ_Rweevil_c36370/f1p27/2340,i2_HQ_Rweevil_c1999/f7p5/2976,i1_LQ_Rweevil_c23034/f1p5/1677,i0_LQ_Rweevil_c23175/f1p7/817,i4_HQ_Rweevil_c1797/f2p0/4708,i0_LQ_Rweevil_c33680/f1p0/515,i1_LQ_Rweevil_c34353/f1p0/1023,i2_LQ_Rweevil_c14630/f1p6/2131,i2_LQ_Rweevil_c82705/f1p23/2501,i5…	17	i1_HQ_Rweevil_c96480/f7p0/1646,i1_LQ_Rweevil_c34927/f1p56/1047,i3_LQ_Rweevil_c15089/f1p1/3036,i2_LQ_Rweevil_c104991/f1p4/2181,i2_LQ_Rweevil_c87523/f1p5/2582,i2_HQ_Rweevil_c60499/f2p18/3879,i1_LQ_Rweevil_c34167/f1p0/1086,i2_LQ_Rweevil_c108641/f1p22/2954,i2_HQ_Rweevil_c126080/f3p0/2144,i1_HQ_Rweevil_c121140/f49p0/1116,i6_LQ_Rweevil_c1261/f1p0/6409,i2_HQ_Rweevil_c73812/f71p8/2921,i2_HQ_Rweevil_c1484…
GO:0015930	glutamate synthase activity	molecular_function	0.043955	0.69515	4	3203	12	27707	3	i3_LQ_Rweevil_c43458/f1p0/3034,i4_LQ_Rweevil_c10298/f1p0/4710,i7_LQ_Rweevil_c163/f1p0/7822	1	i2_HQ_Rweevil_c73820/f17p1/2269
GO:0042470	melanosome	cellular_component	0.045079	0.70759	6	3203	23	27707	2	i2_LQ_Rweevil_c7760/f1p3/2499,i1_LQ_Rweevil_c30929/f1p0/1850	4	i3_LQ_Rweevil_c22464/f1p56/3446,i3_LQ_Rweevil_c25274/f1p5/3943,i4_HQ_Rweevil_c630/f11p0/4888,i2_LQ_Rweevil_c108422/f1p0/2945
GO:0048770	pigment granule	cellular_component	0.045079	0.70759	6	3203	23	27707	2	i2_LQ_Rweevil_c7760/f1p3/2499,i1_LQ_Rweevil_c30929/f1p0/1850	4	i3_LQ_Rweevil_c25274/f1p5/3943,i3_LQ_Rweevil_c22464/f1p56/3446,i4_HQ_Rweevil_c630/f11p0/4888,i2_LQ_Rweevil_c108422/f1p0/2945
GO:0042330	taxis	biological_process	0.045373	0.70954	11	3203	55	27707	3	i4_LQ_Rweevil_c6428/f1p4/4685,i5_HQ_Rweevil_c558/f2p0/5401,i1_LQ_Rweevil_c4940/f1p0/1795	8	i2_HQ_Rweevil_c147752/f24p21/2935,i2_HQ_Rweevil_c17355/f4p2/2789,i2_LQ_Rweevil_c6590/f1p2/2554,i2_LQ_Rweevil_c106904/f1p31/3031,i2_LQ_Rweevil_c54741/f1p0/2711,i4_LQ_Rweevil_c7155/f1p0/4814,i1_LQ_Rweevil_c28081/f1p0/1942,i2_HQ_Rweevil_c1571/f9p32/2954
GO:0006570	tyrosine metabolic process	biological_process	0.047129	0.73427	5	3203	18	27707	5	i1_LQ_Rweevil_c6712/f1p0/1175,i4_LQ_Rweevil_c5997/f1p1/4781,i2_LQ_Rweevil_c25225/f1p8/2143,i3_LQ_Rweevil_c6668/f1p0/3161,i1_LQ_Rweevil_c11458/f1p0/1570	0
GO:0030243	cellulose metabolic process	biological_process	0.047819	0.74145	5	3203	18	27707	0		5	i2_HQ_Rweevil_c47113/f2p13/2048,i2_LQ_Rweevil_c49875/f1p14/2095,i2_LQ_Rweevil_c69977/f1p13/2074,i2_LQ_Rweevil_c29757/f1p13/2068,i2_LQ_Rweevil_c110094/f1p13/2480
GO:0098772	molecular function regulator	molecular_function	0.047944	0.74145	87	3203	630	27707	37	i2_LQ_Rweevil_c61004/f1p7/2613,i4_LQ_Rweevil_c2195/f1p1/4821,i4_LQ_Rweevil_c8892/f1p11/4356,i2_LQ_Rweevil_c108502/f1p2/2897,i2_LQ_Rweevil_c108705/f1p2/2381,i1_LQ_Rweevil_c46000/f1p0/2003,i4_HQ_Rweevil_c1584/f2p0/4697,i0_HQ_Rweevil_c11487/f2p22/580,i2_HQ_Rweevil_c36513/f4p1/2797,i2_LQ_Rweevil_c19793/f1p2/2470,i4_LQ_Rweevil_c2959/f1p3/4234,i6_LQ_Rweevil_c743/f1p0/6626,i1_LQ_Rweevil_c14992/f1p10/112…	50	i4_LQ_Rweevil_c9293/f1p0/4538,i3_HQ_Rweevil_c2371/f3p4/3348,i8_LQ_Rweevil_c219/f1p0/8426,i1_LQ_Rweevil_c15614/f1p0/1033,i2_LQ_Rweevil_c79018/f1p1/2158,i2_LQ_Rweevil_c111421/f1p10/2449,i1_LQ_Rweevil_c41478/f1p2/1226,i2_LQ_Rweevil_c41852/f1p3/3616,i4_LQ_Rweevil_c8653/f1p0/4134,i4_LQ_Rweevil_c10297/f1p3/4685,i0_LQ_Rweevil_c47751/f3p0/849,i8_LQ_Rweevil_c42/f1p0/8938,i7_LQ_Rweevil_c1023/f1p0/7115,i6_L…
GO:0008047	enzyme activator activity	molecular_function	0.04867	0.74991	21	3203	124	27707	6	i4_LQ_Rweevil_c2959/f1p3/4234,i2_HQ_Rweevil_c36513/f4p1/2797,i0_HQ_Rweevil_c11487/f2p22/580,i1_LQ_Rweevil_c46000/f1p0/2003,i2_LQ_Rweevil_c108705/f1p2/2381,i2_LQ_Rweevil_c61004/f1p7/2613	15	i1_LQ_Rweevil_c43311/f1p0/1185,i1_LQ_Rweevil_c81808/f1p31/1629,i0_LQ_Rweevil_c7383/f1p0/827,i4_LQ_Rweevil_c8653/f1p0/4134,i0_LQ_Rweevil_c23030/f1p401/816,i1_LQ_Rweevil_c41478/f1p2/1226,i2_LQ_Rweevil_c111421/f1p10/2449,i5_LQ_Rweevil_c3800/f1p0/5358,i4_HQ_Rweevil_c1421/f3p0/4115,i1_LQ_Rweevil_c146834/f1p0/1017,i2_LQ_Rweevil_c39105/f1p4/2059,i4_LQ_Rweevil_c12942/f1p4/4120,i2_LQ_Rweevil_c49935/f1p21/…
GO:0019054	modulation by virus of host process	biological_process	0.049042	0.75012	6	3203	24	27707	3	i1_LQ_Rweevil_c67077/f1p0/1989,i2_HQ_Rweevil_c60720/f3p2/2422,i1_LQ_Rweevil_c50155/f1p1/1754	3	i3_LQ_Rweevil_c5647/f1p0/3916,i2_LQ_Rweevil_c63268/f1p4/2227,i2_LQ_Rweevil_c57857/f1p4/2303
GO:0044068	modulation by symbiont of host cellular process	biological_process	0.049042	0.75012	6	3203	24	27707	3	i2_HQ_Rweevil_c60720/f3p2/2422,i1_LQ_Rweevil_c50155/f1p1/1754,i1_LQ_Rweevil_c67077/f1p0/1989	3	i2_LQ_Rweevil_c57857/f1p4/2303,i3_LQ_Rweevil_c5647/f1p0/3916,i2_LQ_Rweevil_c63268/f1p4/2227
GO:0019637	organophosphate metabolic process	biological_process	0.049486	0.75417	88	3203	646	27707	57	i0_LQ_Rweevil_c23175/f1p7/817,i1_HQ_Rweevil_c141117/f3p0/1678,i4_HQ_Rweevil_c1158/f4p0/4431,i0_LQ_Rweevil_c37758/f1p0/987,i2_LQ_Rweevil_c56369/f1p8/2079,i0_LQ_Rweevil_c91019/f2p0/884,i2_LQ_Rweevil_c36370/f1p27/2340,i1_HQ_Rweevil_c120705/f5p0/1946,i2_LQ_Rweevil_c82705/f1p23/2501,i5_HQ_Rweevil_c557/f2p0/5530,i4_LQ_Rweevil_c10031/f1p0/4585,i1_LQ_Rweevil_c89505/f1p0/1034,i2_LQ_Rweevil_c131140/f1p3/23…	31	i2_LQ_Rweevil_c115091/f1p20/2356,i1_HQ_Rweevil_c96480/f7p0/1646,i2_LQ_Rweevil_c108641/f1p22/2954,i1_HQ_Rweevil_c121140/f49p0/1116,i2_LQ_Rweevil_c65535/f1p0/2358,i1_LQ_Rweevil_c72411/f1p0/1531,i3_LQ_Rweevil_c15089/f1p1/3036,i2_LQ_Rweevil_c86017/f1p11/2419,i2_HQ_Rweevil_c60499/f2p18/3879,i2_LQ_Rweevil_c87523/f1p5/2582,i1_HQ_Rweevil_c13339/f3p12/1798,i1_HQ_Rweevil_c11550/f5p0/1522,i2_LQ_Rweevil_c714…
GO:0044707	single-multicellular organism process	biological_process	0.049817	0.75646	76	3203	546	27707	39	i2_LQ_Rweevil_c135408/f1p7/2494,i3_HQ_Rweevil_c5275/f6p0/3254,i2_LQ_Rweevil_c135861/f1p90/2653,i0_LQ_Rweevil_c52297/f1p0/776,i2_HQ_Rweevil_c147351/f6p10/2079,i1_HQ_Rweevil_c35180/f2p0/1511,i1_LQ_Rweevil_c6852/f1p0/1890,i2_LQ_Rweevil_c19251/f1p2/2262,i1_LQ_Rweevil_c12419/f1p1/1724,i1_LQ_Rweevil_c71593/f1p0/1725,i2_HQ_Rweevil_c5178/f3p2/2580,i2_LQ_Rweevil_c55224/f1p4/2604,i3_LQ_Rweevil_c12265/f1p37…	37	i2_LQ_Rweevil_c86551/f1p1/2872,i1_LQ_Rweevil_c42845/f1p0/1173,i2_LQ_Rweevil_c10452/f1p19/2684,i9_HQ_Rweevil_c4/f2p0/9144,i2_LQ_Rweevil_c3153/f1p20/2545,i2_LQ_Rweevil_c49592/f1p0/2033,i0_LQ_Rweevil_c22873/f1p0/943,i2_LQ_Rweevil_c95933/f1p3/2119,i2_HQ_Rweevil_c1904/f10p3/2685,i2_LQ_Rweevil_c115091/f1p20/2356,i1_LQ_Rweevil_c45192/f1p0/1917,i5_LQ_Rweevil_c2643/f1p2/5174,i3_LQ_Rweevil_c34705/f1p0/3181…
GO:0052646	alditol phosphate metabolic process	biological_process	0.050156	0.75886	8	3203	36	27707	8	i1_LQ_Rweevil_c65508/f1p0/1426,i2_LQ_Rweevil_c164541/f1p10/2003,i1_HQ_Rweevil_c141117/f3p0/1678,i4_LQ_Rweevil_c10031/f1p0/4585,i1_HQ_Rweevil_c20209/f2p0/1783,i3_HQ_Rweevil_c17540/f4p20/3813,i3_HQ_Rweevil_c4085/f2p0/3271,i1_HQ_Rweevil_c120705/f5p0/1946	0
GO:0071949	FAD binding	molecular_function	0.051075	0.76998	16	3203	89	27707	14	i1_HQ_Rweevil_c29789/f4p0/1677,i2_LQ_Rweevil_c110848/f1p6/2868,i2_LQ_Rweevil_c14600/f1p5/2069,i1_LQ_Rweevil_c50237/f1p0/1712,i11_LQ_Rweevil_c18/f1p0/11715,i2_LQ_Rweevil_c112919/f1p4/2752,i4_LQ_Rweevil_c11912/f1p0/4360,i2_LQ_Rweevil_c87944/f1p8/3042,i1_LQ_Rweevil_c5098/f1p0/1686,i1_HQ_Rweevil_c25511/f2p0/1299,i2_LQ_Rweevil_c44642/f1p1/2721,i1_LQ_Rweevil_c52948/f1p0/1812,i1_HQ_Rweevil_c9599/f3p1/16…	2	i2_LQ_Rweevil_c132564/f1p2/2835,i2_LQ_Rweevil_c20738/f1p5/2132
GO:0046434	organophosphate catabolic process	biological_process	0.051631	0.77558	10	3203	49	27707	9	i4_LQ_Rweevil_c10031/f1p0/4585,i1_HQ_Rweevil_c20209/f2p0/1783,i1_HQ_Rweevil_c141117/f3p0/1678,i2_LQ_Rweevil_c86368/f1p0/2191,i1_LQ_Rweevil_c65508/f1p0/1426,i2_LQ_Rweevil_c164541/f1p10/2003,i1_HQ_Rweevil_c120705/f5p0/1946,i3_HQ_Rweevil_c4085/f2p0/3271,i3_HQ_Rweevil_c17540/f4p20/3813	1	i2_LQ_Rweevil_c23856/f1p0/2512
GO:0007275	multicellular organismal development	biological_process	0.05312	0.78882	36	3203	237	27707	17	i4_LQ_Rweevil_c6428/f1p4/4685,i1_LQ_Rweevil_c50155/f1p1/1754,i5_LQ_Rweevil_c1531/f1p3/5630,i3_LQ_Rweevil_c27338/f1p0/3657,i1_LQ_Rweevil_c12419/f1p1/1724,i3_HQ_Rweevil_c5275/f6p0/3254,i1_HQ_Rweevil_c35180/f2p0/1511,i2_LQ_Rweevil_c84021/f1p2/2607,i2_HQ_Rweevil_c147351/f6p10/2079,i1_LQ_Rweevil_c67077/f1p0/1989,i1_LQ_Rweevil_c53159/f1p0/1654,i4_LQ_Rweevil_c2139/f1p0/4293,i1_LQ_Rweevil_c51779/f1p0/176…	19	i1_LQ_Rweevil_c45192/f1p0/1917,i2_LQ_Rweevil_c39657/f1p0/2134,i5_LQ_Rweevil_c2643/f1p2/5174,i4_LQ_Rweevil_c13321/f1p11/4042,i7_LQ_Rweevil_c114/f1p0/7273,i2_LQ_Rweevil_c86551/f1p1/2872,i9_HQ_Rweevil_c4/f2p0/9144,i2_LQ_Rweevil_c49592/f1p0/2033,i2_HQ_Rweevil_c34740/f2p1/2209,i4_LQ_Rweevil_c7155/f1p0/4814,i1_HQ_Rweevil_c2505/f7p0/1944,i4_LQ_Rweevil_c10140/f1p10/4317,i1_HQ_Rweevil_c1480/f4p0/1212,i2_L…
GO:0044702	single organism reproductive process	biological_process	0.053562	0.78882	11	3203	56	27707	6	i2_LQ_Rweevil_c135544/f1p43/2975,i5_LQ_Rweevil_c1571/f1p32/5873,i1_LQ_Rweevil_c13623/f1p4/1589,i3_LQ_Rweevil_c20294/f1p0/3945,i0_LQ_Rweevil_c57882/f1p0/563,i5_LQ_Rweevil_c4055/f1p6/5925	5	i3_LQ_Rweevil_c13532/f1p0/3124,i4_LQ_Rweevil_c9987/f1p0/4159,i5_LQ_Rweevil_c1020/f1p0/5164,i3_LQ_Rweevil_c9661/f1p0/3273,i4_LQ_Rweevil_c3027/f1p0/4655
GO:0009150	purine ribonucleotide metabolic process	biological_process	0.054147	0.78882	47	3203	325	27707	31	i1_LQ_Rweevil_c5955/f1p0/1950,i5_LQ_Rweevil_c3832/f1p6/5509,i2_LQ_Rweevil_c29924/f1p3/2108,i0_LQ_Rweevil_c32571/f1p0/845,i2_LQ_Rweevil_c58898/f1p0/2662,i2_HQ_Rweevil_c78235/f2p2/2278,i4_LQ_Rweevil_c7765/f1p0/4625,i0_LQ_Rweevil_c58216/f1p0/679,i2_LQ_Rweevil_c153769/f1p8/2884,i1_LQ_Rweevil_c29610/f1p4/1799,i2_LQ_Rweevil_c25688/f1p13/2199,i2_LQ_Rweevil_c8751/f1p23/3093,i3_LQ_Rweevil_c23430/f1p4/3618…	16	i2_HQ_Rweevil_c73812/f71p8/2921,i6_LQ_Rweevil_c1261/f1p0/6409,i2_HQ_Rweevil_c148481/f56p0/2908,i2_LQ_Rweevil_c24555/f1p5/2795,i2_LQ_Rweevil_c85130/f1p0/2686,i3_LQ_Rweevil_c7589/f1p21/3380,i2_LQ_Rweevil_c71487/f1p3/2094,i1_HQ_Rweevil_c96480/f7p0/1646,i2_LQ_Rweevil_c115091/f1p20/2356,i2_LQ_Rweevil_c104991/f1p4/2181,i3_LQ_Rweevil_c15089/f1p1/3036,i2_HQ_Rweevil_c60499/f2p18/3879,i2_LQ_Rweevil_c87523/…
GO:0009259	ribonucleotide metabolic process	biological_process	0.054147	0.78882	47	3203	325	27707	31	i2_LQ_Rweevil_c25688/f1p13/2199,i2_LQ_Rweevil_c8751/f1p23/3093,i3_LQ_Rweevil_c23430/f1p4/3618,i0_LQ_Rweevil_c72444/f1p0/790,i0_LQ_Rweevil_c30759/f1p0/656,i1_LQ_Rweevil_c80080/f1p0/1860,i4_LQ_Rweevil_c7548/f1p0/4229,i6_LQ_Rweevil_c825/f1p16/6429,i4_LQ_Rweevil_c13238/f1p0/4044,i5_LQ_Rweevil_c3832/f1p6/5509,i1_LQ_Rweevil_c5955/f1p0/1950,i2_LQ_Rweevil_c29924/f1p3/2108,i0_LQ_Rweevil_c32571/f1p0/845,i2…	16	i2_LQ_Rweevil_c24555/f1p5/2795,i2_LQ_Rweevil_c85130/f1p0/2686,i3_LQ_Rweevil_c7589/f1p21/3380,i2_LQ_Rweevil_c71487/f1p3/2094,i2_HQ_Rweevil_c73812/f71p8/2921,i6_LQ_Rweevil_c1261/f1p0/6409,i2_HQ_Rweevil_c148481/f56p0/2908,i2_LQ_Rweevil_c104991/f1p4/2181,i3_LQ_Rweevil_c15089/f1p1/3036,i2_HQ_Rweevil_c60499/f2p18/3879,i2_LQ_Rweevil_c87523/f1p5/2582,i1_LQ_Rweevil_c34927/f1p56/1047,i2_LQ_Rweevil_c108641/…
GO:0070011	peptidase activity, acting on L-amino acid peptides	molecular_function	0.054694	0.78882	161	3203	1238	27707	55	i2_LQ_Rweevil_c35932/f1p0/2493,i4_LQ_Rweevil_c14100/f1p4/4526,i2_LQ_Rweevil_c10446/f1p1/2544,i5_LQ_Rweevil_c1817/f1p2/5617,i2_LQ_Rweevil_c94128/f1p2/2098,i3_LQ_Rweevil_c26061/f1p0/3179,i2_LQ_Rweevil_c149921/f1p4/2491,i2_LQ_Rweevil_c35325/f1p0/2677,i3_LQ_Rweevil_c28634/f1p0/3315,i3_LQ_Rweevil_c36180/f1p117/3111,i3_LQ_Rweevil_c20544/f1p0/3254,i2_HQ_Rweevil_c10283/f4p0/2471,i2_LQ_Rweevil_c110118/f1p…	106	i3_LQ_Rweevil_c42027/f1p5/3089,i2_HQ_Rweevil_c31527/f2p5/2141,i1_LQ_Rweevil_c4550/f1p4/1686,i1_HQ_Rweevil_c84508/f5p0/1096,i2_HQ_Rweevil_c60499/f2p18/3879,i1_HQ_Rweevil_c12995/f2p3/1350,i1_LQ_Rweevil_c76283/f1p0/1738,i2_HQ_Rweevil_c28494/f29p1/2077,i3_HQ_Rweevil_c40793/f26p0/3200,i2_LQ_Rweevil_c110542/f1p1/2724,i4_LQ_Rweevil_c9973/f1p2/4325,i1_HQ_Rweevil_c12778/f2p5/1421,i1_HQ_Rweevil_c8294/f4p0/…
GO:0006606	protein import into nucleus	biological_process	0.054893	0.78882	29	3203	184	27707	15	i4_LQ_Rweevil_c4177/f1p1/4420,i1_LQ_Rweevil_c4272/f2p0/1985,i2_LQ_Rweevil_c55224/f1p4/2604,i6_LQ_Rweevil_c412/f1p7/6586,i2_LQ_Rweevil_c135408/f1p7/2494,i4_LQ_Rweevil_c6287/f1p2/4650,i3_LQ_Rweevil_c11141/f1p3/3205,i5_LQ_Rweevil_c1162/f1p0/5267,i5_LQ_Rweevil_c1281/f1p0/5711,i8_LQ_Rweevil_c270/f1p0/8923,i5_LQ_Rweevil_c1823/f1p0/5203,i1_LQ_Rweevil_c67077/f1p0/1989,i3_LQ_Rweevil_c24250/f1p0/3313,i1_LQ…	14	i1_LQ_Rweevil_c43311/f1p0/1185,i2_LQ_Rweevil_c3153/f1p20/2545,i2_LQ_Rweevil_c109206/f1p7/2679,i3_LQ_Rweevil_c42008/f1p39/3589,i2_HQ_Rweevil_c139473/f2p8/2032,i2_LQ_Rweevil_c38367/f1p5/2852,i2_LQ_Rweevil_c38010/f1p4/2512,i3_HQ_Rweevil_c31743/f11p0/3123,i5_LQ_Rweevil_c4662/f1p0/5091,i2_LQ_Rweevil_c88626/f1p2/2735,i3_HQ_Rweevil_c1882/f5p0/3217,i3_LQ_Rweevil_c27717/f1p0/3741,i2_HQ_Rweevil_c2548/f5p6/…
GO:0034504	protein localization to nucleus	biological_process	0.054893	0.78882	29	3203	184	27707	15	i1_LQ_Rweevil_c4272/f2p0/1985,i4_LQ_Rweevil_c4177/f1p1/4420,i2_LQ_Rweevil_c55224/f1p4/2604,i6_LQ_Rweevil_c412/f1p7/6586,i4_LQ_Rweevil_c6287/f1p2/4650,i2_LQ_Rweevil_c135408/f1p7/2494,i5_LQ_Rweevil_c1162/f1p0/5267,i3_LQ_Rweevil_c11141/f1p3/3205,i5_LQ_Rweevil_c1281/f1p0/5711,i8_LQ_Rweevil_c270/f1p0/8923,i5_LQ_Rweevil_c1823/f1p0/5203,i1_LQ_Rweevil_c67077/f1p0/1989,i3_LQ_Rweevil_c24250/f1p0/3313,i1_LQ…	14	i2_HQ_Rweevil_c139473/f2p8/2032,i3_LQ_Rweevil_c42008/f1p39/3589,i2_LQ_Rweevil_c3153/f1p20/2545,i1_LQ_Rweevil_c43311/f1p0/1185,i2_LQ_Rweevil_c109206/f1p7/2679,i2_LQ_Rweevil_c38367/f1p5/2852,i2_LQ_Rweevil_c38010/f1p4/2512,i3_HQ_Rweevil_c31743/f11p0/3123,i5_LQ_Rweevil_c4662/f1p0/5091,i3_HQ_Rweevil_c1882/f5p0/3217,i2_LQ_Rweevil_c88626/f1p2/2735,i3_LQ_Rweevil_c27717/f1p0/3741,i2_HQ_Rweevil_c2548/f5p6/…
GO:0044744	protein targeting to nucleus	biological_process	0.054893	0.78882	29	3203	184	27707	15	i3_LQ_Rweevil_c4988/f1p0/3263,i3_LQ_Rweevil_c24250/f1p0/3313,i1_LQ_Rweevil_c50155/f1p1/1754,i5_LQ_Rweevil_c1823/f1p0/5203,i8_LQ_Rweevil_c270/f1p0/8923,i1_LQ_Rweevil_c67077/f1p0/1989,i5_LQ_Rweevil_c1162/f1p0/5267,i3_LQ_Rweevil_c11141/f1p3/3205,i5_LQ_Rweevil_c1281/f1p0/5711,i6_LQ_Rweevil_c412/f1p7/6586,i4_LQ_Rweevil_c6287/f1p2/4650,i2_LQ_Rweevil_c135408/f1p7/2494,i4_LQ_Rweevil_c4177/f1p1/4420,i1_LQ…	14	i2_LQ_Rweevil_c154820/f1p6/2288,i3_HQ_Rweevil_c1882/f5p0/3217,i2_LQ_Rweevil_c88626/f1p2/2735,i3_LQ_Rweevil_c27717/f1p0/3741,i2_HQ_Rweevil_c2548/f5p6/2424,i3_HQ_Rweevil_c31743/f11p0/3123,i2_LQ_Rweevil_c38010/f1p4/2512,i5_LQ_Rweevil_c4662/f1p0/5091,i3_LQ_Rweevil_c42008/f1p39/3589,i2_HQ_Rweevil_c139473/f2p8/2032,i2_LQ_Rweevil_c109206/f1p7/2679,i1_LQ_Rweevil_c43311/f1p0/1185,i2_LQ_Rweevil_c3153/f1p20…
GO:0051170	nuclear import	biological_process	0.054893	0.78882	29	3203	184	27707	15	i3_LQ_Rweevil_c24250/f1p0/3313,i1_LQ_Rweevil_c50155/f1p1/1754,i3_LQ_Rweevil_c4988/f1p0/3263,i5_LQ_Rweevil_c1162/f1p0/5267,i3_LQ_Rweevil_c11141/f1p3/3205,i5_LQ_Rweevil_c1281/f1p0/5711,i8_LQ_Rweevil_c270/f1p0/8923,i5_LQ_Rweevil_c1823/f1p0/5203,i1_LQ_Rweevil_c67077/f1p0/1989,i1_LQ_Rweevil_c4272/f2p0/1985,i4_LQ_Rweevil_c4177/f1p1/4420,i2_LQ_Rweevil_c55224/f1p4/2604,i6_LQ_Rweevil_c412/f1p7/6586,i4_LQ_…	14	i2_LQ_Rweevil_c154820/f1p6/2288,i2_LQ_Rweevil_c88626/f1p2/2735,i3_HQ_Rweevil_c1882/f5p0/3217,i2_HQ_Rweevil_c2548/f5p6/2424,i3_LQ_Rweevil_c27717/f1p0/3741,i2_LQ_Rweevil_c38010/f1p4/2512,i3_HQ_Rweevil_c31743/f11p0/3123,i5_LQ_Rweevil_c4662/f1p0/5091,i2_LQ_Rweevil_c109206/f1p7/2679,i2_LQ_Rweevil_c3153/f1p20/2545,i1_LQ_Rweevil_c43311/f1p0/1185,i2_HQ_Rweevil_c139473/f2p8/2032,i3_LQ_Rweevil_c42008/f1p39…
GO:1902593	single-organism nuclear import	biological_process	0.054893	0.78882	29	3203	184	27707	15	i2_LQ_Rweevil_c55224/f1p4/2604,i4_LQ_Rweevil_c4177/f1p1/4420,i1_LQ_Rweevil_c4272/f2p0/1985,i2_LQ_Rweevil_c135408/f1p7/2494,i4_LQ_Rweevil_c6287/f1p2/4650,i6_LQ_Rweevil_c412/f1p7/6586,i1_LQ_Rweevil_c50155/f1p1/1754,i3_LQ_Rweevil_c24250/f1p0/3313,i3_LQ_Rweevil_c4988/f1p0/3263,i5_LQ_Rweevil_c1281/f1p0/5711,i3_LQ_Rweevil_c11141/f1p3/3205,i5_LQ_Rweevil_c1162/f1p0/5267,i1_LQ_Rweevil_c67077/f1p0/1989,i8_…	14	i5_LQ_Rweevil_c4662/f1p0/5091,i3_HQ_Rweevil_c31743/f11p0/3123,i2_LQ_Rweevil_c38010/f1p4/2512,i2_LQ_Rweevil_c38367/f1p5/2852,i1_LQ_Rweevil_c43311/f1p0/1185,i2_LQ_Rweevil_c3153/f1p20/2545,i2_LQ_Rweevil_c109206/f1p7/2679,i2_HQ_Rweevil_c139473/f2p8/2032,i3_LQ_Rweevil_c42008/f1p39/3589,i2_LQ_Rweevil_c154820/f1p6/2288,i3_LQ_Rweevil_c27717/f1p0/3741,i2_HQ_Rweevil_c2548/f5p6/2424,i2_LQ_Rweevil_c88626/f1p…
GO:0001948	glycoprotein binding	molecular_function	0.05496	0.78882	4	3203	13	27707	0		4	i4_LQ_Rweevil_c12083/f1p0/4527,i2_LQ_Rweevil_c26670/f1p4/2865,i5_LQ_Rweevil_c4802/f1p0/5023,i3_HQ_Rweevil_c40266/f6p0/3158
GO:0043394	proteoglycan binding	molecular_function	0.05496	0.78882	4	3203	13	27707	0		4	i2_LQ_Rweevil_c26670/f1p4/2865,i4_LQ_Rweevil_c12083/f1p0/4527,i3_HQ_Rweevil_c40266/f6p0/3158,i5_LQ_Rweevil_c4802/f1p0/5023
GO:0043395	heparan sulfate proteoglycan binding	molecular_function	0.05496	0.78882	4	3203	13	27707	0		4	i3_HQ_Rweevil_c40266/f6p0/3158,i5_LQ_Rweevil_c4802/f1p0/5023,i2_LQ_Rweevil_c26670/f1p4/2865,i4_LQ_Rweevil_c12083/f1p0/4527
GO:0006948	induction by virus of host cell-cell fusion	biological_process	0.057212	0.81835	5	3203	19	27707	2	i1_LQ_Rweevil_c50155/f1p1/1754,i1_LQ_Rweevil_c67077/f1p0/1989	3	i2_LQ_Rweevil_c57857/f1p4/2303,i2_LQ_Rweevil_c63268/f1p4/2227,i3_LQ_Rweevil_c5647/f1p0/3916
GO:0004298	threonine-type endopeptidase activity	molecular_function	0.057841	0.82173	6	3203	26	27707	1	i3_LQ_Rweevil_c17826/f1p12/3177	5	i1_HQ_Rweevil_c109553/f4p0/1083,i1_HQ_Rweevil_c83590/f11p3/1118,i0_HQ_Rweevil_c162/f18p0/926,i0_HQ_Rweevil_c918/f9p0/941,i0_HQ_Rweevil_c663/f8p0/839
GO:0070003	threonine-type peptidase activity	molecular_function	0.057841	0.82173	6	3203	26	27707	1	i3_LQ_Rweevil_c17826/f1p12/3177	5	i0_HQ_Rweevil_c663/f8p0/839,i1_HQ_Rweevil_c109553/f4p0/1083,i0_HQ_Rweevil_c918/f9p0/941,i0_HQ_Rweevil_c162/f18p0/926,i1_HQ_Rweevil_c83590/f11p3/1118
GO:0090407	organophosphate biosynthetic process	biological_process	0.060941	0.85636	57	3203	407	27707	34	i4_LQ_Rweevil_c7548/f1p0/4229,i6_LQ_Rweevil_c825/f1p16/6429,i4_LQ_Rweevil_c13238/f1p0/4044,i1_LQ_Rweevil_c80080/f1p0/1860,i2_LQ_Rweevil_c95262/f1p1/2078,i0_LQ_Rweevil_c30759/f1p0/656,i3_LQ_Rweevil_c23430/f1p4/3618,i0_LQ_Rweevil_c72444/f1p0/790,i2_LQ_Rweevil_c8751/f1p23/3093,i2_HQ_Rweevil_c54608/f2p4/2854,i2_LQ_Rweevil_c25688/f1p13/2199,i2_LQ_Rweevil_c2998/f1p3/2300,i3_LQ_Rweevil_c25387/f1p0/3974,…	23	i2_LQ_Rweevil_c71487/f1p3/2094,i1_HQ_Rweevil_c13339/f3p12/1798,i2_HQ_Rweevil_c148481/f56p0/2908,i1_HQ_Rweevil_c11550/f5p0/1522,i2_HQ_Rweevil_c73812/f71p8/2921,i6_LQ_Rweevil_c1261/f1p0/6409,i0_LQ_Rweevil_c52386/f1p0/778,i1_LQ_Rweevil_c27707/f1p0/1497,i1_LQ_Rweevil_c82747/f1p0/1922,i1_HQ_Rweevil_c121140/f49p0/1116,i2_LQ_Rweevil_c108641/f1p22/2954,i1_LQ_Rweevil_c34927/f1p56/1047,i1_LQ_Rweevil_c72411…
GO:0016854	racemase and epimerase activity	molecular_function	0.061683	0.85636	6	3203	25	27707	1	i3_LQ_Rweevil_c5876/f1p0/3592	5	i3_LQ_Rweevil_c2747/f1p0/3313,i4_LQ_Rweevil_c10606/f1p6/4589,i4_LQ_Rweevil_c5628/f1p0/4227,i2_HQ_Rweevil_c73820/f17p1/2269,i1_HQ_Rweevil_c13339/f3p12/1798
GO:0019048	modulation by virus of host morphology or physiology	biological_process	0.062197	0.85636	10	3203	51	27707	5	i1_LQ_Rweevil_c67077/f1p0/1989,i2_HQ_Rweevil_c60720/f3p2/2422,i2_LQ_Rweevil_c55603/f1p2/2956,i1_LQ_Rweevil_c50155/f1p1/1754,i3_HQ_Rweevil_c5040/f2p0/3247	5	i2_LQ_Rweevil_c63268/f1p4/2227,i2_HQ_Rweevil_c118314/f2p1/2060,i2_LQ_Rweevil_c57857/f1p4/2303,i3_LQ_Rweevil_c5647/f1p0/3916,i0_HQ_Rweevil_c881/f7p5/919
GO:0007339	binding of sperm to zona pellucida	biological_process	0.062199	0.85636	7	3203	31	27707	4	i2_LQ_Rweevil_c135544/f1p43/2975,i3_LQ_Rweevil_c20294/f1p0/3945,i5_LQ_Rweevil_c1571/f1p32/5873,i5_LQ_Rweevil_c4055/f1p6/5925	3	i3_LQ_Rweevil_c13532/f1p0/3124,i4_LQ_Rweevil_c9987/f1p0/4159,i4_LQ_Rweevil_c3027/f1p0/4655
GO:0008037	cell recognition	biological_process	0.062199	0.85636	7	3203	31	27707	4	i5_LQ_Rweevil_c4055/f1p6/5925,i5_LQ_Rweevil_c1571/f1p32/5873,i2_LQ_Rweevil_c135544/f1p43/2975,i3_LQ_Rweevil_c20294/f1p0/3945	3	i4_LQ_Rweevil_c3027/f1p0/4655,i4_LQ_Rweevil_c9987/f1p0/4159,i3_LQ_Rweevil_c13532/f1p0/3124
GO:0009988	cell-cell recognition	biological_process	0.062199	0.85636	7	3203	31	27707	4	i5_LQ_Rweevil_c4055/f1p6/5925,i5_LQ_Rweevil_c1571/f1p32/5873,i2_LQ_Rweevil_c135544/f1p43/2975,i3_LQ_Rweevil_c20294/f1p0/3945	3	i4_LQ_Rweevil_c3027/f1p0/4655,i4_LQ_Rweevil_c9987/f1p0/4159,i3_LQ_Rweevil_c13532/f1p0/3124
GO:0035036	sperm-egg recognition	biological_process	0.062199	0.85636	7	3203	31	27707	4	i3_LQ_Rweevil_c20294/f1p0/3945,i2_LQ_Rweevil_c135544/f1p43/2975,i5_LQ_Rweevil_c1571/f1p32/5873,i5_LQ_Rweevil_c4055/f1p6/5925	3	i3_LQ_Rweevil_c13532/f1p0/3124,i4_LQ_Rweevil_c9987/f1p0/4159,i4_LQ_Rweevil_c3027/f1p0/4655
GO:0006879	cellular iron ion homeostasis	biological_process	0.062322	0.85636	10	3203	53	27707	10	i2_LQ_Rweevil_c13608/f1p0/2291,i1_LQ_Rweevil_c68931/f1p5/1173,i2_LQ_Rweevil_c38847/f1p23/2427,i1_LQ_Rweevil_c35031/f1p0/1055,i0_LQ_Rweevil_c9463/f1p0/919,i0_LQ_Rweevil_c56352/f1p0/985,i0_LQ_Rweevil_c38022/f1p0/855,i0_LQ_Rweevil_c50902/f1p0/830,i2_HQ_Rweevil_c81693/f2p26/2254,i1_LQ_Rweevil_c90215/f1p0/1106	0
GO:0046916	cellular transition metal ion homeostasis	biological_process	0.062322	0.85636	10	3203	53	27707	10	i0_LQ_Rweevil_c9463/f1p0/919,i0_LQ_Rweevil_c56352/f1p0/985,i1_LQ_Rweevil_c35031/f1p0/1055,i2_LQ_Rweevil_c38847/f1p23/2427,i1_LQ_Rweevil_c68931/f1p5/1173,i2_LQ_Rweevil_c13608/f1p0/2291,i1_LQ_Rweevil_c90215/f1p0/1106,i2_HQ_Rweevil_c81693/f2p26/2254,i0_LQ_Rweevil_c50902/f1p0/830,i0_LQ_Rweevil_c38022/f1p0/855	0
GO:0055072	iron ion homeostasis	biological_process	0.062322	0.85636	10	3203	53	27707	10	i0_LQ_Rweevil_c56352/f1p0/985,i0_LQ_Rweevil_c9463/f1p0/919,i1_LQ_Rweevil_c35031/f1p0/1055,i2_LQ_Rweevil_c38847/f1p23/2427,i1_LQ_Rweevil_c68931/f1p5/1173,i2_LQ_Rweevil_c13608/f1p0/2291,i1_LQ_Rweevil_c90215/f1p0/1106,i2_HQ_Rweevil_c81693/f2p26/2254,i0_LQ_Rweevil_c50902/f1p0/830,i0_LQ_Rweevil_c38022/f1p0/855	0
GO:0045995	regulation of embryonic development	biological_process	0.062853	0.86083	6	3203	25	27707	3	i1_LQ_Rweevil_c67077/f1p0/1989,i2_LQ_Rweevil_c55224/f1p4/2604,i1_LQ_Rweevil_c50155/f1p1/1754	3	i11_LQ_Rweevil_c12/f1p0/11139,i2_LQ_Rweevil_c58118/f1p0/2812,i7_LQ_Rweevil_c114/f1p0/7273
GO:0006814	sodium ion transport	biological_process	0.06437	0.87707	14	3203	79	27707	12	i2_HQ_Rweevil_c126549/f5p0/2165,i2_LQ_Rweevil_c105435/f1p36/2773,i5_LQ_Rweevil_c929/f1p0/5947,i1_LQ_Rweevil_c6630/f1p0/1720,i0_LQ_Rweevil_c23142/f1p0/848,i2_LQ_Rweevil_c19793/f1p2/2470,i4_LQ_Rweevil_c4609/f1p0/4755,i2_LQ_Rweevil_c13338/f1p4/2300,i0_LQ_Rweevil_c27279/f1p3/610,i6_LQ_Rweevil_c1913/f1p0/6208,i3_LQ_Rweevil_c33749/f1p0/3389,i2_HQ_Rweevil_c128926/f2p4/2512	2	i2_LQ_Rweevil_c37484/f1p13/2963,i2_LQ_Rweevil_c87508/f1p0/2164
GO:0001871	pattern binding	molecular_function	0.064666	0.87707	8	3203	38	27707	4	i3_LQ_Rweevil_c36372/f1p0/3295,i2_LQ_Rweevil_c61717/f1p11/2209,i3_HQ_Rweevil_c2046/f2p1/3370,i3_HQ_Rweevil_c39296/f2p1/3465	4	i4_LQ_Rweevil_c7404/f1p0/4653,i2_HQ_Rweevil_c99634/f29p3/2185,i1_HQ_Rweevil_c8704/f2p11/1812,i1_LQ_Rweevil_c22321/f1p0/1923
GO:0030247	polysaccharide binding	molecular_function	0.064666	0.87707	8	3203	38	27707	4	i2_LQ_Rweevil_c61717/f1p11/2209,i3_HQ_Rweevil_c2046/f2p1/3370,i3_HQ_Rweevil_c39296/f2p1/3465,i3_LQ_Rweevil_c36372/f1p0/3295	4	i1_LQ_Rweevil_c22321/f1p0/1923,i2_HQ_Rweevil_c99634/f29p3/2185,i1_HQ_Rweevil_c8704/f2p11/1812,i4_LQ_Rweevil_c7404/f1p0/4653
GO:0042775	mitochondrial ATP synthesis coupled electron transport	biological_process	0.065445	0.88355	4	3203	14	27707	4	i4_HQ_Rweevil_c1158/f4p0/4431,i5_LQ_Rweevil_c3832/f1p6/5509,i4_LQ_Rweevil_c7765/f1p0/4625,i5_HQ_Rweevil_c557/f2p0/5530	0
GO:0051273	beta-glucan metabolic process	biological_process	0.065758	0.88355	6	3203	26	27707	1	i2_HQ_Rweevil_c34506/f2p1/2172	5	i2_HQ_Rweevil_c47113/f2p13/2048,i2_LQ_Rweevil_c49875/f1p14/2095,i2_LQ_Rweevil_c110094/f1p13/2480,i2_LQ_Rweevil_c29757/f1p13/2068,i2_LQ_Rweevil_c69977/f1p13/2074
GO:0019783	ubiquitin-like protein-specific protease activity	molecular_function	0.067916	0.88355	7	3203	32	27707	2	i4_LQ_Rweevil_c10967/f1p0/4308,i4_LQ_Rweevil_c11311/f1p0/4458	5	i2_LQ_Rweevil_c142681/f1p1/2102,i2_LQ_Rweevil_c59462/f1p1/2443,i1_HQ_Rweevil_c84508/f5p0/1096,i5_HQ_Rweevil_c5312/f4p0/5132,i1_LQ_Rweevil_c80501/f1p0/1929
GO:0009379	Holliday junction helicase complex	cellular_component	0.068197	0.88355	4	3203	14	27707	0		4	i2_LQ_Rweevil_c29591/f1p2/2046,i1_HQ_Rweevil_c1884/f8p13/1977,i2_LQ_Rweevil_c38232/f1p1/2266,i2_HQ_Rweevil_c1820/f27p2/2639
GO:0048476	Holliday junction resolvase complex	cellular_component	0.068197	0.88355	4	3203	14	27707	0		4	i1_HQ_Rweevil_c1884/f8p13/1977,i2_LQ_Rweevil_c29591/f1p2/2046,i2_HQ_Rweevil_c1820/f27p2/2639,i2_LQ_Rweevil_c38232/f1p1/2266
GO:0001733	galactosylceramide sulfotransferase activity	molecular_function	0.068241	0.88355	2	3203	4	27707	0		2	i3_HQ_Rweevil_c5994/f3p0/3652,i2_LQ_Rweevil_c77690/f1p1/2690
GO:0050694	galactose 3-O-sulfotransferase activity	molecular_function	0.068241	0.88355	2	3203	4	27707	0		2	i2_LQ_Rweevil_c77690/f1p1/2690,i3_HQ_Rweevil_c5994/f3p0/3652
GO:0032039	integrator complex	cellular_component	0.068831	0.88355	2	3203	4	27707	1	i2_LQ_Rweevil_c88636/f1p7/1703	1	i3_LQ_Rweevil_c13384/f1p10/3889
GO:0006625	protein targeting to peroxisome	biological_process	0.068972	0.88355	5	3203	20	27707	0		5	i2_LQ_Rweevil_c85150/f1p6/2680,i2_LQ_Rweevil_c82722/f1p0/2507,i2_LQ_Rweevil_c23450/f1p5/2669,i2_LQ_Rweevil_c22287/f1p4/2889,i2_LQ_Rweevil_c116774/f1p1/2668
GO:0016558	protein import into peroxisome matrix	biological_process	0.068972	0.88355	5	3203	20	27707	0		5	i2_LQ_Rweevil_c85150/f1p6/2680,i2_LQ_Rweevil_c23450/f1p5/2669,i2_LQ_Rweevil_c82722/f1p0/2507,i2_LQ_Rweevil_c22287/f1p4/2889,i2_LQ_Rweevil_c116774/f1p1/2668
GO:0016560	protein import into peroxisome matrix, docking	biological_process	0.068972	0.88355	5	3203	20	27707	0		5	i2_LQ_Rweevil_c82722/f1p0/2507,i2_LQ_Rweevil_c23450/f1p5/2669,i2_LQ_Rweevil_c85150/f1p6/2680,i2_LQ_Rweevil_c116774/f1p1/2668,i2_LQ_Rweevil_c22287/f1p4/2889
GO:0022615	protein to membrane docking	biological_process	0.068972	0.88355	5	3203	20	27707	0		5	i2_LQ_Rweevil_c85150/f1p6/2680,i2_LQ_Rweevil_c82722/f1p0/2507,i2_LQ_Rweevil_c23450/f1p5/2669,i2_LQ_Rweevil_c22287/f1p4/2889,i2_LQ_Rweevil_c116774/f1p1/2668
GO:0043574	peroxisomal transport	biological_process	0.068972	0.88355	5	3203	20	27707	0		5	i2_LQ_Rweevil_c22287/f1p4/2889,i2_LQ_Rweevil_c116774/f1p1/2668,i2_LQ_Rweevil_c85150/f1p6/2680,i2_LQ_Rweevil_c23450/f1p5/2669,i2_LQ_Rweevil_c82722/f1p0/2507
GO:0072662	protein localization to peroxisome	biological_process	0.068972	0.88355	5	3203	20	27707	0		5	i2_LQ_Rweevil_c23450/f1p5/2669,i2_LQ_Rweevil_c82722/f1p0/2507,i2_LQ_Rweevil_c85150/f1p6/2680,i2_LQ_Rweevil_c116774/f1p1/2668,i2_LQ_Rweevil_c22287/f1p4/2889
GO:0072663	establishment of protein localization to peroxisome	biological_process	0.068972	0.88355	5	3203	20	27707	0		5	i2_LQ_Rweevil_c116774/f1p1/2668,i2_LQ_Rweevil_c22287/f1p4/2889,i2_LQ_Rweevil_c82722/f1p0/2507,i2_LQ_Rweevil_c23450/f1p5/2669,i2_LQ_Rweevil_c85150/f1p6/2680
GO:0004779	sulfate adenylyltransferase activity	molecular_function	0.069324	0.88355	2	3203	4	27707	0		2	i2_HQ_Rweevil_c1810/f21p0/2408,i3_LQ_Rweevil_c4248/f1p0/3458
GO:0004781	sulfate adenylyltransferase (ATP) activity	molecular_function	0.069324	0.88355	2	3203	4	27707	0		2	i2_HQ_Rweevil_c1810/f21p0/2408,i3_LQ_Rweevil_c4248/f1p0/3458
GO:0017006	protein-tetrapyrrole linkage	biological_process	0.06936	0.88355	2	3203	4	27707	2	i2_LQ_Rweevil_c25352/f1p12/2343,i4_LQ_Rweevil_c3011/f1p0/4716	0
GO:0017007	protein-bilin linkage	biological_process	0.06936	0.88355	2	3203	4	27707	2	i4_LQ_Rweevil_c3011/f1p0/4716,i2_LQ_Rweevil_c25352/f1p12/2343	0
GO:0017009	protein-phycocyanobilin linkage	biological_process	0.06936	0.88355	2	3203	4	27707	2	i4_LQ_Rweevil_c3011/f1p0/4716,i2_LQ_Rweevil_c25352/f1p12/2343	0
GO:0009790	embryo development	biological_process	0.073161	0.92914	6	3203	26	27707	3	i2_LQ_Rweevil_c55224/f1p4/2604,i1_LQ_Rweevil_c50155/f1p1/1754,i1_LQ_Rweevil_c67077/f1p0/1989	3	i11_LQ_Rweevil_c12/f1p0/11139,i7_LQ_Rweevil_c114/f1p0/7273,i2_LQ_Rweevil_c58118/f1p0/2812
GO:0044281	small molecule metabolic process	biological_process	0.073776	0.93413	157	3203	1220	27707	95	i2_LQ_Rweevil_c84177/f1p13/3126,i4_HQ_Rweevil_c1158/f4p0/4431,i4_LQ_Rweevil_c5997/f1p1/4781,i4_LQ_Rweevil_c5401/f1p17/4233,i1_LQ_Rweevil_c50912/f1p0/1656,i1_LQ_Rweevil_c5098/f1p0/1686,i2_LQ_Rweevil_c82705/f1p23/2501,i2_HQ_Rweevil_c31818/f23p3/2955,i5_HQ_Rweevil_c430/f2p0/5534,i3_HQ_Rweevil_c17946/f2p9/3378,i2_LQ_Rweevil_c29924/f1p3/2108,i2_LQ_Rweevil_c153769/f1p8/2884,i3_LQ_Rweevil_c6668/f1p0/316…	62	i1_HQ_Rweevil_c96480/f7p0/1646,i1_LQ_Rweevil_c91074/f1p0/1127,i3_LQ_Rweevil_c27781/f1p1/4007,i2_LQ_Rweevil_c18578/f1p0/2624,i2_LQ_Rweevil_c113245/f1p3/2425,i2_LQ_Rweevil_c115091/f1p20/2356,i2_LQ_Rweevil_c22765/f1p28/2229,i2_LQ_Rweevil_c27658/f1p8/2769,i2_LQ_Rweevil_c19198/f1p4/2328,i0_LQ_Rweevil_c22873/f1p0/943,i3_LQ_Rweevil_c25589/f1p0/3141,i2_LQ_Rweevil_c108641/f1p22/2954,i1_HQ_Rweevil_c13339/f…
GO:0030155	regulation of cell adhesion	biological_process	0.073999	0.93413	6	3203	26	27707	3	i1_LQ_Rweevil_c50155/f1p1/1754,i2_LQ_Rweevil_c55224/f1p4/2604,i1_LQ_Rweevil_c67077/f1p0/1989	3	i2_LQ_Rweevil_c58118/f1p0/2812,i7_LQ_Rweevil_c114/f1p0/7273,i11_LQ_Rweevil_c12/f1p0/11139
GO:0044282	small molecule catabolic process	biological_process	0.075749	0.93776	13	3203	73	27707	6	i1_LQ_Rweevil_c11458/f1p0/1570,i2_LQ_Rweevil_c25225/f1p8/2143,i3_LQ_Rweevil_c23226/f1p0/3675,i3_LQ_Rweevil_c6668/f1p0/3161,i4_LQ_Rweevil_c5997/f1p1/4781,i1_LQ_Rweevil_c6712/f1p0/1175	7	i1_LQ_Rweevil_c91074/f1p0/1127,i2_LQ_Rweevil_c22765/f1p28/2229,i3_LQ_Rweevil_c37002/f1p1/3256,i1_LQ_Rweevil_c16810/f1p0/1069,i7_LQ_Rweevil_c453/f1p0/7423,i3_LQ_Rweevil_c27969/f1p0/3702,i0_LQ_Rweevil_c60066/f1p0/893
GO:0055076	transition metal ion homeostasis	biological_process	0.076512	0.93776	10	3203	55	27707	10	i0_LQ_Rweevil_c9463/f1p0/919,i1_LQ_Rweevil_c35031/f1p0/1055,i0_LQ_Rweevil_c56352/f1p0/985,i2_LQ_Rweevil_c38847/f1p23/2427,i1_LQ_Rweevil_c68931/f1p5/1173,i2_LQ_Rweevil_c13608/f1p0/2291,i1_LQ_Rweevil_c90215/f1p0/1106,i2_HQ_Rweevil_c81693/f2p26/2254,i0_LQ_Rweevil_c50902/f1p0/830,i0_LQ_Rweevil_c38022/f1p0/855	0
GO:0008199	ferric iron binding	molecular_function	0.07679	0.93776	10	3203	55	27707	10	i1_LQ_Rweevil_c68931/f1p5/1173,i2_LQ_Rweevil_c13608/f1p0/2291,i0_LQ_Rweevil_c56352/f1p0/985,i0_LQ_Rweevil_c9463/f1p0/919,i1_LQ_Rweevil_c35031/f1p0/1055,i2_LQ_Rweevil_c38847/f1p23/2427,i2_HQ_Rweevil_c81693/f2p26/2254,i0_LQ_Rweevil_c50902/f1p0/830,i0_LQ_Rweevil_c38022/f1p0/855,i1_LQ_Rweevil_c90215/f1p0/1106	0
GO:0007016	cytoskeletal anchoring at plasma membrane	biological_process	0.076882	0.93776	3	3203	9	27707	1	i2_LQ_Rweevil_c58365/f1p10/1997	2	i4_HQ_Rweevil_c630/f11p0/4888,i5_LQ_Rweevil_c5160/f1p0/5009
GO:0002685	regulation of leukocyte migration	biological_process	0.077055	0.93776	3	3203	9	27707	2	i1_LQ_Rweevil_c12972/f1p60/1762,i1_LQ_Rweevil_c10445/f1p0/1939	1	i3_LQ_Rweevil_c19966/f1p0/3112
GO:0050853	B cell receptor signaling pathway	biological_process	0.077055	0.93776	3	3203	9	27707	2	i1_LQ_Rweevil_c12972/f1p60/1762,i1_LQ_Rweevil_c10445/f1p0/1939	1	i3_LQ_Rweevil_c19966/f1p0/3112
GO:0050854	regulation of antigen receptor-mediated signaling pathway	biological_process	0.077055	0.93776	3	3203	9	27707	2	i1_LQ_Rweevil_c12972/f1p60/1762,i1_LQ_Rweevil_c10445/f1p0/1939	1	i3_LQ_Rweevil_c19966/f1p0/3112
GO:0050855	regulation of B cell receptor signaling pathway	biological_process	0.077055	0.93776	3	3203	9	27707	2	i1_LQ_Rweevil_c10445/f1p0/1939,i1_LQ_Rweevil_c12972/f1p60/1762	1	i3_LQ_Rweevil_c19966/f1p0/3112
GO:0050900	leukocyte migration	biological_process	0.077055	0.93776	3	3203	9	27707	2	i1_LQ_Rweevil_c12972/f1p60/1762,i1_LQ_Rweevil_c10445/f1p0/1939	1	i3_LQ_Rweevil_c19966/f1p0/3112
GO:0072676	lymphocyte migration	biological_process	0.077055	0.93776	3	3203	9	27707	2	i1_LQ_Rweevil_c12972/f1p60/1762,i1_LQ_Rweevil_c10445/f1p0/1939	1	i3_LQ_Rweevil_c19966/f1p0/3112
GO:2000401	regulation of lymphocyte migration	biological_process	0.077055	0.93776	3	3203	9	27707	2	i1_LQ_Rweevil_c10445/f1p0/1939,i1_LQ_Rweevil_c12972/f1p60/1762	1	i3_LQ_Rweevil_c19966/f1p0/3112
GO:0042278	purine nucleoside metabolic process	biological_process	0.077394	0.93776	46	3203	326	27707	31	i0_LQ_Rweevil_c33680/f1p0/515,i1_LQ_Rweevil_c34353/f1p0/1023,i2_LQ_Rweevil_c14630/f1p6/2131,i2_LQ_Rweevil_c82705/f1p23/2501,i5_HQ_Rweevil_c557/f2p0/5530,i0_LQ_Rweevil_c37758/f1p0/987,i4_HQ_Rweevil_c1158/f4p0/4431,i0_LQ_Rweevil_c91019/f2p0/884,i0_LQ_Rweevil_c26298/f1p0/337,i2_LQ_Rweevil_c36370/f1p27/2340,i1_LQ_Rweevil_c23034/f1p5/1677,i0_LQ_Rweevil_c23175/f1p7/817,i2_LQ_Rweevil_c8751/f1p23/3093,i2…	15	i1_LQ_Rweevil_c34927/f1p56/1047,i3_LQ_Rweevil_c15089/f1p1/3036,i2_LQ_Rweevil_c104991/f1p4/2181,i2_LQ_Rweevil_c87523/f1p5/2582,i2_HQ_Rweevil_c60499/f2p18/3879,i2_LQ_Rweevil_c108641/f1p22/2954,i1_HQ_Rweevil_c121140/f49p0/1116,i1_HQ_Rweevil_c96480/f7p0/1646,i3_LQ_Rweevil_c7589/f1p21/3380,i2_LQ_Rweevil_c24555/f1p5/2795,i2_LQ_Rweevil_c85130/f1p0/2686,i2_LQ_Rweevil_c71487/f1p3/2094,i6_LQ_Rweevil_c1261/…
GO:0046128	purine ribonucleoside metabolic process	biological_process	0.077394	0.93776	46	3203	326	27707	31	i1_LQ_Rweevil_c29610/f1p4/1799,i2_LQ_Rweevil_c153769/f1p8/2884,i0_LQ_Rweevil_c58216/f1p0/679,i4_LQ_Rweevil_c7765/f1p0/4625,i2_LQ_Rweevil_c58898/f1p0/2662,i2_HQ_Rweevil_c78235/f2p2/2278,i0_LQ_Rweevil_c32571/f1p0/845,i2_LQ_Rweevil_c29924/f1p3/2108,i5_LQ_Rweevil_c3832/f1p6/5509,i1_LQ_Rweevil_c5955/f1p0/1950,i6_LQ_Rweevil_c825/f1p16/6429,i4_LQ_Rweevil_c7548/f1p0/4229,i4_LQ_Rweevil_c13238/f1p0/4044,i1…	15	i2_HQ_Rweevil_c148481/f56p0/2908,i2_HQ_Rweevil_c73812/f71p8/2921,i6_LQ_Rweevil_c1261/f1p0/6409,i2_LQ_Rweevil_c71487/f1p3/2094,i3_LQ_Rweevil_c7589/f1p21/3380,i2_LQ_Rweevil_c85130/f1p0/2686,i2_LQ_Rweevil_c24555/f1p5/2795,i1_HQ_Rweevil_c96480/f7p0/1646,i1_HQ_Rweevil_c121140/f49p0/1116,i2_LQ_Rweevil_c108641/f1p22/2954,i1_LQ_Rweevil_c34927/f1p56/1047,i2_LQ_Rweevil_c87523/f1p5/2582,i2_HQ_Rweevil_c60499…
GO:0005882	intermediate filament	cellular_component	0.077643	0.93776	26	3203	167	27707	19	i2_LQ_Rweevil_c8029/f1p66/2558,i2_LQ_Rweevil_c19251/f1p2/2262,i3_LQ_Rweevil_c11141/f1p3/3205,i5_LQ_Rweevil_c1162/f1p0/5267,i5_LQ_Rweevil_c1281/f1p0/5711,i2_LQ_Rweevil_c44631/f1p79/2754,i2_LQ_Rweevil_c25362/f1p1/2318,i3_LQ_Rweevil_c27353/f1p9/3231,i3_LQ_Rweevil_c4988/f1p0/3263,i2_HQ_Rweevil_c2170/f2p8/2331,i1_LQ_Rweevil_c6852/f1p0/1890,i3_LQ_Rweevil_c4701/f1p1/3242,i3_LQ_Rweevil_c28239/f1p0/3371,i…	7	i3_LQ_Rweevil_c9525/f1p0/3755,i3_HQ_Rweevil_c17415/f2p0/3076,i1_HQ_Rweevil_c1101/f24p0/1812,i2_LQ_Rweevil_c31521/f1p17/2037,i2_HQ_Rweevil_c1904/f10p3/2685,i2_LQ_Rweevil_c80275/f1p2/2521,i2_LQ_Rweevil_c3153/f1p20/2545
GO:0045111	intermediate filament cytoskeleton	cellular_component	0.077643	0.93776	26	3203	167	27707	19	i2_LQ_Rweevil_c135408/f1p7/2494,i4_LQ_Rweevil_c6287/f1p2/4650,i1_LQ_Rweevil_c7708/f1p18/1527,i3_LQ_Rweevil_c34446/f1p2/3132,i2_LQ_Rweevil_c55224/f1p4/2604,i2_LQ_Rweevil_c48973/f1p10/2103,i2_HQ_Rweevil_c2170/f2p8/2331,i3_LQ_Rweevil_c27353/f1p9/3231,i3_LQ_Rweevil_c4988/f1p0/3263,i3_LQ_Rweevil_c4701/f1p1/3242,i3_LQ_Rweevil_c28239/f1p0/3371,i1_LQ_Rweevil_c6852/f1p0/1890,i2_LQ_Rweevil_c19251/f1p2/2262…	7	i2_LQ_Rweevil_c3153/f1p20/2545,i3_HQ_Rweevil_c17415/f2p0/3076,i1_HQ_Rweevil_c1101/f24p0/1812,i2_LQ_Rweevil_c31521/f1p17/2037,i2_LQ_Rweevil_c80275/f1p2/2521,i2_HQ_Rweevil_c1904/f10p3/2685,i3_LQ_Rweevil_c9525/f1p0/3755
GO:0004252	serine-type endopeptidase activity	molecular_function	0.078896	0.95015	45	3203	316	27707	12	i3_LQ_Rweevil_c5871/f1p0/3578,i3_LQ_Rweevil_c20544/f1p0/3254,i0_LQ_Rweevil_c13562/f1p0/955,i4_LQ_Rweevil_c10657/f1p2/4801,i0_LQ_Rweevil_c35763/f1p0/856,i2_HQ_Rweevil_c44054/f6p2/2732,i2_LQ_Rweevil_c103762/f1p0/2407,i6_LQ_Rweevil_c606/f1p0/6968,i7_LQ_Rweevil_c551/f1p0/7327,i3_LQ_Rweevil_c13845/f1p0/3080,i2_LQ_Rweevil_c149921/f1p4/2491,i3_LQ_Rweevil_c22682/f1p0/3878	33	i4_LQ_Rweevil_c9033/f1p1/4584,i2_LQ_Rweevil_c84575/f1p17/2603,i3_LQ_Rweevil_c26893/f1p0/3206,i1_LQ_Rweevil_c30339/f1p0/1320,i1_LQ_Rweevil_c4550/f1p4/1686,i8_LQ_Rweevil_c152/f1p0/8311,i1_HQ_Rweevil_c3295/f7p0/1542,i1_HQ_Rweevil_c12995/f2p3/1350,i1_LQ_Rweevil_c76283/f1p0/1738,i1_HQ_Rweevil_c121309/f43p0/1408,i1_LQ_Rweevil_c71682/f1p0/1951,i3_LQ_Rweevil_c6963/f1p0/3491,i2_LQ_Rweevil_c56332/f2p2/2889…
GO:0005839	proteasome core complex	cellular_component	0.07967	0.955	6	3203	28	27707	1	i3_LQ_Rweevil_c17826/f1p12/3177	5	i0_HQ_Rweevil_c162/f18p0/926,i0_HQ_Rweevil_c918/f9p0/941,i1_HQ_Rweevil_c83590/f11p3/1118,i1_HQ_Rweevil_c109553/f4p0/1083,i0_HQ_Rweevil_c663/f8p0/839
GO:0050662	coenzyme binding	molecular_function	0.079754	0.955	82	3203	611	27707	53	i0_HQ_Rweevil_c11090/f4p0/886,i2_LQ_Rweevil_c112919/f1p4/2752,i1_LQ_Rweevil_c41584/f1p0/1719,i1_HQ_Rweevil_c25193/f2p0/1432,i2_LQ_Rweevil_c125556/f1p10/2091,i1_LQ_Rweevil_c22298/f1p2/1607,i3_LQ_Rweevil_c30150/f1p0/3011,i3_HQ_Rweevil_c17540/f4p20/3813,i0_HQ_Rweevil_c553/f11p0/888,i2_LQ_Rweevil_c31183/f1p10/2100,i4_LQ_Rweevil_c12777/f1p0/4036,i2_LQ_Rweevil_c164541/f1p10/2003,i1_LQ_Rweevil_c54212/f1…	29	i4_LQ_Rweevil_c2654/f1p1/4583,i3_LQ_Rweevil_c43158/f1p0/3009,i2_LQ_Rweevil_c94917/f1p6/1981,i3_HQ_Rweevil_c1440/f7p0/3196,i2_HQ_Rweevil_c2161/f5p2/2434,i2_LQ_Rweevil_c108645/f1p6/2872,i2_LQ_Rweevil_c146240/f1p22/2089,i2_LQ_Rweevil_c132564/f1p2/2835,i2_LQ_Rweevil_c50015/f1p1/2112,i1_HQ_Rweevil_c65071/f5p0/1051,i2_LQ_Rweevil_c111421/f1p10/2449,i1_HQ_Rweevil_c52526/f2p0/1825,i4_LQ_Rweevil_c4465/f1p4…
GO:0007155	cell adhesion	biological_process	0.080253	0.95824	50	3203	352	27707	22	i6_LQ_Rweevil_c2214/f1p0/6047,i1_LQ_Rweevil_c67077/f1p0/1989,i7_LQ_Rweevil_c263/f1p62/7762,i3_LQ_Rweevil_c26367/f1p3/3224,i2_LQ_Rweevil_c14795/f1p4/2163,i3_LQ_Rweevil_c22441/f1p1/3452,i2_LQ_Rweevil_c55224/f1p4/2604,i2_LQ_Rweevil_c5064/f1p14/2218,i3_LQ_Rweevil_c24686/f1p8/3862,i2_LQ_Rweevil_c45490/f1p24/3131,i1_LQ_Rweevil_c67604/f1p0/1751,i2_HQ_Rweevil_c56536/f3p4/2845,i2_HQ_Rweevil_c147837/f3p5/2…	28	i4_HQ_Rweevil_c1117/f4p0/4280,i4_LQ_Rweevil_c13413/f1p2/4066,i2_LQ_Rweevil_c31521/f1p17/2037,i9_LQ_Rweevil_c137/f1p0/9324,i3_LQ_Rweevil_c7989/f1p0/3169,i2_LQ_Rweevil_c108261/f1p2/2820,i3_LQ_Rweevil_c7034/f2p0/3847,i3_LQ_Rweevil_c15016/f1p6/3063,i1_LQ_Rweevil_c31604/f1p0/1328,i2_LQ_Rweevil_c58118/f1p0/2812,i4_LQ_Rweevil_c5576/f1p0/4591,i4_HQ_Rweevil_c13553/f26p6/4312,i3_LQ_Rweevil_c17700/f2p6/3381…
GO:0008237	metallopeptidase activity	molecular_function	0.080501	0.95847	45	3203	314	27707	12	i2_HQ_Rweevil_c56536/f3p4/2845,i3_LQ_Rweevil_c7081/f1p0/3325,i3_LQ_Rweevil_c8473/f1p61/3346,i2_HQ_Rweevil_c10283/f4p0/2471,i3_LQ_Rweevil_c28634/f1p0/3315,i2_LQ_Rweevil_c58898/f1p0/2662,i2_HQ_Rweevil_c51476/f23p7/2214,i2_LQ_Rweevil_c86239/f1p4/2508,i3_LQ_Rweevil_c13466/f1p25/3434,i1_HQ_Rweevil_c7099/f5p0/1390,i3_HQ_Rweevil_c1991/f2p0/3328,i1_LQ_Rweevil_c59990/f1p12/1974	33	i2_LQ_Rweevil_c77938/f1p8/2310,i4_LQ_Rweevil_c8506/f1p0/4676,i3_HQ_Rweevil_c32021/f18p4/3116,i3_HQ_Rweevil_c8079/f3p0/3413,i1_HQ_Rweevil_c12369/f7p0/1540,i3_HQ_Rweevil_c40793/f26p0/3200,i3_LQ_Rweevil_c43190/f1p25/3041,i2_HQ_Rweevil_c50782/f36p6/2498,i5_LQ_Rweevil_c1587/f1p0/5064,i2_HQ_Rweevil_c60499/f2p18/3879,i3_LQ_Rweevil_c42027/f1p5/3089,i1_LQ_Rweevil_c27449/f1p12/1899,i2_HQ_Rweevil_c146831/f1…
GO:0050660	flavin adenine dinucleotide binding	molecular_function	0.081407	0.9633	31	3203	207	27707	24	i4_LQ_Rweevil_c11709/f1p1/4172,i1_LQ_Rweevil_c22298/f1p2/1607,i1_HQ_Rweevil_c29789/f4p0/1677,i2_LQ_Rweevil_c110848/f1p6/2868,i1_LQ_Rweevil_c77146/f1p0/1467,i2_HQ_Rweevil_c12239/f2p0/2191,i2_LQ_Rweevil_c14600/f1p5/2069,i1_LQ_Rweevil_c50237/f1p0/1712,i2_LQ_Rweevil_c112919/f1p4/2752,i1_HQ_Rweevil_c19229/f3p0/1690,i4_LQ_Rweevil_c11912/f1p0/4360,i2_LQ_Rweevil_c37895/f1p1/2427,i11_LQ_Rweevil_c18/f1p0/1…	7	i3_LQ_Rweevil_c43158/f1p0/3009,i2_HQ_Rweevil_c17012/f15p1/2253,i2_LQ_Rweevil_c132564/f1p2/2835,i2_LQ_Rweevil_c20738/f1p5/2132,i2_LQ_Rweevil_c108717/f1p1/2292,i2_LQ_Rweevil_c86242/f1p75/2276,i2_HQ_Rweevil_c2161/f5p2/2434
GO:0016209	antioxidant activity	molecular_function	0.081421	0.9633	16	3203	97	27707	3	i4_HQ_Rweevil_c14498/f5p0/4424,i4_LQ_Rweevil_c2593/f1p65/4379,i4_HQ_Rweevil_c1343/f3p0/4493	13	i1_HQ_Rweevil_c12244/f3p6/1652,i0_LQ_Rweevil_c14258/f1p0/759,i1_LQ_Rweevil_c74253/f1p0/1813,i2_LQ_Rweevil_c77272/f1p3/2480,i2_LQ_Rweevil_c80810/f1p39/2718,i1_HQ_Rweevil_c790/f16p0/1607,i2_HQ_Rweevil_c12174/f3p38/2661,i2_LQ_Rweevil_c119152/f1p16/1930,i1_LQ_Rweevil_c147953/f1p13/1002,i1_LQ_Rweevil_c25468/f1p0/1970,i2_HQ_Rweevil_c11456/f3p9/2901,i2_HQ_Rweevil_c139139/f3p18/2108,i1_LQ_Rweevil_c56064/…
GO:0030234	enzyme regulator activity	molecular_function	0.081643	0.9633	57	3203	410	27707	23	i0_LQ_Rweevil_c52297/f1p0/776,i2_LQ_Rweevil_c86727/f1p3/2613,i3_LQ_Rweevil_c14869/f1p0/3047,i3_LQ_Rweevil_c8041/f1p0/3614,i2_HQ_Rweevil_c147837/f3p5/2250,i0_HQ_Rweevil_c61272/f2p1/408,i3_LQ_Rweevil_c26061/f1p0/3179,i4_LQ_Rweevil_c11938/f1p0/4777,i0_LQ_Rweevil_c26220/f1p0/412,i4_LQ_Rweevil_c4880/f1p1/4594,i1_LQ_Rweevil_c14992/f1p10/1123,i4_LQ_Rweevil_c2959/f1p3/4234,i2_LQ_Rweevil_c14795/f1p4/2163,…	34	i2_LQ_Rweevil_c65441/f1p2/2366,i1_LQ_Rweevil_c81808/f1p31/1629,i3_LQ_Rweevil_c28594/f1p0/3183,i0_LQ_Rweevil_c7383/f1p0/827,i3_HQ_Rweevil_c40346/f5p0/3129,i5_LQ_Rweevil_c3800/f1p0/5358,i4_HQ_Rweevil_c1421/f3p0/4115,i4_LQ_Rweevil_c9973/f1p2/4325,i3_LQ_Rweevil_c26468/f1p12/3522,i3_LQ_Rweevil_c3672/f1p15/3077,i7_LQ_Rweevil_c1023/f1p0/7115,i0_LQ_Rweevil_c47751/f3p0/849,i8_LQ_Rweevil_c42/f1p0/8938,i2_L…
GO:0072521	purine-containing compound metabolic process	biological_process	0.081827	0.9633	54	3203	390	27707	36	i2_LQ_Rweevil_c36370/f1p27/2340,i1_LQ_Rweevil_c23034/f1p5/1677,i4_HQ_Rweevil_c1158/f4p0/4431,i0_LQ_Rweevil_c37758/f1p0/987,i0_LQ_Rweevil_c26298/f1p0/337,i0_LQ_Rweevil_c91019/f2p0/884,i0_LQ_Rweevil_c23175/f1p7/817,i1_LQ_Rweevil_c34353/f1p0/1023,i2_LQ_Rweevil_c14630/f1p6/2131,i0_LQ_Rweevil_c33680/f1p0/515,i0_LQ_Rweevil_c30893/f1p0/641,i5_HQ_Rweevil_c557/f2p0/5530,i2_LQ_Rweevil_c82705/f1p23/2501,i1_…	18	i1_HQ_Rweevil_c96480/f7p0/1646,i2_LQ_Rweevil_c115091/f1p20/2356,i3_LQ_Rweevil_c15089/f1p1/3036,i1_LQ_Rweevil_c124727/f1p0/1327,i2_LQ_Rweevil_c104991/f1p4/2181,i2_LQ_Rweevil_c87523/f1p5/2582,i2_HQ_Rweevil_c60499/f2p18/3879,i1_LQ_Rweevil_c34927/f1p56/1047,i2_LQ_Rweevil_c108641/f1p22/2954,i3_HQ_Rweevil_c7602/f4p4/3449,i1_HQ_Rweevil_c121140/f49p0/1116,i6_LQ_Rweevil_c1261/f1p0/6409,i2_HQ_Rweevil_c7381…
GO:0008810	cellulase activity	molecular_function	0.082092	0.96372	5	3203	21	27707	0		5	i2_LQ_Rweevil_c29757/f1p13/2068,i2_LQ_Rweevil_c110094/f1p13/2480,i2_LQ_Rweevil_c69977/f1p13/2074,i2_LQ_Rweevil_c49875/f1p14/2095,i2_HQ_Rweevil_c47113/f2p13/2048
GO:0006270	DNA replication initiation	biological_process	0.082611	0.96711	22	3203	140	27707	11	i1_LQ_Rweevil_c40618/f1p0/1947,i2_HQ_Rweevil_c54169/f2p1/2233,i1_LQ_Rweevil_c71593/f1p0/1725,i4_LQ_Rweevil_c5278/f1p0/4368,i2_HQ_Rweevil_c147837/f3p5/2250,i1_HQ_Rweevil_c83822/f9p37/1119,i0_LQ_Rweevil_c56803/f1p2/844,i7_LQ_Rweevil_c645/f1p0/7459,i5_LQ_Rweevil_c4622/f1p0/5571,i0_LQ_Rweevil_c10200/f1p12/710,i3_LQ_Rweevil_c23687/f1p1/3657	11	i3_HQ_Rweevil_c29443/f3p0/3019,i4_HQ_Rweevil_c1377/f3p0/4259,i2_LQ_Rweevil_c44678/f1p2/2232,i2_LQ_Rweevil_c111760/f1p2/2381,i1_HQ_Rweevil_c1710/f8p0/1872,i1_HQ_Rweevil_c96747/f5p0/1770,i4_HQ_Rweevil_c657/f10p0/4274,i2_LQ_Rweevil_c18275/f1p3/2635,i2_LQ_Rweevil_c62366/f1p0/2241,i4_LQ_Rweevil_c7820/f1p0/4446,i2_LQ_Rweevil_c123280/f1p6/2106
GO:0001558	regulation of cell growth	biological_process	0.084159	0.97704	3	3203	10	27707	2	i0_LQ_Rweevil_c6690/f1p0/555,i0_HQ_Rweevil_c13223/f3p4/493	1	i4_LQ_Rweevil_c6211/f1p3/4739
GO:0005520	insulin-like growth factor binding	molecular_function	0.084159	0.97704	3	3203	10	27707	2	i0_LQ_Rweevil_c6690/f1p0/555,i0_HQ_Rweevil_c13223/f3p4/493	1	i4_LQ_Rweevil_c6211/f1p3/4739
GO:0016049	cell growth	biological_process	0.084159	0.97704	3	3203	10	27707	2	i0_LQ_Rweevil_c6690/f1p0/555,i0_HQ_Rweevil_c13223/f3p4/493	1	i4_LQ_Rweevil_c6211/f1p3/4739
GO:0008233	peptidase activity	molecular_function	0.085543	0.98805	167	3203	1312	27707	57	i2_LQ_Rweevil_c110118/f1p4/2989,i4_LQ_Rweevil_c10967/f1p0/4308,i2_LQ_Rweevil_c112660/f1p81/2618,i3_LQ_Rweevil_c17826/f1p12/3177,i3_LQ_Rweevil_c7081/f1p0/3325,i2_LQ_Rweevil_c12939/f1p13/2830,i3_LQ_Rweevil_c28634/f1p0/3315,i2_HQ_Rweevil_c10283/f4p0/2471,i3_LQ_Rweevil_c20544/f1p0/3254,i3_LQ_Rweevil_c36180/f1p117/3111,i4_LQ_Rweevil_c2195/f1p1/4821,i0_LQ_Rweevil_c10200/f1p12/710,i4_LQ_Rweevil_c8892/f1…	110	i8_LQ_Rweevil_c42/f1p0/8938,i1_HQ_Rweevil_c3295/f7p0/1542,i1_HQ_Rweevil_c12369/f7p0/1540,i1_LQ_Rweevil_c8362/f1p0/1788,i4_LQ_Rweevil_c8506/f1p0/4676,i2_HQ_Rweevil_c146831/f12p0/2513,i2_LQ_Rweevil_c84575/f1p17/2603,i1_HQ_Rweevil_c11069/f2p0/1800,i1_HQ_Rweevil_c19335/f5p0/1908,i0_LQ_Rweevil_c1872/f3p3/717,i3_LQ_Rweevil_c43190/f1p25/3041,i3_LQ_Rweevil_c26893/f1p0/3206,i4_LQ_Rweevil_c9293/f1p0/4538,i…
GO:0042802	identical protein binding	molecular_function	0.085579	0.98805	36	3203	246	27707	17	i2_LQ_Rweevil_c55224/f1p4/2604,i4_LQ_Rweevil_c8154/f1p0/4809,i4_LQ_Rweevil_c4177/f1p1/4420,i1_LQ_Rweevil_c48518/f1p0/1916,i3_LQ_Rweevil_c8534/f1p5/3661,i4_LQ_Rweevil_c5286/f1p9/4611,i1_LQ_Rweevil_c14992/f1p10/1123,i3_LQ_Rweevil_c25218/f1p100/3628,i4_HQ_Rweevil_c1899/f2p3/4252,i1_LQ_Rweevil_c67077/f1p0/1989,i5_LQ_Rweevil_c1823/f1p0/5203,i3_LQ_Rweevil_c6953/f1p0/3151,i0_LQ_Rweevil_c52297/f1p0/776,i…	19	i2_LQ_Rweevil_c79018/f1p1/2158,i2_HQ_Rweevil_c11146/f2p0/2776,i3_HQ_Rweevil_c31743/f11p0/3123,i2_LQ_Rweevil_c43263/f2p0/2838,i2_LQ_Rweevil_c43754/f1p0/2994,i3_HQ_Rweevil_c1520/f5p5/3162,i1_LQ_Rweevil_c43311/f1p0/1185,i2_LQ_Rweevil_c31521/f1p17/2037,i3_HQ_Rweevil_c2371/f3p4/3348,i3_LQ_Rweevil_c27717/f1p0/3741,i5_LQ_Rweevil_c4662/f1p0/5091,i3_LQ_Rweevil_c28594/f1p0/3183,i2_HQ_Rweevil_c139473/f2p8/2…
GO:0050776	regulation of immune response	biological_process	0.086221	0.99272	5	3203	21	27707	4	i1_LQ_Rweevil_c10445/f1p0/1939,i2_LQ_Rweevil_c24541/f1p3/2342,i1_LQ_Rweevil_c12972/f1p60/1762,i2_LQ_Rweevil_c59920/f1p1/2934	1	i3_LQ_Rweevil_c19966/f1p0/3112
GO:0070838	divalent metal ion transport	biological_process	0.086483	0.99301	8	3203	40	27707	6	i1_LQ_Rweevil_c8453/f1p2/1955,i4_LQ_Rweevil_c4591/f1p0/4277,i6_LQ_Rweevil_c1820/f1p2/6291,i6_LQ_Rweevil_c392/f1p0/6215,i5_LQ_Rweevil_c3209/f1p0/5482,i1_LQ_Rweevil_c8309/f1p0/1805	2	i2_LQ_Rweevil_c112147/f1p2/2308,i2_HQ_Rweevil_c51491/f15p5/2116
GO:0044767	single-organism developmental process	biological_process	0.088562	1	57	3203	414	27707	27	i5_LQ_Rweevil_c1531/f1p3/5630,i1_LQ_Rweevil_c12419/f1p1/1724,i3_LQ_Rweevil_c27338/f1p0/3657,i4_LQ_Rweevil_c6428/f1p4/4685,i2_LQ_Rweevil_c94128/f1p2/2098,i8_LQ_Rweevil_c244/f1p0/8473,i0_LQ_Rweevil_c57882/f1p0/563,i1_LQ_Rweevil_c50155/f1p1/1754,i1_HQ_Rweevil_c35180/f2p0/1511,i2_LQ_Rweevil_c84021/f1p2/2607,i5_HQ_Rweevil_c276/f4p0/5541,i2_HQ_Rweevil_c147351/f6p10/2079,i3_HQ_Rweevil_c5275/f6p0/3254,i5…	30	i5_LQ_Rweevil_c2643/f1p2/5174,i4_LQ_Rweevil_c13321/f1p11/4042,i2_LQ_Rweevil_c8368/f1p19/2381,i5_LQ_Rweevil_c1020/f1p0/5164,i1_LQ_Rweevil_c45192/f1p0/1917,i2_LQ_Rweevil_c39657/f1p0/2134,i9_HQ_Rweevil_c4/f2p0/9144,i2_HQ_Rweevil_c34740/f2p1/2209,i4_LQ_Rweevil_c7155/f1p0/4814,i2_LQ_Rweevil_c49592/f1p0/2033,i1_HQ_Rweevil_c19335/f5p0/1908,i7_LQ_Rweevil_c114/f1p0/7273,i1_LQ_Rweevil_c2608/f1p2/1548,i2_LQ…
GO:0044262	cellular carbohydrate metabolic process	biological_process	0.089578	1	18	3203	112	27707	7	i2_LQ_Rweevil_c9947/f1p8/2889,i2_LQ_Rweevil_c84177/f1p13/3126,i3_LQ_Rweevil_c11128/f1p4/3153,i3_HQ_Rweevil_c17946/f2p9/3378,i4_LQ_Rweevil_c5412/f1p0/4158,i1_LQ_Rweevil_c31482/f1p3/1487,i2_HQ_Rweevil_c34506/f2p1/2172	11	i2_LQ_Rweevil_c110094/f1p13/2480,i2_LQ_Rweevil_c49875/f1p14/2095,i1_LQ_Rweevil_c91074/f1p0/1127,i2_LQ_Rweevil_c29757/f1p13/2068,i2_LQ_Rweevil_c69977/f1p13/2074,i2_HQ_Rweevil_c99536/f30p7/2798,i7_LQ_Rweevil_c453/f1p0/7423,i3_LQ_Rweevil_c27969/f1p0/3702,i2_HQ_Rweevil_c47113/f2p13/2048,i1_LQ_Rweevil_c28133/f1p0/1976,i1_LQ_Rweevil_c16810/f1p0/1069
GO:0008484	sulfuric ester hydrolase activity	molecular_function	0.089939	1	9	3203	47	27707	3	i3_LQ_Rweevil_c28610/f1p0/3071,i1_HQ_Rweevil_c23366/f2p0/1659,i3_LQ_Rweevil_c5115/f1p1/3548	6	i2_LQ_Rweevil_c21146/f1p2/2685,i2_HQ_Rweevil_c21513/f2p2/2294,i3_LQ_Rweevil_c5892/f1p2/3893,i3_LQ_Rweevil_c9661/f1p0/3273,i1_HQ_Rweevil_c2469/f10p62/1867,i2_LQ_Rweevil_c4756/f3p0/2169
GO:0006508	proteolysis	biological_process	0.090159	1	181	3203	1426	27707	65	i2_LQ_Rweevil_c82366/f1p8/2482,i0_LQ_Rweevil_c13562/f1p0/955,i2_LQ_Rweevil_c105964/f1p2/2398,i4_LQ_Rweevil_c11938/f1p0/4777,i2_LQ_Rweevil_c103762/f1p0/2407,i2_LQ_Rweevil_c18444/f1p1/3000,i7_LQ_Rweevil_c551/f1p0/7327,i2_HQ_Rweevil_c126242/f14p3/2387,i3_HQ_Rweevil_c1991/f2p0/3328,i2_HQ_Rweevil_c36513/f4p1/2797,i3_LQ_Rweevil_c13466/f1p25/3434,i1_HQ_Rweevil_c7099/f5p0/1390,i1_LQ_Rweevil_c51779/f1p0/1…	116	i5_HQ_Rweevil_c5312/f4p0/5132,i1_LQ_Rweevil_c30339/f1p0/1320,i2_LQ_Rweevil_c61755/f1p1/2633,i4_LQ_Rweevil_c9033/f1p1/4584,i3_HQ_Rweevil_c7602/f4p4/3449,i0_HQ_Rweevil_c162/f18p0/926,i1_LQ_Rweevil_c27449/f1p12/1899,i2_HQ_Rweevil_c118237/f3p5/2068,i2_LQ_Rweevil_c29591/f1p2/2046,i1_LQ_Rweevil_c71682/f1p0/1951,i2_LQ_Rweevil_c84869/f1p68/2342,i5_LQ_Rweevil_c1155/f1p0/5261,i2_LQ_Rweevil_c77938/f1p8/2310…
GO:0006457	protein folding	biological_process	0.09056	1	27	3203	180	27707	5	i4_LQ_Rweevil_c3020/f1p3/4567,i2_LQ_Rweevil_c63101/f1p6/2132,i1_LQ_Rweevil_c14992/f1p10/1123,i0_LQ_Rweevil_c52297/f1p0/776,i2_LQ_Rweevil_c55224/f1p4/2604	22	i3_LQ_Rweevil_c28594/f1p0/3183,i2_LQ_Rweevil_c23450/f1p5/2669,i2_LQ_Rweevil_c44678/f1p2/2232,i3_LQ_Rweevil_c12550/f1p0/3503,i0_HQ_Rweevil_c71525/f43p0/747,i2_LQ_Rweevil_c43754/f1p0/2994,i1_LQ_Rweevil_c121769/f1p6/1602,i2_LQ_Rweevil_c18275/f1p3/2635,i1_HQ_Rweevil_c96747/f5p0/1770,i2_LQ_Rweevil_c79018/f1p1/2158,i2_LQ_Rweevil_c82722/f1p0/2507,i4_LQ_Rweevil_c3647/f1p11/4174,i2_LQ_Rweevil_c85150/f1p6/…
GO:0008234	cysteine-type peptidase activity	molecular_function	0.091019	1	27	3203	179	27707	14	i4_LQ_Rweevil_c11938/f1p0/4777,i3_LQ_Rweevil_c26061/f1p0/3179,i2_LQ_Rweevil_c35325/f1p0/2677,i2_LQ_Rweevil_c112660/f1p81/2618,i4_HQ_Rweevil_c1584/f2p0/4697,i4_LQ_Rweevil_c2195/f1p1/4821,i2_LQ_Rweevil_c110118/f1p4/2989,i4_LQ_Rweevil_c11311/f1p0/4458,i4_LQ_Rweevil_c8892/f1p11/4356,i4_LQ_Rweevil_c10967/f1p0/4308,i4_LQ_Rweevil_c4880/f1p1/4594,i2_LQ_Rweevil_c18444/f1p1/3000,i2_LQ_Rweevil_c109368/f1p88…	13	i4_LQ_Rweevil_c9973/f1p2/4325,i2_LQ_Rweevil_c88611/f1p1/2139,i2_LQ_Rweevil_c142681/f1p1/2102,i4_LQ_Rweevil_c9293/f1p0/4538,i1_HQ_Rweevil_c84508/f5p0/1096,i2_LQ_Rweevil_c59462/f1p1/2443,i5_HQ_Rweevil_c5312/f4p0/5132,i2_LQ_Rweevil_c20549/f1p1/2100,i3_LQ_Rweevil_c9544/f1p47/3196,i2_HQ_Rweevil_c99634/f29p3/2185,i1_LQ_Rweevil_c80501/f1p0/1929,i1_HQ_Rweevil_c918/f26p0/1844,i1_HQ_Rweevil_c11069/f2p0/1800
GO:0009074	aromatic amino acid family catabolic process	biological_process	0.091485	1	7	3203	34	27707	5	i1_LQ_Rweevil_c6712/f1p0/1175,i4_LQ_Rweevil_c5997/f1p1/4781,i2_LQ_Rweevil_c25225/f1p8/2143,i1_LQ_Rweevil_c11458/f1p0/1570,i3_LQ_Rweevil_c6668/f1p0/3161	2	i0_LQ_Rweevil_c60066/f1p0/893,i2_LQ_Rweevil_c22765/f1p28/2229
GO:0006098	pentose-phosphate shunt	biological_process	0.09266	1	3	3203	10	27707	2	i1_LQ_Rweevil_c89505/f1p0/1034,i2_LQ_Rweevil_c39475/f1p2/2722	1	i1_HQ_Rweevil_c52526/f2p0/1825
GO:0019682	glyceraldehyde-3-phosphate metabolic process	biological_process	0.09266	1	3	3203	10	27707	2	i2_LQ_Rweevil_c39475/f1p2/2722,i1_LQ_Rweevil_c89505/f1p0/1034	1	i1_HQ_Rweevil_c52526/f2p0/1825
GO:0051156	glucose 6-phosphate metabolic process	biological_process	0.09266	1	3	3203	10	27707	2	i2_LQ_Rweevil_c39475/f1p2/2722,i1_LQ_Rweevil_c89505/f1p0/1034	1	i1_HQ_Rweevil_c52526/f2p0/1825
GO:0022610	biological adhesion	biological_process	0.093191	1	51	3203	364	27707	22	i2_HQ_Rweevil_c60750/f2p19/2949,i1_LQ_Rweevil_c50155/f1p1/1754,i9_LQ_Rweevil_c65/f1p0/9271,i6_LQ_Rweevil_c218/f1p0/6339,i2_LQ_Rweevil_c45490/f1p24/3131,i1_LQ_Rweevil_c67604/f1p0/1751,i2_HQ_Rweevil_c56536/f3p4/2845,i2_HQ_Rweevil_c147837/f3p5/2250,i5_HQ_Rweevil_c557/f2p0/5530,i2_LQ_Rweevil_c44954/f1p3/2376,i2_LQ_Rweevil_c58365/f1p10/1997,i1_LQ_Rweevil_c26511/f1p0/1714,i3_LQ_Rweevil_c35995/f1p0/3092…	29	i2_LQ_Rweevil_c80275/f1p2/2521,i3_HQ_Rweevil_c40793/f26p0/3200,i3_LQ_Rweevil_c5647/f1p0/3916,i11_LQ_Rweevil_c66/f1p0/11519,i6_LQ_Rweevil_c2210/f1p0/6062,i7_LQ_Rweevil_c114/f1p0/7273,i2_LQ_Rweevil_c38010/f1p4/2512,i4_LQ_Rweevil_c3536/f1p0/4156,i1_HQ_Rweevil_c84508/f5p0/1096,i3_HQ_Rweevil_c40313/f44p0/3467,i3_LQ_Rweevil_c19841/f1p0/3080,i2_LQ_Rweevil_c65441/f1p2/2366,i2_HQ_Rweevil_c139473/f2p8/2032…
GO:0007338	single fertilization	biological_process	0.09374	1	7	3203	34	27707	4	i3_LQ_Rweevil_c20294/f1p0/3945,i2_LQ_Rweevil_c135544/f1p43/2975,i5_LQ_Rweevil_c4055/f1p6/5925,i5_LQ_Rweevil_c1571/f1p32/5873	3	i4_LQ_Rweevil_c9987/f1p0/4159,i3_LQ_Rweevil_c13532/f1p0/3124,i4_LQ_Rweevil_c3027/f1p0/4655
GO:0009566	fertilization	biological_process	0.09374	1	7	3203	34	27707	4	i5_LQ_Rweevil_c1571/f1p32/5873,i5_LQ_Rweevil_c4055/f1p6/5925,i2_LQ_Rweevil_c135544/f1p43/2975,i3_LQ_Rweevil_c20294/f1p0/3945	3	i4_LQ_Rweevil_c3027/f1p0/4655,i3_LQ_Rweevil_c13532/f1p0/3124,i4_LQ_Rweevil_c9987/f1p0/4159
GO:0006848	pyruvate transport	biological_process	0.094687	1	2	3203	5	27707	2	i0_HQ_Rweevil_c989/f12p0/562,i4_LQ_Rweevil_c12015/f1p0/4394	0
GO:0006850	mitochondrial pyruvate transport	biological_process	0.094687	1	2	3203	5	27707	2	i4_LQ_Rweevil_c12015/f1p0/4394,i0_HQ_Rweevil_c989/f12p0/562	0
GO:0035821	modification of morphology or physiology of other organism	biological_process	0.095182	1	11	3203	62	27707	5	i2_HQ_Rweevil_c60720/f3p2/2422,i1_LQ_Rweevil_c67077/f1p0/1989,i1_LQ_Rweevil_c50155/f1p1/1754,i3_HQ_Rweevil_c5040/f2p0/3247,i2_LQ_Rweevil_c55603/f1p2/2956	6	i2_HQ_Rweevil_c118314/f2p1/2060,i2_LQ_Rweevil_c57857/f1p4/2303,i2_LQ_Rweevil_c63268/f1p4/2227,i0_HQ_Rweevil_c881/f7p5/919,i3_LQ_Rweevil_c5174/f1p6/3852,i3_LQ_Rweevil_c5647/f1p0/3916
GO:0048583	regulation of response to stimulus	biological_process	0.095709	1	51	3203	365	27707	28	i2_LQ_Rweevil_c108502/f1p2/2897,i3_LQ_Rweevil_c28121/f1p0/3628,i4_HQ_Rweevil_c14081/f3p0/4198,i2_LQ_Rweevil_c109811/f1p22/2985,i2_LQ_Rweevil_c13738/f1p11/2653,i4_LQ_Rweevil_c2959/f1p3/4234,i1_LQ_Rweevil_c12972/f1p60/1762,i6_LQ_Rweevil_c743/f1p0/6626,i1_LQ_Rweevil_c30819/f1p9/1646,i2_LQ_Rweevil_c98680/f1p11/2728,i2_LQ_Rweevil_c5681/f1p7/2655,i3_HQ_Rweevil_c40635/f18p0/3497,i2_LQ_Rweevil_c3286/f1p3…	23	i4_HQ_Rweevil_c1153/f4p0/4280,i4_LQ_Rweevil_c12942/f1p4/4120,i2_LQ_Rweevil_c15036/f1p1/2042,i2_LQ_Rweevil_c110667/f1p2/2742,i3_LQ_Rweevil_c19966/f1p0/3112,i2_LQ_Rweevil_c57749/f1p1/2447,i4_LQ_Rweevil_c10297/f1p3/4685,i2_LQ_Rweevil_c41852/f1p3/3616,i1_LQ_Rweevil_c77191/f1p3/1206,i2_LQ_Rweevil_c115222/f1p4/2301,i1_LQ_Rweevil_c51459/f1p0/1511,i6_LQ_Rweevil_c1689/f1p0/6908,i4_HQ_Rweevil_c1421/f3p0/41…
GO:0050801	ion homeostasis	biological_process	0.096106	1	18	3203	116	27707	16	i2_LQ_Rweevil_c86727/f1p3/2613,i0_LQ_Rweevil_c9463/f1p0/919,i1_LQ_Rweevil_c35031/f1p0/1055,i0_LQ_Rweevil_c56352/f1p0/985,i6_LQ_Rweevil_c1913/f1p0/6208,i0_LQ_Rweevil_c38022/f1p0/855,i0_LQ_Rweevil_c50902/f1p0/830,i2_LQ_Rweevil_c56369/f1p8/2079,i2_LQ_Rweevil_c13608/f1p0/2291,i1_LQ_Rweevil_c68931/f1p5/1173,i2_LQ_Rweevil_c38847/f1p23/2427,i4_HQ_Rweevil_c1587/f2p0/4333,i2_HQ_Rweevil_c81693/f2p26/2254,i…	2	i3_LQ_Rweevil_c7034/f2p0/3847,i0_HQ_Rweevil_c1204/f6p3/814
GO:0055080	cation homeostasis	biological_process	0.096106	1	18	3203	116	27707	16	i0_LQ_Rweevil_c56352/f1p0/985,i0_LQ_Rweevil_c9463/f1p0/919,i1_LQ_Rweevil_c35031/f1p0/1055,i2_LQ_Rweevil_c86727/f1p3/2613,i0_LQ_Rweevil_c50902/f1p0/830,i6_LQ_Rweevil_c1913/f1p0/6208,i0_LQ_Rweevil_c38022/f1p0/855,i4_HQ_Rweevil_c1587/f2p0/4333,i2_LQ_Rweevil_c38847/f1p23/2427,i1_LQ_Rweevil_c68931/f1p5/1173,i2_LQ_Rweevil_c56369/f1p8/2079,i2_LQ_Rweevil_c13608/f1p0/2291,i1_LQ_Rweevil_c90215/f1p0/1106,i1…	2	i3_LQ_Rweevil_c7034/f2p0/3847,i0_HQ_Rweevil_c1204/f6p3/814
GO:0098771	inorganic ion homeostasis	biological_process	0.096106	1	18	3203	116	27707	16	i2_LQ_Rweevil_c86727/f1p3/2613,i1_LQ_Rweevil_c35031/f1p0/1055,i0_LQ_Rweevil_c56352/f1p0/985,i0_LQ_Rweevil_c9463/f1p0/919,i0_LQ_Rweevil_c38022/f1p0/855,i6_LQ_Rweevil_c1913/f1p0/6208,i0_LQ_Rweevil_c50902/f1p0/830,i2_LQ_Rweevil_c56369/f1p8/2079,i2_LQ_Rweevil_c13608/f1p0/2291,i1_LQ_Rweevil_c68931/f1p5/1173,i2_LQ_Rweevil_c38847/f1p23/2427,i4_HQ_Rweevil_c1587/f2p0/4333,i2_HQ_Rweevil_c81693/f2p26/2254,i…	2	i3_LQ_Rweevil_c7034/f2p0/3847,i0_HQ_Rweevil_c1204/f6p3/814
GO:0050661	NADP binding	molecular_function	0.097081	1	8	3203	41	27707	5	i11_LQ_Rweevil_c18/f1p0/11715,i4_LQ_Rweevil_c12777/f1p0/4036,i1_HQ_Rweevil_c120977/f2p0/1301,i1_HQ_Rweevil_c25511/f2p0/1299,i2_HQ_Rweevil_c23591/f3p9/2681	3	i3_HQ_Rweevil_c1440/f7p0/3196,i3_LQ_Rweevil_c25589/f1p0/3141,i1_LQ_Rweevil_c77730/f1p11/1809
GO:0009119	ribonucleoside metabolic process	biological_process	0.098455	1	46	3203	333	27707	31	i0_LQ_Rweevil_c33680/f1p0/515,i2_LQ_Rweevil_c14630/f1p6/2131,i1_LQ_Rweevil_c34353/f1p0/1023,i2_LQ_Rweevil_c82705/f1p23/2501,i5_HQ_Rweevil_c557/f2p0/5530,i4_HQ_Rweevil_c1158/f4p0/4431,i0_LQ_Rweevil_c37758/f1p0/987,i0_LQ_Rweevil_c91019/f2p0/884,i0_LQ_Rweevil_c26298/f1p0/337,i2_LQ_Rweevil_c36370/f1p27/2340,i1_LQ_Rweevil_c23034/f1p5/1677,i0_LQ_Rweevil_c23175/f1p7/817,i2_LQ_Rweevil_c8751/f1p23/3093,i2…	15	i1_LQ_Rweevil_c34927/f1p56/1047,i2_LQ_Rweevil_c104991/f1p4/2181,i3_LQ_Rweevil_c15089/f1p1/3036,i2_HQ_Rweevil_c60499/f2p18/3879,i2_LQ_Rweevil_c87523/f1p5/2582,i2_LQ_Rweevil_c108641/f1p22/2954,i1_HQ_Rweevil_c121140/f49p0/1116,i1_HQ_Rweevil_c96480/f7p0/1646,i3_LQ_Rweevil_c7589/f1p21/3380,i2_LQ_Rweevil_c24555/f1p5/2795,i2_LQ_Rweevil_c85130/f1p0/2686,i2_LQ_Rweevil_c71487/f1p3/2094,i2_HQ_Rweevil_c73812…
GO:0016010	dystrophin-associated glycoprotein complex	cellular_component	0.09882	1	5	3203	22	27707	0		5	i4_HQ_Rweevil_c630/f11p0/4888,i4_HQ_Rweevil_c744/f9p0/4431,i4_LQ_Rweevil_c8501/f1p0/4626,i5_LQ_Rweevil_c5160/f1p0/5009,i4_LQ_Rweevil_c5122/f1p0/4699
GO:0016714	oxidoreductase activity, acting on paired donors, with incorporation or reduction of molecular oxygen, reduced pteridine as one donor, and incorporation of one atom of oxygen	molecular_function	0.10003	1	3	3203	10	27707	1	i1_LQ_Rweevil_c41260/f1p0/1995	2	i2_HQ_Rweevil_c147993/f129p15/2433,i4_LQ_Rweevil_c4993/f1p0/4393
GO:0010942	positive regulation of cell death	biological_process	0.10025	1	4	3203	16	27707	2	i2_HQ_Rweevil_c60720/f3p2/2422,i1_LQ_Rweevil_c22697/f1p0/1478	2	i1_HQ_Rweevil_c37687/f25p0/1373,i0_LQ_Rweevil_c50503/f1p0/803
GO:0043065	positive regulation of apoptotic process	biological_process	0.10025	1	4	3203	16	27707	2	i1_LQ_Rweevil_c22697/f1p0/1478,i2_HQ_Rweevil_c60720/f3p2/2422	2	i0_LQ_Rweevil_c50503/f1p0/803,i1_HQ_Rweevil_c37687/f25p0/1373
GO:0043068	positive regulation of programmed cell death	biological_process	0.10025	1	4	3203	16	27707	2	i1_LQ_Rweevil_c22697/f1p0/1478,i2_HQ_Rweevil_c60720/f3p2/2422	2	i1_HQ_Rweevil_c37687/f25p0/1373,i0_LQ_Rweevil_c50503/f1p0/803
GO:0004869	cysteine-type endopeptidase inhibitor activity	molecular_function	0.10137	1	9	3203	48	27707	7	i4_HQ_Rweevil_c1584/f2p0/4697,i4_LQ_Rweevil_c4880/f1p1/4594,i3_LQ_Rweevil_c8041/f1p0/3614,i3_LQ_Rweevil_c26061/f1p0/3179,i4_LQ_Rweevil_c11938/f1p0/4777,i4_LQ_Rweevil_c8892/f1p11/4356,i4_LQ_Rweevil_c2195/f1p1/4821	2	i4_LQ_Rweevil_c9973/f1p2/4325,i4_LQ_Rweevil_c9293/f1p0/4538
GO:0005262	calcium channel activity	molecular_function	0.10169	1	13	3203	77	27707	10	i6_LQ_Rweevil_c1820/f1p2/6291,i6_LQ_Rweevil_c392/f1p0/6215,i0_LQ_Rweevil_c10200/f1p12/710,i1_LQ_Rweevil_c30819/f1p9/1646,i5_LQ_Rweevil_c3209/f1p0/5482,i1_LQ_Rweevil_c8309/f1p0/1805,i1_LQ_Rweevil_c8453/f1p2/1955,i2_LQ_Rweevil_c56369/f1p8/2079,i4_HQ_Rweevil_c1587/f2p0/4333,i4_LQ_Rweevil_c4591/f1p0/4277	3	i2_HQ_Rweevil_c51491/f15p5/2116,i3_LQ_Rweevil_c7034/f2p0/3847,i0_HQ_Rweevil_c1204/f6p3/814
GO:0048878	chemical homeostasis	biological_process	0.10208	1	18	3203	117	27707	16	i2_LQ_Rweevil_c38847/f1p23/2427,i4_HQ_Rweevil_c1587/f2p0/4333,i2_LQ_Rweevil_c13608/f1p0/2291,i2_LQ_Rweevil_c56369/f1p8/2079,i1_LQ_Rweevil_c68931/f1p5/1173,i1_LQ_Rweevil_c30819/f1p9/1646,i1_LQ_Rweevil_c90215/f1p0/1106,i2_HQ_Rweevil_c81693/f2p26/2254,i0_LQ_Rweevil_c10200/f1p12/710,i2_LQ_Rweevil_c86727/f1p3/2613,i1_LQ_Rweevil_c35031/f1p0/1055,i0_LQ_Rweevil_c56352/f1p0/985,i0_LQ_Rweevil_c9463/f1p0/91…	2	i0_HQ_Rweevil_c1204/f6p3/814,i3_LQ_Rweevil_c7034/f2p0/3847
GO:0008239	dipeptidyl-peptidase activity	molecular_function	0.10221	1	4	3203	16	27707	2	i2_LQ_Rweevil_c10446/f1p1/2544,i2_LQ_Rweevil_c110995/f1p2/2222	2	i2_LQ_Rweevil_c45069/f1p1/2538,i0_LQ_Rweevil_c1872/f3p3/717
GO:0000003	reproduction	biological_process	0.10226	1	32	3203	221	27707	18	i5_LQ_Rweevil_c4419/f1p0/5199,i2_LQ_Rweevil_c135544/f1p43/2975,i8_LQ_Rweevil_c244/f1p0/8473,i2_LQ_Rweevil_c94128/f1p2/2098,i0_LQ_Rweevil_c57882/f1p0/563,i1_LQ_Rweevil_c13623/f1p4/1589,i5_LQ_Rweevil_c1571/f1p32/5873,i5_HQ_Rweevil_c276/f4p0/5541,i3_LQ_Rweevil_c20294/f1p0/3945,i4_LQ_Rweevil_c7825/f1p6/4210,i3_LQ_Rweevil_c22669/f1p0/3277,i2_LQ_Rweevil_c82033/f1p1/2682,i4_LQ_Rweevil_c8635/f1p11/4756,i…	14	i5_LQ_Rweevil_c1020/f1p0/5164,i2_LQ_Rweevil_c134359/f1p3/2794,i2_LQ_Rweevil_c37114/f1p136/2538,i4_LQ_Rweevil_c3027/f1p0/4655,i2_HQ_Rweevil_c1904/f10p3/2685,i1_HQ_Rweevil_c19335/f5p0/1908,i3_LQ_Rweevil_c9661/f1p0/3273,i4_LQ_Rweevil_c9987/f1p0/4159,i2_HQ_Rweevil_c61171/f2p0/2256,i2_HQ_Rweevil_c41479/f2p4/2876,i1_LQ_Rweevil_c31604/f1p0/1328,i3_LQ_Rweevil_c13532/f1p0/3124,i2_HQ_Rweevil_c39443/f3p1/23…
GO:0032879	regulation of localization	biological_process	0.10239	1	12	3203	70	27707	5	i2_LQ_Rweevil_c55224/f1p4/2604,i1_LQ_Rweevil_c50155/f1p1/1754,i1_LQ_Rweevil_c12972/f1p60/1762,i1_LQ_Rweevil_c67077/f1p0/1989,i1_LQ_Rweevil_c10445/f1p0/1939	7	i11_LQ_Rweevil_c12/f1p0/11139,i7_LQ_Rweevil_c114/f1p0/7273,i3_HQ_Rweevil_c40793/f26p0/3200,i3_LQ_Rweevil_c19966/f1p0/3112,i0_LQ_Rweevil_c15452/f1p0/544,i2_LQ_Rweevil_c58118/f1p0/2812,i0_LQ_Rweevil_c22873/f1p0/943
GO:0032507	maintenance of protein location in cell	biological_process	0.10285	1	5	3203	22	27707	1	i2_LQ_Rweevil_c58365/f1p10/1997	4	i1_HQ_Rweevil_c64473/f5p27/1152,i4_HQ_Rweevil_c630/f11p0/4888,i4_LQ_Rweevil_c9939/f1p2/5014,i5_LQ_Rweevil_c5160/f1p0/5009
GO:0045185	maintenance of protein location	biological_process	0.10285	1	5	3203	22	27707	1	i2_LQ_Rweevil_c58365/f1p10/1997	4	i1_HQ_Rweevil_c64473/f5p27/1152,i4_HQ_Rweevil_c630/f11p0/4888,i4_LQ_Rweevil_c9939/f1p2/5014,i5_LQ_Rweevil_c5160/f1p0/5009
GO:0051651	maintenance of location in cell	biological_process	0.10285	1	5	3203	22	27707	1	i2_LQ_Rweevil_c58365/f1p10/1997	4	i4_HQ_Rweevil_c630/f11p0/4888,i4_LQ_Rweevil_c9939/f1p2/5014,i5_LQ_Rweevil_c5160/f1p0/5009,i1_HQ_Rweevil_c64473/f5p27/1152
GO:0006020	inositol metabolic process	biological_process	0.10321	1	4	3203	16	27707	0		4	i1_LQ_Rweevil_c91074/f1p0/1127,i3_LQ_Rweevil_c27969/f1p0/3702,i1_LQ_Rweevil_c16810/f1p0/1069,i7_LQ_Rweevil_c453/f1p0/7423
GO:0098797	plasma membrane protein complex	cellular_component	0.10328	1	15	3203	92	27707	7	i1_LQ_Rweevil_c8453/f1p2/1955,i2_HQ_Rweevil_c34506/f2p1/2172,i4_LQ_Rweevil_c4591/f1p0/4277,i6_LQ_Rweevil_c392/f1p0/6215,i6_LQ_Rweevil_c1820/f1p2/6291,i1_LQ_Rweevil_c8309/f1p0/1805,i5_LQ_Rweevil_c3209/f1p0/5482	8	i5_LQ_Rweevil_c5160/f1p0/5009,i6_LQ_Rweevil_c1261/f1p0/6409,i4_LQ_Rweevil_c5122/f1p0/4699,i6_LQ_Rweevil_c822/f1p0/6346,i2_HQ_Rweevil_c51491/f15p5/2116,i4_LQ_Rweevil_c8501/f1p0/4626,i4_HQ_Rweevil_c630/f11p0/4888,i4_HQ_Rweevil_c744/f9p0/4431
GO:0015232	heme transporter activity	molecular_function	0.106	1	2	3203	5	27707	0		2	i2_HQ_Rweevil_c21542/f2p1/2729,i2_HQ_Rweevil_c2340/f7p1/2708
GO:0015886	heme transport	biological_process	0.106	1	2	3203	5	27707	0		2	i2_HQ_Rweevil_c2340/f7p1/2708,i2_HQ_Rweevil_c21542/f2p1/2729
GO:1901678	iron coordination entity transport	biological_process	0.106	1	2	3203	5	27707	0		2	i2_HQ_Rweevil_c21542/f2p1/2729,i2_HQ_Rweevil_c2340/f7p1/2708
GO:0040008	regulation of growth	biological_process	0.10811	1	3	3203	11	27707	2	i0_LQ_Rweevil_c6690/f1p0/555,i0_HQ_Rweevil_c13223/f3p4/493	1	i4_LQ_Rweevil_c6211/f1p3/4739
GO:0044743	intracellular protein transmembrane import	biological_process	0.10838	1	7	3203	36	27707	0		7	i2_LQ_Rweevil_c85150/f1p6/2680,i2_LQ_Rweevil_c82722/f1p0/2507,i2_LQ_Rweevil_c23450/f1p5/2669,i6_LQ_Rweevil_c2349/f1p2/6015,i2_LQ_Rweevil_c22287/f1p4/2889,i6_LQ_Rweevil_c2231/f1p0/6028,i2_LQ_Rweevil_c116774/f1p1/2668
GO:0065002	intracellular protein transmembrane transport	biological_process	0.10838	1	7	3203	36	27707	0		7	i6_LQ_Rweevil_c2231/f1p0/6028,i2_LQ_Rweevil_c116774/f1p1/2668,i2_LQ_Rweevil_c22287/f1p4/2889,i2_LQ_Rweevil_c85150/f1p6/2680,i2_LQ_Rweevil_c82722/f1p0/2507,i2_LQ_Rweevil_c23450/f1p5/2669,i6_LQ_Rweevil_c2349/f1p2/6015
GO:0004180	carboxypeptidase activity	molecular_function	0.11227	1	13	3203	78	27707	3	i5_LQ_Rweevil_c1817/f1p2/5617,i1_HQ_Rweevil_c7099/f5p0/1390,i1_LQ_Rweevil_c59990/f1p12/1974	10	i1_LQ_Rweevil_c13950/f2p0/1618,i1_HQ_Rweevil_c17174/f15p1/1971,i2_HQ_Rweevil_c50782/f36p6/2498,i1_LQ_Rweevil_c52819/f1p0/1881,i1_HQ_Rweevil_c2191/f8p7/1622,i2_HQ_Rweevil_c13155/f7p6/2368,i1_LQ_Rweevil_c77849/f1p1/1591,i3_LQ_Rweevil_c22037/f1p0/3152,i4_LQ_Rweevil_c11071/f1p0/4609,i1_LQ_Rweevil_c61778/f1p0/1829
GO:0016153	urocanate hydratase activity	molecular_function	0.11315	1	1	3203	1	27707	0		1	i1_LQ_Rweevil_c5140/f4p8/1500
GO:0030545	receptor regulator activity	molecular_function	0.114	1	1	3203	1	27707	1	i1_LQ_Rweevil_c28545/f1p5/1657	0
GO:0030547	receptor inhibitor activity	molecular_function	0.114	1	1	3203	1	27707	1	i1_LQ_Rweevil_c28545/f1p5/1657	0
GO:0030548	acetylcholine receptor regulator activity	molecular_function	0.114	1	1	3203	1	27707	1	i1_LQ_Rweevil_c28545/f1p5/1657	0
GO:0030550	acetylcholine receptor inhibitor activity	molecular_function	0.114	1	1	3203	1	27707	1	i1_LQ_Rweevil_c28545/f1p5/1657	0
GO:0031344	regulation of cell projection organization	biological_process	0.11414	1	1	3203	1	27707	1	i1_LQ_Rweevil_c6761/f1p9/1674	0
GO:0060491	regulation of cell projection assembly	biological_process	0.11414	1	1	3203	1	27707	1	i1_LQ_Rweevil_c6761/f1p9/1674	0
GO:1902208	regulation of bacterial-type flagellum assembly	biological_process	0.11414	1	1	3203	1	27707	1	i1_LQ_Rweevil_c6761/f1p9/1674	0
GO:0009291	unidirectional conjugation	biological_process	0.11514	1	1	3203	1	27707	1	i1_LQ_Rweevil_c82502/f1p0/1861	0
GO:0009292	genetic transfer	biological_process	0.11514	1	1	3203	1	27707	1	i1_LQ_Rweevil_c82502/f1p0/1861	0
GO:0031342	negative regulation of cell killing	biological_process	0.11575	1	1	3203	1	27707	1	i2_HQ_Rweevil_c91620/f2p0/2057	0
GO:0004425	indole-3-glycerol-phosphate synthase activity	molecular_function	0.11625	1	1	3203	1	27707	0		1	i2_HQ_Rweevil_c73820/f17p1/2269
GO:0015093	ferrous iron transmembrane transporter activity	molecular_function	0.11631	1	1	3203	1	27707	0		1	i2_LQ_Rweevil_c112147/f1p2/2308
GO:0015684	ferrous iron transport	biological_process	0.11631	1	1	3203	1	27707	0		1	i2_LQ_Rweevil_c112147/f1p2/2308
GO:0042113	B cell activation	biological_process	0.11634	1	1	3203	1	27707	1	i2_LQ_Rweevil_c24541/f1p3/2342	0
GO:0012502	induction of programmed cell death	biological_process	0.11644	1	1	3203	1	27707	1	i2_HQ_Rweevil_c60720/f3p2/2422	0
GO:0019051	induction by virus of host apoptotic process	biological_process	0.11644	1	1	3203	1	27707	1	i2_HQ_Rweevil_c60720/f3p2/2422	0
GO:0031343	positive regulation of cell killing	biological_process	0.11644	1	1	3203	1	27707	1	i2_HQ_Rweevil_c60720/f3p2/2422	0
GO:0044533	positive regulation of apoptotic process in other organism	biological_process	0.11644	1	1	3203	1	27707	1	i2_HQ_Rweevil_c60720/f3p2/2422	0
GO:0051709	regulation of killing of cells of other organism	biological_process	0.11644	1	1	3203	1	27707	1	i2_HQ_Rweevil_c60720/f3p2/2422	0
GO:0051712	positive regulation of killing of cells of other organism	biological_process	0.11644	1	1	3203	1	27707	1	i2_HQ_Rweevil_c60720/f3p2/2422	0
GO:0052042	positive regulation by symbiont of host programmed cell death	biological_process	0.11644	1	1	3203	1	27707	1	i2_HQ_Rweevil_c60720/f3p2/2422	0
GO:0052151	positive regulation by symbiont of host apoptotic process	biological_process	0.11644	1	1	3203	1	27707	1	i2_HQ_Rweevil_c60720/f3p2/2422	0
GO:0052330	positive regulation by organism of programmed cell death in other organism involved in symbiotic interaction	biological_process	0.11644	1	1	3203	1	27707	1	i2_HQ_Rweevil_c60720/f3p2/2422	0
GO:0052501	positive regulation by organism of apoptotic process in other organism involved in symbiotic interaction	biological_process	0.11644	1	1	3203	1	27707	1	i2_HQ_Rweevil_c60720/f3p2/2422	0
GO:0060139	positive regulation of apoptotic process by virus	biological_process	0.11644	1	1	3203	1	27707	1	i2_HQ_Rweevil_c60720/f3p2/2422	0
GO:0035792	other organism postsynaptic membrane	cellular_component	0.11657	1	1	3203	1	27707	1	i2_LQ_Rweevil_c62224/f1p4/2652	0
GO:0016662	oxidoreductase activity, acting on other nitrogenous compounds as donors, cytochrome as acceptor	molecular_function	0.1166	1	1	3203	1	27707	1	i2_LQ_Rweevil_c39535/f1p25/2911	0
GO:0042279	nitrite reductase (cytochrome, ammonia-forming) activity	molecular_function	0.1166	1	1	3203	1	27707	1	i2_LQ_Rweevil_c39535/f1p25/2911	0
GO:0042555	MCM complex	cellular_component	0.1166	1	1	3203	1	27707	0		1	i3_HQ_Rweevil_c29443/f3p0/3019
GO:0019072	viral genome packaging	biological_process	0.1166	1	1	3203	1	27707	1	i3_LQ_Rweevil_c36026/f1p0/3465	0
GO:0008740	L-rhamnose isomerase activity	molecular_function	0.1166	1	1	3203	1	27707	1	i3_LQ_Rweevil_c19703/f1p2/3602	0
GO:0019299	rhamnose metabolic process	biological_process	0.1166	1	1	3203	1	27707	1	i3_LQ_Rweevil_c19703/f1p2/3602	0
GO:0030089	phycobilisome	cellular_component	0.1166	1	1	3203	1	27707	0		1	i4_LQ_Rweevil_c12083/f1p0/4527
GO:0006486	protein glycosylation	biological_process	0.11667	1	15	3203	93	27707	1	i5_LQ_Rweevil_c2078/f1p3/5390	14	i2_LQ_Rweevil_c52506/f42p0/2174,i1_LQ_Rweevil_c68097/f1p0/1836,i4_LQ_Rweevil_c1738/f2p0/4201,i1_LQ_Rweevil_c48436/f1p0/1994,i2_LQ_Rweevil_c132055/f1p4/2478,i2_LQ_Rweevil_c13688/f1p2/2579,i2_HQ_Rweevil_c15406/f49p3/2777,i2_LQ_Rweevil_c106679/f1p92/2418,i2_LQ_Rweevil_c9725/f1p7/2819,i2_LQ_Rweevil_c84441/f1p8/2845,i2_LQ_Rweevil_c85235/f1p3/2850,i1_LQ_Rweevil_c25045/f1p0/1860,i2_LQ_Rweevil_c19512/f1p…
GO:0043413	macromolecule glycosylation	biological_process	0.11667	1	15	3203	93	27707	1	i5_LQ_Rweevil_c2078/f1p3/5390	14	i2_LQ_Rweevil_c132055/f1p4/2478,i1_LQ_Rweevil_c48436/f1p0/1994,i4_LQ_Rweevil_c1738/f2p0/4201,i1_LQ_Rweevil_c68097/f1p0/1836,i2_LQ_Rweevil_c52506/f42p0/2174,i1_LQ_Rweevil_c25045/f1p0/1860,i2_LQ_Rweevil_c19512/f1p3/2852,i2_LQ_Rweevil_c44493/f1p1/2711,i2_LQ_Rweevil_c84441/f1p8/2845,i2_LQ_Rweevil_c85235/f1p3/2850,i2_LQ_Rweevil_c9725/f1p7/2819,i2_LQ_Rweevil_c106679/f1p92/2418,i2_HQ_Rweevil_c15406/f49p…
GO:0070085	glycosylation	biological_process	0.11667	1	15	3203	93	27707	1	i5_LQ_Rweevil_c2078/f1p3/5390	14	i2_LQ_Rweevil_c85235/f1p3/2850,i2_LQ_Rweevil_c84441/f1p8/2845,i2_LQ_Rweevil_c19512/f1p3/2852,i1_LQ_Rweevil_c25045/f1p0/1860,i2_LQ_Rweevil_c44493/f1p1/2711,i2_HQ_Rweevil_c15406/f49p3/2777,i2_LQ_Rweevil_c106679/f1p92/2418,i2_LQ_Rweevil_c9725/f1p7/2819,i2_LQ_Rweevil_c13688/f1p2/2579,i2_LQ_Rweevil_c132055/f1p4/2478,i1_LQ_Rweevil_c48436/f1p0/1994,i4_LQ_Rweevil_c1738/f2p0/4201,i1_LQ_Rweevil_c68097/f1p0…
GO:0004764	shikimate 3-dehydrogenase (NADP+) activity	molecular_function	0.11668	1	1	3203	1	27707	0		1	i5_LQ_Rweevil_c4909/f1p33/5051
GO:0033646	host intracellular part	cellular_component	0.11695	1	7	3203	36	27707	4	i2_HQ_Rweevil_c60720/f3p2/2422,i3_LQ_Rweevil_c36026/f1p0/3465,i1_LQ_Rweevil_c58043/f1p1/1061,i2_HQ_Rweevil_c17297/f5p1/2857	3	i2_HQ_Rweevil_c118314/f2p1/2060,i2_LQ_Rweevil_c68975/f1p3/2004,i2_HQ_Rweevil_c12721/f2p2/2666
GO:0043656	intracellular region of host	cellular_component	0.11695	1	7	3203	36	27707	4	i1_LQ_Rweevil_c58043/f1p1/1061,i2_HQ_Rweevil_c17297/f5p1/2857,i2_HQ_Rweevil_c60720/f3p2/2422,i3_LQ_Rweevil_c36026/f1p0/3465	3	i2_LQ_Rweevil_c68975/f1p3/2004,i2_HQ_Rweevil_c12721/f2p2/2666,i2_HQ_Rweevil_c118314/f2p1/2060
GO:0032502	developmental process	biological_process	0.11832	1	57	3203	423	27707	27	i2_LQ_Rweevil_c84021/f1p2/2607,i2_HQ_Rweevil_c147351/f6p10/2079,i5_HQ_Rweevil_c276/f4p0/5541,i1_HQ_Rweevil_c35180/f2p0/1511,i5_HQ_Rweevil_c557/f2p0/5530,i3_HQ_Rweevil_c5275/f6p0/3254,i3_LQ_Rweevil_c27338/f1p0/3657,i1_LQ_Rweevil_c12419/f1p1/1724,i5_LQ_Rweevil_c1531/f1p3/5630,i1_LQ_Rweevil_c50155/f1p1/1754,i0_LQ_Rweevil_c57882/f1p0/563,i8_LQ_Rweevil_c244/f1p0/8473,i2_LQ_Rweevil_c94128/f1p2/2098,i4_…	30	i1_HQ_Rweevil_c19335/f5p0/1908,i2_LQ_Rweevil_c49592/f1p0/2033,i2_HQ_Rweevil_c34740/f2p1/2209,i4_LQ_Rweevil_c7155/f1p0/4814,i9_HQ_Rweevil_c4/f2p0/9144,i1_LQ_Rweevil_c2608/f1p2/1548,i2_LQ_Rweevil_c86551/f1p1/2872,i7_LQ_Rweevil_c114/f1p0/7273,i5_LQ_Rweevil_c1020/f1p0/5164,i4_LQ_Rweevil_c13321/f1p11/4042,i2_LQ_Rweevil_c8368/f1p19/2381,i5_LQ_Rweevil_c2643/f1p2/5174,i2_LQ_Rweevil_c39657/f1p0/2134,i1_LQ…
GO:0016857	racemase and epimerase activity, acting on carbohydrates and derivatives	molecular_function	0.11935	1	5	3203	23	27707	1	i3_LQ_Rweevil_c5876/f1p0/3592	4	i2_HQ_Rweevil_c73820/f17p1/2269,i1_HQ_Rweevil_c13339/f3p12/1798,i4_LQ_Rweevil_c10606/f1p6/4589,i4_LQ_Rweevil_c5628/f1p0/4227
GO:0022904	respiratory electron transport chain	biological_process	0.11941	1	6	3203	30	27707	5	i0_LQ_Rweevil_c33680/f1p0/515,i4_HQ_Rweevil_c1158/f4p0/4431,i5_HQ_Rweevil_c557/f2p0/5530,i4_LQ_Rweevil_c7765/f1p0/4625,i5_LQ_Rweevil_c3832/f1p6/5509	1	i2_LQ_Rweevil_c42540/f1p4/2402
GO:0007276	gamete generation	biological_process	0.11976	1	4	3203	17	27707	2	i0_LQ_Rweevil_c57882/f1p0/563,i1_LQ_Rweevil_c13623/f1p4/1589	2	i3_LQ_Rweevil_c9661/f1p0/3273,i5_LQ_Rweevil_c1020/f1p0/5164
GO:0042025	host cell nucleus	cellular_component	0.11977	1	5	3203	23	27707	4	i3_LQ_Rweevil_c36026/f1p0/3465,i2_HQ_Rweevil_c60720/f3p2/2422,i2_HQ_Rweevil_c17297/f5p1/2857,i1_LQ_Rweevil_c58043/f1p1/1061	1	i2_LQ_Rweevil_c68975/f1p3/2004
GO:0006873	cellular ion homeostasis	biological_process	0.12006	1	17	3203	112	27707	15	i0_LQ_Rweevil_c50902/f1p0/830,i0_LQ_Rweevil_c38022/f1p0/855,i1_LQ_Rweevil_c35031/f1p0/1055,i0_LQ_Rweevil_c9463/f1p0/919,i0_LQ_Rweevil_c56352/f1p0/985,i2_LQ_Rweevil_c86727/f1p3/2613,i2_HQ_Rweevil_c81693/f2p26/2254,i0_LQ_Rweevil_c10200/f1p12/710,i1_LQ_Rweevil_c30819/f1p9/1646,i1_LQ_Rweevil_c90215/f1p0/1106,i1_LQ_Rweevil_c68931/f1p5/1173,i2_LQ_Rweevil_c56369/f1p8/2079,i2_LQ_Rweevil_c13608/f1p0/2291,…	2	i3_LQ_Rweevil_c7034/f2p0/3847,i0_HQ_Rweevil_c1204/f6p3/814
GO:0006875	cellular metal ion homeostasis	biological_process	0.12006	1	17	3203	112	27707	15	i1_LQ_Rweevil_c90215/f1p0/1106,i1_LQ_Rweevil_c30819/f1p9/1646,i2_HQ_Rweevil_c81693/f2p26/2254,i0_LQ_Rweevil_c10200/f1p12/710,i4_HQ_Rweevil_c1587/f2p0/4333,i2_LQ_Rweevil_c38847/f1p23/2427,i1_LQ_Rweevil_c68931/f1p5/1173,i2_LQ_Rweevil_c56369/f1p8/2079,i2_LQ_Rweevil_c13608/f1p0/2291,i0_LQ_Rweevil_c50902/f1p0/830,i0_LQ_Rweevil_c38022/f1p0/855,i1_LQ_Rweevil_c35031/f1p0/1055,i0_LQ_Rweevil_c56352/f1p0/98…	2	i0_HQ_Rweevil_c1204/f6p3/814,i3_LQ_Rweevil_c7034/f2p0/3847
GO:0030003	cellular cation homeostasis	biological_process	0.12006	1	17	3203	112	27707	15	i0_LQ_Rweevil_c50902/f1p0/830,i0_LQ_Rweevil_c38022/f1p0/855,i0_LQ_Rweevil_c9463/f1p0/919,i1_LQ_Rweevil_c35031/f1p0/1055,i0_LQ_Rweevil_c56352/f1p0/985,i2_LQ_Rweevil_c86727/f1p3/2613,i0_LQ_Rweevil_c10200/f1p12/710,i2_HQ_Rweevil_c81693/f2p26/2254,i1_LQ_Rweevil_c90215/f1p0/1106,i1_LQ_Rweevil_c30819/f1p9/1646,i1_LQ_Rweevil_c68931/f1p5/1173,i2_LQ_Rweevil_c56369/f1p8/2079,i2_LQ_Rweevil_c13608/f1p0/2291,…	2	i3_LQ_Rweevil_c7034/f2p0/3847,i0_HQ_Rweevil_c1204/f6p3/814
GO:0055082	cellular chemical homeostasis	biological_process	0.12006	1	17	3203	112	27707	15	i0_LQ_Rweevil_c38022/f1p0/855,i0_LQ_Rweevil_c50902/f1p0/830,i2_LQ_Rweevil_c86727/f1p3/2613,i0_LQ_Rweevil_c56352/f1p0/985,i0_LQ_Rweevil_c9463/f1p0/919,i1_LQ_Rweevil_c35031/f1p0/1055,i0_LQ_Rweevil_c10200/f1p12/710,i2_HQ_Rweevil_c81693/f2p26/2254,i1_LQ_Rweevil_c90215/f1p0/1106,i1_LQ_Rweevil_c30819/f1p9/1646,i2_LQ_Rweevil_c13608/f1p0/2291,i2_LQ_Rweevil_c56369/f1p8/2079,i1_LQ_Rweevil_c68931/f1p5/1173,…	2	i3_LQ_Rweevil_c7034/f2p0/3847,i0_HQ_Rweevil_c1204/f6p3/814
GO:0071806	protein transmembrane transport	biological_process	0.12155	1	7	3203	37	27707	0		7	i2_LQ_Rweevil_c22287/f1p4/2889,i2_LQ_Rweevil_c116774/f1p1/2668,i6_LQ_Rweevil_c2231/f1p0/6028,i2_LQ_Rweevil_c82722/f1p0/2507,i2_LQ_Rweevil_c23450/f1p5/2669,i6_LQ_Rweevil_c2349/f1p2/6015,i2_LQ_Rweevil_c85150/f1p6/2680
GO:0030131	clathrin adaptor complex	cellular_component	0.12167	1	5	3203	23	27707	2	i2_LQ_Rweevil_c77628/f1p8/3057,i2_LQ_Rweevil_c54820/f1p5/2024	3	i3_LQ_Rweevil_c43479/f1p3/3023,i3_LQ_Rweevil_c33862/f1p0/3352,i3_LQ_Rweevil_c28612/f1p0/3228
GO:0005261	cation channel activity	molecular_function	0.12244	1	20	3203	132	27707	14	i1_LQ_Rweevil_c8309/f1p0/1805,i1_LQ_Rweevil_c30819/f1p9/1646,i6_LQ_Rweevil_c1820/f1p2/6291,i3_LQ_Rweevil_c36265/f1p0/3285,i0_LQ_Rweevil_c10200/f1p12/710,i6_LQ_Rweevil_c392/f1p0/6215,i4_LQ_Rweevil_c4591/f1p0/4277,i4_HQ_Rweevil_c1587/f2p0/4333,i2_LQ_Rweevil_c56369/f1p8/2079,i3_LQ_Rweevil_c33769/f1p0/3187,i2_HQ_Rweevil_c147268/f2p3/2179,i5_LQ_Rweevil_c3209/f1p0/5482,i3_HQ_Rweevil_c1899/f3p3/3226,i1_…	6	i0_HQ_Rweevil_c1204/f6p3/814,i2_LQ_Rweevil_c59048/f1p0/2825,i2_HQ_Rweevil_c51491/f15p5/2116,i2_LQ_Rweevil_c60363/f1p0/2837,i1_LQ_Rweevil_c77054/f1p0/1592,i3_LQ_Rweevil_c7034/f2p0/3847
GO:0019359	nicotinamide nucleotide biosynthetic process	biological_process	0.12296	1	4	3203	17	27707	3	i2_LQ_Rweevil_c2998/f1p3/2300,i2_LQ_Rweevil_c131140/f1p3/2327,i1_HQ_Rweevil_c1913/f4p0/1852	1	i1_HQ_Rweevil_c13339/f3p12/1798
GO:0019363	pyridine nucleotide biosynthetic process	biological_process	0.12296	1	4	3203	17	27707	3	i2_LQ_Rweevil_c2998/f1p3/2300,i2_LQ_Rweevil_c131140/f1p3/2327,i1_HQ_Rweevil_c1913/f4p0/1852	1	i1_HQ_Rweevil_c13339/f3p12/1798
GO:0016791	phosphatase activity	molecular_function	0.12312	1	61	3203	452	27707	31	i7_LQ_Rweevil_c999/f1p0/7049,i4_LQ_Rweevil_c11169/f1p53/4817,i2_LQ_Rweevil_c43626/f1p5/2145,i1_HQ_Rweevil_c56256/f2p0/1039,i4_HQ_Rweevil_c13907/f4p0/4488,i2_HQ_Rweevil_c2264/f15p5/2307,i7_LQ_Rweevil_c276/f1p0/7630,i1_LQ_Rweevil_c22629/f1p0/1596,i3_LQ_Rweevil_c4230/f1p0/3809,i2_HQ_Rweevil_c147050/f4p0/2215,i2_LQ_Rweevil_c54820/f1p5/2024,i5_LQ_Rweevil_c1229/f1p0/5572,i3_LQ_Rweevil_c23318/f1p0/3484,…	30	i1_LQ_Rweevil_c46531/f1p0/1730,i2_LQ_Rweevil_c59632/f1p5/2436,i4_HQ_Rweevil_c657/f10p0/4274,i3_LQ_Rweevil_c13532/f1p0/3124,i3_LQ_Rweevil_c36162/f1p0/3426,i2_LQ_Rweevil_c104712/f1p2/2989,i2_LQ_Rweevil_c9496/f1p0/2819,i2_LQ_Rweevil_c84323/f1p2/2104,i3_LQ_Rweevil_c30605/f1p0/3043,i4_LQ_Rweevil_c2674/f1p0/4141,i4_HQ_Rweevil_c13689/f5p5/4609,i1_HQ_Rweevil_c63950/f5p0/1866,i5_LQ_Rweevil_c4075/f1p5/5143…
GO:0019725	cellular homeostasis	biological_process	0.12314	1	31	3203	221	27707	19	i4_HQ_Rweevil_c1343/f3p0/4493,i4_LQ_Rweevil_c2593/f1p65/4379,i0_LQ_Rweevil_c38022/f1p0/855,i0_LQ_Rweevil_c50902/f1p0/830,i1_LQ_Rweevil_c52948/f1p0/1812,i2_LQ_Rweevil_c86727/f1p3/2613,i0_LQ_Rweevil_c56352/f1p0/985,i0_LQ_Rweevil_c9463/f1p0/919,i1_LQ_Rweevil_c35031/f1p0/1055,i2_HQ_Rweevil_c81693/f2p26/2254,i0_LQ_Rweevil_c10200/f1p12/710,i1_LQ_Rweevil_c30819/f1p9/1646,i1_LQ_Rweevil_c90215/f1p0/1106,i…	12	i2_HQ_Rweevil_c139139/f3p18/2108,i1_LQ_Rweevil_c25468/f1p0/1970,i1_LQ_Rweevil_c147953/f1p13/1002,i2_LQ_Rweevil_c119152/f1p16/1930,i1_LQ_Rweevil_c56064/f3p2/1035,i0_LQ_Rweevil_c880/f12p0/931,i3_LQ_Rweevil_c7034/f2p0/3847,i2_LQ_Rweevil_c77272/f1p3/2480,i1_HQ_Rweevil_c790/f16p0/1607,i2_LQ_Rweevil_c19269/f1p15/2936,i0_HQ_Rweevil_c1204/f6p3/814,i1_LQ_Rweevil_c74253/f1p0/1813
GO:0042600	chorion	cellular_component	0.12331	1	4	3203	17	27707	3	i2_LQ_Rweevil_c84021/f1p2/2607,i7_LQ_Rweevil_c825/f1p16/7440,i0_LQ_Rweevil_c57882/f1p0/563	1	i5_LQ_Rweevil_c1020/f1p0/5164
GO:0002253	activation of immune response	biological_process	0.12375	1	4	3203	17	27707	3	i2_LQ_Rweevil_c59920/f1p1/2934,i1_LQ_Rweevil_c12972/f1p60/1762,i1_LQ_Rweevil_c10445/f1p0/1939	1	i3_LQ_Rweevil_c19966/f1p0/3112
GO:0019898	extrinsic component of membrane	cellular_component	0.12385	1	29	3203	200	27707	17	i3_LQ_Rweevil_c23474/f1p6/3396,i6_HQ_Rweevil_c46/f7p0/6441,i2_LQ_Rweevil_c44954/f1p3/2376,i6_LQ_Rweevil_c412/f1p7/6586,i3_LQ_Rweevil_c8534/f1p5/3661,i4_LQ_Rweevil_c6287/f1p2/4650,i1_LQ_Rweevil_c71593/f1p0/1725,i2_LQ_Rweevil_c55224/f1p4/2604,i8_LQ_Rweevil_c270/f1p0/8923,i1_LQ_Rweevil_c67077/f1p0/1989,i2_LQ_Rweevil_c155015/f1p6/2694,i3_LQ_Rweevil_c21758/f1p0/3789,i3_LQ_Rweevil_c33521/f1p0/3649,i4_H…	12	i2_LQ_Rweevil_c109206/f1p7/2679,i4_LQ_Rweevil_c14251/f1p10/4244,i3_LQ_Rweevil_c34705/f1p0/3181,i2_LQ_Rweevil_c43263/f2p0/2838,i3_HQ_Rweevil_c31743/f11p0/3123,i3_LQ_Rweevil_c43158/f1p0/3009,i2_LQ_Rweevil_c134359/f1p3/2794,i2_HQ_Rweevil_c2548/f5p6/2424,i4_HQ_Rweevil_c930/f5p0/4791,i2_LQ_Rweevil_c57578/f1p1/2936,i3_LQ_Rweevil_c5647/f1p0/3916,i2_LQ_Rweevil_c115091/f1p20/2356
GO:0052855	ADP-dependent NAD(P)H-hydrate dehydratase activity	molecular_function	0.12433	1	3	3203	11	27707	2	i2_LQ_Rweevil_c7072/f1p4/2784,i2_HQ_Rweevil_c22450/f2p3/2955	1	i3_LQ_Rweevil_c30177/f1p0/3049
GO:0030289	protein phosphatase 4 complex	cellular_component	0.12449	1	3	3203	11	27707	2	i2_HQ_Rweevil_c147837/f3p5/2250,i2_LQ_Rweevil_c14795/f1p4/2163	1	i3_LQ_Rweevil_c3672/f1p15/3077
GO:0002429	immune response-activating cell surface receptor signaling pathway	biological_process	0.12478	1	3	3203	11	27707	2	i1_LQ_Rweevil_c12972/f1p60/1762,i1_LQ_Rweevil_c10445/f1p0/1939	1	i3_LQ_Rweevil_c19966/f1p0/3112
GO:0002757	immune response-activating signal transduction	biological_process	0.12478	1	3	3203	11	27707	2	i1_LQ_Rweevil_c10445/f1p0/1939,i1_LQ_Rweevil_c12972/f1p60/1762	1	i3_LQ_Rweevil_c19966/f1p0/3112
GO:0002768	immune response-regulating cell surface receptor signaling pathway	biological_process	0.12478	1	3	3203	11	27707	2	i1_LQ_Rweevil_c12972/f1p60/1762,i1_LQ_Rweevil_c10445/f1p0/1939	1	i3_LQ_Rweevil_c19966/f1p0/3112
GO:0050851	antigen receptor-mediated signaling pathway	biological_process	0.12478	1	3	3203	11	27707	2	i1_LQ_Rweevil_c10445/f1p0/1939,i1_LQ_Rweevil_c12972/f1p60/1762	1	i3_LQ_Rweevil_c19966/f1p0/3112
GO:0007267	cell-cell signaling	biological_process	0.1252	1	6	3203	30	27707	1	i4_LQ_Rweevil_c8354/f1p9/4855	5	i2_HQ_Rweevil_c21293/f2p1/2845,i2_HQ_Rweevil_c41479/f2p4/2876,i3_HQ_Rweevil_c1520/f5p5/3162,i3_HQ_Rweevil_c40793/f26p0/3200,i0_LQ_Rweevil_c22873/f1p0/943
GO:2000026	regulation of multicellular organismal development	biological_process	0.12672	1	6	3203	30	27707	3	i2_LQ_Rweevil_c55224/f1p4/2604,i1_LQ_Rweevil_c50155/f1p1/1754,i1_LQ_Rweevil_c67077/f1p0/1989	3	i11_LQ_Rweevil_c12/f1p0/11139,i7_LQ_Rweevil_c114/f1p0/7273,i2_LQ_Rweevil_c58118/f1p0/2812
GO:0008092	cytoskeletal protein binding	molecular_function	0.12703	1	90	3203	688	27707	45	i2_LQ_Rweevil_c155015/f1p6/2694,i3_LQ_Rweevil_c17675/f1p0/3958,i3_LQ_Rweevil_c5680/f1p0/3407,i1_LQ_Rweevil_c8817/f1p0/1693,i9_LQ_Rweevil_c65/f1p0/9271,i2_LQ_Rweevil_c98680/f1p11/2728,i6_LQ_Rweevil_c1852/f1p0/6241,i1_LQ_Rweevil_c11555/f1p7/1920,i2_LQ_Rweevil_c58365/f1p10/1997,i8_LQ_Rweevil_c270/f1p0/8923,i1_LQ_Rweevil_c8245/f1p32/1805,i1_LQ_Rweevil_c67077/f1p0/1989,i2_LQ_Rweevil_c37529/f1p10/2370,…	45	i2_LQ_Rweevil_c109220/f1p20/2862,i2_LQ_Rweevil_c57578/f1p1/2936,i2_LQ_Rweevil_c115091/f1p20/2356,i2_HQ_Rweevil_c139473/f2p8/2032,i3_LQ_Rweevil_c12706/f1p0/3088,i3_HQ_Rweevil_c40313/f44p0/3467,i2_LQ_Rweevil_c57117/f1p11/2230,i4_LQ_Rweevil_c2451/f1p0/4298,i2_LQ_Rweevil_c24813/f1p1/2432,i2_LQ_Rweevil_c132049/f1p7/2523,i4_LQ_Rweevil_c13008/f1p7/4042,i4_HQ_Rweevil_c930/f5p0/4791,i0_HQ_Rweevil_c11851/f…
GO:0033043	regulation of organelle organization	biological_process	0.12744	1	24	3203	162	27707	8	i2_LQ_Rweevil_c155015/f1p6/2694,i8_LQ_Rweevil_c270/f1p0/8923,i1_LQ_Rweevil_c67604/f1p0/1751,i3_LQ_Rweevil_c28485/f1p0/3157,i1_LQ_Rweevil_c6761/f1p9/1674,i3_LQ_Rweevil_c26367/f1p3/3224,i4_LQ_Rweevil_c8154/f1p0/4809,i3_LQ_Rweevil_c11432/f1p0/3270	16	i3_LQ_Rweevil_c34058/f1p0/3086,i3_LQ_Rweevil_c2747/f1p0/3313,i3_LQ_Rweevil_c15181/f1p0/3061,i2_HQ_Rweevil_c31737/f28p1/2264,i3_LQ_Rweevil_c26847/f1p1/3275,i3_LQ_Rweevil_c29801/f1p0/3108,i3_HQ_Rweevil_c40362/f2p0/3048,i2_LQ_Rweevil_c108261/f1p2/2820,i2_HQ_Rweevil_c81295/f2p0/2832,i3_HQ_Rweevil_c37843/f4p8/3049,i3_LQ_Rweevil_c15089/f1p1/3036,i3_LQ_Rweevil_c7034/f2p0/3847,i3_LQ_Rweevil_c25836/f1p0/3…
GO:0033036	macromolecule localization	biological_process	0.12847	1	191	3203	1528	27707	80	i2_LQ_Rweevil_c23530/f1p2/2987,i1_LQ_Rweevil_c14992/f1p10/1123,i2_LQ_Rweevil_c61004/f1p7/2613,i2_LQ_Rweevil_c77628/f1p8/3057,i1_LQ_Rweevil_c4272/f2p0/1985,i2_HQ_Rweevil_c17608/f8p11/2719,i4_LQ_Rweevil_c9253/f1p0/4360,i1_LQ_Rweevil_c50155/f1p1/1754,i8_LQ_Rweevil_c244/f1p0/8473,i5_LQ_Rweevil_c4622/f1p0/5571,i2_LQ_Rweevil_c8029/f1p66/2558,i2_LQ_Rweevil_c55224/f1p4/2604,i5_LQ_Rweevil_c5084/f1p4/5096,…	111	i0_HQ_Rweevil_c881/f7p5/919,i3_HQ_Rweevil_c1690/f6p0/3777,i3_HQ_Rweevil_c31743/f11p0/3123,i2_LQ_Rweevil_c111421/f1p10/2449,i2_LQ_Rweevil_c25675/f1p4/2228,i4_LQ_Rweevil_c9939/f1p2/5014,i4_LQ_Rweevil_c3013/f1p6/4894,i3_LQ_Rweevil_c34225/f1p0/3778,i3_HQ_Rweevil_c1882/f5p0/3217,i2_LQ_Rweevil_c79187/f1p5/2298,i4_HQ_Rweevil_c1117/f4p0/4280,i2_LQ_Rweevil_c88973/f1p4/2732,i6_LQ_Rweevil_c1261/f1p0/6409,i3…
GO:0008083	growth factor activity	molecular_function	0.12852	1	13	3203	80	27707	2	i1_LQ_Rweevil_c2146/f2p2/1309,i10_LQ_Rweevil_c126/f1p0/10428	11	i0_LQ_Rweevil_c47751/f3p0/849,i1_HQ_Rweevil_c96183/f22p0/1577,i1_LQ_Rweevil_c41478/f1p2/1226,i1_HQ_Rweevil_c1710/f8p0/1872,i2_LQ_Rweevil_c84779/f1p14/2891,i0_LQ_Rweevil_c23030/f1p401/816,i2_LQ_Rweevil_c49935/f1p21/2122,i1_LQ_Rweevil_c146834/f1p0/1017,i1_LQ_Rweevil_c43311/f1p0/1185,i3_LQ_Rweevil_c12706/f1p0/3088,i5_LQ_Rweevil_c4720/f1p0/5277
GO:0043934	sporulation	biological_process	0.12894	1	8	3203	45	27707	7	i4_LQ_Rweevil_c8635/f1p11/4756,i3_LQ_Rweevil_c22669/f1p0/3277,i5_HQ_Rweevil_c276/f4p0/5541,i2_LQ_Rweevil_c94128/f1p2/2098,i8_LQ_Rweevil_c244/f1p0/8473,i6_LQ_Rweevil_c646/f1p0/6611,i5_LQ_Rweevil_c5084/f1p4/5096	1	i1_HQ_Rweevil_c19335/f5p0/1908
GO:0006816	calcium ion transport	biological_process	0.13161	1	7	3203	37	27707	6	i6_LQ_Rweevil_c392/f1p0/6215,i6_LQ_Rweevil_c1820/f1p2/6291,i1_LQ_Rweevil_c8453/f1p2/1955,i5_LQ_Rweevil_c3209/f1p0/5482,i1_LQ_Rweevil_c8309/f1p0/1805,i4_LQ_Rweevil_c4591/f1p0/4277	1	i2_HQ_Rweevil_c51491/f15p5/2116
GO:0005912	adherens junction	cellular_component	0.13197	1	4	3203	17	27707	2	i2_LQ_Rweevil_c58365/f1p10/1997,i3_LQ_Rweevil_c17981/f1p0/3426	2	i5_LQ_Rweevil_c4840/f1p0/5026,i5_LQ_Rweevil_c3840/f1p0/5104
GO:0005924	cell-substrate adherens junction	cellular_component	0.13197	1	4	3203	17	27707	2	i3_LQ_Rweevil_c17981/f1p0/3426,i2_LQ_Rweevil_c58365/f1p10/1997	2	i5_LQ_Rweevil_c3840/f1p0/5104,i5_LQ_Rweevil_c4840/f1p0/5026
GO:0005925	focal adhesion	cellular_component	0.13197	1	4	3203	17	27707	2	i3_LQ_Rweevil_c17981/f1p0/3426,i2_LQ_Rweevil_c58365/f1p10/1997	2	i5_LQ_Rweevil_c3840/f1p0/5104,i5_LQ_Rweevil_c4840/f1p0/5026
GO:0030055	cell-substrate junction	cellular_component	0.13197	1	4	3203	17	27707	2	i3_LQ_Rweevil_c17981/f1p0/3426,i2_LQ_Rweevil_c58365/f1p10/1997	2	i5_LQ_Rweevil_c4840/f1p0/5026,i5_LQ_Rweevil_c3840/f1p0/5104
GO:0070161	anchoring junction	cellular_component	0.13197	1	4	3203	17	27707	2	i2_LQ_Rweevil_c58365/f1p10/1997,i3_LQ_Rweevil_c17981/f1p0/3426	2	i5_LQ_Rweevil_c3840/f1p0/5104,i5_LQ_Rweevil_c4840/f1p0/5026
GO:0006261	DNA-dependent DNA replication	biological_process	0.13222	1	24	3203	165	27707	11	i2_HQ_Rweevil_c147837/f3p5/2250,i1_HQ_Rweevil_c83822/f9p37/1119,i0_LQ_Rweevil_c56803/f1p2/844,i7_LQ_Rweevil_c645/f1p0/7459,i5_LQ_Rweevil_c4622/f1p0/5571,i0_LQ_Rweevil_c10200/f1p12/710,i3_LQ_Rweevil_c23687/f1p1/3657,i1_LQ_Rweevil_c40618/f1p0/1947,i2_HQ_Rweevil_c54169/f2p1/2233,i1_LQ_Rweevil_c71593/f1p0/1725,i4_LQ_Rweevil_c5278/f1p0/4368	13	i2_LQ_Rweevil_c62366/f1p0/2241,i4_LQ_Rweevil_c7820/f1p0/4446,i2_LQ_Rweevil_c123280/f1p6/2106,i2_LQ_Rweevil_c142681/f1p1/2102,i3_HQ_Rweevil_c29443/f3p0/3019,i2_LQ_Rweevil_c59462/f1p1/2443,i4_HQ_Rweevil_c1377/f3p0/4259,i2_LQ_Rweevil_c44678/f1p2/2232,i1_HQ_Rweevil_c96747/f5p0/1770,i2_LQ_Rweevil_c111760/f1p2/2381,i1_HQ_Rweevil_c1710/f8p0/1872,i4_HQ_Rweevil_c657/f10p0/4274,i2_LQ_Rweevil_c18275/f1p3/26…
GO:0042221	response to chemical	biological_process	0.13264	1	37	3203	266	27707	18	i3_LQ_Rweevil_c28121/f1p0/3628,i2_HQ_Rweevil_c91620/f2p0/2057,i7_LQ_Rweevil_c551/f1p0/7327,i2_LQ_Rweevil_c109811/f1p22/2985,i3_LQ_Rweevil_c24154/f1p0/3513,i1_LQ_Rweevil_c4940/f1p0/1795,i7_LQ_Rweevil_c707/f1p0/7991,i1_LQ_Rweevil_c30819/f1p9/1646,i2_LQ_Rweevil_c98680/f1p11/2728,i3_HQ_Rweevil_c40635/f18p0/3497,i4_LQ_Rweevil_c6428/f1p4/4685,i5_LQ_Rweevil_c4622/f1p0/5571,i5_LQ_Rweevil_c1565/f1p1/5949,…	19	i2_LQ_Rweevil_c106904/f1p31/3031,i2_LQ_Rweevil_c133344/f1p13/2174,i2_LQ_Rweevil_c54741/f1p0/2711,i1_LQ_Rweevil_c28081/f1p0/1942,i1_LQ_Rweevil_c77191/f1p3/1206,i2_LQ_Rweevil_c23813/f1p14/2604,i2_LQ_Rweevil_c6590/f1p2/2554,i4_LQ_Rweevil_c12000/f1p0/4210,i2_LQ_Rweevil_c86544/f1p7/2700,i2_LQ_Rweevil_c109220/f1p20/2862,i2_LQ_Rweevil_c78895/f1p13/2385,i2_LQ_Rweevil_c86378/f1p3/2200,i7_LQ_Rweevil_c688/f…
GO:0022414	reproductive process	biological_process	0.13291	1	12	3203	73	27707	7	i5_LQ_Rweevil_c4055/f1p6/5925,i0_LQ_Rweevil_c57882/f1p0/563,i3_LQ_Rweevil_c20294/f1p0/3945,i1_LQ_Rweevil_c13623/f1p4/1589,i3_LQ_Rweevil_c27338/f1p0/3657,i5_LQ_Rweevil_c1571/f1p32/5873,i2_LQ_Rweevil_c135544/f1p43/2975	5	i4_LQ_Rweevil_c3027/f1p0/4655,i3_LQ_Rweevil_c9661/f1p0/3273,i5_LQ_Rweevil_c1020/f1p0/5164,i4_LQ_Rweevil_c9987/f1p0/4159,i3_LQ_Rweevil_c13532/f1p0/3124
GO:0044391	ribosomal subunit	cellular_component	0.13391	1	6	3203	31	27707	6	i4_LQ_Rweevil_c2340/f1p1/4658,i1_HQ_Rweevil_c4583/f2p0/1983,i2_LQ_Rweevil_c63101/f1p6/2132,i3_LQ_Rweevil_c35304/f1p0/3843,i2_LQ_Rweevil_c84552/f1p1/2275,i3_LQ_Rweevil_c35598/f1p0/3203	0
GO:0019838	growth factor binding	molecular_function	0.1343	1	3	3203	12	27707	2	i0_HQ_Rweevil_c13223/f3p4/493,i0_LQ_Rweevil_c6690/f1p0/555	1	i4_LQ_Rweevil_c6211/f1p3/4739
GO:0055065	metal ion homeostasis	biological_process	0.13455	1	17	3203	114	27707	15	i1_LQ_Rweevil_c30819/f1p9/1646,i1_LQ_Rweevil_c90215/f1p0/1106,i2_HQ_Rweevil_c81693/f2p26/2254,i0_LQ_Rweevil_c10200/f1p12/710,i4_HQ_Rweevil_c1587/f2p0/4333,i2_LQ_Rweevil_c38847/f1p23/2427,i1_LQ_Rweevil_c68931/f1p5/1173,i2_LQ_Rweevil_c13608/f1p0/2291,i2_LQ_Rweevil_c56369/f1p8/2079,i0_LQ_Rweevil_c50902/f1p0/830,i0_LQ_Rweevil_c38022/f1p0/855,i0_LQ_Rweevil_c9463/f1p0/919,i0_LQ_Rweevil_c56352/f1p0/985,…	2	i0_HQ_Rweevil_c1204/f6p3/814,i3_LQ_Rweevil_c7034/f2p0/3847
GO:0006913	nucleocytoplasmic transport	biological_process	0.13464	1	30	3203	210	27707	15	i5_LQ_Rweevil_c1162/f1p0/5267,i3_LQ_Rweevil_c11141/f1p3/3205,i5_LQ_Rweevil_c1281/f1p0/5711,i8_LQ_Rweevil_c270/f1p0/8923,i5_LQ_Rweevil_c1823/f1p0/5203,i1_LQ_Rweevil_c67077/f1p0/1989,i3_LQ_Rweevil_c24250/f1p0/3313,i1_LQ_Rweevil_c50155/f1p1/1754,i3_LQ_Rweevil_c4988/f1p0/3263,i4_LQ_Rweevil_c4177/f1p1/4420,i1_LQ_Rweevil_c4272/f2p0/1985,i2_LQ_Rweevil_c55224/f1p4/2604,i6_LQ_Rweevil_c412/f1p7/6586,i4_LQ_…	15	i2_LQ_Rweevil_c88626/f1p2/2735,i3_HQ_Rweevil_c1882/f5p0/3217,i3_LQ_Rweevil_c27717/f1p0/3741,i2_HQ_Rweevil_c2548/f5p6/2424,i2_LQ_Rweevil_c68975/f1p3/2004,i2_LQ_Rweevil_c154820/f1p6/2288,i1_LQ_Rweevil_c43311/f1p0/1185,i2_LQ_Rweevil_c109206/f1p7/2679,i2_LQ_Rweevil_c3153/f1p20/2545,i2_HQ_Rweevil_c139473/f2p8/2032,i3_LQ_Rweevil_c42008/f1p39/3589,i2_LQ_Rweevil_c38367/f1p5/2852,i2_LQ_Rweevil_c38010/f1p4…
GO:0051169	nuclear transport	biological_process	0.13464	1	30	3203	210	27707	15	i2_LQ_Rweevil_c55224/f1p4/2604,i4_LQ_Rweevil_c4177/f1p1/4420,i1_LQ_Rweevil_c4272/f2p0/1985,i4_LQ_Rweevil_c6287/f1p2/4650,i2_LQ_Rweevil_c135408/f1p7/2494,i6_LQ_Rweevil_c412/f1p7/6586,i1_LQ_Rweevil_c50155/f1p1/1754,i3_LQ_Rweevil_c24250/f1p0/3313,i3_LQ_Rweevil_c4988/f1p0/3263,i5_LQ_Rweevil_c1281/f1p0/5711,i3_LQ_Rweevil_c11141/f1p3/3205,i5_LQ_Rweevil_c1162/f1p0/5267,i1_LQ_Rweevil_c67077/f1p0/1989,i8_…	15	i3_HQ_Rweevil_c31743/f11p0/3123,i2_LQ_Rweevil_c38010/f1p4/2512,i5_LQ_Rweevil_c4662/f1p0/5091,i2_LQ_Rweevil_c38367/f1p5/2852,i2_HQ_Rweevil_c139473/f2p8/2032,i3_LQ_Rweevil_c42008/f1p39/3589,i1_LQ_Rweevil_c43311/f1p0/1185,i2_LQ_Rweevil_c109206/f1p7/2679,i2_LQ_Rweevil_c3153/f1p20/2545,i2_LQ_Rweevil_c68975/f1p3/2004,i2_LQ_Rweevil_c154820/f1p6/2288,i3_LQ_Rweevil_c27717/f1p0/3741,i2_HQ_Rweevil_c2548/f5p…
GO:0005992	trehalose biosynthetic process	biological_process	0.13527	1	5	3203	24	27707	5	i3_LQ_Rweevil_c11128/f1p4/3153,i2_LQ_Rweevil_c84177/f1p13/3126,i3_HQ_Rweevil_c17946/f2p9/3378,i1_LQ_Rweevil_c31482/f1p3/1487,i4_LQ_Rweevil_c5412/f1p0/4158	0
GO:0022406	membrane docking	biological_process	0.13601	1	16	3203	103	27707	4	i1_LQ_Rweevil_c11288/f1p0/1630,i2_LQ_Rweevil_c108130/f1p1/2532,i3_LQ_Rweevil_c20553/f1p0/3560,i2_LQ_Rweevil_c82033/f1p1/2682	12	i2_LQ_Rweevil_c80275/f1p2/2521,i2_HQ_Rweevil_c126113/f13p1/2521,i2_LQ_Rweevil_c22287/f1p4/2889,i2_LQ_Rweevil_c85150/f1p6/2680,i2_LQ_Rweevil_c82722/f1p0/2507,i2_LQ_Rweevil_c41149/f1p2/2161,i2_LQ_Rweevil_c116774/f1p1/2668,i2_HQ_Rweevil_c76145/f6p4/2553,i1_LQ_Rweevil_c52851/f1p0/1925,i2_LQ_Rweevil_c5957/f1p1/2558,i2_LQ_Rweevil_c23450/f1p5/2669,i2_LQ_Rweevil_c41618/f1p2/2256
GO:0000276	mitochondrial proton-transporting ATP synthase complex, coupling factor F(o)	cellular_component	0.13733	1	9	3203	53	27707	3	i6_LQ_Rweevil_c825/f1p16/6429,i1_LQ_Rweevil_c34353/f1p0/1023,i2_HQ_Rweevil_c78235/f2p2/2278	6	i2_LQ_Rweevil_c108641/f1p22/2954,i1_HQ_Rweevil_c121140/f49p0/1116,i3_LQ_Rweevil_c15089/f1p1/3036,i2_HQ_Rweevil_c73812/f71p8/2921,i2_LQ_Rweevil_c87523/f1p5/2582,i1_LQ_Rweevil_c34927/f1p56/1047
GO:0033647	host intracellular organelle	cellular_component	0.13773	1	5	3203	24	27707	4	i1_LQ_Rweevil_c58043/f1p1/1061,i2_HQ_Rweevil_c17297/f5p1/2857,i2_HQ_Rweevil_c60720/f3p2/2422,i3_LQ_Rweevil_c36026/f1p0/3465	1	i2_LQ_Rweevil_c68975/f1p3/2004
GO:0033648	host intracellular membrane-bounded organelle	cellular_component	0.13773	1	5	3203	24	27707	4	i2_HQ_Rweevil_c60720/f3p2/2422,i3_LQ_Rweevil_c36026/f1p0/3465,i1_LQ_Rweevil_c58043/f1p1/1061,i2_HQ_Rweevil_c17297/f5p1/2857	1	i2_LQ_Rweevil_c68975/f1p3/2004
GO:0019784	NEDD8-specific protease activity	molecular_function	0.13804	1	2	3203	6	27707	0		2	i2_LQ_Rweevil_c59462/f1p1/2443,i2_LQ_Rweevil_c142681/f1p1/2102
GO:0039693	viral DNA genome replication	biological_process	0.13804	1	2	3203	6	27707	0		2	i2_LQ_Rweevil_c142681/f1p1/2102,i2_LQ_Rweevil_c59462/f1p1/2443
GO:0044034	multi-organism biosynthetic process	biological_process	0.13804	1	2	3203	6	27707	0		2	i2_LQ_Rweevil_c142681/f1p1/2102,i2_LQ_Rweevil_c59462/f1p1/2443
GO:0098796	membrane protein complex	cellular_component	0.1386	1	119	3203	939	27707	57	i2_HQ_Rweevil_c78235/f2p2/2278,i2_LQ_Rweevil_c57464/f1p25/2964,i0_LQ_Rweevil_c3572/f1p0/757,i2_LQ_Rweevil_c78683/f1p0/2308,i2_HQ_Rweevil_c34506/f2p1/2172,i2_LQ_Rweevil_c8751/f1p23/3093,i1_LQ_Rweevil_c8453/f1p2/1955,i0_HQ_Rweevil_c1230/f6p0/455,i2_LQ_Rweevil_c109951/f1p7/2840,i2_HQ_Rweevil_c50762/f23p5/2889,i2_LQ_Rweevil_c55224/f1p4/2604,i5_LQ_Rweevil_c2078/f1p3/5390,i4_LQ_Rweevil_c13238/f1p0/4044…	62	i6_LQ_Rweevil_c2231/f1p0/6028,i4_LQ_Rweevil_c2215/f1p3/4424,i3_LQ_Rweevil_c12587/f1p0/3810,i3_LQ_Rweevil_c12603/f1p0/3377,i3_LQ_Rweevil_c8514/f1p7/3702,i4_LQ_Rweevil_c12083/f1p0/4527,i4_LQ_Rweevil_c5122/f1p0/4699,i2_LQ_Rweevil_c77177/f1p2/3010,i4_LQ_Rweevil_c11845/f1p6/4192,i1_LQ_Rweevil_c91477/f1p0/1090,i5_LQ_Rweevil_c5160/f1p0/5009,i2_LQ_Rweevil_c38367/f1p5/2852,i1_LQ_Rweevil_c73447/f1p5/1598,i…
GO:0048609	multicellular organismal reproductive process	biological_process	0.14192	1	4	3203	18	27707	2	i1_LQ_Rweevil_c13623/f1p4/1589,i0_LQ_Rweevil_c57882/f1p0/563	2	i5_LQ_Rweevil_c1020/f1p0/5164,i3_LQ_Rweevil_c9661/f1p0/3273
GO:0008924	malate dehydrogenase (quinone) activity	molecular_function	0.14478	1	2	3203	6	27707	2	i1_HQ_Rweevil_c29789/f4p0/1677,i1_LQ_Rweevil_c5098/f1p0/1686	0
GO:0016901	oxidoreductase activity, acting on the CH-OH group of donors, quinone or similar compound as acceptor	molecular_function	0.14478	1	2	3203	6	27707	2	i1_HQ_Rweevil_c29789/f4p0/1677,i1_LQ_Rweevil_c5098/f1p0/1686	0
GO:0006081	cellular aldehyde metabolic process	biological_process	0.14519	1	3	3203	12	27707	2	i1_LQ_Rweevil_c89505/f1p0/1034,i2_LQ_Rweevil_c39475/f1p2/2722	1	i1_HQ_Rweevil_c52526/f2p0/1825
GO:0015103	inorganic anion transmembrane transporter activity	molecular_function	0.14566	1	13	3203	81	27707	6	i4_LQ_Rweevil_c8408/f1p3/4120,i6_LQ_Rweevil_c1924/f1p6/6892,i3_LQ_Rweevil_c4368/f1p34/3174,i2_LQ_Rweevil_c79177/f1p0/2681,i2_LQ_Rweevil_c111209/f1p1/2894,i1_HQ_Rweevil_c1753/f10p3/1709	7	i5_LQ_Rweevil_c1930/f1p13/5305,i3_HQ_Rweevil_c13063/f2p0/3444,i2_LQ_Rweevil_c88015/f1p8/2583,i2_LQ_Rweevil_c61461/f1p1/2321,i3_LQ_Rweevil_c18759/f1p0/3730,i3_LQ_Rweevil_c6635/f1p1/3900,i2_HQ_Rweevil_c9113/f3p0/2713
GO:0002684	positive regulation of immune system process	biological_process	0.14585	1	4	3203	18	27707	3	i2_LQ_Rweevil_c59920/f1p1/2934,i1_LQ_Rweevil_c10445/f1p0/1939,i1_LQ_Rweevil_c12972/f1p60/1762	1	i3_LQ_Rweevil_c19966/f1p0/3112
GO:0050778	positive regulation of immune response	biological_process	0.14585	1	4	3203	18	27707	3	i2_LQ_Rweevil_c59920/f1p1/2934,i1_LQ_Rweevil_c12972/f1p60/1762,i1_LQ_Rweevil_c10445/f1p0/1939	1	i3_LQ_Rweevil_c19966/f1p0/3112
GO:0015721	bile acid and bile salt transport	biological_process	0.14672	1	2	3203	6	27707	2	i2_LQ_Rweevil_c108705/f1p2/2381,i2_LQ_Rweevil_c61004/f1p7/2613	0
GO:0015850	organic hydroxy compound transport	biological_process	0.14672	1	2	3203	6	27707	2	i2_LQ_Rweevil_c108705/f1p2/2381,i2_LQ_Rweevil_c61004/f1p7/2613	0
GO:0046982	protein heterodimerization activity	molecular_function	0.14672	1	2	3203	6	27707	2	i2_LQ_Rweevil_c108705/f1p2/2381,i2_LQ_Rweevil_c61004/f1p7/2613	0
GO:0008483	transaminase activity	molecular_function	0.14768	1	4	3203	18	27707	2	i1_LQ_Rweevil_c50912/f1p0/1656,i2_LQ_Rweevil_c109928/f1p6/2715	2	i1_LQ_Rweevil_c12364/f1p5/1703,i1_HQ_Rweevil_c39806/f8p0/1666
GO:0004683	calmodulin-dependent protein kinase activity	molecular_function	0.14994	1	4	3203	18	27707	1	i5_HQ_Rweevil_c558/f2p0/5401	3	i5_LQ_Rweevil_c3062/f1p6/5663,i2_HQ_Rweevil_c1571/f9p32/2954,i2_LQ_Rweevil_c106904/f1p31/3031
GO:0016701	oxidoreductase activity, acting on single donors with incorporation of molecular oxygen	molecular_function	0.15012	1	14	3203	90	27707	7	i1_LQ_Rweevil_c6712/f1p0/1175,i4_LQ_Rweevil_c5997/f1p1/4781,i2_LQ_Rweevil_c55224/f1p4/2604,i3_LQ_Rweevil_c6668/f1p0/3161,i4_LQ_Rweevil_c7825/f1p6/4210,i2_LQ_Rweevil_c25225/f1p8/2143,i1_LQ_Rweevil_c11458/f1p0/1570	7	i3_LQ_Rweevil_c27969/f1p0/3702,i2_LQ_Rweevil_c95933/f1p3/2119,i2_HQ_Rweevil_c73820/f17p1/2269,i1_LQ_Rweevil_c16810/f1p0/1069,i7_LQ_Rweevil_c453/f1p0/7423,i1_LQ_Rweevil_c91074/f1p0/1127,i1_LQ_Rweevil_c56388/f1p0/1048
GO:0009415	response to water	biological_process	0.1502	1	2	3203	6	27707	2	i7_LQ_Rweevil_c707/f1p0/7991,i5_LQ_Rweevil_c1565/f1p1/5949	0
GO:0046351	disaccharide biosynthetic process	biological_process	0.15225	1	5	3203	25	27707	5	i3_HQ_Rweevil_c17946/f2p9/3378,i1_LQ_Rweevil_c31482/f1p3/1487,i4_LQ_Rweevil_c5412/f1p0/4158,i3_LQ_Rweevil_c11128/f1p4/3153,i2_LQ_Rweevil_c84177/f1p13/3126	0
GO:0051056	regulation of small GTPase mediated signal transduction	biological_process	0.15519	1	25	3203	173	27707	13	i2_LQ_Rweevil_c135544/f1p43/2975,i4_HQ_Rweevil_c14081/f3p0/4198,i2_LQ_Rweevil_c113219/f1p8/2384,i2_LQ_Rweevil_c3286/f1p32/2374,i2_LQ_Rweevil_c108502/f1p2/2897,i6_LQ_Rweevil_c743/f1p0/6626,i3_LQ_Rweevil_c3527/f1p0/3601,i7_LQ_Rweevil_c915/f1p0/7979,i4_LQ_Rweevil_c2959/f1p3/4234,i3_LQ_Rweevil_c26074/f1p0/3888,i2_LQ_Rweevil_c6991/f1p33/2179,i3_LQ_Rweevil_c10116/f1p0/3510,i3_LQ_Rweevil_c18949/f1p0/3593	12	i2_LQ_Rweevil_c15036/f1p1/2042,i4_LQ_Rweevil_c12942/f1p4/4120,i4_HQ_Rweevil_c1421/f3p0/4115,i6_LQ_Rweevil_c1689/f1p0/6908,i2_LQ_Rweevil_c115222/f1p4/2301,i5_HQ_Rweevil_c213/f6p0/5383,i2_LQ_Rweevil_c41852/f1p3/3616,i4_LQ_Rweevil_c10297/f1p3/4685,i2_LQ_Rweevil_c57749/f1p1/2447,i3_LQ_Rweevil_c20422/f1p1/3553,i5_LQ_Rweevil_c3800/f1p0/5358,i2_LQ_Rweevil_c110667/f1p2/2742
GO:0005088	Ras guanyl-nucleotide exchange factor activity	molecular_function	0.15534	1	19	3203	127	27707	11	i6_LQ_Rweevil_c743/f1p0/6626,i7_LQ_Rweevil_c915/f1p0/7979,i3_LQ_Rweevil_c3527/f1p0/3601,i3_LQ_Rweevil_c26074/f1p0/3888,i2_LQ_Rweevil_c6991/f1p33/2179,i3_LQ_Rweevil_c18949/f1p0/3593,i2_LQ_Rweevil_c113219/f1p8/2384,i4_HQ_Rweevil_c14081/f3p0/4198,i2_LQ_Rweevil_c135544/f1p43/2975,i2_LQ_Rweevil_c3286/f1p32/2374,i2_LQ_Rweevil_c108502/f1p2/2897	8	i2_LQ_Rweevil_c115222/f1p4/2301,i4_LQ_Rweevil_c10297/f1p3/4685,i5_HQ_Rweevil_c213/f6p0/5383,i2_LQ_Rweevil_c41852/f1p3/3616,i3_LQ_Rweevil_c20422/f1p1/3553,i2_LQ_Rweevil_c110667/f1p2/2742,i3_LQ_Rweevil_c30320/f1p0/3789,i6_LQ_Rweevil_c1689/f1p0/6908
GO:0005089	Rho guanyl-nucleotide exchange factor activity	molecular_function	0.15534	1	19	3203	127	27707	11	i7_LQ_Rweevil_c915/f1p0/7979,i3_LQ_Rweevil_c3527/f1p0/3601,i6_LQ_Rweevil_c743/f1p0/6626,i3_LQ_Rweevil_c18949/f1p0/3593,i2_LQ_Rweevil_c6991/f1p33/2179,i3_LQ_Rweevil_c26074/f1p0/3888,i2_LQ_Rweevil_c3286/f1p32/2374,i2_LQ_Rweevil_c113219/f1p8/2384,i4_HQ_Rweevil_c14081/f3p0/4198,i2_LQ_Rweevil_c135544/f1p43/2975,i2_LQ_Rweevil_c108502/f1p2/2897	8	i4_LQ_Rweevil_c10297/f1p3/4685,i2_LQ_Rweevil_c41852/f1p3/3616,i5_HQ_Rweevil_c213/f6p0/5383,i2_LQ_Rweevil_c115222/f1p4/2301,i3_LQ_Rweevil_c30320/f1p0/3789,i2_LQ_Rweevil_c110667/f1p2/2742,i3_LQ_Rweevil_c20422/f1p1/3553,i6_LQ_Rweevil_c1689/f1p0/6908
GO:0004181	metallocarboxypeptidase activity	molecular_function	0.15571	1	9	3203	53	27707	2	i1_HQ_Rweevil_c7099/f5p0/1390,i1_LQ_Rweevil_c59990/f1p12/1974	7	i4_LQ_Rweevil_c11071/f1p0/4609,i1_LQ_Rweevil_c52819/f1p0/1881,i1_LQ_Rweevil_c13950/f2p0/1618,i1_HQ_Rweevil_c17174/f15p1/1971,i2_HQ_Rweevil_c50782/f36p6/2498,i3_LQ_Rweevil_c22037/f1p0/3152,i2_HQ_Rweevil_c13155/f7p6/2368
GO:0008235	metalloexopeptidase activity	molecular_function	0.15571	1	9	3203	53	27707	2	i1_HQ_Rweevil_c7099/f5p0/1390,i1_LQ_Rweevil_c59990/f1p12/1974	7	i2_HQ_Rweevil_c50782/f36p6/2498,i1_LQ_Rweevil_c13950/f2p0/1618,i1_HQ_Rweevil_c17174/f15p1/1971,i1_LQ_Rweevil_c52819/f1p0/1881,i2_HQ_Rweevil_c13155/f7p6/2368,i3_LQ_Rweevil_c22037/f1p0/3152,i4_LQ_Rweevil_c11071/f1p0/4609
GO:0033130	acetylcholine receptor binding	molecular_function	0.15664	1	3	3203	12	27707	1	i4_LQ_Rweevil_c8354/f1p9/4855	2	i2_HQ_Rweevil_c41479/f2p4/2876,i3_HQ_Rweevil_c1520/f5p5/3162
GO:0043495	protein anchor	molecular_function	0.15664	1	3	3203	12	27707	1	i4_LQ_Rweevil_c8354/f1p9/4855	2	i3_HQ_Rweevil_c1520/f5p5/3162,i2_HQ_Rweevil_c41479/f2p4/2876
GO:0030118	clathrin coat	cellular_component	0.15751	1	7	3203	39	27707	2	i2_LQ_Rweevil_c54820/f1p5/2024,i2_LQ_Rweevil_c77628/f1p8/3057	5	i3_LQ_Rweevil_c28612/f1p0/3228,i3_LQ_Rweevil_c33862/f1p0/3352,i6_LQ_Rweevil_c822/f1p0/6346,i3_LQ_Rweevil_c43479/f1p3/3023,i6_LQ_Rweevil_c1261/f1p0/6409
GO:1901606	alpha-amino acid catabolic process	biological_process	0.15754	1	7	3203	39	27707	5	i1_LQ_Rweevil_c6712/f1p0/1175,i4_LQ_Rweevil_c5997/f1p1/4781,i2_LQ_Rweevil_c25225/f1p8/2143,i1_LQ_Rweevil_c11458/f1p0/1570,i3_LQ_Rweevil_c6668/f1p0/3161	2	i0_LQ_Rweevil_c60066/f1p0/893,i2_LQ_Rweevil_c22765/f1p28/2229
GO:0007266	Rho protein signal transduction	biological_process	0.16051	1	18	3203	120	27707	11	i6_LQ_Rweevil_c743/f1p0/6626,i7_LQ_Rweevil_c915/f1p0/7979,i3_LQ_Rweevil_c3527/f1p0/3601,i2_LQ_Rweevil_c6991/f1p33/2179,i3_LQ_Rweevil_c26074/f1p0/3888,i3_LQ_Rweevil_c18949/f1p0/3593,i4_HQ_Rweevil_c14081/f3p0/4198,i2_LQ_Rweevil_c113219/f1p8/2384,i2_LQ_Rweevil_c135544/f1p43/2975,i2_LQ_Rweevil_c3286/f1p32/2374,i2_LQ_Rweevil_c108502/f1p2/2897	7	i2_LQ_Rweevil_c115222/f1p4/2301,i4_LQ_Rweevil_c10297/f1p3/4685,i2_LQ_Rweevil_c41852/f1p3/3616,i5_HQ_Rweevil_c213/f6p0/5383,i3_LQ_Rweevil_c20422/f1p1/3553,i2_LQ_Rweevil_c110667/f1p2/2742,i6_LQ_Rweevil_c1689/f1p0/6908
GO:0035023	regulation of Rho protein signal transduction	biological_process	0.16051	1	18	3203	120	27707	11	i2_LQ_Rweevil_c6991/f1p33/2179,i3_LQ_Rweevil_c26074/f1p0/3888,i3_LQ_Rweevil_c18949/f1p0/3593,i6_LQ_Rweevil_c743/f1p0/6626,i7_LQ_Rweevil_c915/f1p0/7979,i3_LQ_Rweevil_c3527/f1p0/3601,i2_LQ_Rweevil_c108502/f1p2/2897,i4_HQ_Rweevil_c14081/f3p0/4198,i2_LQ_Rweevil_c113219/f1p8/2384,i2_LQ_Rweevil_c135544/f1p43/2975,i2_LQ_Rweevil_c3286/f1p32/2374	7	i3_LQ_Rweevil_c20422/f1p1/3553,i2_LQ_Rweevil_c110667/f1p2/2742,i2_LQ_Rweevil_c115222/f1p4/2301,i4_LQ_Rweevil_c10297/f1p3/4685,i2_LQ_Rweevil_c41852/f1p3/3616,i5_HQ_Rweevil_c213/f6p0/5383,i6_LQ_Rweevil_c1689/f1p0/6908
GO:0016836	hydro-lyase activity	molecular_function	0.16191	1	8	3203	47	27707	6	i1_LQ_Rweevil_c5955/f1p0/1950,i2_LQ_Rweevil_c15102/f1p0/2106,i1_LQ_Rweevil_c50237/f1p0/1712,i2_LQ_Rweevil_c7072/f1p4/2784,i1_HQ_Rweevil_c9599/f3p1/1602,i2_HQ_Rweevil_c22450/f2p3/2955	2	i1_LQ_Rweevil_c5140/f4p8/1500,i3_LQ_Rweevil_c30177/f1p0/3049
GO:0016879	ligase activity, forming carbon-nitrogen bonds	molecular_function	0.16238	1	29	3203	206	27707	20	i1_LQ_Rweevil_c7342/f1p0/1781,i3_LQ_Rweevil_c9581/f1p8/3698,i4_HQ_Rweevil_c13507/f5p0/4318,i8_LQ_Rweevil_c244/f1p0/8473,i3_LQ_Rweevil_c25387/f1p0/3974,i9_LQ_Rweevil_c52/f1p0/9361,i4_HQ_Rweevil_c1587/f2p0/4333,i8_LQ_Rweevil_c102/f1p0/8951,i5_LQ_Rweevil_c5084/f1p4/5096,i5_HQ_Rweevil_c241/f5p0/5603,i1_LQ_Rweevil_c31119/f1p2/1871,i3_LQ_Rweevil_c15131/f1p0/3019,i4_LQ_Rweevil_c10050/f1p1/4230,i2_HQ_Rwe…	9	i2_LQ_Rweevil_c115091/f1p20/2356,i2_HQ_Rweevil_c10277/f5p0/2177,i2_HQ_Rweevil_c147409/f14p10/2426,i3_LQ_Rweevil_c20608/f1p0/3461,i3_HQ_Rweevil_c7602/f4p4/3449,i2_LQ_Rweevil_c60363/f1p0/2837,i2_LQ_Rweevil_c64995/f1p5/2628,i1_LQ_Rweevil_c124727/f1p0/1327,i3_HQ_Rweevil_c17239/f4p0/3170
GO:0006073	cellular glucan metabolic process	biological_process	0.16348	1	8	3203	47	27707	2	i2_LQ_Rweevil_c9947/f1p8/2889,i2_HQ_Rweevil_c34506/f2p1/2172	6	i2_LQ_Rweevil_c110094/f1p13/2480,i2_LQ_Rweevil_c49875/f1p14/2095,i2_HQ_Rweevil_c47113/f2p13/2048,i2_LQ_Rweevil_c29757/f1p13/2068,i2_LQ_Rweevil_c69977/f1p13/2074,i2_HQ_Rweevil_c99536/f30p7/2798
GO:0044042	glucan metabolic process	biological_process	0.16348	1	8	3203	47	27707	2	i2_LQ_Rweevil_c9947/f1p8/2889,i2_HQ_Rweevil_c34506/f2p1/2172	6	i2_HQ_Rweevil_c47113/f2p13/2048,i2_LQ_Rweevil_c49875/f1p14/2095,i2_LQ_Rweevil_c110094/f1p13/2480,i2_HQ_Rweevil_c99536/f30p7/2798,i2_LQ_Rweevil_c29757/f1p13/2068,i2_LQ_Rweevil_c69977/f1p13/2074
GO:0032040	small-subunit processome	cellular_component	0.16402	1	8	3203	47	27707	5	i3_HQ_Rweevil_c2111/f4p0/3643,i2_LQ_Rweevil_c14795/f1p4/2163,i1_HQ_Rweevil_c14225/f2p0/1191,i2_HQ_Rweevil_c147837/f3p5/2250,i1_LQ_Rweevil_c71593/f1p0/1725	3	i4_HQ_Rweevil_c1480/f3p0/4348,i3_LQ_Rweevil_c6842/f1p0/3610,i3_LQ_Rweevil_c25211/f1p0/3950
GO:0006915	apoptotic process	biological_process	0.16443	1	7	3203	40	27707	3	i1_LQ_Rweevil_c22697/f1p0/1478,i3_HQ_Rweevil_c8470/f2p13/3526,i2_HQ_Rweevil_c60720/f3p2/2422	4	i1_HQ_Rweevil_c37687/f25p0/1373,i1_HQ_Rweevil_c96628/f3p0/1154,i0_LQ_Rweevil_c50503/f1p0/803,i2_LQ_Rweevil_c113245/f1p3/2425
GO:0008219	cell death	biological_process	0.16443	1	7	3203	40	27707	3	i1_LQ_Rweevil_c22697/f1p0/1478,i3_HQ_Rweevil_c8470/f2p13/3526,i2_HQ_Rweevil_c60720/f3p2/2422	4	i1_HQ_Rweevil_c37687/f25p0/1373,i1_HQ_Rweevil_c96628/f3p0/1154,i2_LQ_Rweevil_c113245/f1p3/2425,i0_LQ_Rweevil_c50503/f1p0/803
GO:0012501	programmed cell death	biological_process	0.16443	1	7	3203	40	27707	3	i2_HQ_Rweevil_c60720/f3p2/2422,i3_HQ_Rweevil_c8470/f2p13/3526,i1_LQ_Rweevil_c22697/f1p0/1478	4	i2_LQ_Rweevil_c113245/f1p3/2425,i0_LQ_Rweevil_c50503/f1p0/803,i1_HQ_Rweevil_c37687/f25p0/1373,i1_HQ_Rweevil_c96628/f3p0/1154
GO:0016265	death	biological_process	0.16443	1	7	3203	40	27707	3	i1_LQ_Rweevil_c22697/f1p0/1478,i3_HQ_Rweevil_c8470/f2p13/3526,i2_HQ_Rweevil_c60720/f3p2/2422	4	i1_HQ_Rweevil_c37687/f25p0/1373,i1_HQ_Rweevil_c96628/f3p0/1154,i2_LQ_Rweevil_c113245/f1p3/2425,i0_LQ_Rweevil_c50503/f1p0/803
GO:0051128	regulation of cellular component organization	biological_process	0.1645	1	29	3203	208	27707	10	i3_LQ_Rweevil_c26367/f1p3/3224,i3_LQ_Rweevil_c11432/f1p0/3270,i4_LQ_Rweevil_c8154/f1p0/4809,i8_LQ_Rweevil_c270/f1p0/8923,i0_HQ_Rweevil_c13223/f3p4/493,i1_LQ_Rweevil_c67604/f1p0/1751,i2_LQ_Rweevil_c155015/f1p6/2694,i1_LQ_Rweevil_c6761/f1p9/1674,i0_LQ_Rweevil_c6690/f1p0/555,i3_LQ_Rweevil_c28485/f1p0/3157	19	i4_LQ_Rweevil_c6211/f1p3/4739,i3_LQ_Rweevil_c25836/f1p0/3224,i5_LQ_Rweevil_c3661/f1p0/5446,i0_LQ_Rweevil_c25101/f1p2/863,i3_LQ_Rweevil_c15089/f1p1/3036,i3_LQ_Rweevil_c7034/f2p0/3847,i1_LQ_Rweevil_c52460/f1p0/1638,i1_LQ_Rweevil_c2608/f1p2/1548,i3_LQ_Rweevil_c11316/f1p53/3435,i2_HQ_Rweevil_c31737/f28p1/2264,i3_LQ_Rweevil_c26847/f1p1/3275,i3_LQ_Rweevil_c15181/f1p0/3061,i3_LQ_Rweevil_c2747/f1p0/3313,…
GO:0032504	multicellular organism reproduction	biological_process	0.16452	1	4	3203	19	27707	2	i0_LQ_Rweevil_c57882/f1p0/563,i1_LQ_Rweevil_c13623/f1p4/1589	2	i3_LQ_Rweevil_c9661/f1p0/3273,i5_LQ_Rweevil_c1020/f1p0/5164
GO:0006119	oxidative phosphorylation	biological_process	0.16616	1	5	3203	26	27707	5	i0_LQ_Rweevil_c33680/f1p0/515,i4_HQ_Rweevil_c1158/f4p0/4431,i5_HQ_Rweevil_c557/f2p0/5530,i4_LQ_Rweevil_c7765/f1p0/4625,i5_LQ_Rweevil_c3832/f1p6/5509	0
GO:0042773	ATP synthesis coupled electron transport	biological_process	0.16616	1	5	3203	26	27707	5	i5_LQ_Rweevil_c3832/f1p6/5509,i4_LQ_Rweevil_c7765/f1p0/4625,i5_HQ_Rweevil_c557/f2p0/5530,i4_HQ_Rweevil_c1158/f4p0/4431,i0_LQ_Rweevil_c33680/f1p0/515	0
GO:0022613	ribonucleoprotein complex biogenesis	biological_process	0.16679	1	22	3203	154	27707	8	i8_HQ_Rweevil_c15/f2p0/8531,i3_LQ_Rweevil_c35995/f1p0/3092,i1_LQ_Rweevil_c41686/f1p0/1542,i1_LQ_Rweevil_c71593/f1p0/1725,i3_LQ_Rweevil_c27338/f1p0/3657,i1_HQ_Rweevil_c14225/f2p0/1191,i3_HQ_Rweevil_c1268/f4p0/3447,i4_LQ_Rweevil_c9189/f1p0/4565	14	i1_LQ_Rweevil_c130452/f1p0/1091,i2_LQ_Rweevil_c23450/f1p5/2669,i0_HQ_Rweevil_c15261/f3p0/917,i3_HQ_Rweevil_c2031/f2p0/3498,i2_LQ_Rweevil_c85150/f1p6/2680,i2_HQ_Rweevil_c73812/f71p8/2921,i1_LQ_Rweevil_c67236/f1p0/1596,i2_LQ_Rweevil_c82722/f1p0/2507,i2_HQ_Rweevil_c146770/f114p6/2599,i2_LQ_Rweevil_c116774/f1p1/2668,i2_LQ_Rweevil_c39495/f1p2/2629,i2_LQ_Rweevil_c84030/f1p25/2927,i3_LQ_Rweevil_c35778/f…
GO:0042254	ribosome biogenesis	biological_process	0.16914	1	19	3203	131	27707	7	i1_LQ_Rweevil_c71593/f1p0/1725,i3_LQ_Rweevil_c35995/f1p0/3092,i8_HQ_Rweevil_c15/f2p0/8531,i1_LQ_Rweevil_c41686/f1p0/1542,i4_LQ_Rweevil_c9189/f1p0/4565,i3_HQ_Rweevil_c1268/f4p0/3447,i1_HQ_Rweevil_c14225/f2p0/1191	12	i0_HQ_Rweevil_c15261/f3p0/917,i1_LQ_Rweevil_c130452/f1p0/1091,i2_LQ_Rweevil_c23450/f1p5/2669,i2_LQ_Rweevil_c39495/f1p2/2629,i2_LQ_Rweevil_c84030/f1p25/2927,i3_LQ_Rweevil_c35778/f1p5/3122,i2_LQ_Rweevil_c22287/f1p4/2889,i2_LQ_Rweevil_c82722/f1p0/2507,i2_LQ_Rweevil_c85150/f1p6/2680,i3_HQ_Rweevil_c2031/f2p0/3498,i2_LQ_Rweevil_c116774/f1p1/2668,i2_HQ_Rweevil_c146770/f114p6/2599
GO:0008236	serine-type peptidase activity	molecular_function	0.17083	1	64	3203	493	27707	20	i2_HQ_Rweevil_c44054/f6p2/2732,i2_LQ_Rweevil_c103762/f1p0/2407,i3_LQ_Rweevil_c5871/f1p0/3578,i2_LQ_Rweevil_c82366/f1p8/2482,i3_LQ_Rweevil_c20544/f1p0/3254,i0_LQ_Rweevil_c13562/f1p0/955,i3_LQ_Rweevil_c36180/f1p117/3111,i1_HQ_Rweevil_c2178/f8p4/1777,i1_HQ_Rweevil_c1746/f11p6/1839,i6_LQ_Rweevil_c606/f1p0/6968,i7_LQ_Rweevil_c551/f1p0/7327,i3_LQ_Rweevil_c13845/f1p0/3080,i4_LQ_Rweevil_c10657/f1p2/4801,…	44	i1_HQ_Rweevil_c3295/f7p0/1542,i1_LQ_Rweevil_c8362/f1p0/1788,i1_LQ_Rweevil_c71682/f1p0/1951,i4_LQ_Rweevil_c9033/f1p1/4584,i2_LQ_Rweevil_c84575/f1p17/2603,i3_LQ_Rweevil_c26893/f1p0/3206,i1_LQ_Rweevil_c30339/f1p0/1320,i4_LQ_Rweevil_c12191/f1p0/4455,i3_HQ_Rweevil_c17663/f2p3/3784,i2_LQ_Rweevil_c147608/f5p1/2289,i2_HQ_Rweevil_c146589/f4p3/2576,i2_HQ_Rweevil_c1770/f16p10/2812,i2_LQ_Rweevil_c94407/f1p10…
GO:0017171	serine hydrolase activity	molecular_function	0.17083	1	64	3203	493	27707	20	i3_LQ_Rweevil_c5871/f1p0/3578,i2_LQ_Rweevil_c82366/f1p8/2482,i3_LQ_Rweevil_c20544/f1p0/3254,i3_LQ_Rweevil_c36180/f1p117/3111,i0_LQ_Rweevil_c13562/f1p0/955,i2_HQ_Rweevil_c44054/f6p2/2732,i2_LQ_Rweevil_c103762/f1p0/2407,i6_LQ_Rweevil_c606/f1p0/6968,i7_LQ_Rweevil_c551/f1p0/7327,i3_LQ_Rweevil_c13845/f1p0/3080,i1_HQ_Rweevil_c2178/f8p4/1777,i1_HQ_Rweevil_c1746/f11p6/1839,i2_LQ_Rweevil_c35932/f1p0/2493,…	44	i4_LQ_Rweevil_c9033/f1p1/4584,i2_LQ_Rweevil_c84575/f1p17/2603,i1_LQ_Rweevil_c30339/f1p0/1320,i3_LQ_Rweevil_c26893/f1p0/3206,i1_HQ_Rweevil_c3295/f7p0/1542,i1_LQ_Rweevil_c8362/f1p0/1788,i1_LQ_Rweevil_c71682/f1p0/1951,i3_LQ_Rweevil_c6963/f1p0/3491,i0_LQ_Rweevil_c56265/f1p0/481,i4_LQ_Rweevil_c2697/f1p0/4990,i1_HQ_Rweevil_c64071/f5p0/1171,i3_LQ_Rweevil_c3776/f1p0/3309,i1_LQ_Rweevil_c82188/f1p5/1977,i3…
GO:0004222	metalloendopeptidase activity	molecular_function	0.17084	1	27	3203	192	27707	6	i2_HQ_Rweevil_c10283/f4p0/2471,i3_HQ_Rweevil_c1991/f2p0/3328,i3_LQ_Rweevil_c13466/f1p25/3434,i2_LQ_Rweevil_c58898/f1p0/2662,i3_LQ_Rweevil_c8473/f1p61/3346,i2_LQ_Rweevil_c86239/f1p4/2508	21	i3_HQ_Rweevil_c40854/f21p9/3218,i3_LQ_Rweevil_c36226/f1p0/3371,i5_LQ_Rweevil_c1587/f1p0/5064,i2_HQ_Rweevil_c60499/f2p18/3879,i2_LQ_Rweevil_c108752/f1p3/2143,i2_HQ_Rweevil_c146831/f12p0/2513,i1_LQ_Rweevil_c27449/f1p12/1899,i2_HQ_Rweevil_c982/f37p5/2827,i2_LQ_Rweevil_c14857/f1p1/2035,i5_LQ_Rweevil_c4712/f1p10/5263,i3_LQ_Rweevil_c8675/f1p0/3317,i3_HQ_Rweevil_c8079/f3p0/3413,i8_LQ_Rweevil_c219/f1p0/8…
GO:0005267	potassium channel activity	molecular_function	0.17091	1	5	3203	26	27707	3	i3_LQ_Rweevil_c36265/f1p0/3285,i3_LQ_Rweevil_c33769/f1p0/3187,i3_HQ_Rweevil_c1899/f3p3/3226	2	i1_LQ_Rweevil_c77054/f1p0/1592,i2_LQ_Rweevil_c59048/f1p0/2825
GO:0004930	G-protein coupled receptor activity	molecular_function	0.1723	1	28	3203	201	27707	7	i2_HQ_Rweevil_c34506/f2p1/2172,i3_LQ_Rweevil_c21450/f1p1/3357,i1_HQ_Rweevil_c11059/f2p0/1935,i3_LQ_Rweevil_c17834/f1p0/3227,i1_HQ_Rweevil_c4182/f3p3/1617,i2_LQ_Rweevil_c5289/f1p3/2973,i2_LQ_Rweevil_c135784/f1p3/2232	21	i2_LQ_Rweevil_c57740/f1p4/2724,i4_LQ_Rweevil_c6574/f1p0/4494,i2_HQ_Rweevil_c2440/f8p1/2331,i3_LQ_Rweevil_c9204/f1p0/3555,i1_LQ_Rweevil_c68499/f1p0/1678,i4_LQ_Rweevil_c5458/f1p0/4730,i2_HQ_Rweevil_c21542/f2p1/2729,i2_LQ_Rweevil_c49878/f1p4/2033,i3_LQ_Rweevil_c2474/f1p3/3951,i5_LQ_Rweevil_c4127/f1p3/5542,i0_LQ_Rweevil_c31771/f1p0/549,i1_LQ_Rweevil_c25705/f1p0/1888,i8_LQ_Rweevil_c516/f1p0/8024,i5_LQ…
GO:0005753	mitochondrial proton-transporting ATP synthase complex	cellular_component	0.17256	1	9	3203	56	27707	3	i2_HQ_Rweevil_c78235/f2p2/2278,i1_LQ_Rweevil_c34353/f1p0/1023,i6_LQ_Rweevil_c825/f1p16/6429	6	i1_LQ_Rweevil_c34927/f1p56/1047,i2_LQ_Rweevil_c87523/f1p5/2582,i2_HQ_Rweevil_c73812/f71p8/2921,i3_LQ_Rweevil_c15089/f1p1/3036,i1_HQ_Rweevil_c121140/f49p0/1116,i2_LQ_Rweevil_c108641/f1p22/2954
GO:0072511	divalent inorganic cation transport	biological_process	0.17389	1	8	3203	47	27707	6	i4_LQ_Rweevil_c4591/f1p0/4277,i1_LQ_Rweevil_c8453/f1p2/1955,i5_LQ_Rweevil_c3209/f1p0/5482,i1_LQ_Rweevil_c8309/f1p0/1805,i6_LQ_Rweevil_c1820/f1p2/6291,i6_LQ_Rweevil_c392/f1p0/6215	2	i2_HQ_Rweevil_c51491/f15p5/2116,i2_LQ_Rweevil_c112147/f1p2/2308
GO:0030258	lipid modification	biological_process	0.17453	1	6	3203	33	27707	5	i1_LQ_Rweevil_c106904/f1p31/1203,i2_LQ_Rweevil_c21501/f1p2/2308,i3_LQ_Rweevil_c23226/f1p0/3675,i4_HQ_Rweevil_c1852/f2p0/4100,i2_LQ_Rweevil_c109656/f1p3/2530	1	i1_LQ_Rweevil_c16108/f1p0/1088
GO:0051536	iron-sulfur cluster binding	molecular_function	0.17561	1	10	3203	63	27707	9	i0_HQ_Rweevil_c19924/f9p0/678,i3_LQ_Rweevil_c5913/f1p11/3957,i1_LQ_Rweevil_c42058/f1p0/1836,i1_LQ_Rweevil_c29791/f1p12/1771,i4_LQ_Rweevil_c6475/f1p0/4084,i2_LQ_Rweevil_c124475/f1p7/2045,i3_LQ_Rweevil_c18069/f1p0/3571,i0_HQ_Rweevil_c6667/f2p0/852,i4_LQ_Rweevil_c8408/f1p3/4120	1	i1_LQ_Rweevil_c103381/f1p0/1865
GO:0051540	metal cluster binding	molecular_function	0.17561	1	10	3203	63	27707	9	i0_HQ_Rweevil_c6667/f2p0/852,i3_LQ_Rweevil_c18069/f1p0/3571,i4_LQ_Rweevil_c8408/f1p3/4120,i0_HQ_Rweevil_c19924/f9p0/678,i3_LQ_Rweevil_c5913/f1p11/3957,i2_LQ_Rweevil_c124475/f1p7/2045,i1_LQ_Rweevil_c42058/f1p0/1836,i1_LQ_Rweevil_c29791/f1p12/1771,i4_LQ_Rweevil_c6475/f1p0/4084	1	i1_LQ_Rweevil_c103381/f1p0/1865
GO:0005092	GDP-dissociation inhibitor activity	molecular_function	0.17759	1	3	3203	13	27707	0		3	i1_LQ_Rweevil_c45622/f1p0/1671,i1_LQ_Rweevil_c15614/f1p0/1033,i2_LQ_Rweevil_c45279/f1p3/1962
GO:0001653	peptide receptor activity	molecular_function	0.17817	1	5	3203	26	27707	2	i2_HQ_Rweevil_c34506/f2p1/2172,i1_HQ_Rweevil_c11059/f2p0/1935	3	i2_HQ_Rweevil_c21542/f2p1/2729,i2_LQ_Rweevil_c142283/f1p2/2090,i4_LQ_Rweevil_c6574/f1p0/4494
GO:0008528	G-protein coupled peptide receptor activity	molecular_function	0.17817	1	5	3203	26	27707	2	i1_HQ_Rweevil_c11059/f2p0/1935,i2_HQ_Rweevil_c34506/f2p1/2172	3	i2_LQ_Rweevil_c142283/f1p2/2090,i2_HQ_Rweevil_c21542/f2p1/2729,i4_LQ_Rweevil_c6574/f1p0/4494
GO:0015718	monocarboxylic acid transport	biological_process	0.17869	1	4	3203	20	27707	4	i2_LQ_Rweevil_c108705/f1p2/2381,i4_LQ_Rweevil_c12015/f1p0/4394,i0_HQ_Rweevil_c989/f12p0/562,i2_LQ_Rweevil_c61004/f1p7/2613	0
GO:0003854	3-beta-hydroxy-delta5-steroid dehydrogenase activity	molecular_function	0.1799	1	10	3203	63	27707	3	i1_LQ_Rweevil_c30675/f1p0/1922,i1_LQ_Rweevil_c41584/f1p0/1719,i0_HQ_Rweevil_c553/f11p0/888	7	i2_LQ_Rweevil_c108645/f1p6/2872,i2_LQ_Rweevil_c94917/f1p6/1981,i2_HQ_Rweevil_c32609/f42p3/2072,i1_LQ_Rweevil_c44465/f1p2/1716,i1_LQ_Rweevil_c7756/f1p0/1680,i2_LQ_Rweevil_c163194/f1p6/1966,i2_LQ_Rweevil_c26312/f1p8/2200
GO:0016229	steroid dehydrogenase activity	molecular_function	0.1799	1	10	3203	63	27707	3	i0_HQ_Rweevil_c553/f11p0/888,i1_LQ_Rweevil_c41584/f1p0/1719,i1_LQ_Rweevil_c30675/f1p0/1922	7	i2_LQ_Rweevil_c26312/f1p8/2200,i2_LQ_Rweevil_c163194/f1p6/1966,i1_LQ_Rweevil_c7756/f1p0/1680,i2_HQ_Rweevil_c32609/f42p3/2072,i1_LQ_Rweevil_c44465/f1p2/1716,i2_LQ_Rweevil_c108645/f1p6/2872,i2_LQ_Rweevil_c94917/f1p6/1981
GO:0033764	steroid dehydrogenase activity, acting on the CH-OH group of donors, NAD or NADP as acceptor	molecular_function	0.1799	1	10	3203	63	27707	3	i0_HQ_Rweevil_c553/f11p0/888,i1_LQ_Rweevil_c41584/f1p0/1719,i1_LQ_Rweevil_c30675/f1p0/1922	7	i2_LQ_Rweevil_c26312/f1p8/2200,i2_LQ_Rweevil_c163194/f1p6/1966,i1_LQ_Rweevil_c7756/f1p0/1680,i2_HQ_Rweevil_c32609/f42p3/2072,i1_LQ_Rweevil_c44465/f1p2/1716,i2_LQ_Rweevil_c108645/f1p6/2872,i2_LQ_Rweevil_c94917/f1p6/1981
GO:0000226	microtubule cytoskeleton organization	biological_process	0.18073	1	26	3203	186	27707	7	i1_LQ_Rweevil_c53573/f1p0/1907,i3_LQ_Rweevil_c20957/f1p0/3522,i3_LQ_Rweevil_c39396/f1p0/3083,i3_LQ_Rweevil_c21417/f1p6/3230,i2_LQ_Rweevil_c108705/f1p2/2381,i3_LQ_Rweevil_c28485/f1p0/3157,i2_LQ_Rweevil_c61004/f1p7/2613	19	i2_LQ_Rweevil_c38367/f1p5/2852,i3_LQ_Rweevil_c19712/f1p6/3391,i3_LQ_Rweevil_c25836/f1p0/3224,i5_LQ_Rweevil_c3661/f1p0/5446,i3_LQ_Rweevil_c15089/f1p1/3036,i4_HQ_Rweevil_c877/f7p0/4503,i3_LQ_Rweevil_c11316/f1p53/3435,i3_LQ_Rweevil_c15181/f1p0/3061,i3_LQ_Rweevil_c26847/f1p1/3275,i3_LQ_Rweevil_c34058/f1p0/3086,i4_HQ_Rweevil_c1117/f4p0/4280,i2_HQ_Rweevil_c73812/f71p8/2921,i3_LQ_Rweevil_c2747/f1p0/3313…
GO:0004601	peroxidase activity	molecular_function	0.18074	1	5	3203	27	27707	0		5	i1_HQ_Rweevil_c12244/f3p6/1652,i2_LQ_Rweevil_c80810/f1p39/2718,i0_LQ_Rweevil_c14258/f1p0/759,i2_HQ_Rweevil_c11456/f3p9/2901,i2_HQ_Rweevil_c12174/f3p38/2661
GO:0044763	single-organism cellular process	biological_process	0.18098	1	904	3203	7624	27707	427	i2_LQ_Rweevil_c77628/f1p8/3057,i4_HQ_Rweevil_c1899/f2p3/4252,i2_LQ_Rweevil_c44631/f1p79/2754,i1_LQ_Rweevil_c53159/f1p0/1654,i0_LQ_Rweevil_c32571/f1p0/845,i4_HQ_Rweevil_c1852/f2p0/4100,i1_LQ_Rweevil_c50237/f1p0/1712,i2_LQ_Rweevil_c86239/f1p4/2508,i2_LQ_Rweevil_c61004/f1p7/2613,i1_LQ_Rweevil_c38182/f1p0/1626,i2_LQ_Rweevil_c87294/f1p0/2715,i1_HQ_Rweevil_c18871/f6p17/1441,i3_LQ_Rweevil_c30941/f1p0/30…	477	i4_LQ_Rweevil_c5857/f1p0/4076,i2_LQ_Rweevil_c45020/f1p3/2475,i2_LQ_Rweevil_c142283/f1p2/2090,i3_LQ_Rweevil_c24656/f1p0/3611,i2_HQ_Rweevil_c148481/f56p0/2908,i3_LQ_Rweevil_c19712/f1p6/3391,i2_HQ_Rweevil_c15406/f49p3/2777,i5_LQ_Rweevil_c847/f1p0/5387,i3_LQ_Rweevil_c3825/f1p0/3470,i4_LQ_Rweevil_c12000/f1p0/4210,i3_LQ_Rweevil_c25265/f1p0/3768,i1_LQ_Rweevil_c42611/f1p14/1940,i1_LQ_Rweevil_c105436/f1p0…
GO:0004852	uroporphyrinogen-III synthase activity	molecular_function	0.18158	1	2	3203	7	27707	2	i2_LQ_Rweevil_c15102/f1p0/2106,i1_LQ_Rweevil_c5955/f1p0/1950	0
GO:0019031	viral envelope	cellular_component	0.18162	1	43	3203	322	27707	25	i2_LQ_Rweevil_c87709/f1p0/2502,i2_LQ_Rweevil_c55798/f1p7/2348,i2_HQ_Rweevil_c2170/f2p8/2331,i4_LQ_Rweevil_c9100/f1p0/4526,i2_LQ_Rweevil_c42813/f1p13/3584,i2_HQ_Rweevil_c21274/f2p3/2707,i3_LQ_Rweevil_c10306/f1p1/3696,i4_LQ_Rweevil_c11169/f1p53/4817,i2_LQ_Rweevil_c133801/f1p1/2281,i2_LQ_Rweevil_c57653/f1p2/2602,i4_LQ_Rweevil_c3493/f1p3/4174,i3_LQ_Rweevil_c35690/f1p0/3891,i1_LQ_Rweevil_c14992/f1p10/…	18	i2_HQ_Rweevil_c81295/f2p0/2832,i2_LQ_Rweevil_c88973/f1p4/2732,i4_HQ_Rweevil_c13919/f19p0/4157,i1_HQ_Rweevil_c1232/f17p0/1930,i5_LQ_Rweevil_c4127/f1p3/5542,i2_LQ_Rweevil_c48317/f1p3/1991,i3_LQ_Rweevil_c4587/f1p0/3357,i3_HQ_Rweevil_c4425/f4p0/3348,i2_LQ_Rweevil_c27295/f1p4/2730,i3_LQ_Rweevil_c4015/f1p25/3122,i4_LQ_Rweevil_c3647/f1p11/4174,i0_LQ_Rweevil_c24653/f1p9/832,i5_LQ_Rweevil_c3840/f1p0/5104,…
GO:0036338	viral membrane	cellular_component	0.18162	1	43	3203	322	27707	25	i1_LQ_Rweevil_c7708/f1p18/1527,i3_LQ_Rweevil_c7402/f1p0/3120,i1_LQ_Rweevil_c4272/f2p0/1985,i2_LQ_Rweevil_c135861/f1p90/2653,i3_HQ_Rweevil_c17573/f2p2/3639,i2_LQ_Rweevil_c110995/f1p2/2222,i0_LQ_Rweevil_c52297/f1p0/776,i5_LQ_Rweevil_c680/f1p0/5260,i3_LQ_Rweevil_c9630/f1p5/3760,i3_HQ_Rweevil_c2055/f2p5/3829,i2_LQ_Rweevil_c63058/f1p19/2866,i3_HQ_Rweevil_c1410/f6p0/3840,i4_LQ_Rweevil_c3493/f1p3/4174,i…	18	i2_LQ_Rweevil_c57117/f1p11/2230,i3_LQ_Rweevil_c22464/f1p56/3446,i5_LQ_Rweevil_c3840/f1p0/5104,i3_HQ_Rweevil_c25428/f2p0/3288,i1_HQ_Rweevil_c84508/f5p0/1096,i2_LQ_Rweevil_c80615/f1p90/3921,i2_LQ_Rweevil_c27295/f1p4/2730,i3_HQ_Rweevil_c4425/f4p0/3348,i3_LQ_Rweevil_c4587/f1p0/3357,i4_LQ_Rweevil_c3647/f1p11/4174,i3_LQ_Rweevil_c4015/f1p25/3122,i0_LQ_Rweevil_c24653/f1p9/832,i5_LQ_Rweevil_c4127/f1p3/554…
GO:0003951	NAD+ kinase activity	molecular_function	0.18272	1	3	3203	13	27707	3	i2_LQ_Rweevil_c2998/f1p3/2300,i2_LQ_Rweevil_c131140/f1p3/2327,i1_HQ_Rweevil_c1913/f4p0/1852	0
GO:0006741	NADP biosynthetic process	biological_process	0.18272	1	3	3203	13	27707	3	i1_HQ_Rweevil_c1913/f4p0/1852,i2_LQ_Rweevil_c131140/f1p3/2327,i2_LQ_Rweevil_c2998/f1p3/2300	0
GO:0051287	NAD binding	molecular_function	0.18488	1	33	3203	243	27707	17	i1_HQ_Rweevil_c20209/f2p0/1783,i1_LQ_Rweevil_c65508/f1p0/1426,i2_LQ_Rweevil_c10100/f1p8/2264,i2_HQ_Rweevil_c148702/f105p8/2248,i3_LQ_Rweevil_c11756/f1p0/3212,i2_LQ_Rweevil_c164541/f1p10/2003,i4_LQ_Rweevil_c10031/f1p0/4585,i2_HQ_Rweevil_c127409/f23p5/2284,i3_HQ_Rweevil_c4085/f2p0/3271,i2_LQ_Rweevil_c25850/f1p4/2538,i1_HQ_Rweevil_c25193/f2p0/1432,i1_HQ_Rweevil_c141117/f3p0/1678,i2_LQ_Rweevil_c12555…	16	i1_LQ_Rweevil_c7756/f1p0/1680,i4_LQ_Rweevil_c4465/f1p4/4835,i2_LQ_Rweevil_c86242/f1p75/2276,i1_HQ_Rweevil_c52526/f2p0/1825,i1_LQ_Rweevil_c26791/f1p17/1803,i1_LQ_Rweevil_c6276/f1p0/1731,i1_LQ_Rweevil_c5140/f4p8/1500,i2_LQ_Rweevil_c108645/f1p6/2872,i2_LQ_Rweevil_c50015/f1p1/2112,i3_HQ_Rweevil_c1440/f7p0/3196,i3_LQ_Rweevil_c25589/f1p0/3141,i2_LQ_Rweevil_c94917/f1p6/1981,i2_HQ_Rweevil_c51365/f18p5/22…
GO:0032403	protein complex binding	molecular_function	0.18495	1	74	3203	574	27707	28	i1_LQ_Rweevil_c67077/f1p0/1989,i4_LQ_Rweevil_c12972/f1p60/4077,i2_LQ_Rweevil_c109811/f1p22/2985,i3_LQ_Rweevil_c19706/f1p0/3069,i2_LQ_Rweevil_c55224/f1p4/2604,i4_LQ_Rweevil_c4177/f1p1/4420,i3_LQ_Rweevil_c5680/f1p0/3407,i2_LQ_Rweevil_c155015/f1p6/2694,i2_LQ_Rweevil_c98680/f1p11/2728,i9_LQ_Rweevil_c65/f1p0/9271,i3_LQ_Rweevil_c24250/f1p0/3313,i6_LQ_Rweevil_c1852/f1p0/6241,i2_LQ_Rweevil_c58365/f1p10/1…	46	i2_LQ_Rweevil_c31521/f1p17/2037,i3_LQ_Rweevil_c34705/f1p0/3181,i1_LQ_Rweevil_c43311/f1p0/1185,i3_LQ_Rweevil_c18218/f1p0/3069,i2_LQ_Rweevil_c43263/f2p0/2838,i1_LQ_Rweevil_c14490/f2p0/1555,i4_HQ_Rweevil_c877/f7p0/4503,i2_HQ_Rweevil_c11146/f2p0/2776,i3_LQ_Rweevil_c8616/f1p11/3465,i2_LQ_Rweevil_c109220/f1p20/2862,i1_LQ_Rweevil_c41884/f1p1/1284,i1_LQ_Rweevil_c122058/f1p0/1120,i2_LQ_Rweevil_c25892/f1p5…
GO:0008839	4-hydroxy-tetrahydrodipicolinate reductase	molecular_function	0.18534	1	2	3203	7	27707	0		2	i3_HQ_Rweevil_c1440/f7p0/3196,i3_LQ_Rweevil_c25589/f1p0/3141
GO:0009085	lysine biosynthetic process	biological_process	0.18534	1	2	3203	7	27707	0		2	i3_HQ_Rweevil_c1440/f7p0/3196,i3_LQ_Rweevil_c25589/f1p0/3141
GO:0009089	lysine biosynthetic process via diaminopimelate	biological_process	0.18534	1	2	3203	7	27707	0		2	i3_HQ_Rweevil_c1440/f7p0/3196,i3_LQ_Rweevil_c25589/f1p0/3141
GO:0046451	diaminopimelate metabolic process	biological_process	0.18534	1	2	3203	7	27707	0		2	i3_HQ_Rweevil_c1440/f7p0/3196,i3_LQ_Rweevil_c25589/f1p0/3141
GO:0004175	endopeptidase activity	molecular_function	0.18602	1	103	3203	821	27707	32	i1_HQ_Rweevil_c15967/f3p0/1151,i4_LQ_Rweevil_c14100/f1p4/4526,i1_LQ_Rweevil_c30819/f1p9/1646,i4_LQ_Rweevil_c10657/f1p2/4801,i3_LQ_Rweevil_c8473/f1p61/3346,i0_LQ_Rweevil_c35763/f1p0/856,i2_LQ_Rweevil_c94128/f1p2/2098,i2_LQ_Rweevil_c109368/f1p88/2860,i2_LQ_Rweevil_c35325/f1p0/2677,i3_LQ_Rweevil_c22682/f1p0/3878,i2_LQ_Rweevil_c149921/f1p4/2491,i3_LQ_Rweevil_c5871/f1p0/3578,i2_HQ_Rweevil_c10283/f4p0/…	71	i1_HQ_Rweevil_c918/f26p0/1844,i2_HQ_Rweevil_c31527/f2p5/2141,i5_LQ_Rweevil_c1587/f1p0/5064,i2_HQ_Rweevil_c60499/f2p18/3879,i1_LQ_Rweevil_c4550/f1p4/1686,i8_LQ_Rweevil_c152/f1p0/8311,i3_HQ_Rweevil_c40793/f26p0/3200,i2_HQ_Rweevil_c28494/f29p1/2077,i1_LQ_Rweevil_c76283/f1p0/1738,i1_HQ_Rweevil_c121309/f43p0/1408,i1_HQ_Rweevil_c12995/f2p3/1350,i3_HQ_Rweevil_c8079/f3p0/3413,i2_LQ_Rweevil_c88611/f1p1/21…
GO:0001906	cell killing	biological_process	0.18604	1	3	3203	13	27707	2	i2_HQ_Rweevil_c91620/f2p0/2057,i2_HQ_Rweevil_c60720/f3p2/2422	1	i3_LQ_Rweevil_c5174/f1p6/3852
GO:0003873	6-phosphofructo-2-kinase activity	molecular_function	0.1863	1	7	3203	41	27707	4	i4_LQ_Rweevil_c11472/f1p13/4852,i2_HQ_Rweevil_c47130/f2p5/2099,i2_HQ_Rweevil_c52133/f4p4/2143,i1_HQ_Rweevil_c17272/f8p0/1863	3	i4_LQ_Rweevil_c6874/f1p0/4695,i1_LQ_Rweevil_c122058/f1p0/1120,i3_LQ_Rweevil_c22082/f1p0/3068
GO:0006000	fructose metabolic process	biological_process	0.1863	1	7	3203	41	27707	4	i4_LQ_Rweevil_c11472/f1p13/4852,i2_HQ_Rweevil_c47130/f2p5/2099,i2_HQ_Rweevil_c52133/f4p4/2143,i1_HQ_Rweevil_c17272/f8p0/1863	3	i4_LQ_Rweevil_c6874/f1p0/4695,i1_LQ_Rweevil_c122058/f1p0/1120,i3_LQ_Rweevil_c22082/f1p0/3068
GO:0050795	regulation of behavior	biological_process	0.18839	1	2	3203	7	27707	1	i1_LQ_Rweevil_c4940/f1p0/1795	1	i2_HQ_Rweevil_c147752/f24p21/2935
GO:0050920	regulation of chemotaxis	biological_process	0.18839	1	2	3203	7	27707	1	i1_LQ_Rweevil_c4940/f1p0/1795	1	i2_HQ_Rweevil_c147752/f24p21/2935
GO:0016255	attachment of GPI anchor to protein	biological_process	0.18903	1	2	3203	7	27707	0		2	i2_LQ_Rweevil_c65535/f1p0/2358,i2_HQ_Rweevil_c117871/f4p2/2084
GO:0015074	DNA integration	biological_process	0.18949	1	8	3203	48	27707	7	i4_LQ_Rweevil_c2653/f1p0/5028,i7_LQ_Rweevil_c513/f1p0/7509,i3_LQ_Rweevil_c22924/f1p0/3519,i2_LQ_Rweevil_c59386/f1p50/2216,i5_LQ_Rweevil_c4125/f1p0/5392,i2_LQ_Rweevil_c13020/f1p2/2593,i2_LQ_Rweevil_c87294/f1p0/2715	1	i1_HQ_Rweevil_c1825/f3p0/1749
GO:0016055	Wnt signaling pathway	biological_process	0.18952	1	8	3203	48	27707	4	i3_HQ_Rweevil_c8030/f3p0/3179,i1_LQ_Rweevil_c53159/f1p0/1654,i1_LQ_Rweevil_c12419/f1p1/1724,i1_HQ_Rweevil_c35180/f2p0/1511	4	i2_LQ_Rweevil_c39657/f1p0/2134,i2_LQ_Rweevil_c61519/f1p0/2169,i1_LQ_Rweevil_c77191/f1p3/1206,i2_HQ_Rweevil_c146600/f6p6/2813
GO:0005788	endoplasmic reticulum lumen	cellular_component	0.19071	1	2	3203	7	27707	0		2	i2_LQ_Rweevil_c119152/f1p16/1930,i2_HQ_Rweevil_c139139/f3p18/2108
GO:0007172	signal complex assembly	biological_process	0.19097	1	3	3203	13	27707	1	i3_LQ_Rweevil_c17981/f1p0/3426	2	i5_LQ_Rweevil_c4840/f1p0/5026,i5_LQ_Rweevil_c3840/f1p0/5104
GO:0016994	precorrin-6A reductase activity	molecular_function	0.19111	1	2	3203	7	27707	2	i2_LQ_Rweevil_c104958/f1p10/2300,i2_HQ_Rweevil_c36014/f4p25/2315	0
GO:0001101	response to acid chemical	biological_process	0.19127	1	2	3203	7	27707	2	i5_LQ_Rweevil_c1565/f1p1/5949,i7_LQ_Rweevil_c707/f1p0/7991	0
GO:0030054	cell junction	cellular_component	0.1925	1	7	3203	41	27707	2	i2_LQ_Rweevil_c58365/f1p10/1997,i3_LQ_Rweevil_c17981/f1p0/3426	5	i4_LQ_Rweevil_c7960/f1p0/4742,i2_LQ_Rweevil_c50246/f1p17/2027,i5_LQ_Rweevil_c4840/f1p0/5026,i5_LQ_Rweevil_c3840/f1p0/5104,i1_HQ_Rweevil_c51080/f3p0/1980
GO:0019049	evasion or tolerance of host defenses by virus	biological_process	0.19255	1	2	3203	7	27707	2	i3_HQ_Rweevil_c5040/f2p0/3247,i2_LQ_Rweevil_c55603/f1p2/2956	0
GO:0002682	regulation of immune system process	biological_process	0.19417	1	5	3203	27	27707	4	i2_LQ_Rweevil_c59920/f1p1/2934,i1_LQ_Rweevil_c10445/f1p0/1939,i2_LQ_Rweevil_c24541/f1p3/2342,i1_LQ_Rweevil_c12972/f1p60/1762	1	i3_LQ_Rweevil_c19966/f1p0/3112
GO:0016769	transferase activity, transferring nitrogenous groups	molecular_function	0.19486	1	4	3203	20	27707	2	i2_LQ_Rweevil_c109928/f1p6/2715,i1_LQ_Rweevil_c50912/f1p0/1656	2	i1_HQ_Rweevil_c39806/f8p0/1666,i1_LQ_Rweevil_c12364/f1p5/1703
GO:0046912	transferase activity, transferring acyl groups, acyl groups converted into alkyl on transfer	molecular_function	0.19672	1	4	3203	20	27707	2	i2_LQ_Rweevil_c38825/f1p19/1909,i1_LQ_Rweevil_c41936/f1p0/1819	2	i3_HQ_Rweevil_c2300/f2p10/3655,i2_LQ_Rweevil_c98093/f1p3/1910
GO:0001503	ossification	biological_process	0.19998	1	3	3203	14	27707	2	i2_HQ_Rweevil_c147837/f3p5/2250,i2_LQ_Rweevil_c14795/f1p4/2163	1	i3_LQ_Rweevil_c7034/f2p0/3847
GO:0004866	endopeptidase inhibitor activity	molecular_function	0.2006	1	16	3203	110	27707	10	i4_LQ_Rweevil_c2195/f1p1/4821,i4_LQ_Rweevil_c8892/f1p11/4356,i0_LQ_Rweevil_c26220/f1p0/412,i3_LQ_Rweevil_c26061/f1p0/3179,i4_LQ_Rweevil_c11938/f1p0/4777,i4_HQ_Rweevil_c1584/f2p0/4697,i0_HQ_Rweevil_c61272/f2p1/408,i0_LQ_Rweevil_c3351/f1p0/787,i3_LQ_Rweevil_c8041/f1p0/3614,i4_LQ_Rweevil_c4880/f1p1/4594	6	i4_LQ_Rweevil_c9293/f1p0/4538,i8_LQ_Rweevil_c42/f1p0/8938,i8_LQ_Rweevil_c219/f1p0/8426,i4_LQ_Rweevil_c9973/f1p2/4325,i2_LQ_Rweevil_c104665/f1p0/2774,i3_HQ_Rweevil_c40346/f5p0/3129
GO:0061135	endopeptidase regulator activity	molecular_function	0.2006	1	16	3203	110	27707	10	i3_LQ_Rweevil_c26061/f1p0/3179,i4_LQ_Rweevil_c11938/f1p0/4777,i3_LQ_Rweevil_c8041/f1p0/3614,i0_HQ_Rweevil_c61272/f2p1/408,i4_HQ_Rweevil_c1584/f2p0/4697,i0_LQ_Rweevil_c3351/f1p0/787,i4_LQ_Rweevil_c2195/f1p1/4821,i0_LQ_Rweevil_c26220/f1p0/412,i4_LQ_Rweevil_c8892/f1p11/4356,i4_LQ_Rweevil_c4880/f1p1/4594	6	i8_LQ_Rweevil_c219/f1p0/8426,i4_LQ_Rweevil_c9973/f1p2/4325,i8_LQ_Rweevil_c42/f1p0/8938,i4_LQ_Rweevil_c9293/f1p0/4538,i3_HQ_Rweevil_c40346/f5p0/3129,i2_LQ_Rweevil_c104665/f1p0/2774
GO:0048468	cell development	biological_process	0.20342	1	8	3203	50	27707	3	i4_LQ_Rweevil_c6428/f1p4/4685,i0_LQ_Rweevil_c57882/f1p0/563,i5_LQ_Rweevil_c1531/f1p3/5630	5	i4_LQ_Rweevil_c7155/f1p0/4814,i5_LQ_Rweevil_c1020/f1p0/5164,i2_LQ_Rweevil_c54741/f1p0/2711,i1_LQ_Rweevil_c28081/f1p0/1942,i4_LQ_Rweevil_c13321/f1p11/4042
GO:0015085	calcium ion transmembrane transporter activity	molecular_function	0.20412	1	14	3203	95	27707	10	i4_LQ_Rweevil_c4591/f1p0/4277,i4_HQ_Rweevil_c1587/f2p0/4333,i2_LQ_Rweevil_c56369/f1p8/2079,i1_LQ_Rweevil_c8453/f1p2/1955,i1_LQ_Rweevil_c8309/f1p0/1805,i1_LQ_Rweevil_c30819/f1p9/1646,i5_LQ_Rweevil_c3209/f1p0/5482,i6_LQ_Rweevil_c392/f1p0/6215,i0_LQ_Rweevil_c10200/f1p12/710,i6_LQ_Rweevil_c1820/f1p2/6291	4	i0_HQ_Rweevil_c1204/f6p3/814,i3_LQ_Rweevil_c7034/f2p0/3847,i3_LQ_Rweevil_c28153/f1p2/3976,i2_HQ_Rweevil_c51491/f15p5/2116
GO:0070840	dynein complex binding	molecular_function	0.20466	1	24	3203	173	27707	13	i3_LQ_Rweevil_c6953/f1p0/3151,i2_LQ_Rweevil_c55224/f1p4/2604,i4_LQ_Rweevil_c8154/f1p0/4809,i4_LQ_Rweevil_c4177/f1p1/4420,i1_LQ_Rweevil_c48518/f1p0/1916,i3_LQ_Rweevil_c8534/f1p5/3661,i1_LQ_Rweevil_c50155/f1p1/1754,i3_LQ_Rweevil_c24250/f1p0/3313,i3_LQ_Rweevil_c4988/f1p0/3263,i4_HQ_Rweevil_c1899/f2p3/4252,i2_LQ_Rweevil_c155015/f1p6/2694,i1_LQ_Rweevil_c67077/f1p0/1989,i5_LQ_Rweevil_c1823/f1p0/5203	11	i2_HQ_Rweevil_c11146/f2p0/2776,i3_HQ_Rweevil_c31743/f11p0/3123,i5_LQ_Rweevil_c4662/f1p0/5091,i2_LQ_Rweevil_c43263/f2p0/2838,i2_LQ_Rweevil_c109206/f1p7/2679,i1_LQ_Rweevil_c43311/f1p0/1185,i2_LQ_Rweevil_c31521/f1p17/2037,i3_LQ_Rweevil_c5647/f1p0/3916,i2_HQ_Rweevil_c2548/f5p6/2424,i3_LQ_Rweevil_c27717/f1p0/3741,i3_LQ_Rweevil_c43158/f1p0/3009
GO:0016151	nickel cation binding	molecular_function	0.20701	1	14	3203	95	27707	3	i2_LQ_Rweevil_c56673/f1p0/2313,i1_LQ_Rweevil_c22815/f2p0/1947,i2_LQ_Rweevil_c111399/f1p3/1659	11	i3_LQ_Rweevil_c14935/f1p0/3044,i2_HQ_Rweevil_c118040/f3p3/2072,i1_HQ_Rweevil_c1994/f10p0/1906,i2_LQ_Rweevil_c65376/f1p3/2228,i3_HQ_Rweevil_c1520/f5p5/3162,i4_LQ_Rweevil_c9318/f1p1/4453,i2_LQ_Rweevil_c88182/f1p14/2130,i7_LQ_Rweevil_c342/f1p0/7454,i1_HQ_Rweevil_c6283/f3p0/1763,i3_HQ_Rweevil_c17669/f2p4/3889,i3_LQ_Rweevil_c22037/f1p0/3152
GO:0030317	sperm motility	biological_process	0.2079	1	1	3203	2	27707	0		1	i0_LQ_Rweevil_c15452/f1p0/544
GO:1901317	regulation of sperm motility	biological_process	0.2079	1	1	3203	2	27707	0		1	i0_LQ_Rweevil_c15452/f1p0/544
GO:1901318	negative regulation of sperm motility	biological_process	0.2079	1	1	3203	2	27707	0		1	i0_LQ_Rweevil_c15452/f1p0/544
GO:0044264	cellular polysaccharide metabolic process	biological_process	0.20838	1	8	3203	50	27707	2	i2_LQ_Rweevil_c9947/f1p8/2889,i2_HQ_Rweevil_c34506/f2p1/2172	6	i2_HQ_Rweevil_c47113/f2p13/2048,i2_LQ_Rweevil_c49875/f1p14/2095,i2_LQ_Rweevil_c110094/f1p13/2480,i2_HQ_Rweevil_c99536/f30p7/2798,i2_LQ_Rweevil_c29757/f1p13/2068,i2_LQ_Rweevil_c69977/f1p13/2074
GO:0018196	peptidyl-asparagine modification	biological_process	0.21192	1	1	3203	2	27707	0		1	i1_LQ_Rweevil_c68097/f1p0/1836
GO:0018279	protein N-linked glycosylation via asparagine	biological_process	0.21192	1	1	3203	2	27707	0		1	i1_LQ_Rweevil_c68097/f1p0/1836
GO:0044459	plasma membrane part	cellular_component	0.21314	1	20	3203	144	27707	11	i4_LQ_Rweevil_c4591/f1p0/4277,i6_LQ_Rweevil_c1820/f1p2/6291,i6_LQ_Rweevil_c392/f1p0/6215,i1_LQ_Rweevil_c8309/f1p0/1805,i1_LQ_Rweevil_c67716/f1p0/1675,i1_LQ_Rweevil_c8453/f1p2/1955,i3_LQ_Rweevil_c13254/f1p0/3378,i2_HQ_Rweevil_c34506/f2p1/2172,i1_LQ_Rweevil_c91770/f1p0/1061,i2_LQ_Rweevil_c57653/f1p2/2602,i5_LQ_Rweevil_c3209/f1p0/5482	9	i6_LQ_Rweevil_c1261/f1p0/6409,i4_LQ_Rweevil_c5122/f1p0/4699,i4_LQ_Rweevil_c8501/f1p0/4626,i1_LQ_Rweevil_c28081/f1p0/1942,i5_LQ_Rweevil_c5160/f1p0/5009,i2_HQ_Rweevil_c51491/f15p5/2116,i6_LQ_Rweevil_c822/f1p0/6346,i4_HQ_Rweevil_c744/f9p0/4431,i4_HQ_Rweevil_c630/f11p0/4888
GO:0000272	polysaccharide catabolic process	biological_process	0.2132	1	6	3203	35	27707	0		6	i2_LQ_Rweevil_c110094/f1p13/2480,i2_LQ_Rweevil_c29757/f1p13/2068,i2_LQ_Rweevil_c69977/f1p13/2074,i2_LQ_Rweevil_c49875/f1p14/2095,i2_HQ_Rweevil_c47113/f2p13/2048,i2_LQ_Rweevil_c38010/f1p4/2512
GO:0004733	pyridoxamine-phosphate oxidase activity	molecular_function	0.21405	1	2	3203	8	27707	2	i1_LQ_Rweevil_c44920/f1p0/1240,i1_LQ_Rweevil_c54212/f1p4/1592	0
GO:0005740	mitochondrial envelope	cellular_component	0.21488	1	38	3203	293	27707	20	i4_LQ_Rweevil_c11169/f1p53/4817,i6_LQ_Rweevil_c825/f1p16/6429,i0_HQ_Rweevil_c1230/f6p0/455,i0_LQ_Rweevil_c3572/f1p0/757,i2_HQ_Rweevil_c78235/f2p2/2278,i2_LQ_Rweevil_c42813/f1p13/3584,i3_HQ_Rweevil_c17573/f2p2/3639,i1_LQ_Rweevil_c22697/f1p0/1478,i0_HQ_Rweevil_c21555/f2p20/734,i1_LQ_Rweevil_c34353/f1p0/1023,i0_HQ_Rweevil_c71790/f5p0/583,i1_LQ_Rweevil_c5987/f1p0/1730,i2_LQ_Rweevil_c113912/f1p0/2361,…	18	i4_LQ_Rweevil_c10272/f1p0/4664,i2_HQ_Rweevil_c73812/f71p8/2921,i2_LQ_Rweevil_c88973/f1p4/2732,i3_HQ_Rweevil_c1882/f5p0/3217,i6_LQ_Rweevil_c2231/f1p0/6028,i1_HQ_Rweevil_c121140/f49p0/1116,i2_LQ_Rweevil_c108641/f1p22/2954,i1_HQ_Rweevil_c37687/f25p0/1373,i4_LQ_Rweevil_c2651/f1p2/4977,i2_LQ_Rweevil_c64540/f1p5/2820,i2_LQ_Rweevil_c87523/f1p5/2582,i3_LQ_Rweevil_c28594/f1p0/3183,i3_LQ_Rweevil_c15089/f1p…
GO:0007517	muscle organ development	biological_process	0.21568	1	1	3203	2	27707	1	i3_LQ_Rweevil_c12265/f1p37/3295	0
GO:0061061	muscle structure development	biological_process	0.21568	1	1	3203	2	27707	1	i3_LQ_Rweevil_c12265/f1p37/3295	0
GO:0005783	endoplasmic reticulum	cellular_component	0.21572	1	35	3203	266	27707	13	i2_LQ_Rweevil_c57464/f1p25/2964,i4_LQ_Rweevil_c7825/f1p6/4210,i2_LQ_Rweevil_c88404/f1p2/2427,i3_LQ_Rweevil_c6096/f1p0/3463,i7_LQ_Rweevil_c551/f1p0/7327,i2_LQ_Rweevil_c14795/f1p4/2163,i5_LQ_Rweevil_c2078/f1p3/5390,i2_LQ_Rweevil_c55224/f1p4/2604,i2_HQ_Rweevil_c147837/f3p5/2250,i2_LQ_Rweevil_c49795/f1p3/2055,i5_LQ_Rweevil_c4622/f1p0/5571,i2_LQ_Rweevil_c86727/f1p3/2613,i2_LQ_Rweevil_c60831/f1p216/2225	22	i0_LQ_Rweevil_c52386/f1p0/778,i3_LQ_Rweevil_c12603/f1p0/3377,i2_LQ_Rweevil_c60986/f1p0/2940,i1_LQ_Rweevil_c48436/f1p0/1994,i2_LQ_Rweevil_c62889/f1p5/2119,i1_LQ_Rweevil_c121769/f1p6/1602,i0_LQ_Rweevil_c13492/f1p23/683,i4_LQ_Rweevil_c12104/f1p4/4798,i1_LQ_Rweevil_c68097/f1p0/1836,i2_LQ_Rweevil_c62366/f1p0/2241,i1_LQ_Rweevil_c2831/f1p9/1646,i2_LQ_Rweevil_c132055/f1p4/2478,i2_LQ_Rweevil_c95933/f1p3/2…
GO:0007268	synaptic transmission	biological_process	0.21628	1	5	3203	28	27707	1	i4_LQ_Rweevil_c8354/f1p9/4855	4	i2_HQ_Rweevil_c41479/f2p4/2876,i3_HQ_Rweevil_c1520/f5p5/3162,i3_HQ_Rweevil_c40793/f26p0/3200,i0_LQ_Rweevil_c22873/f1p0/943
GO:0072525	pyridine-containing compound biosynthetic process	biological_process	0.21631	1	4	3203	21	27707	3	i2_LQ_Rweevil_c2998/f1p3/2300,i1_HQ_Rweevil_c1913/f4p0/1852,i2_LQ_Rweevil_c131140/f1p3/2327	1	i1_HQ_Rweevil_c13339/f3p12/1798
GO:0003779	actin binding	molecular_function	0.21767	1	30	3203	223	27707	14	i2_LQ_Rweevil_c58365/f1p10/1997,i3_LQ_Rweevil_c11718/f1p0/3979,i2_LQ_Rweevil_c163445/f1p3/2010,i5_LQ_Rweevil_c4702/f1p11/5793,i1_HQ_Rweevil_c19225/f2p0/1891,i1_HQ_Rweevil_c43819/f2p0/1587,i2_LQ_Rweevil_c38382/f1p2/2169,i2_LQ_Rweevil_c30135/f1p3/2050,i1_LQ_Rweevil_c8817/f1p0/1693,i9_LQ_Rweevil_c65/f1p0/9271,i2_HQ_Rweevil_c6338/f2p14/2714,i1_LQ_Rweevil_c8245/f1p32/1805,i2_LQ_Rweevil_c37529/f1p10/23…	16	i4_HQ_Rweevil_c877/f7p0/4503,i4_LQ_Rweevil_c2451/f1p0/4298,i4_LQ_Rweevil_c10272/f1p0/4664,i2_LQ_Rweevil_c20536/f1p2/2411,i0_HQ_Rweevil_c72347/f44p0/931,i1_HQ_Rweevil_c1288/f30p0/1636,i3_HQ_Rweevil_c40313/f44p0/3467,i3_LQ_Rweevil_c12706/f1p0/3088,i2_LQ_Rweevil_c43263/f2p0/2838,i1_LQ_Rweevil_c6880/f1p0/1905,i0_HQ_Rweevil_c11851/f2p0/639,i2_HQ_Rweevil_c2245/f3p4/2914,i2_LQ_Rweevil_c43698/f1p9/2661,i…
GO:0072509	divalent inorganic cation transmembrane transporter activity	molecular_function	0.21779	1	15	3203	104	27707	10	i1_LQ_Rweevil_c8453/f1p2/1955,i2_LQ_Rweevil_c56369/f1p8/2079,i4_HQ_Rweevil_c1587/f2p0/4333,i4_LQ_Rweevil_c4591/f1p0/4277,i6_LQ_Rweevil_c1820/f1p2/6291,i6_LQ_Rweevil_c392/f1p0/6215,i0_LQ_Rweevil_c10200/f1p12/710,i1_LQ_Rweevil_c30819/f1p9/1646,i5_LQ_Rweevil_c3209/f1p0/5482,i1_LQ_Rweevil_c8309/f1p0/1805	5	i3_LQ_Rweevil_c28153/f1p2/3976,i3_LQ_Rweevil_c7034/f2p0/3847,i0_HQ_Rweevil_c1204/f6p3/814,i2_LQ_Rweevil_c112147/f1p2/2308,i2_HQ_Rweevil_c51491/f15p5/2116
GO:0016459	myosin complex	cellular_component	0.21818	1	37	3203	277	27707	27	i3_LQ_Rweevil_c28239/f1p0/3371,i2_LQ_Rweevil_c44631/f1p79/2754,i8_LQ_Rweevil_c270/f1p0/8923,i1_LQ_Rweevil_c30154/f1p0/1691,i11_LQ_Rweevil_c27/f1p0/11096,i2_LQ_Rweevil_c5064/f1p14/2218,i7_LQ_Rweevil_c975/f1p0/7107,i4_LQ_Rweevil_c6287/f1p2/4650,i2_LQ_Rweevil_c36307/f1p17/2632,i3_LQ_Rweevil_c26367/f1p3/3224,i1_LQ_Rweevil_c53573/f1p0/1907,i6_HQ_Rweevil_c46/f7p0/6441,i3_LQ_Rweevil_c22924/f1p0/3519,i3_…	10	i2_LQ_Rweevil_c6351/f1p23/2934,i2_LQ_Rweevil_c108261/f1p2/2820,i3_HQ_Rweevil_c38091/f2p0/2993,i6_LQ_Rweevil_c571/f1p0/6118,i3_HQ_Rweevil_c17415/f2p0/3076,i6_LQ_Rweevil_c939/f1p0/6709,i7_LQ_Rweevil_c755/f1p0/7209,i3_LQ_Rweevil_c9525/f1p0/3755,i2_HQ_Rweevil_c147752/f24p21/2935,i2_LQ_Rweevil_c3153/f1p20/2545
GO:0000724	double-strand break repair via homologous recombination	biological_process	0.21833	1	1	3203	2	27707	1	i1_LQ_Rweevil_c22134/f1p0/1884	0
GO:0000725	recombinational repair	biological_process	0.21833	1	1	3203	2	27707	1	i1_LQ_Rweevil_c22134/f1p0/1884	0
GO:0006694	steroid biosynthetic process	biological_process	0.21851	1	10	3203	66	27707	3	i0_HQ_Rweevil_c553/f11p0/888,i1_LQ_Rweevil_c30675/f1p0/1922,i1_LQ_Rweevil_c41584/f1p0/1719	7	i1_LQ_Rweevil_c7756/f1p0/1680,i2_LQ_Rweevil_c163194/f1p6/1966,i2_LQ_Rweevil_c26312/f1p8/2200,i2_LQ_Rweevil_c94917/f1p6/1981,i2_LQ_Rweevil_c108645/f1p6/2872,i1_LQ_Rweevil_c44465/f1p2/1716,i2_HQ_Rweevil_c32609/f42p3/2072
GO:0034227	tRNA thio-modification	biological_process	0.21871	1	1	3203	2	27707	0		1	i3_LQ_Rweevil_c27003/f1p1/3673
GO:0001682	tRNA 5'-leader removal	biological_process	0.21898	1	1	3203	2	27707	0		1	i2_LQ_Rweevil_c48988/f1p3/2090
GO:0048472	threonine-phosphate decarboxylase activity	molecular_function	0.21909	1	1	3203	2	27707	0		1	i2_LQ_Rweevil_c60034/f1p2/2191
GO:0000217	DNA secondary structure binding	molecular_function	0.21919	1	1	3203	2	27707	0		1	i2_LQ_Rweevil_c86378/f1p3/2200
GO:0000400	four-way junction DNA binding	molecular_function	0.21919	1	1	3203	2	27707	0		1	i2_LQ_Rweevil_c86378/f1p3/2200
GO:0009507	chloroplast	cellular_component	0.21943	1	1	3203	2	27707	0		1	i2_LQ_Rweevil_c12178/f1p1/2373
GO:0009536	plastid	cellular_component	0.21943	1	1	3203	2	27707	0		1	i2_LQ_Rweevil_c12178/f1p1/2373
GO:0046422	violaxanthin de-epoxidase activity	molecular_function	0.21943	1	1	3203	2	27707	0		1	i2_LQ_Rweevil_c12178/f1p1/2373
GO:0001933	negative regulation of protein phosphorylation	biological_process	0.21949	1	1	3203	2	27707	1	i3_LQ_Rweevil_c14869/f1p0/3047	0
GO:0004862	cAMP-dependent protein kinase inhibitor activity	molecular_function	0.21949	1	1	3203	2	27707	1	i3_LQ_Rweevil_c14869/f1p0/3047	0
GO:0006469	negative regulation of protein kinase activity	biological_process	0.21949	1	1	3203	2	27707	1	i3_LQ_Rweevil_c14869/f1p0/3047	0
GO:0033673	negative regulation of kinase activity	biological_process	0.21949	1	1	3203	2	27707	1	i3_LQ_Rweevil_c14869/f1p0/3047	0
GO:0042326	negative regulation of phosphorylation	biological_process	0.21949	1	1	3203	2	27707	1	i3_LQ_Rweevil_c14869/f1p0/3047	0
GO:0016286	small conductance calcium-activated potassium channel activity	molecular_function	0.21951	1	1	3203	2	27707	0		1	i2_LQ_Rweevil_c59048/f1p0/2825
GO:0006282	regulation of DNA repair	biological_process	0.21958	1	1	3203	2	27707	1	i2_LQ_Rweevil_c13738/f1p11/2653	0
GO:0080135	regulation of cellular response to stress	biological_process	0.21958	1	1	3203	2	27707	1	i2_LQ_Rweevil_c13738/f1p11/2653	0
GO:2001020	regulation of response to DNA damage stimulus	biological_process	0.21958	1	1	3203	2	27707	1	i2_LQ_Rweevil_c13738/f1p11/2653	0
GO:0046417	chorismate metabolic process	biological_process	0.21961	1	1	3203	2	27707	0		1	i2_LQ_Rweevil_c27658/f1p8/2769
GO:0030908	protein splicing	biological_process	0.21961	1	1	3203	2	27707	0		1	i2_HQ_Rweevil_c21293/f2p1/2845
GO:0016855	racemase and epimerase activity, acting on amino acids and derivatives	molecular_function	0.21961	1	1	3203	2	27707	0		1	i3_LQ_Rweevil_c2747/f1p0/3313
GO:0036361	racemase activity, acting on amino acids and derivatives	molecular_function	0.21961	1	1	3203	2	27707	0		1	i3_LQ_Rweevil_c2747/f1p0/3313
GO:0008320	protein transmembrane transporter activity	molecular_function	0.21968	1	1	3203	2	27707	0		1	i4_LQ_Rweevil_c7155/f1p0/4814
GO:0015450	P-P-bond-hydrolysis-driven protein transmembrane transporter activity	molecular_function	0.21968	1	1	3203	2	27707	0		1	i4_LQ_Rweevil_c7155/f1p0/4814
GO:0043189	H4/H2A histone acetyltransferase complex	cellular_component	0.21975	1	1	3203	2	27707	0		1	i2_LQ_Rweevil_c56842/f1p2/2243
GO:1902562	H4 histone acetyltransferase complex	cellular_component	0.21975	1	1	3203	2	27707	0		1	i2_LQ_Rweevil_c56842/f1p2/2243
GO:0007605	sensory perception of sound	biological_process	0.2205	1	1	3203	2	27707	0		1	i6_LQ_Rweevil_c2185/f1p0/6092
GO:0050954	sensory perception of mechanical stimulus	biological_process	0.2205	1	1	3203	2	27707	0		1	i6_LQ_Rweevil_c2185/f1p0/6092
GO:0006885	regulation of pH	biological_process	0.22065	1	1	3203	2	27707	1	i6_LQ_Rweevil_c1913/f1p0/6208	0
GO:0055067	monovalent inorganic cation homeostasis	biological_process	0.22065	1	1	3203	2	27707	1	i6_LQ_Rweevil_c1913/f1p0/6208	0
GO:0051239	regulation of multicellular organismal process	biological_process	0.22076	1	7	3203	43	27707	4	i2_LQ_Rweevil_c59920/f1p1/2934,i1_LQ_Rweevil_c50155/f1p1/1754,i2_LQ_Rweevil_c55224/f1p4/2604,i1_LQ_Rweevil_c67077/f1p0/1989	3	i11_LQ_Rweevil_c12/f1p0/11139,i7_LQ_Rweevil_c114/f1p0/7273,i2_LQ_Rweevil_c58118/f1p0/2812
GO:0001897	cytolysis by symbiont of host cells	biological_process	0.22184	1	1	3203	2	27707	0		1	i3_LQ_Rweevil_c5174/f1p6/3852
GO:0019836	hemolysis by symbiont of host erythrocytes	biological_process	0.22184	1	1	3203	2	27707	0		1	i3_LQ_Rweevil_c5174/f1p6/3852
GO:0044179	hemolysis in other organism	biological_process	0.22184	1	1	3203	2	27707	0		1	i3_LQ_Rweevil_c5174/f1p6/3852
GO:0051801	cytolysis in other organism involved in symbiotic interaction	biological_process	0.22184	1	1	3203	2	27707	0		1	i3_LQ_Rweevil_c5174/f1p6/3852
GO:0052331	hemolysis in other organism involved in symbiotic interaction	biological_process	0.22184	1	1	3203	2	27707	0		1	i3_LQ_Rweevil_c5174/f1p6/3852
GO:0004867	serine-type endopeptidase inhibitor activity	molecular_function	0.22269	1	6	3203	36	27707	3	i0_HQ_Rweevil_c61272/f2p1/408,i0_LQ_Rweevil_c26220/f1p0/412,i0_LQ_Rweevil_c3351/f1p0/787	3	i2_LQ_Rweevil_c104665/f1p0/2774,i8_LQ_Rweevil_c42/f1p0/8938,i8_LQ_Rweevil_c219/f1p0/8426
GO:0009084	glutamine family amino acid biosynthetic process	biological_process	0.22322	1	4	3203	21	27707	3	i7_LQ_Rweevil_c163/f1p0/7822,i4_LQ_Rweevil_c10298/f1p0/4710,i3_LQ_Rweevil_c43458/f1p0/3034	1	i2_HQ_Rweevil_c73820/f17p1/2269
GO:0044248	cellular catabolic process	biological_process	0.22416	1	121	3203	977	27707	58	i2_LQ_Rweevil_c6147/f1p3/2880,i1_LQ_Rweevil_c50155/f1p1/1754,i5_LQ_Rweevil_c1162/f1p0/5267,i3_LQ_Rweevil_c17826/f1p12/3177,i3_LQ_Rweevil_c33521/f1p0/3649,i2_LQ_Rweevil_c44954/f1p3/2376,i2_HQ_Rweevil_c147268/f2p3/2179,i5_LQ_Rweevil_c3378/f1p0/5681,i3_LQ_Rweevil_c25027/f1p9/3644,i3_LQ_Rweevil_c26421/f1p0/3357,i3_LQ_Rweevil_c23226/f1p0/3675,i4_LQ_Rweevil_c2139/f1p0/4293,i3_LQ_Rweevil_c21758/f1p0/378…	63	i2_LQ_Rweevil_c154820/f1p6/2288,i3_LQ_Rweevil_c5647/f1p0/3916,i0_HQ_Rweevil_c918/f9p0/941,i3_LQ_Rweevil_c43158/f1p0/3009,i5_LQ_Rweevil_c1155/f1p0/5261,i2_HQ_Rweevil_c2548/f5p6/2424,i7_LQ_Rweevil_c453/f1p0/7423,i2_LQ_Rweevil_c23856/f1p0/2512,i2_LQ_Rweevil_c29591/f1p2/2046,i0_HQ_Rweevil_c162/f18p0/926,i0_LQ_Rweevil_c60066/f1p0/893,i2_LQ_Rweevil_c93573/f1p2/2110,i3_LQ_Rweevil_c37002/f1p1/3256,i2_LQ_…
GO:1901564	organonitrogen compound metabolic process	biological_process	0.22536	1	223	3203	1861	27707	120	i1_LQ_Rweevil_c30819/f1p9/1646,i4_LQ_Rweevil_c5997/f1p1/4781,i1_HQ_Rweevil_c83822/f9p37/1119,i4_HQ_Rweevil_c1158/f4p0/4431,i5_HQ_Rweevil_c430/f2p0/5534,i2_HQ_Rweevil_c31818/f23p3/2955,i2_LQ_Rweevil_c82705/f1p23/2501,i1_LQ_Rweevil_c50912/f1p0/1656,i4_LQ_Rweevil_c5401/f1p17/4233,i3_LQ_Rweevil_c9581/f1p8/3698,i0_LQ_Rweevil_c58216/f1p0/679,i1_LQ_Rweevil_c6613/f1p0/1905,i3_LQ_Rweevil_c6668/f1p0/3161,i…	103	i2_LQ_Rweevil_c115091/f1p20/2356,i2_HQ_Rweevil_c28022/f2p9/2426,i2_LQ_Rweevil_c18578/f1p0/2624,i9_LQ_Rweevil_c317/f1p0/9013,i3_LQ_Rweevil_c27781/f1p1/4007,i1_HQ_Rweevil_c96480/f7p0/1646,i2_LQ_Rweevil_c69232/f1p38/2134,i2_LQ_Rweevil_c108641/f1p22/2954,i3_LQ_Rweevil_c25589/f1p0/3141,i3_LQ_Rweevil_c9986/f1p1/3912,i2_LQ_Rweevil_c11842/f1p1/2342,i0_LQ_Rweevil_c22873/f1p0/943,i2_LQ_Rweevil_c19198/f1p4/…
GO:0051181	cofactor transport	biological_process	0.2302	1	2	3203	8	27707	0		2	i2_HQ_Rweevil_c21542/f2p1/2729,i2_HQ_Rweevil_c2340/f7p1/2708
GO:0006553	lysine metabolic process	biological_process	0.23035	1	2	3203	8	27707	0		2	i3_LQ_Rweevil_c25589/f1p0/3141,i3_HQ_Rweevil_c1440/f7p0/3196
GO:0045261	proton-transporting ATP synthase complex, catalytic core F(1)	cellular_component	0.2314	1	3	3203	15	27707	2	i1_LQ_Rweevil_c5955/f1p0/1950,i1_LQ_Rweevil_c29610/f1p4/1799	1	i6_LQ_Rweevil_c1261/f1p0/6409
GO:0042302	structural constituent of cuticle	molecular_function	0.23367	1	9	3203	63	27707	5	i0_HQ_Rweevil_c21681/f2p0/644,i0_LQ_Rweevil_c30937/f1p0/652,i0_HQ_Rweevil_c1831/f3p0/581,i1_LQ_Rweevil_c21485/f1p0/1589,i2_LQ_Rweevil_c59003/f1p0/2164	4	i0_HQ_Rweevil_c560/f13p0/556,i1_HQ_Rweevil_c2227/f5p0/1890,i0_LQ_Rweevil_c5139/f2p0/713,i1_LQ_Rweevil_c25289/f1p0/1177
GO:0005516	calmodulin binding	molecular_function	0.23409	1	6	3203	36	27707	2	i5_HQ_Rweevil_c558/f2p0/5401,i5_LQ_Rweevil_c1531/f1p3/5630	4	i2_LQ_Rweevil_c106904/f1p31/3031,i2_HQ_Rweevil_c1571/f9p32/2954,i4_LQ_Rweevil_c13321/f1p11/4042,i5_LQ_Rweevil_c3062/f1p6/5663
GO:0006516	glycoprotein catabolic process	biological_process	0.23442	1	2	3203	8	27707	0		2	i1_LQ_Rweevil_c51913/f1p0/1998,i1_LQ_Rweevil_c51305/f1p0/1834
GO:0004806	triglyceride lipase activity	molecular_function	0.23447	1	2	3203	8	27707	1	i3_LQ_Rweevil_c36180/f1p117/3111	1	i1_LQ_Rweevil_c14938/f1p0/1091
GO:0008017	microtubule binding	molecular_function	0.23574	1	30	3203	224	27707	13	i3_LQ_Rweevil_c27243/f1p3/3632,i6_LQ_Rweevil_c1852/f1p0/6241,i3_LQ_Rweevil_c19706/f1p0/3069,i2_LQ_Rweevil_c109811/f1p22/2985,i1_LQ_Rweevil_c4272/f2p0/1985,i2_LQ_Rweevil_c55224/f1p4/2604,i5_LQ_Rweevil_c1531/f1p3/5630,i3_LQ_Rweevil_c11141/f1p3/3205,i3_LQ_Rweevil_c5680/f1p0/3407,i3_LQ_Rweevil_c28121/f1p0/3628,i4_LQ_Rweevil_c12972/f1p60/4077,i3_HQ_Rweevil_c40635/f18p0/3497,i2_LQ_Rweevil_c98680/f1p11/…	17	i4_LQ_Rweevil_c14251/f1p10/4244,i3_LQ_Rweevil_c34705/f1p0/3181,i2_LQ_Rweevil_c48317/f1p3/1991,i3_LQ_Rweevil_c31418/f1p0/3041,i3_LQ_Rweevil_c18218/f1p0/3069,i2_LQ_Rweevil_c57117/f1p11/2230,i4_LQ_Rweevil_c2275/f1p4/4434,i3_LQ_Rweevil_c11458/f1p0/3726,i2_LQ_Rweevil_c24813/f1p1/2432,i1_HQ_Rweevil_c1232/f17p0/1930,i2_LQ_Rweevil_c109220/f1p20/2862,i3_LQ_Rweevil_c12747/f1p0/3509,i3_LQ_Rweevil_c24226/f1p…
GO:0007017	microtubule-based process	biological_process	0.23797	1	36	3203	274	27707	9	i3_LQ_Rweevil_c20957/f1p0/3522,i1_LQ_Rweevil_c54239/f1p0/1755,i1_LQ_Rweevil_c53573/f1p0/1907,i2_LQ_Rweevil_c3915/f1p6/2347,i3_LQ_Rweevil_c39396/f1p0/3083,i2_LQ_Rweevil_c108705/f1p2/2381,i3_LQ_Rweevil_c21417/f1p6/3230,i3_LQ_Rweevil_c28485/f1p0/3157,i2_LQ_Rweevil_c61004/f1p7/2613	27	i4_LQ_Rweevil_c14251/f1p10/4244,i3_LQ_Rweevil_c25836/f1p0/3224,i1_LQ_Rweevil_c27253/f1p5/1990,i3_LQ_Rweevil_c15089/f1p1/3036,i3_LQ_Rweevil_c11458/f1p0/3726,i3_LQ_Rweevil_c5759/f1p60/3857,i3_LQ_Rweevil_c24226/f1p0/3352,i3_HQ_Rweevil_c40362/f2p0/3048,i3_LQ_Rweevil_c31418/f1p0/3041,i3_LQ_Rweevil_c34705/f1p0/3181,i3_LQ_Rweevil_c19712/f1p6/3391,i2_LQ_Rweevil_c38367/f1p5/2852,i5_LQ_Rweevil_c3661/f1p0/5…
GO:0007600	sensory perception	biological_process	0.24089	1	3	3203	15	27707	1	i7_LQ_Rweevil_c551/f1p0/7327	2	i6_LQ_Rweevil_c2185/f1p0/6092,i1_HQ_Rweevil_c96923/f8p0/1135
GO:0050877	neurological system process	biological_process	0.24089	1	3	3203	15	27707	1	i7_LQ_Rweevil_c551/f1p0/7327	2	i6_LQ_Rweevil_c2185/f1p0/6092,i1_HQ_Rweevil_c96923/f8p0/1135
GO:0008443	phosphofructokinase activity	molecular_function	0.24217	1	10	3203	67	27707	5	i2_HQ_Rweevil_c52133/f4p4/2143,i1_HQ_Rweevil_c17272/f8p0/1863,i2_HQ_Rweevil_c47130/f2p5/2099,i4_LQ_Rweevil_c11472/f1p13/4852,i2_LQ_Rweevil_c153769/f1p8/2884	5	i2_LQ_Rweevil_c85130/f1p0/2686,i2_LQ_Rweevil_c24555/f1p5/2795,i3_LQ_Rweevil_c22082/f1p0/3068,i4_LQ_Rweevil_c6874/f1p0/4695,i1_LQ_Rweevil_c122058/f1p0/1120
GO:0019200	carbohydrate kinase activity	molecular_function	0.24217	1	10	3203	67	27707	5	i2_LQ_Rweevil_c153769/f1p8/2884,i2_HQ_Rweevil_c47130/f2p5/2099,i4_LQ_Rweevil_c11472/f1p13/4852,i1_HQ_Rweevil_c17272/f8p0/1863,i2_HQ_Rweevil_c52133/f4p4/2143	5	i4_LQ_Rweevil_c6874/f1p0/4695,i1_LQ_Rweevil_c122058/f1p0/1120,i3_LQ_Rweevil_c22082/f1p0/3068,i2_LQ_Rweevil_c85130/f1p0/2686,i2_LQ_Rweevil_c24555/f1p5/2795
GO:0003756	protein disulfide isomerase activity	molecular_function	0.24275	1	1	3203	2	27707	0		1	i2_LQ_Rweevil_c40474/f1p0/2654
GO:0016864	intramolecular oxidoreductase activity, transposing S-S bonds	molecular_function	0.24275	1	1	3203	2	27707	0		1	i2_LQ_Rweevil_c40474/f1p0/2654
GO:0005746	mitochondrial respiratory chain	cellular_component	0.24295	1	4	3203	23	27707	3	i1_LQ_Rweevil_c5987/f1p0/1730,i0_HQ_Rweevil_c1230/f6p0/455,i0_LQ_Rweevil_c3572/f1p0/757	1	i3_LQ_Rweevil_c28594/f1p0/3183
GO:0070469	respiratory chain	cellular_component	0.24295	1	4	3203	23	27707	3	i0_LQ_Rweevil_c3572/f1p0/757,i0_HQ_Rweevil_c1230/f6p0/455,i1_LQ_Rweevil_c5987/f1p0/1730	1	i3_LQ_Rweevil_c28594/f1p0/3183
GO:0042180	cellular ketone metabolic process	biological_process	0.24361	1	4	3203	22	27707	0		4	i0_LQ_Rweevil_c60066/f1p0/893,i2_LQ_Rweevil_c113245/f1p3/2425,i2_LQ_Rweevil_c22765/f1p28/2229,i2_LQ_Rweevil_c111421/f1p10/2449
GO:0008948	oxaloacetate decarboxylase activity	molecular_function	0.24514	1	5	3203	30	27707	4	i5_LQ_Rweevil_c929/f1p0/5947,i0_LQ_Rweevil_c27279/f1p3/610,i0_LQ_Rweevil_c23142/f1p0/848,i2_LQ_Rweevil_c19793/f1p2/2470	1	i2_LQ_Rweevil_c37484/f1p13/2963
GO:0035725	sodium ion transmembrane transport	biological_process	0.24514	1	5	3203	30	27707	4	i0_LQ_Rweevil_c23142/f1p0/848,i0_LQ_Rweevil_c27279/f1p3/610,i5_LQ_Rweevil_c929/f1p0/5947,i2_LQ_Rweevil_c19793/f1p2/2470	1	i2_LQ_Rweevil_c37484/f1p13/2963
GO:0071436	sodium ion export	biological_process	0.24514	1	5	3203	30	27707	4	i2_LQ_Rweevil_c19793/f1p2/2470,i5_LQ_Rweevil_c929/f1p0/5947,i0_LQ_Rweevil_c27279/f1p3/610,i0_LQ_Rweevil_c23142/f1p0/848	1	i2_LQ_Rweevil_c37484/f1p13/2963
GO:0005242	inward rectifier potassium channel activity	molecular_function	0.24517	1	3	3203	15	27707	3	i3_LQ_Rweevil_c36265/f1p0/3285,i3_LQ_Rweevil_c33769/f1p0/3187,i3_HQ_Rweevil_c1899/f3p3/3226	0
GO:0030414	peptidase inhibitor activity	molecular_function	0.24618	1	17	3203	122	27707	10	i4_LQ_Rweevil_c4880/f1p1/4594,i3_LQ_Rweevil_c8041/f1p0/3614,i4_HQ_Rweevil_c1584/f2p0/4697,i0_LQ_Rweevil_c3351/f1p0/787,i0_HQ_Rweevil_c61272/f2p1/408,i3_LQ_Rweevil_c26061/f1p0/3179,i4_LQ_Rweevil_c11938/f1p0/4777,i4_LQ_Rweevil_c8892/f1p11/4356,i0_LQ_Rweevil_c26220/f1p0/412,i4_LQ_Rweevil_c2195/f1p1/4821	7	i2_LQ_Rweevil_c65441/f1p2/2366,i3_HQ_Rweevil_c40346/f5p0/3129,i2_LQ_Rweevil_c104665/f1p0/2774,i4_LQ_Rweevil_c9973/f1p2/4325,i8_LQ_Rweevil_c219/f1p0/8426,i8_LQ_Rweevil_c42/f1p0/8938,i4_LQ_Rweevil_c9293/f1p0/4538
GO:0061134	peptidase regulator activity	molecular_function	0.24618	1	17	3203	122	27707	10	i4_LQ_Rweevil_c4880/f1p1/4594,i4_LQ_Rweevil_c2195/f1p1/4821,i0_LQ_Rweevil_c26220/f1p0/412,i4_LQ_Rweevil_c8892/f1p11/4356,i4_LQ_Rweevil_c11938/f1p0/4777,i3_LQ_Rweevil_c26061/f1p0/3179,i3_LQ_Rweevil_c8041/f1p0/3614,i0_LQ_Rweevil_c3351/f1p0/787,i4_HQ_Rweevil_c1584/f2p0/4697,i0_HQ_Rweevil_c61272/f2p1/408	7	i2_LQ_Rweevil_c104665/f1p0/2774,i3_HQ_Rweevil_c40346/f5p0/3129,i2_LQ_Rweevil_c65441/f1p2/2366,i8_LQ_Rweevil_c42/f1p0/8938,i4_LQ_Rweevil_c9293/f1p0/4538,i8_LQ_Rweevil_c219/f1p0/8426,i4_LQ_Rweevil_c9973/f1p2/4325
GO:0009064	glutamine family amino acid metabolic process	biological_process	0.24621	1	7	3203	44	27707	5	i4_LQ_Rweevil_c2721/f1p0/4850,i7_LQ_Rweevil_c163/f1p0/7822,i2_HQ_Rweevil_c1787/f10p2/2275,i4_LQ_Rweevil_c10298/f1p0/4710,i3_LQ_Rweevil_c43458/f1p0/3034	2	i2_HQ_Rweevil_c73820/f17p1/2269,i2_LQ_Rweevil_c24221/f1p0/2276
GO:0072594	establishment of protein localization to organelle	biological_process	0.24748	1	43	3203	335	27707	17	i1_LQ_Rweevil_c50155/f1p1/1754,i3_LQ_Rweevil_c24250/f1p0/3313,i3_LQ_Rweevil_c4988/f1p0/3263,i5_LQ_Rweevil_c1281/f1p0/5711,i5_LQ_Rweevil_c1162/f1p0/5267,i1_LQ_Rweevil_c4272/f2p0/1985,i2_LQ_Rweevil_c135408/f1p7/2494,i7_LQ_Rweevil_c289/f1p0/7847,i6_LQ_Rweevil_c412/f1p7/6586,i0_HQ_Rweevil_c21555/f2p20/734,i3_LQ_Rweevil_c11141/f1p3/3205,i1_LQ_Rweevil_c67077/f1p0/1989,i5_LQ_Rweevil_c1823/f1p0/5203,i8_L…	26	i1_LQ_Rweevil_c54110/f1p30/1464,i6_LQ_Rweevil_c2349/f1p2/6015,i2_LQ_Rweevil_c80275/f1p2/2521,i2_LQ_Rweevil_c154820/f1p6/2288,i2_LQ_Rweevil_c22287/f1p4/2889,i2_HQ_Rweevil_c2548/f5p6/2424,i2_LQ_Rweevil_c85150/f1p6/2680,i6_LQ_Rweevil_c685/f1p0/6371,i2_LQ_Rweevil_c64540/f1p5/2820,i2_LQ_Rweevil_c38010/f1p4/2512,i5_LQ_Rweevil_c4662/f1p0/5091,i2_LQ_Rweevil_c23450/f1p5/2669,i2_HQ_Rweevil_c139473/f2p8/203…
GO:0006839	mitochondrial transport	biological_process	0.24808	1	6	3203	38	27707	3	i4_LQ_Rweevil_c12015/f1p0/4394,i0_HQ_Rweevil_c989/f12p0/562,i0_HQ_Rweevil_c21555/f2p20/734	3	i2_LQ_Rweevil_c64540/f1p5/2820,i6_LQ_Rweevil_c2231/f1p0/6028,i6_LQ_Rweevil_c2349/f1p2/6015
GO:0004843	ubiquitin-specific protease activity	molecular_function	0.24853	1	3	3203	15	27707	2	i4_LQ_Rweevil_c10967/f1p0/4308,i4_LQ_Rweevil_c11311/f1p0/4458	1	i1_HQ_Rweevil_c84508/f5p0/1096
GO:0016903	oxidoreductase activity, acting on the aldehyde or oxo group of donors	molecular_function	0.24908	1	14	3203	99	27707	8	i3_HQ_Rweevil_c11789/f3p0/3626,i2_LQ_Rweevil_c104958/f1p10/2300,i3_LQ_Rweevil_c18031/f1p0/3665,i3_LQ_Rweevil_c6352/f1p24/3995,i2_HQ_Rweevil_c36014/f4p25/2315,i3_LQ_Rweevil_c36811/f1p0/3632,i4_LQ_Rweevil_c3381/f1p0/4400,i2_LQ_Rweevil_c45247/f1p38/3003	6	i2_HQ_Rweevil_c32609/f42p3/2072,i2_LQ_Rweevil_c94917/f1p6/1981,i2_LQ_Rweevil_c108645/f1p6/2872,i3_LQ_Rweevil_c25589/f1p0/3141,i3_HQ_Rweevil_c1440/f7p0/3196,i1_LQ_Rweevil_c7756/f1p0/1680
GO:0004064	arylesterase activity	molecular_function	0.24925	1	5	3203	29	27707	1	i2_LQ_Rweevil_c150796/f1p3/2909	4	i1_LQ_Rweevil_c62160/f1p0/1088,i4_HQ_Rweevil_c13553/f26p6/4312,i2_LQ_Rweevil_c60623/f1p4/2902,i2_LQ_Rweevil_c85942/f1p6/2498
GO:0007010	cytoskeleton organization	biological_process	0.24933	1	55	3203	433	27707	24	i1_LQ_Rweevil_c6852/f1p0/1890,i1_LQ_Rweevil_c50155/f1p1/1754,i1_LQ_Rweevil_c8817/f1p0/1693,i3_LQ_Rweevil_c17675/f1p0/3958,i5_LQ_Rweevil_c1162/f1p0/5267,i1_LQ_Rweevil_c67604/f1p0/1751,i2_LQ_Rweevil_c58365/f1p10/1997,i3_LQ_Rweevil_c20957/f1p0/3522,i5_LQ_Rweevil_c4702/f1p11/5793,i2_LQ_Rweevil_c61004/f1p7/2613,i3_LQ_Rweevil_c28485/f1p0/3157,i3_LQ_Rweevil_c10352/f1p1/3385,i3_LQ_Rweevil_c21417/f1p6/323…	31	i3_HQ_Rweevil_c40362/f2p0/3048,i3_LQ_Rweevil_c5647/f1p0/3916,i2_LQ_Rweevil_c43698/f1p9/2661,i4_LQ_Rweevil_c2451/f1p0/4298,i4_HQ_Rweevil_c630/f11p0/4888,i4_LQ_Rweevil_c2275/f1p4/4434,i1_LQ_Rweevil_c52460/f1p0/1638,i3_LQ_Rweevil_c15089/f1p1/3036,i3_LQ_Rweevil_c25836/f1p0/3224,i3_LQ_Rweevil_c29801/f1p0/3108,i0_LQ_Rweevil_c27970/f1p0/756,i1_HQ_Rweevil_c1101/f24p0/1812,i2_LQ_Rweevil_c108261/f1p2/2820,…
GO:0040007	growth	biological_process	0.25201	1	4	3203	23	27707	3	i0_HQ_Rweevil_c13223/f3p4/493,i0_LQ_Rweevil_c6690/f1p0/555,i5_HQ_Rweevil_c557/f2p0/5530	1	i4_LQ_Rweevil_c6211/f1p3/4739
GO:0016679	oxidoreductase activity, acting on diphenols and related substances as donors	molecular_function	0.2544	1	2	3203	9	27707	2	i1_LQ_Rweevil_c16721/f1p0/1133,i2_LQ_Rweevil_c124475/f1p7/2045	0
GO:0007156	homophilic cell adhesion via plasma membrane adhesion molecules	biological_process	0.25804	1	8	3203	51	27707	0		8	i5_LQ_Rweevil_c2987/f1p3/5592,i6_LQ_Rweevil_c2210/f1p0/6062,i3_HQ_Rweevil_c40793/f26p0/3200,i3_LQ_Rweevil_c17700/f2p6/3381,i9_LQ_Rweevil_c137/f1p0/9324,i3_LQ_Rweevil_c19841/f1p0/3080,i4_LQ_Rweevil_c5576/f1p0/4591,i11_LQ_Rweevil_c66/f1p0/11519
GO:0006091	generation of precursor metabolites and energy	biological_process	0.25992	1	31	3203	239	27707	25	i1_HQ_Rweevil_c29789/f4p0/1677,i4_HQ_Rweevil_c1158/f4p0/4431,i2_LQ_Rweevil_c11827/f1p321/2430,i3_LQ_Rweevil_c24046/f1p0/3300,i5_LQ_Rweevil_c3832/f1p6/5509,i0_LQ_Rweevil_c28504/f1p0/912,i4_LQ_Rweevil_c3157/f1p0/4835,i2_LQ_Rweevil_c153769/f1p8/2884,i7_LQ_Rweevil_c565/f1p0/7239,i2_LQ_Rweevil_c9947/f1p8/2889,i1_LQ_Rweevil_c38182/f1p0/1626,i1_LQ_Rweevil_c81206/f1p0/1743,i4_LQ_Rweevil_c7765/f1p0/4625,i…	6	i1_HQ_Rweevil_c96480/f7p0/1646,i2_HQ_Rweevil_c99536/f30p7/2798,i2_LQ_Rweevil_c42540/f1p4/2402,i2_LQ_Rweevil_c85130/f1p0/2686,i2_LQ_Rweevil_c24555/f1p5/2795,i3_LQ_Rweevil_c28594/f1p0/3183
GO:0010506	regulation of autophagy	biological_process	0.26115	1	21	3203	156	27707	11	i2_HQ_Rweevil_c90921/f3p7/2310,i2_HQ_Rweevil_c79972/f2p3/3278,i1_LQ_Rweevil_c6852/f1p0/1890,i1_LQ_Rweevil_c30154/f1p0/1691,i1_LQ_Rweevil_c48518/f1p0/1916,i1_LQ_Rweevil_c71593/f1p0/1725,i2_LQ_Rweevil_c36307/f1p17/2632,i3_HQ_Rweevil_c19173/f2p0/3599,i2_LQ_Rweevil_c55224/f1p4/2604,i3_LQ_Rweevil_c22924/f1p0/3519,i2_LQ_Rweevil_c10446/f1p1/2544	10	i3_LQ_Rweevil_c5647/f1p0/3916,i2_LQ_Rweevil_c31521/f1p17/2037,i3_LQ_Rweevil_c12587/f1p0/3810,i2_HQ_Rweevil_c1904/f10p3/2685,i2_LQ_Rweevil_c115091/f1p20/2356,i2_HQ_Rweevil_c54191/f2p7/2434,i3_HQ_Rweevil_c1882/f5p0/3217,i2_HQ_Rweevil_c139473/f2p8/2032,i5_LQ_Rweevil_c2105/f1p0/5117,i3_LQ_Rweevil_c15089/f1p1/3036
GO:0006825	copper ion transport	biological_process	0.26429	1	3	3203	16	27707	1	i0_HQ_Rweevil_c5019/f3p0/441	2	i1_LQ_Rweevil_c53458/f1p0/1733,i1_LQ_Rweevil_c11386/f1p0/1543
GO:0008202	steroid metabolic process	biological_process	0.26547	1	11	3203	77	27707	4	i0_HQ_Rweevil_c553/f11p0/888,i3_HQ_Rweevil_c43053/f7p77/3209,i1_LQ_Rweevil_c41584/f1p0/1719,i1_LQ_Rweevil_c30675/f1p0/1922	7	i2_LQ_Rweevil_c163194/f1p6/1966,i2_LQ_Rweevil_c26312/f1p8/2200,i1_LQ_Rweevil_c7756/f1p0/1680,i1_LQ_Rweevil_c44465/f1p2/1716,i2_HQ_Rweevil_c32609/f42p3/2072,i2_LQ_Rweevil_c108645/f1p6/2872,i2_LQ_Rweevil_c94917/f1p6/1981
GO:0005777	peroxisome	cellular_component	0.2661	1	11	3203	77	27707	5	i3_LQ_Rweevil_c23226/f1p0/3675,i0_LQ_Rweevil_c52297/f1p0/776,i1_LQ_Rweevil_c14992/f1p10/1123,i2_HQ_Rweevil_c22450/f2p3/2955,i2_LQ_Rweevil_c108705/f1p2/2381	6	i2_LQ_Rweevil_c85150/f1p6/2680,i2_LQ_Rweevil_c23450/f1p5/2669,i2_LQ_Rweevil_c82722/f1p0/2507,i2_LQ_Rweevil_c116774/f1p1/2668,i3_LQ_Rweevil_c30177/f1p0/3049,i2_LQ_Rweevil_c22287/f1p4/2889
GO:0042579	microbody	cellular_component	0.2661	1	11	3203	77	27707	5	i2_LQ_Rweevil_c108705/f1p2/2381,i2_HQ_Rweevil_c22450/f2p3/2955,i1_LQ_Rweevil_c14992/f1p10/1123,i0_LQ_Rweevil_c52297/f1p0/776,i3_LQ_Rweevil_c23226/f1p0/3675	6	i3_LQ_Rweevil_c30177/f1p0/3049,i2_LQ_Rweevil_c22287/f1p4/2889,i2_LQ_Rweevil_c23450/f1p5/2669,i2_LQ_Rweevil_c82722/f1p0/2507,i2_LQ_Rweevil_c85150/f1p6/2680,i2_LQ_Rweevil_c116774/f1p1/2668
GO:0004497	monooxygenase activity	molecular_function	0.26844	1	7	3203	45	27707	4	i4_LQ_Rweevil_c12777/f1p0/4036,i1_HQ_Rweevil_c25511/f2p0/1299,i11_LQ_Rweevil_c18/f1p0/11715,i1_LQ_Rweevil_c41260/f1p0/1995	3	i2_HQ_Rweevil_c73820/f17p1/2269,i4_LQ_Rweevil_c4993/f1p0/4393,i2_HQ_Rweevil_c147993/f129p15/2433
GO:0016810	hydrolase activity, acting on carbon-nitrogen (but not peptide) bonds	molecular_function	0.26914	1	18	3203	133	27707	2	i2_HQ_Rweevil_c1787/f10p2/2275,i1_LQ_Rweevil_c30448/f1p0/1790	16	i2_LQ_Rweevil_c3193/f1p16/2518,i1_LQ_Rweevil_c105149/f1p8/1946,i0_LQ_Rweevil_c60066/f1p0/893,i3_HQ_Rweevil_c12773/f2p193/3967,i4_HQ_Rweevil_c1478/f3p0/4607,i4_LQ_Rweevil_c12908/f1p11/4062,i1_HQ_Rweevil_c4289/f2p5/1860,i1_LQ_Rweevil_c10524/f1p2/1756,i2_HQ_Rweevil_c118279/f2p23/2089,i2_LQ_Rweevil_c82070/f1p22/2201,i2_LQ_Rweevil_c22765/f1p28/2229,i2_LQ_Rweevil_c107146/f1p1/2203,i0_HQ_Rweevil_c663/f8…
GO:0030150	protein import into mitochondrial matrix	biological_process	0.27044	1	2	3203	9	27707	0		2	i6_LQ_Rweevil_c2231/f1p0/6028,i6_LQ_Rweevil_c2349/f1p2/6015
GO:0019751	polyol metabolic process	biological_process	0.27069	1	4	3203	23	27707	0		4	i3_LQ_Rweevil_c27969/f1p0/3702,i1_LQ_Rweevil_c91074/f1p0/1127,i7_LQ_Rweevil_c453/f1p0/7423,i1_LQ_Rweevil_c16810/f1p0/1069
GO:0005991	trehalose metabolic process	biological_process	0.27308	1	6	3203	38	27707	5	i4_LQ_Rweevil_c5412/f1p0/4158,i1_LQ_Rweevil_c31482/f1p3/1487,i3_HQ_Rweevil_c17946/f2p9/3378,i2_LQ_Rweevil_c84177/f1p13/3126,i3_LQ_Rweevil_c11128/f1p4/3153	1	i1_LQ_Rweevil_c28133/f1p0/1976
GO:0051052	regulation of DNA metabolic process	biological_process	0.27338	1	4	3203	23	27707	3	i1_LQ_Rweevil_c40618/f1p0/1947,i2_LQ_Rweevil_c13738/f1p11/2653,i2_HQ_Rweevil_c54169/f2p1/2233	1	i2_LQ_Rweevil_c111760/f1p2/2381
GO:0003008	system process	biological_process	0.2739	1	3	3203	16	27707	1	i7_LQ_Rweevil_c551/f1p0/7327	2	i1_HQ_Rweevil_c96923/f8p0/1135,i6_LQ_Rweevil_c2185/f1p0/6092
GO:0071702	organic substance transport	biological_process	0.27412	1	196	3203	1627	27707	86	i2_LQ_Rweevil_c54820/f1p5/2024,i3_LQ_Rweevil_c28280/f1p0/3654,i2_LQ_Rweevil_c108705/f1p2/2381,i3_LQ_Rweevil_c11141/f1p3/3205,i4_LQ_Rweevil_c9100/f1p0/4526,i5_LQ_Rweevil_c1823/f1p0/5203,i8_LQ_Rweevil_c102/f1p0/8951,i2_LQ_Rweevil_c42813/f1p13/3584,i4_LQ_Rweevil_c11169/f1p53/4817,i5_HQ_Rweevil_c241/f5p0/5603,i3_LQ_Rweevil_c23430/f1p4/3618,i4_LQ_Rweevil_c6287/f1p2/4650,i3_LQ_Rweevil_c4988/f1p0/3263,i…	110	i3_LQ_Rweevil_c33862/f1p0/3352,i0_LQ_Rweevil_c27970/f1p0/756,i2_LQ_Rweevil_c88626/f1p2/2735,i3_LQ_Rweevil_c34058/f1p0/3086,i3_LQ_Rweevil_c27717/f1p0/3741,i2_LQ_Rweevil_c82722/f1p0/2507,i2_HQ_Rweevil_c74051/f16p4/2152,i2_LQ_Rweevil_c98093/f1p3/1910,i2_HQ_Rweevil_c147896/f42p5/2637,i2_LQ_Rweevil_c54741/f1p0/2711,i4_HQ_Rweevil_c1992/f2p0/4401,i3_LQ_Rweevil_c26148/f1p0/3082,i2_LQ_Rweevil_c23123/f1p10…
GO:0030684	preribosome	cellular_component	0.27554	1	8	3203	54	27707	5	i1_LQ_Rweevil_c71593/f1p0/1725,i2_LQ_Rweevil_c14795/f1p4/2163,i1_HQ_Rweevil_c14225/f2p0/1191,i3_HQ_Rweevil_c2111/f4p0/3643,i2_HQ_Rweevil_c147837/f3p5/2250	3	i3_LQ_Rweevil_c6842/f1p0/3610,i3_LQ_Rweevil_c25211/f1p0/3950,i4_HQ_Rweevil_c1480/f3p0/4348
GO:0009791	post-embryonic development	biological_process	0.27625	1	2	3203	9	27707	0		2	i1_HQ_Rweevil_c1480/f4p0/1212,i2_LQ_Rweevil_c58418/f1p3/2632
GO:0009878	nodule morphogenesis	biological_process	0.27625	1	2	3203	9	27707	0		2	i2_LQ_Rweevil_c58418/f1p3/2632,i1_HQ_Rweevil_c1480/f4p0/1212
GO:0009886	post-embryonic morphogenesis	biological_process	0.27625	1	2	3203	9	27707	0		2	i1_HQ_Rweevil_c1480/f4p0/1212,i2_LQ_Rweevil_c58418/f1p3/2632
GO:0044111	development involved in symbiotic interaction	biological_process	0.27625	1	2	3203	9	27707	0		2	i2_LQ_Rweevil_c58418/f1p3/2632,i1_HQ_Rweevil_c1480/f4p0/1212
GO:0015079	potassium ion transmembrane transporter activity	molecular_function	0.27651	1	5	3203	31	27707	3	i3_LQ_Rweevil_c36265/f1p0/3285,i3_LQ_Rweevil_c33769/f1p0/3187,i3_HQ_Rweevil_c1899/f3p3/3226	2	i1_LQ_Rweevil_c77054/f1p0/1592,i2_LQ_Rweevil_c59048/f1p0/2825
GO:0098800	inner mitochondrial membrane protein complex	cellular_component	0.27752	1	17	3203	128	27707	9	i1_LQ_Rweevil_c34353/f1p0/1023,i2_LQ_Rweevil_c113912/f1p0/2361,i0_HQ_Rweevil_c1230/f6p0/455,i4_LQ_Rweevil_c11169/f1p53/4817,i3_HQ_Rweevil_c17573/f2p2/3639,i6_LQ_Rweevil_c825/f1p16/6429,i2_HQ_Rweevil_c78235/f2p2/2278,i2_LQ_Rweevil_c42813/f1p13/3584,i0_LQ_Rweevil_c3572/f1p0/757	8	i2_LQ_Rweevil_c87523/f1p5/2582,i3_LQ_Rweevil_c15089/f1p1/3036,i3_LQ_Rweevil_c28594/f1p0/3183,i1_LQ_Rweevil_c34927/f1p56/1047,i1_HQ_Rweevil_c121140/f49p0/1116,i2_LQ_Rweevil_c108641/f1p22/2954,i4_LQ_Rweevil_c2651/f1p2/4977,i2_HQ_Rweevil_c73812/f71p8/2921
GO:0005186	pheromone activity	molecular_function	0.27763	1	2	3203	9	27707	2	i3_LQ_Rweevil_c26794/f1p0/3120,i2_LQ_Rweevil_c40116/f1p12/2310	0
GO:0004612	phosphoenolpyruvate carboxykinase (ATP) activity	molecular_function	0.27784	1	2	3203	9	27707	0		2	i3_LQ_Rweevil_c4248/f1p0/3458,i2_HQ_Rweevil_c1810/f21p0/2408
GO:0006099	tricarboxylic acid cycle	biological_process	0.27822	1	2	3203	9	27707	2	i1_LQ_Rweevil_c5098/f1p0/1686,i1_HQ_Rweevil_c29789/f4p0/1677	0
GO:0006101	citrate metabolic process	biological_process	0.27822	1	2	3203	9	27707	2	i1_LQ_Rweevil_c5098/f1p0/1686,i1_HQ_Rweevil_c29789/f4p0/1677	0
GO:0072350	tricarboxylic acid metabolic process	biological_process	0.27822	1	2	3203	9	27707	2	i1_LQ_Rweevil_c5098/f1p0/1686,i1_HQ_Rweevil_c29789/f4p0/1677	0
GO:0005249	voltage-gated potassium channel activity	molecular_function	0.27827	1	3	3203	16	27707	3	i3_LQ_Rweevil_c36265/f1p0/3285,i3_LQ_Rweevil_c33769/f1p0/3187,i3_HQ_Rweevil_c1899/f3p3/3226	0
GO:0007265	Ras protein signal transduction	biological_process	0.27843	1	21	3203	156	27707	12	i2_LQ_Rweevil_c3286/f1p32/2374,i2_LQ_Rweevil_c135544/f1p43/2975,i4_HQ_Rweevil_c14081/f3p0/4198,i2_LQ_Rweevil_c113219/f1p8/2384,i2_LQ_Rweevil_c108502/f1p2/2897,i3_LQ_Rweevil_c3527/f1p0/3601,i7_LQ_Rweevil_c915/f1p0/7979,i6_LQ_Rweevil_c743/f1p0/6626,i3_LQ_Rweevil_c18949/f1p0/3593,i2_LQ_Rweevil_c6991/f1p33/2179,i3_LQ_Rweevil_c26074/f1p0/3888,i3_LQ_Rweevil_c10116/f1p0/3510	9	i2_LQ_Rweevil_c15036/f1p1/2042,i6_LQ_Rweevil_c1689/f1p0/6908,i2_LQ_Rweevil_c41852/f1p3/3616,i5_HQ_Rweevil_c213/f6p0/5383,i4_LQ_Rweevil_c10297/f1p3/4685,i2_LQ_Rweevil_c115222/f1p4/2301,i2_LQ_Rweevil_c110667/f1p2/2742,i2_LQ_Rweevil_c57749/f1p1/2447,i3_LQ_Rweevil_c20422/f1p1/3553
GO:0046578	regulation of Ras protein signal transduction	biological_process	0.27843	1	21	3203	156	27707	12	i2_LQ_Rweevil_c108502/f1p2/2897,i2_LQ_Rweevil_c113219/f1p8/2384,i4_HQ_Rweevil_c14081/f3p0/4198,i2_LQ_Rweevil_c135544/f1p43/2975,i2_LQ_Rweevil_c3286/f1p32/2374,i3_LQ_Rweevil_c10116/f1p0/3510,i3_LQ_Rweevil_c26074/f1p0/3888,i2_LQ_Rweevil_c6991/f1p33/2179,i3_LQ_Rweevil_c18949/f1p0/3593,i6_LQ_Rweevil_c743/f1p0/6626,i7_LQ_Rweevil_c915/f1p0/7979,i3_LQ_Rweevil_c3527/f1p0/3601	9	i6_LQ_Rweevil_c1689/f1p0/6908,i2_LQ_Rweevil_c15036/f1p1/2042,i3_LQ_Rweevil_c20422/f1p1/3553,i2_LQ_Rweevil_c57749/f1p1/2447,i2_LQ_Rweevil_c110667/f1p2/2742,i2_LQ_Rweevil_c115222/f1p4/2301,i4_LQ_Rweevil_c10297/f1p3/4685,i5_HQ_Rweevil_c213/f6p0/5383,i2_LQ_Rweevil_c41852/f1p3/3616
GO:0044432	endoplasmic reticulum part	cellular_component	0.27844	1	23	3203	176	27707	9	i7_LQ_Rweevil_c551/f1p0/7327,i2_LQ_Rweevil_c14795/f1p4/2163,i2_LQ_Rweevil_c86727/f1p3/2613,i5_LQ_Rweevil_c2078/f1p3/5390,i2_LQ_Rweevil_c57464/f1p25/2964,i2_HQ_Rweevil_c147837/f3p5/2250,i5_LQ_Rweevil_c4622/f1p0/5571,i2_LQ_Rweevil_c88404/f1p2/2427,i3_LQ_Rweevil_c6096/f1p0/3463	14	i2_LQ_Rweevil_c52506/f42p0/2174,i2_LQ_Rweevil_c65535/f1p0/2358,i2_LQ_Rweevil_c60986/f1p0/2940,i2_LQ_Rweevil_c119152/f1p16/1930,i2_HQ_Rweevil_c139139/f3p18/2108,i4_LQ_Rweevil_c12104/f1p4/4798,i1_HQ_Rweevil_c1955/f10p0/1286,i0_LQ_Rweevil_c13492/f1p23/683,i2_LQ_Rweevil_c62366/f1p0/2241,i1_LQ_Rweevil_c68097/f1p0/1836,i2_LQ_Rweevil_c132055/f1p4/2478,i0_LQ_Rweevil_c52386/f1p0/778,i2_HQ_Rweevil_c117871/…
GO:0040011	locomotion	biological_process	0.27911	1	47	3203	372	27707	24	i2_LQ_Rweevil_c7761/f1p1/2921,i6_LQ_Rweevil_c1792/f1p0/6564,i1_LQ_Rweevil_c7708/f1p18/1527,i2_LQ_Rweevil_c44954/f1p3/2376,i1_LQ_Rweevil_c4272/f2p0/1985,i5_HQ_Rweevil_c558/f2p0/5401,i2_LQ_Rweevil_c38382/f1p2/2169,i3_LQ_Rweevil_c7714/f1p0/3374,i3_LQ_Rweevil_c4988/f1p0/3263,i4_LQ_Rweevil_c6428/f1p4/4685,i1_LQ_Rweevil_c50155/f1p1/1754,i1_LQ_Rweevil_c10445/f1p0/1939,i1_LQ_Rweevil_c4940/f1p0/1795,i3_LQ…	23	i7_LQ_Rweevil_c114/f1p0/7273,i2_LQ_Rweevil_c57117/f1p11/2230,i2_HQ_Rweevil_c147752/f24p21/2935,i2_HQ_Rweevil_c17355/f4p2/2789,i3_LQ_Rweevil_c10644/f1p3/3279,i3_LQ_Rweevil_c42008/f1p39/3589,i2_HQ_Rweevil_c1571/f9p32/2954,i1_HQ_Rweevil_c84508/f5p0/1096,i4_LQ_Rweevil_c7155/f1p0/4814,i3_HQ_Rweevil_c4425/f4p0/3348,i0_LQ_Rweevil_c15452/f1p0/544,i4_LQ_Rweevil_c3647/f1p11/4174,i11_LQ_Rweevil_c12/f1p0/111…
GO:0005198	structural molecule activity	molecular_function	0.27937	1	117	3203	977	27707	66	i2_HQ_Rweevil_c2170/f2p8/2331,i1_LQ_Rweevil_c29610/f1p4/1799,i3_LQ_Rweevil_c27353/f1p9/3231,i3_LQ_Rweevil_c28239/f1p0/3371,i2_LQ_Rweevil_c42813/f1p13/3584,i6_LQ_Rweevil_c2214/f1p0/6047,i2_LQ_Rweevil_c44631/f1p79/2754,i3_LQ_Rweevil_c11141/f1p3/3205,i4_LQ_Rweevil_c9100/f1p0/4526,i4_LQ_Rweevil_c6287/f1p2/4650,i0_LQ_Rweevil_c29591/f1p2/313,i4_LQ_Rweevil_c3493/f1p3/4174,i3_LQ_Rweevil_c35690/f1p0/3891,…	51	i4_LQ_Rweevil_c5040/f1p0/4438,i1_HQ_Rweevil_c1232/f17p0/1930,i0_LQ_Rweevil_c5139/f2p0/713,i4_LQ_Rweevil_c11515/f1p0/4582,i4_HQ_Rweevil_c1117/f4p0/4280,i4_LQ_Rweevil_c13413/f1p2/4066,i2_HQ_Rweevil_c73812/f71p8/2921,i2_LQ_Rweevil_c88973/f1p4/2732,i3_HQ_Rweevil_c1087/f8p0/3239,i6_LQ_Rweevil_c1261/f1p0/6409,i0_HQ_Rweevil_c1204/f6p3/814,i1_LQ_Rweevil_c24008/f1p2/1722,i3_HQ_Rweevil_c1690/f6p0/3777,i4_L…
GO:0007399	nervous system development	biological_process	0.27973	1	6	3203	39	27707	2	i5_LQ_Rweevil_c1531/f1p3/5630,i4_LQ_Rweevil_c6428/f1p4/4685	4	i1_LQ_Rweevil_c28081/f1p0/1942,i4_LQ_Rweevil_c13321/f1p11/4042,i2_LQ_Rweevil_c54741/f1p0/2711,i4_LQ_Rweevil_c7155/f1p0/4814
GO:0022008	neurogenesis	biological_process	0.27973	1	6	3203	39	27707	2	i5_LQ_Rweevil_c1531/f1p3/5630,i4_LQ_Rweevil_c6428/f1p4/4685	4	i4_LQ_Rweevil_c13321/f1p11/4042,i1_LQ_Rweevil_c28081/f1p0/1942,i4_LQ_Rweevil_c7155/f1p0/4814,i2_LQ_Rweevil_c54741/f1p0/2711
GO:0030182	neuron differentiation	biological_process	0.27973	1	6	3203	39	27707	2	i4_LQ_Rweevil_c6428/f1p4/4685,i5_LQ_Rweevil_c1531/f1p3/5630	4	i1_LQ_Rweevil_c28081/f1p0/1942,i4_LQ_Rweevil_c13321/f1p11/4042,i2_LQ_Rweevil_c54741/f1p0/2711,i4_LQ_Rweevil_c7155/f1p0/4814
GO:0031175	neuron projection development	biological_process	0.27973	1	6	3203	39	27707	2	i5_LQ_Rweevil_c1531/f1p3/5630,i4_LQ_Rweevil_c6428/f1p4/4685	4	i4_LQ_Rweevil_c7155/f1p0/4814,i2_LQ_Rweevil_c54741/f1p0/2711,i1_LQ_Rweevil_c28081/f1p0/1942,i4_LQ_Rweevil_c13321/f1p11/4042
GO:0048666	neuron development	biological_process	0.27973	1	6	3203	39	27707	2	i5_LQ_Rweevil_c1531/f1p3/5630,i4_LQ_Rweevil_c6428/f1p4/4685	4	i4_LQ_Rweevil_c7155/f1p0/4814,i2_LQ_Rweevil_c54741/f1p0/2711,i1_LQ_Rweevil_c28081/f1p0/1942,i4_LQ_Rweevil_c13321/f1p11/4042
GO:0048699	generation of neurons	biological_process	0.27973	1	6	3203	39	27707	2	i5_LQ_Rweevil_c1531/f1p3/5630,i4_LQ_Rweevil_c6428/f1p4/4685	4	i2_LQ_Rweevil_c54741/f1p0/2711,i4_LQ_Rweevil_c7155/f1p0/4814,i4_LQ_Rweevil_c13321/f1p11/4042,i1_LQ_Rweevil_c28081/f1p0/1942
GO:0009063	cellular amino acid catabolic process	biological_process	0.2811	1	7	3203	46	27707	5	i2_LQ_Rweevil_c25225/f1p8/2143,i3_LQ_Rweevil_c6668/f1p0/3161,i1_LQ_Rweevil_c11458/f1p0/1570,i1_LQ_Rweevil_c6712/f1p0/1175,i4_LQ_Rweevil_c5997/f1p1/4781	2	i2_LQ_Rweevil_c22765/f1p28/2229,i0_LQ_Rweevil_c60066/f1p0/893
GO:0004345	glucose-6-phosphate dehydrogenase activity	molecular_function	0.28139	1	2	3203	9	27707	1	i2_HQ_Rweevil_c23591/f3p9/2681	1	i1_LQ_Rweevil_c77730/f1p11/1809
GO:0090305	nucleic acid phosphodiester bond hydrolysis	biological_process	0.28202	1	3	3203	16	27707	3	i1_LQ_Rweevil_c41686/f1p0/1542,i3_HQ_Rweevil_c8470/f2p13/3526,i2_LQ_Rweevil_c25352/f1p12/2343	0
GO:0031011	Ino80 complex	cellular_component	0.28346	1	2	3203	9	27707	0		2	i3_LQ_Rweevil_c22338/f1p0/3758,i4_LQ_Rweevil_c8293/f1p0/4566
GO:0097346	INO80-type complex	cellular_component	0.28346	1	2	3203	9	27707	0		2	i4_LQ_Rweevil_c8293/f1p0/4566,i3_LQ_Rweevil_c22338/f1p0/3758
GO:0005743	mitochondrial inner membrane	cellular_component	0.28436	1	22	3203	170	27707	13	i2_HQ_Rweevil_c78235/f2p2/2278,i2_LQ_Rweevil_c42813/f1p13/3584,i0_LQ_Rweevil_c3572/f1p0/757,i4_LQ_Rweevil_c12015/f1p0/4394,i1_LQ_Rweevil_c34353/f1p0/1023,i0_LQ_Rweevil_c33680/f1p0/515,i1_LQ_Rweevil_c5987/f1p0/1730,i2_LQ_Rweevil_c113912/f1p0/2361,i0_HQ_Rweevil_c1230/f6p0/455,i0_HQ_Rweevil_c989/f12p0/562,i3_HQ_Rweevil_c17573/f2p2/3639,i4_LQ_Rweevil_c11169/f1p53/4817,i6_LQ_Rweevil_c825/f1p16/6429	9	i2_HQ_Rweevil_c73812/f71p8/2921,i2_LQ_Rweevil_c87523/f1p5/2582,i3_LQ_Rweevil_c15089/f1p1/3036,i3_LQ_Rweevil_c28594/f1p0/3183,i4_LQ_Rweevil_c10272/f1p0/4664,i1_LQ_Rweevil_c34927/f1p56/1047,i1_HQ_Rweevil_c121140/f49p0/1116,i2_LQ_Rweevil_c108641/f1p22/2954,i4_LQ_Rweevil_c2651/f1p2/4977
GO:0022900	electron transport chain	biological_process	0.2846	1	8	3203	55	27707	6	i5_HQ_Rweevil_c557/f2p0/5530,i4_LQ_Rweevil_c7765/f1p0/4625,i0_LQ_Rweevil_c33680/f1p0/515,i4_HQ_Rweevil_c1158/f4p0/4431,i0_HQ_Rweevil_c1230/f6p0/455,i5_LQ_Rweevil_c3832/f1p6/5509	2	i2_LQ_Rweevil_c42540/f1p4/2402,i3_LQ_Rweevil_c28594/f1p0/3183
GO:0009628	response to abiotic stimulus	biological_process	0.28519	1	2	3203	9	27707	2	i7_LQ_Rweevil_c707/f1p0/7991,i5_LQ_Rweevil_c1565/f1p1/5949	0
GO:0004557	alpha-galactosidase activity	molecular_function	0.28662	1	1	3203	3	27707	0		1	i1_HQ_Rweevil_c11970/f2p1/1412
GO:0007166	cell surface receptor signaling pathway	biological_process	0.287	1	22	3203	166	27707	7	i1_HQ_Rweevil_c35180/f2p0/1511,i5_LQ_Rweevil_c3617/f1p0/5795,i1_LQ_Rweevil_c12972/f1p60/1762,i3_HQ_Rweevil_c8030/f3p0/3179,i1_LQ_Rweevil_c12419/f1p1/1724,i1_LQ_Rweevil_c53159/f1p0/1654,i1_LQ_Rweevil_c10445/f1p0/1939	15	i3_LQ_Rweevil_c19966/f1p0/3112,i4_LQ_Rweevil_c9518/f1p0/4565,i4_LQ_Rweevil_c11691/f1p80/4162,i4_LQ_Rweevil_c12521/f1p0/4054,i3_HQ_Rweevil_c13511/f2p6/3526,i9_HQ_Rweevil_c4/f2p0/9144,i2_HQ_Rweevil_c146600/f6p6/2813,i1_LQ_Rweevil_c77191/f1p3/1206,i2_LQ_Rweevil_c61519/f1p0/2169,i2_LQ_Rweevil_c39657/f1p0/2134,i3_LQ_Rweevil_c24656/f1p0/3611,i4_LQ_Rweevil_c10140/f1p10/4317,i5_LQ_Rweevil_c2643/f1p2/5174…
GO:0004499	N,N-dimethylaniline monooxygenase activity	molecular_function	0.2915	1	3	3203	16	27707	3	i4_LQ_Rweevil_c12777/f1p0/4036,i11_LQ_Rweevil_c18/f1p0/11715,i1_HQ_Rweevil_c25511/f2p0/1299	0
GO:0044455	mitochondrial membrane part	cellular_component	0.29478	1	20	3203	154	27707	10	i0_LQ_Rweevil_c3572/f1p0/757,i2_HQ_Rweevil_c78235/f2p2/2278,i2_LQ_Rweevil_c42813/f1p13/3584,i6_LQ_Rweevil_c825/f1p16/6429,i3_HQ_Rweevil_c17573/f2p2/3639,i4_LQ_Rweevil_c11169/f1p53/4817,i2_LQ_Rweevil_c113912/f1p0/2361,i1_LQ_Rweevil_c5987/f1p0/1730,i0_HQ_Rweevil_c1230/f6p0/455,i1_LQ_Rweevil_c34353/f1p0/1023	10	i6_LQ_Rweevil_c2349/f1p2/6015,i6_LQ_Rweevil_c2231/f1p0/6028,i2_HQ_Rweevil_c73812/f71p8/2921,i4_LQ_Rweevil_c2651/f1p2/4977,i1_HQ_Rweevil_c121140/f49p0/1116,i2_LQ_Rweevil_c108641/f1p22/2954,i1_LQ_Rweevil_c34927/f1p56/1047,i2_LQ_Rweevil_c87523/f1p5/2582,i3_LQ_Rweevil_c15089/f1p1/3036,i3_LQ_Rweevil_c28594/f1p0/3183
GO:0005774	vacuolar membrane	cellular_component	0.29769	1	13	3203	94	27707	10	i2_LQ_Rweevil_c23530/f1p2/2987,i4_LQ_Rweevil_c4424/f1p3/4454,i4_HQ_Rweevil_c1588/f2p0/4834,i2_LQ_Rweevil_c77628/f1p8/3057,i2_LQ_Rweevil_c78683/f1p0/2308,i4_LQ_Rweevil_c8323/f1p263/4781,i4_HQ_Rweevil_c1333/f3p0/4503,i2_LQ_Rweevil_c41102/f1p0/2205,i2_LQ_Rweevil_c5851/f1p12/2177,i3_LQ_Rweevil_c26421/f1p0/3357	3	i2_LQ_Rweevil_c88626/f1p2/2735,i2_LQ_Rweevil_c38367/f1p5/2852,i4_LQ_Rweevil_c9767/f1p0/4699
GO:0044437	vacuolar part	cellular_component	0.29769	1	13	3203	94	27707	10	i4_LQ_Rweevil_c8323/f1p263/4781,i2_LQ_Rweevil_c78683/f1p0/2308,i2_LQ_Rweevil_c77628/f1p8/3057,i4_HQ_Rweevil_c1588/f2p0/4834,i2_LQ_Rweevil_c23530/f1p2/2987,i4_LQ_Rweevil_c4424/f1p3/4454,i3_LQ_Rweevil_c26421/f1p0/3357,i2_LQ_Rweevil_c5851/f1p12/2177,i4_HQ_Rweevil_c1333/f3p0/4503,i2_LQ_Rweevil_c41102/f1p0/2205	3	i2_LQ_Rweevil_c38367/f1p5/2852,i4_LQ_Rweevil_c9767/f1p0/4699,i2_LQ_Rweevil_c88626/f1p2/2735
GO:0004579	dolichyl-diphosphooligosaccharide-protein glycotransferase activity	molecular_function	0.29814	1	1	3203	3	27707	0		1	i1_LQ_Rweevil_c48436/f1p0/1994
GO:0009267	cellular response to starvation	biological_process	0.29851	1	3	3203	17	27707	0		3	i3_HQ_Rweevil_c1555/f5p0/3139,i0_LQ_Rweevil_c56772/f1p0/955,i3_HQ_Rweevil_c7963/f5p7/3143
GO:0031667	response to nutrient levels	biological_process	0.29851	1	3	3203	17	27707	0		3	i3_HQ_Rweevil_c7963/f5p7/3143,i3_HQ_Rweevil_c1555/f5p0/3139,i0_LQ_Rweevil_c56772/f1p0/955
GO:0031669	cellular response to nutrient levels	biological_process	0.29851	1	3	3203	17	27707	0		3	i3_HQ_Rweevil_c7963/f5p7/3143,i3_HQ_Rweevil_c1555/f5p0/3139,i0_LQ_Rweevil_c56772/f1p0/955
GO:0042594	response to starvation	biological_process	0.29851	1	3	3203	17	27707	0		3	i3_HQ_Rweevil_c7963/f5p7/3143,i3_HQ_Rweevil_c1555/f5p0/3139,i0_LQ_Rweevil_c56772/f1p0/955
GO:0005335	serotonin:sodium symporter activity	molecular_function	0.29941	1	1	3203	3	27707	1	i1_LQ_Rweevil_c67716/f1p0/1675	0
GO:0008504	monoamine transmembrane transporter activity	molecular_function	0.29941	1	1	3203	3	27707	1	i1_LQ_Rweevil_c67716/f1p0/1675	0
GO:0015222	serotonin transmembrane transporter activity	molecular_function	0.29941	1	1	3203	3	27707	1	i1_LQ_Rweevil_c67716/f1p0/1675	0
GO:1901618	organic hydroxy compound transmembrane transporter activity	molecular_function	0.29941	1	1	3203	3	27707	1	i1_LQ_Rweevil_c67716/f1p0/1675	0
GO:0016641	oxidoreductase activity, acting on the CH-NH2 group of donors, oxygen as acceptor	molecular_function	0.30022	1	3	3203	17	27707	3	i1_LQ_Rweevil_c54212/f1p4/1592,i1_LQ_Rweevil_c3611/f1p1/1639,i1_LQ_Rweevil_c44920/f1p0/1240	0
GO:0007586	digestion	biological_process	0.3005	1	1	3203	3	27707	1	i0_HQ_Rweevil_c11487/f2p22/580	0
GO:0051775	response to redox state	biological_process	0.30166	1	1	3203	3	27707	0		1	i0_LQ_Rweevil_c1872/f3p3/717
GO:0006743	ubiquinone metabolic process	biological_process	0.30328	1	1	3203	3	27707	0		1	i2_LQ_Rweevil_c113245/f1p3/2425
GO:0006744	ubiquinone biosynthetic process	biological_process	0.30328	1	1	3203	3	27707	0		1	i2_LQ_Rweevil_c113245/f1p3/2425
GO:0042181	ketone biosynthetic process	biological_process	0.30328	1	1	3203	3	27707	0		1	i2_LQ_Rweevil_c113245/f1p3/2425
GO:1901661	quinone metabolic process	biological_process	0.30328	1	1	3203	3	27707	0		1	i2_LQ_Rweevil_c113245/f1p3/2425
GO:1901663	quinone biosynthetic process	biological_process	0.30328	1	1	3203	3	27707	0		1	i2_LQ_Rweevil_c113245/f1p3/2425
GO:0051235	maintenance of location	biological_process	0.30442	1	5	3203	32	27707	1	i2_LQ_Rweevil_c58365/f1p10/1997	4	i1_HQ_Rweevil_c64473/f5p27/1152,i4_LQ_Rweevil_c9939/f1p2/5014,i4_HQ_Rweevil_c630/f11p0/4888,i5_LQ_Rweevil_c5160/f1p0/5009
GO:0003824	catalytic activity	molecular_function	0.30502	1	1347	3203	11528	27707	680	i0_LQ_Rweevil_c13562/f1p0/955,i2_LQ_Rweevil_c95618/f1p1/2064,i3_HQ_Rweevil_c4085/f2p0/3271,i0_HQ_Rweevil_c71790/f5p0/583,i1_LQ_Rweevil_c34353/f1p0/1023,i2_LQ_Rweevil_c82366/f1p8/2482,i3_HQ_Rweevil_c17540/f4p20/3813,i4_LQ_Rweevil_c11938/f1p0/4777,i3_HQ_Rweevil_c1268/f4p0/3447,i6_LQ_Rweevil_c866/f1p0/6998,i2_HQ_Rweevil_c22450/f2p3/2955,i11_LQ_Rweevil_c42/f1p0/11538,i1_LQ_Rweevil_c13334/f1p0/1571,i3…	667	i1_LQ_Rweevil_c11272/f1p7/1426,i2_LQ_Rweevil_c119152/f1p16/1930,i3_LQ_Rweevil_c9372/f1p10/3175,i3_HQ_Rweevil_c7602/f4p4/3449,i3_LQ_Rweevil_c25319/f1p10/3334,i2_LQ_Rweevil_c60623/f1p4/2902,i2_LQ_Rweevil_c84869/f1p68/2342,i4_LQ_Rweevil_c4993/f1p0/4393,i0_HQ_Rweevil_c918/f9p0/941,i3_HQ_Rweevil_c3471/f2p2/3969,i2_LQ_Rweevil_c3672/f1p15/2397,i4_HQ_Rweevil_c657/f10p0/4274,i2_HQ_Rweevil_c1597/f6p1/2632,…
GO:0004751	ribose-5-phosphate isomerase activity	molecular_function	0.30526	1	1	3203	3	27707	1	i2_LQ_Rweevil_c39475/f1p2/2722	0
GO:0009052	pentose-phosphate shunt, non-oxidative branch	biological_process	0.30526	1	1	3203	3	27707	1	i2_LQ_Rweevil_c39475/f1p2/2722	0
GO:0048856	anatomical structure development	biological_process	0.30772	1	28	3203	219	27707	9	i5_LQ_Rweevil_c1531/f1p3/5630,i1_LQ_Rweevil_c67077/f1p0/1989,i4_LQ_Rweevil_c6428/f1p4/4685,i0_LQ_Rweevil_c57882/f1p0/563,i1_LQ_Rweevil_c50155/f1p1/1754,i3_LQ_Rweevil_c12265/f1p37/3295,i2_LQ_Rweevil_c64985/f1p0/2158,i5_HQ_Rweevil_c557/f2p0/5530,i2_LQ_Rweevil_c55224/f1p4/2604	19	i2_LQ_Rweevil_c8368/f1p19/2381,i4_LQ_Rweevil_c13321/f1p11/4042,i5_LQ_Rweevil_c1020/f1p0/5164,i2_LQ_Rweevil_c18270/f1p8/2151,i2_HQ_Rweevil_c149866/f2p4/2256,i2_LQ_Rweevil_c85929/f1p1/2450,i1_HQ_Rweevil_c1480/f4p0/1212,i1_LQ_Rweevil_c28081/f1p0/1942,i2_LQ_Rweevil_c58118/f1p0/2812,i1_LQ_Rweevil_c28791/f1p0/1874,i4_LQ_Rweevil_c7155/f1p0/4814,i2_LQ_Rweevil_c54741/f1p0/2711,i2_LQ_Rweevil_c58418/f1p3/26…
GO:0005737	cytoplasm	cellular_component	0.30837	1	306	3203	2601	27707	152	i2_HQ_Rweevil_c78235/f2p2/2278,i2_LQ_Rweevil_c57464/f1p25/2964,i4_LQ_Rweevil_c7825/f1p6/4210,i2_LQ_Rweevil_c88404/f1p2/2427,i3_LQ_Rweevil_c23474/f1p6/3396,i2_LQ_Rweevil_c78683/f1p0/2308,i1_HQ_Rweevil_c121978/f2p0/1350,i2_LQ_Rweevil_c84552/f1p1/2275,i0_LQ_Rweevil_c73443/f1p0/576,i1_LQ_Rweevil_c12553/f1p11/1932,i5_LQ_Rweevil_c2078/f1p3/5390,i3_LQ_Rweevil_c35598/f1p0/3203,i4_HQ_Rweevil_c1588/f2p0/48…	154	i2_LQ_Rweevil_c116774/f1p1/2668,i1_LQ_Rweevil_c51305/f1p0/1834,i2_HQ_Rweevil_c10277/f5p0/2177,i3_HQ_Rweevil_c1886/f7p2/3577,i5_HQ_Rweevil_c124/f14p0/5357,i2_LQ_Rweevil_c6590/f1p2/2554,i2_LQ_Rweevil_c37114/f1p136/2538,i2_LQ_Rweevil_c85150/f1p6/2680,i0_LQ_Rweevil_c50503/f1p0/803,i1_HQ_Rweevil_c67115/f2p0/1678,i1_HQ_Rweevil_c790/f16p0/1607,i1_LQ_Rweevil_c16810/f1p0/1069,i3_LQ_Rweevil_c15089/f1p1/303…
GO:0000469	cleavage involved in rRNA processing	biological_process	0.30846	1	1	3203	3	27707	1	i1_LQ_Rweevil_c41686/f1p0/1542	0
GO:0009512	cytochrome b6f complex	cellular_component	0.31014	1	1	3203	3	27707	0		1	i2_LQ_Rweevil_c86378/f1p3/2200
GO:0043902	positive regulation of multi-organism process	biological_process	0.31042	1	1	3203	3	27707	1	i2_HQ_Rweevil_c60720/f3p2/2422	0
GO:0040001	establishment of mitotic spindle localization	biological_process	0.3106	1	1	3203	3	27707	0		1	i2_LQ_Rweevil_c38367/f1p5/2852
GO:0051293	establishment of spindle localization	biological_process	0.3106	1	1	3203	3	27707	0		1	i2_LQ_Rweevil_c38367/f1p5/2852
GO:0051653	spindle localization	biological_process	0.3106	1	1	3203	3	27707	0		1	i2_LQ_Rweevil_c38367/f1p5/2852
GO:0002532	production of molecular mediator involved in inflammatory response	biological_process	0.31061	1	1	3203	3	27707	0		1	i3_LQ_Rweevil_c22820/f1p0/3096
GO:0004896	cytokine receptor activity	molecular_function	0.31061	1	1	3203	3	27707	0		1	i3_LQ_Rweevil_c22820/f1p0/3096
GO:0098609	cell-cell adhesion	biological_process	0.31064	1	8	3203	54	27707	0		8	i6_LQ_Rweevil_c2210/f1p0/6062,i5_LQ_Rweevil_c2987/f1p3/5592,i3_LQ_Rweevil_c17700/f2p6/3381,i3_HQ_Rweevil_c40793/f26p0/3200,i9_LQ_Rweevil_c137/f1p0/9324,i4_LQ_Rweevil_c5576/f1p0/4591,i3_LQ_Rweevil_c19841/f1p0/3080,i11_LQ_Rweevil_c66/f1p0/11519
GO:0098742	cell-cell adhesion via plasma-membrane adhesion molecules	biological_process	0.31064	1	8	3203	54	27707	0		8	i6_LQ_Rweevil_c2210/f1p0/6062,i5_LQ_Rweevil_c2987/f1p3/5592,i3_HQ_Rweevil_c40793/f26p0/3200,i3_LQ_Rweevil_c17700/f2p6/3381,i9_LQ_Rweevil_c137/f1p0/9324,i4_LQ_Rweevil_c5576/f1p0/4591,i3_LQ_Rweevil_c19841/f1p0/3080,i11_LQ_Rweevil_c66/f1p0/11519
GO:0030493	bacteriochlorophyll metabolic process	biological_process	0.31065	1	1	3203	3	27707	0		1	i4_LQ_Rweevil_c8895/f1p0/4495
GO:0030494	bacteriochlorophyll biosynthetic process	biological_process	0.31065	1	1	3203	3	27707	0		1	i4_LQ_Rweevil_c8895/f1p0/4495
GO:0005976	polysaccharide metabolic process	biological_process	0.31136	1	10	3203	72	27707	2	i2_LQ_Rweevil_c9947/f1p8/2889,i2_HQ_Rweevil_c34506/f2p1/2172	8	i2_HQ_Rweevil_c47113/f2p13/2048,i5_LQ_Rweevil_c4651/f1p1/5382,i2_LQ_Rweevil_c38010/f1p4/2512,i2_LQ_Rweevil_c110094/f1p13/2480,i2_LQ_Rweevil_c49875/f1p14/2095,i2_LQ_Rweevil_c29757/f1p13/2068,i2_LQ_Rweevil_c69977/f1p13/2074,i2_HQ_Rweevil_c99536/f30p7/2798
GO:0016787	hydrolase activity	molecular_function	0.31154	1	629	3203	5341	27707	243	i3_HQ_Rweevil_c2046/f2p1/3370,i1_LQ_Rweevil_c50155/f1p1/1754,i3_LQ_Rweevil_c12702/f1p0/3834,i6_LQ_Rweevil_c1386/f1p2/6873,i2_LQ_Rweevil_c5064/f1p14/2218,i6_LQ_Rweevil_c606/f1p0/6968,i7_LQ_Rweevil_c551/f1p0/7327,i2_LQ_Rweevil_c77441/f1p6/2630,i4_HQ_Rweevil_c1584/f2p0/4697,i1_HQ_Rweevil_c7868/f2p0/1802,i2_LQ_Rweevil_c110995/f1p2/2222,i3_LQ_Rweevil_c8473/f1p61/3346,i4_LQ_Rweevil_c10657/f1p2/4801,i0_…	386	i2_HQ_Rweevil_c147752/f24p21/2935,i2_LQ_Rweevil_c29591/f1p2/2046,i5_HQ_Rweevil_c5312/f4p0/5132,i3_HQ_Rweevil_c31706/f3p0/3641,i1_LQ_Rweevil_c25289/f1p0/1177,i2_LQ_Rweevil_c22586/f1p38/2265,i3_HQ_Rweevil_c32084/f3p6/3128,i3_LQ_Rweevil_c5647/f1p0/3916,i3_HQ_Rweevil_c1557/f5p0/3841,i5_HQ_Rweevil_c5322/f2p0/5088,i1_LQ_Rweevil_c71682/f1p0/1951,i6_LQ_Rweevil_c939/f1p0/6709,i2_LQ_Rweevil_c64818/f1p16/24…
GO:0051715	cytolysis in other organism	biological_process	0.31258	1	1	3203	3	27707	0		1	i3_LQ_Rweevil_c5174/f1p6/3852
GO:0004656	procollagen-proline 4-dioxygenase activity	molecular_function	0.31279	1	3	3203	17	27707	2	i4_LQ_Rweevil_c7825/f1p6/4210,i2_LQ_Rweevil_c55224/f1p4/2604	1	i2_LQ_Rweevil_c95933/f1p3/2119
GO:0019798	procollagen-proline dioxygenase activity	molecular_function	0.31279	1	3	3203	17	27707	2	i4_LQ_Rweevil_c7825/f1p6/4210,i2_LQ_Rweevil_c55224/f1p4/2604	1	i2_LQ_Rweevil_c95933/f1p3/2119
GO:0031543	peptidyl-proline dioxygenase activity	molecular_function	0.31279	1	3	3203	17	27707	2	i2_LQ_Rweevil_c55224/f1p4/2604,i4_LQ_Rweevil_c7825/f1p6/4210	1	i2_LQ_Rweevil_c95933/f1p3/2119
GO:0031545	peptidyl-proline 4-dioxygenase activity	molecular_function	0.31279	1	3	3203	17	27707	2	i2_LQ_Rweevil_c55224/f1p4/2604,i4_LQ_Rweevil_c7825/f1p6/4210	1	i2_LQ_Rweevil_c95933/f1p3/2119
GO:0005984	disaccharide metabolic process	biological_process	0.31321	1	6	3203	40	27707	5	i3_LQ_Rweevil_c11128/f1p4/3153,i2_LQ_Rweevil_c84177/f1p13/3126,i3_HQ_Rweevil_c17946/f2p9/3378,i4_LQ_Rweevil_c5412/f1p0/4158,i1_LQ_Rweevil_c31482/f1p3/1487	1	i1_LQ_Rweevil_c28133/f1p0/1976
GO:0006275	regulation of DNA replication	biological_process	0.31364	1	3	3203	17	27707	2	i1_LQ_Rweevil_c40618/f1p0/1947,i2_HQ_Rweevil_c54169/f2p1/2233	1	i2_LQ_Rweevil_c111760/f1p2/2381
GO:0032940	secretion by cell	biological_process	0.31376	1	21	3203	161	27707	7	i1_LQ_Rweevil_c11288/f1p0/1630,i2_LQ_Rweevil_c108130/f1p1/2532,i2_LQ_Rweevil_c82033/f1p1/2682,i3_LQ_Rweevil_c20553/f1p0/3560,i7_LQ_Rweevil_c95/f1p0/7769,i2_LQ_Rweevil_c131809/f1p2/2679,i0_LQ_Rweevil_c52297/f1p0/776	14	i2_LQ_Rweevil_c80275/f1p2/2521,i2_HQ_Rweevil_c126113/f13p1/2521,i2_HQ_Rweevil_c74051/f16p4/2152,i1_LQ_Rweevil_c52567/f1p0/1507,i2_LQ_Rweevil_c41149/f1p2/2161,i2_LQ_Rweevil_c6590/f1p2/2554,i2_HQ_Rweevil_c17355/f4p2/2789,i2_HQ_Rweevil_c76145/f6p4/2553,i1_LQ_Rweevil_c52851/f1p0/1925,i2_LQ_Rweevil_c119152/f1p16/1930,i2_HQ_Rweevil_c139139/f3p18/2108,i2_LQ_Rweevil_c5957/f1p1/2558,i4_LQ_Rweevil_c7155/f1…
GO:0006605	protein targeting	biological_process	0.31678	1	43	3203	345	27707	17	i1_LQ_Rweevil_c67077/f1p0/1989,i8_LQ_Rweevil_c270/f1p0/8923,i5_LQ_Rweevil_c1823/f1p0/5203,i3_LQ_Rweevil_c11141/f1p3/3205,i4_LQ_Rweevil_c6287/f1p2/4650,i2_LQ_Rweevil_c55224/f1p4/2604,i4_LQ_Rweevil_c4177/f1p1/4420,i5_LQ_Rweevil_c1281/f1p0/5711,i5_LQ_Rweevil_c1162/f1p0/5267,i3_LQ_Rweevil_c4988/f1p0/3263,i1_LQ_Rweevil_c50155/f1p1/1754,i3_LQ_Rweevil_c24250/f1p0/3313,i0_HQ_Rweevil_c21555/f2p20/734,i2_L…	26	i2_LQ_Rweevil_c116774/f1p1/2668,i6_LQ_Rweevil_c2231/f1p0/6028,i2_LQ_Rweevil_c82722/f1p0/2507,i3_LQ_Rweevil_c27717/f1p0/3741,i2_LQ_Rweevil_c88626/f1p2/2735,i3_HQ_Rweevil_c1882/f5p0/3217,i2_LQ_Rweevil_c38367/f1p5/2852,i1_LQ_Rweevil_c43311/f1p0/1185,i3_HQ_Rweevil_c31743/f11p0/3123,i0_HQ_Rweevil_c881/f7p5/919,i2_HQ_Rweevil_c2548/f5p6/2424,i2_LQ_Rweevil_c85150/f1p6/2680,i6_LQ_Rweevil_c685/f1p0/6371,i2…
GO:0002064	epithelial cell development	biological_process	0.31694	1	2	3203	10	27707	1	i0_LQ_Rweevil_c57882/f1p0/563	1	i5_LQ_Rweevil_c1020/f1p0/5164
GO:0002065	columnar/cuboidal epithelial cell differentiation	biological_process	0.31694	1	2	3203	10	27707	1	i0_LQ_Rweevil_c57882/f1p0/563	1	i5_LQ_Rweevil_c1020/f1p0/5164
GO:0002066	columnar/cuboidal epithelial cell development	biological_process	0.31694	1	2	3203	10	27707	1	i0_LQ_Rweevil_c57882/f1p0/563	1	i5_LQ_Rweevil_c1020/f1p0/5164
GO:0005213	structural constituent of chorion	molecular_function	0.31694	1	2	3203	10	27707	1	i0_LQ_Rweevil_c57882/f1p0/563	1	i5_LQ_Rweevil_c1020/f1p0/5164
GO:0007281	germ cell development	biological_process	0.31694	1	2	3203	10	27707	1	i0_LQ_Rweevil_c57882/f1p0/563	1	i5_LQ_Rweevil_c1020/f1p0/5164
GO:0007292	female gamete generation	biological_process	0.31694	1	2	3203	10	27707	1	i0_LQ_Rweevil_c57882/f1p0/563	1	i5_LQ_Rweevil_c1020/f1p0/5164
GO:0007304	chorion-containing eggshell formation	biological_process	0.31694	1	2	3203	10	27707	1	i0_LQ_Rweevil_c57882/f1p0/563	1	i5_LQ_Rweevil_c1020/f1p0/5164
GO:0030703	eggshell formation	biological_process	0.31694	1	2	3203	10	27707	1	i0_LQ_Rweevil_c57882/f1p0/563	1	i5_LQ_Rweevil_c1020/f1p0/5164
GO:0030707	ovarian follicle cell development	biological_process	0.31694	1	2	3203	10	27707	1	i0_LQ_Rweevil_c57882/f1p0/563	1	i5_LQ_Rweevil_c1020/f1p0/5164
GO:0030855	epithelial cell differentiation	biological_process	0.31694	1	2	3203	10	27707	1	i0_LQ_Rweevil_c57882/f1p0/563	1	i5_LQ_Rweevil_c1020/f1p0/5164
GO:0048477	oogenesis	biological_process	0.31694	1	2	3203	10	27707	1	i0_LQ_Rweevil_c57882/f1p0/563	1	i5_LQ_Rweevil_c1020/f1p0/5164
GO:0060429	epithelium development	biological_process	0.31694	1	2	3203	10	27707	1	i0_LQ_Rweevil_c57882/f1p0/563	1	i5_LQ_Rweevil_c1020/f1p0/5164
GO:0005200	structural constituent of cytoskeleton	molecular_function	0.31701	1	5	3203	32	27707	2	i2_LQ_Rweevil_c58365/f1p10/1997,i1_LQ_Rweevil_c53573/f1p0/1907	3	i4_HQ_Rweevil_c877/f7p0/4503,i4_HQ_Rweevil_c1117/f4p0/4280,i2_HQ_Rweevil_c73812/f71p8/2921
GO:0005227	calcium activated cation channel activity	molecular_function	0.31778	1	2	3203	10	27707	0		2	i1_LQ_Rweevil_c77054/f1p0/1592,i2_LQ_Rweevil_c59048/f1p0/2825
GO:0015269	calcium-activated potassium channel activity	molecular_function	0.31778	1	2	3203	10	27707	0		2	i1_LQ_Rweevil_c77054/f1p0/1592,i2_LQ_Rweevil_c59048/f1p0/2825
GO:0022839	ion gated channel activity	molecular_function	0.31778	1	2	3203	10	27707	0		2	i1_LQ_Rweevil_c77054/f1p0/1592,i2_LQ_Rweevil_c59048/f1p0/2825
GO:0005581	collagen trimer	cellular_component	0.31817	1	3	3203	17	27707	0		3	i5_LQ_Rweevil_c2967/f1p0/5750,i4_LQ_Rweevil_c11515/f1p0/4582,i3_HQ_Rweevil_c17597/f3p0/3093
GO:0046870	cadmium ion binding	molecular_function	0.3185	1	3	3203	17	27707	1	i2_LQ_Rweevil_c153769/f1p8/2884	2	i2_LQ_Rweevil_c85130/f1p0/2686,i2_LQ_Rweevil_c24555/f1p5/2795
GO:0003887	DNA-directed DNA polymerase activity	molecular_function	0.32222	1	8	3203	56	27707	7	i4_LQ_Rweevil_c5278/f1p0/4368,i6_LQ_Rweevil_c649/f1p0/6185,i2_LQ_Rweevil_c24528/f1p4/2855,i2_LQ_Rweevil_c14795/f1p4/2163,i2_LQ_Rweevil_c20277/f1p7/2549,i1_LQ_Rweevil_c7216/f1p0/1761,i2_HQ_Rweevil_c147837/f3p5/2250	1	i3_LQ_Rweevil_c27022/f1p4/3956
GO:0045116	protein neddylation	biological_process	0.32286	1	3	3203	17	27707	0		3	i3_HQ_Rweevil_c17239/f4p0/3170,i2_HQ_Rweevil_c147409/f14p10/2426,i2_LQ_Rweevil_c64995/f1p5/2628
GO:0005768	endosome	cellular_component	0.32302	1	4	3203	25	27707	4	i2_LQ_Rweevil_c41102/f1p0/2205,i5_LQ_Rweevil_c4709/f1p0/5346,i3_LQ_Rweevil_c26421/f1p0/3357,i2_LQ_Rweevil_c78683/f1p0/2308	0
GO:0044440	endosomal part	cellular_component	0.32302	1	4	3203	25	27707	4	i3_LQ_Rweevil_c26421/f1p0/3357,i5_LQ_Rweevil_c4709/f1p0/5346,i2_LQ_Rweevil_c41102/f1p0/2205,i2_LQ_Rweevil_c78683/f1p0/2308	0
GO:0016624	oxidoreductase activity, acting on the aldehyde or oxo group of donors, disulfide as acceptor	molecular_function	0.32348	1	8	3203	56	27707	8	i4_LQ_Rweevil_c3381/f1p0/4400,i3_LQ_Rweevil_c36811/f1p0/3632,i2_LQ_Rweevil_c45247/f1p38/3003,i3_HQ_Rweevil_c11789/f3p0/3626,i3_LQ_Rweevil_c18031/f1p0/3665,i2_LQ_Rweevil_c104958/f1p10/2300,i2_HQ_Rweevil_c36014/f4p25/2315,i3_LQ_Rweevil_c6352/f1p24/3995	0
GO:0034450	ubiquitin-ubiquitin ligase activity	molecular_function	0.324	1	3	3203	17	27707	0		3	i5_LQ_Rweevil_c3771/f1p8/5368,i5_LQ_Rweevil_c1155/f1p0/5261,i4_LQ_Rweevil_c9870/f1p0/4445
GO:0030472	mitotic spindle organization in nucleus	biological_process	0.32494	1	2	3203	10	27707	1	i3_LQ_Rweevil_c39396/f1p0/3083	1	i1_HQ_Rweevil_c1101/f24p0/1812
GO:0016620	oxidoreductase activity, acting on the aldehyde or oxo group of donors, NAD or NADP as acceptor	molecular_function	0.32509	1	6	3203	41	27707	0		6	i2_HQ_Rweevil_c32609/f42p3/2072,i3_LQ_Rweevil_c25589/f1p0/3141,i1_LQ_Rweevil_c7756/f1p0/1680,i3_HQ_Rweevil_c1440/f7p0/3196,i2_LQ_Rweevil_c108645/f1p6/2872,i2_LQ_Rweevil_c94917/f1p6/1981
GO:1902580	single-organism cellular localization	biological_process	0.32524	1	47	3203	380	27707	17	i3_LQ_Rweevil_c11141/f1p3/3205,i1_LQ_Rweevil_c67077/f1p0/1989,i8_LQ_Rweevil_c270/f1p0/8923,i5_LQ_Rweevil_c1823/f1p0/5203,i2_LQ_Rweevil_c55224/f1p4/2604,i4_LQ_Rweevil_c4177/f1p1/4420,i4_LQ_Rweevil_c6287/f1p2/4650,i5_LQ_Rweevil_c1281/f1p0/5711,i5_LQ_Rweevil_c1162/f1p0/5267,i1_LQ_Rweevil_c50155/f1p1/1754,i3_LQ_Rweevil_c24250/f1p0/3313,i3_LQ_Rweevil_c4988/f1p0/3263,i0_HQ_Rweevil_c21555/f2p20/734,i1_L…	30	i2_LQ_Rweevil_c82722/f1p0/2507,i3_LQ_Rweevil_c27717/f1p0/3741,i2_LQ_Rweevil_c88626/f1p2/2735,i3_HQ_Rweevil_c1882/f5p0/3217,i6_LQ_Rweevil_c2231/f1p0/6028,i2_LQ_Rweevil_c116774/f1p1/2668,i2_LQ_Rweevil_c38367/f1p5/2852,i1_LQ_Rweevil_c43311/f1p0/1185,i4_LQ_Rweevil_c11680/f1p0/4123,i0_HQ_Rweevil_c881/f7p5/919,i2_LQ_Rweevil_c461/f49p8/2881,i3_HQ_Rweevil_c31743/f11p0/3123,i1_LQ_Rweevil_c24749/f1p0/1156,…
GO:0070603	SWI/SNF superfamily-type complex	cellular_component	0.32536	1	2	3203	10	27707	0		2	i3_LQ_Rweevil_c22338/f1p0/3758,i4_LQ_Rweevil_c8293/f1p0/4566
GO:0008200	ion channel inhibitor activity	molecular_function	0.32631	1	3	3203	18	27707	1	i2_LQ_Rweevil_c19793/f1p2/2470	2	i1_LQ_Rweevil_c24749/f1p0/1156,i0_HQ_Rweevil_c1733/f4p0/381
GO:0016247	channel regulator activity	molecular_function	0.32631	1	3	3203	18	27707	1	i2_LQ_Rweevil_c19793/f1p2/2470	2	i1_LQ_Rweevil_c24749/f1p0/1156,i0_HQ_Rweevil_c1733/f4p0/381
GO:0016248	channel inhibitor activity	molecular_function	0.32631	1	3	3203	18	27707	1	i2_LQ_Rweevil_c19793/f1p2/2470	2	i1_LQ_Rweevil_c24749/f1p0/1156,i0_HQ_Rweevil_c1733/f4p0/381
GO:0015643	toxic substance binding	molecular_function	0.32772	1	2	3203	10	27707	2	i2_LQ_Rweevil_c108502/f1p2/2897,i2_HQ_Rweevil_c91620/f2p0/2057	0
GO:0003995	acyl-CoA dehydrogenase activity	molecular_function	0.32838	1	10	3203	73	27707	10	i1_LQ_Rweevil_c77146/f1p0/1467,i1_LQ_Rweevil_c8941/f1p85/1467,i2_LQ_Rweevil_c37895/f1p1/2427,i1_HQ_Rweevil_c19229/f3p0/1690,i2_LQ_Rweevil_c39395/f1p2/2199,i1_LQ_Rweevil_c76259/f1p0/1922,i2_HQ_Rweevil_c64353/f2p3/2352,i1_LQ_Rweevil_c21982/f1p5/1650,i1_LQ_Rweevil_c22298/f1p2/1607,i4_LQ_Rweevil_c11709/f1p1/4172	0
GO:0008770	[acyl-carrier-protein] phosphodiesterase activity	molecular_function	0.32938	1	2	3203	10	27707	2	i2_LQ_Rweevil_c84177/f1p13/3126,i3_HQ_Rweevil_c17946/f2p9/3378	0
GO:0000184	nuclear-transcribed mRNA catabolic process, nonsense-mediated decay	biological_process	0.331	1	4	3203	25	27707	3	i2_LQ_Rweevil_c4191/f1p1/2577,i4_LQ_Rweevil_c10172/f1p0/4346,i2_LQ_Rweevil_c136889/f1p1/2782	1	i2_LQ_Rweevil_c87144/f1p1/2683
GO:0005201	extracellular matrix structural constituent	molecular_function	0.33144	1	4	3203	25	27707	0		4	i1_HQ_Rweevil_c2494/f2p0/1402,i3_HQ_Rweevil_c17597/f3p0/3093,i4_LQ_Rweevil_c11515/f1p0/4582,i5_LQ_Rweevil_c2967/f1p0/5750
GO:0044877	macromolecular complex binding	molecular_function	0.33252	1	80	3203	655	27707	31	i2_LQ_Rweevil_c155015/f1p6/2694,i3_LQ_Rweevil_c5680/f1p0/3407,i3_LQ_Rweevil_c24250/f1p0/3313,i9_LQ_Rweevil_c65/f1p0/9271,i2_LQ_Rweevil_c98680/f1p11/2728,i6_LQ_Rweevil_c1852/f1p0/6241,i2_LQ_Rweevil_c58365/f1p10/1997,i3_LQ_Rweevil_c6953/f1p0/3151,i2_LQ_Rweevil_c57464/f1p25/2964,i1_LQ_Rweevil_c67077/f1p0/1989,i4_LQ_Rweevil_c12972/f1p60/4077,i3_LQ_Rweevil_c19706/f1p0/3069,i2_LQ_Rweevil_c109811/f1p22/…	49	i2_LQ_Rweevil_c109220/f1p20/2862,i1_LQ_Rweevil_c41884/f1p1/1284,i2_LQ_Rweevil_c25892/f1p5/2956,i3_LQ_Rweevil_c21179/f1p0/3999,i1_LQ_Rweevil_c122058/f1p0/1120,i3_LQ_Rweevil_c27729/f1p0/3111,i3_HQ_Rweevil_c40313/f44p0/3467,i3_LQ_Rweevil_c12706/f1p0/3088,i2_LQ_Rweevil_c57117/f1p11/2230,i2_LQ_Rweevil_c4086/f1p6/2996,i2_LQ_Rweevil_c24813/f1p1/2432,i3_LQ_Rweevil_c12603/f1p0/3377,i2_LQ_Rweevil_c31521/f1…
GO:0016684	oxidoreductase activity, acting on peroxide as acceptor	molecular_function	0.33254	1	5	3203	34	27707	0		5	i0_LQ_Rweevil_c14258/f1p0/759,i2_HQ_Rweevil_c11456/f3p9/2901,i1_HQ_Rweevil_c12244/f3p6/1652,i2_LQ_Rweevil_c80810/f1p39/2718,i2_HQ_Rweevil_c12174/f3p38/2661
GO:0031012	extracellular matrix	cellular_component	0.33258	1	21	3203	163	27707	3	i3_LQ_Rweevil_c29869/f1p0/3050,i4_LQ_Rweevil_c11311/f1p0/4458,i5_LQ_Rweevil_c4297/f1p0/6130	18	i3_LQ_Rweevil_c8675/f1p0/3317,i2_LQ_Rweevil_c14857/f1p1/2035,i2_HQ_Rweevil_c146831/f12p0/2513,i3_HQ_Rweevil_c40266/f6p0/3158,i4_HQ_Rweevil_c1091/f4p0/4799,i5_LQ_Rweevil_c1587/f1p0/5064,i2_LQ_Rweevil_c108752/f1p3/2143,i2_LQ_Rweevil_c26670/f1p4/2865,i3_HQ_Rweevil_c40854/f21p9/3218,i3_LQ_Rweevil_c15016/f1p6/3063,i1_LQ_Rweevil_c23995/f1p0/1977,i2_LQ_Rweevil_c17880/f1p2/2309,i5_LQ_Rweevil_c4802/f1p0/5…
GO:1901136	carbohydrate derivative catabolic process	biological_process	0.33409	1	11	3203	81	27707	8	i1_LQ_Rweevil_c65508/f1p0/1426,i2_LQ_Rweevil_c164541/f1p10/2003,i1_HQ_Rweevil_c141117/f3p0/1678,i4_LQ_Rweevil_c10031/f1p0/4585,i1_HQ_Rweevil_c20209/f2p0/1783,i3_HQ_Rweevil_c17540/f4p20/3813,i3_HQ_Rweevil_c4085/f2p0/3271,i1_HQ_Rweevil_c120705/f5p0/1946	3	i1_LQ_Rweevil_c51913/f1p0/1998,i3_LQ_Rweevil_c34470/f1p0/3107,i1_LQ_Rweevil_c51305/f1p0/1834
GO:0005773	vacuole	cellular_component	0.33792	1	13	3203	97	27707	10	i4_LQ_Rweevil_c8323/f1p263/4781,i2_LQ_Rweevil_c23530/f1p2/2987,i4_LQ_Rweevil_c4424/f1p3/4454,i4_HQ_Rweevil_c1588/f2p0/4834,i2_LQ_Rweevil_c77628/f1p8/3057,i2_LQ_Rweevil_c78683/f1p0/2308,i4_HQ_Rweevil_c1333/f3p0/4503,i2_LQ_Rweevil_c41102/f1p0/2205,i2_LQ_Rweevil_c5851/f1p12/2177,i3_LQ_Rweevil_c26421/f1p0/3357	3	i2_LQ_Rweevil_c38367/f1p5/2852,i4_LQ_Rweevil_c9767/f1p0/4699,i2_LQ_Rweevil_c88626/f1p2/2735
GO:0006364	rRNA processing	biological_process	0.33896	1	13	3203	98	27707	7	i3_HQ_Rweevil_c1268/f4p0/3447,i1_LQ_Rweevil_c71593/f1p0/1725,i4_LQ_Rweevil_c9189/f1p0/4565,i1_HQ_Rweevil_c14225/f2p0/1191,i8_HQ_Rweevil_c15/f2p0/8531,i3_LQ_Rweevil_c35995/f1p0/3092,i1_LQ_Rweevil_c41686/f1p0/1542	6	i2_LQ_Rweevil_c84030/f1p25/2927,i2_LQ_Rweevil_c39495/f1p2/2629,i0_HQ_Rweevil_c15261/f3p0/917,i3_LQ_Rweevil_c35778/f1p5/3122,i3_HQ_Rweevil_c2031/f2p0/3498,i1_LQ_Rweevil_c130452/f1p0/1091
GO:0016072	rRNA metabolic process	biological_process	0.33896	1	13	3203	98	27707	7	i1_HQ_Rweevil_c14225/f2p0/1191,i8_HQ_Rweevil_c15/f2p0/8531,i3_LQ_Rweevil_c35995/f1p0/3092,i1_LQ_Rweevil_c41686/f1p0/1542,i3_HQ_Rweevil_c1268/f4p0/3447,i1_LQ_Rweevil_c71593/f1p0/1725,i4_LQ_Rweevil_c9189/f1p0/4565	6	i3_HQ_Rweevil_c2031/f2p0/3498,i1_LQ_Rweevil_c130452/f1p0/1091,i2_LQ_Rweevil_c39495/f1p2/2629,i2_LQ_Rweevil_c84030/f1p25/2927,i0_HQ_Rweevil_c15261/f3p0/917,i3_LQ_Rweevil_c35778/f1p5/3122
GO:0046873	metal ion transmembrane transporter activity	molecular_function	0.34098	1	49	3203	399	27707	33	i5_LQ_Rweevil_c3893/f1p6/5592,i5_HQ_Rweevil_c241/f5p0/5603,i5_LQ_Rweevil_c3209/f1p0/5482,i2_LQ_Rweevil_c19793/f1p2/2470,i7_LQ_Rweevil_c551/f1p0/7327,i5_LQ_Rweevil_c3578/f1p0/5624,i1_LQ_Rweevil_c8453/f1p2/1955,i1_LQ_Rweevil_c7216/f1p0/1761,i5_LQ_Rweevil_c929/f1p0/5947,i3_HQ_Rweevil_c1899/f3p3/3226,i9_LQ_Rweevil_c83/f1p0/9799,i3_LQ_Rweevil_c36265/f1p0/3285,i0_LQ_Rweevil_c10200/f1p12/710,i6_LQ_Rweev…	16	i2_LQ_Rweevil_c112147/f1p2/2308,i1_LQ_Rweevil_c45899/f1p0/1916,i3_LQ_Rweevil_c7034/f2p0/3847,i4_LQ_Rweevil_c7820/f1p0/4446,i2_LQ_Rweevil_c59048/f1p0/2825,i1_LQ_Rweevil_c53458/f1p0/1733,i0_HQ_Rweevil_c1204/f6p3/814,i1_HQ_Rweevil_c51472/f2p0/1636,i2_HQ_Rweevil_c51491/f15p5/2116,i2_LQ_Rweevil_c37484/f1p13/2963,i3_LQ_Rweevil_c28594/f1p0/3183,i1_LQ_Rweevil_c77054/f1p0/1592,i1_LQ_Rweevil_c11386/f1p0/15…
GO:0016054	organic acid catabolic process	biological_process	0.34108	1	9	3203	65	27707	6	i1_LQ_Rweevil_c6712/f1p0/1175,i4_LQ_Rweevil_c5997/f1p1/4781,i3_LQ_Rweevil_c6668/f1p0/3161,i3_LQ_Rweevil_c23226/f1p0/3675,i2_LQ_Rweevil_c25225/f1p8/2143,i1_LQ_Rweevil_c11458/f1p0/1570	3	i0_LQ_Rweevil_c60066/f1p0/893,i2_LQ_Rweevil_c22765/f1p28/2229,i3_LQ_Rweevil_c37002/f1p1/3256
GO:0046395	carboxylic acid catabolic process	biological_process	0.34108	1	9	3203	65	27707	6	i3_LQ_Rweevil_c23226/f1p0/3675,i2_LQ_Rweevil_c25225/f1p8/2143,i1_LQ_Rweevil_c11458/f1p0/1570,i1_LQ_Rweevil_c6712/f1p0/1175,i4_LQ_Rweevil_c5997/f1p1/4781,i3_LQ_Rweevil_c6668/f1p0/3161	3	i2_LQ_Rweevil_c22765/f1p28/2229,i3_LQ_Rweevil_c37002/f1p1/3256,i0_LQ_Rweevil_c60066/f1p0/893
GO:0016011	dystroglycan complex	cellular_component	0.34239	1	3	3203	18	27707	0		3	i4_LQ_Rweevil_c5122/f1p0/4699,i4_HQ_Rweevil_c744/f9p0/4431,i4_LQ_Rweevil_c8501/f1p0/4626
GO:0016012	sarcoglycan complex	cellular_component	0.34239	1	3	3203	18	27707	0		3	i4_LQ_Rweevil_c5122/f1p0/4699,i4_HQ_Rweevil_c744/f9p0/4431,i4_LQ_Rweevil_c8501/f1p0/4626
GO:0002252	immune effector process	biological_process	0.34739	1	10	3203	74	27707	7	i5_LQ_Rweevil_c1162/f1p0/5267,i1_LQ_Rweevil_c30154/f1p0/1691,i1_LQ_Rweevil_c67077/f1p0/1989,i1_LQ_Rweevil_c6852/f1p0/1890,i1_LQ_Rweevil_c50155/f1p1/1754,i2_LQ_Rweevil_c36307/f1p17/2632,i2_LQ_Rweevil_c6147/f1p3/2880	3	i2_HQ_Rweevil_c139473/f2p8/2032,i2_HQ_Rweevil_c11146/f2p0/2776,i3_LQ_Rweevil_c5647/f1p0/3916
GO:0051607	defense response to virus	biological_process	0.34739	1	10	3203	74	27707	7	i2_LQ_Rweevil_c6147/f1p3/2880,i2_LQ_Rweevil_c36307/f1p17/2632,i1_LQ_Rweevil_c50155/f1p1/1754,i1_LQ_Rweevil_c6852/f1p0/1890,i1_LQ_Rweevil_c67077/f1p0/1989,i1_LQ_Rweevil_c30154/f1p0/1691,i5_LQ_Rweevil_c1162/f1p0/5267	3	i3_LQ_Rweevil_c5647/f1p0/3916,i2_HQ_Rweevil_c11146/f2p0/2776,i2_HQ_Rweevil_c139473/f2p8/2032
GO:0044033	multi-organism metabolic process	biological_process	0.34877	1	4	3203	26	27707	2	i2_LQ_Rweevil_c79177/f1p0/2681,i1_LQ_Rweevil_c54239/f1p0/1755	2	i2_LQ_Rweevil_c142681/f1p1/2102,i2_LQ_Rweevil_c59462/f1p1/2443
GO:0009056	catabolic process	biological_process	0.34977	1	142	3203	1187	27707	72	i2_LQ_Rweevil_c6147/f1p3/2880,i1_LQ_Rweevil_c50155/f1p1/1754,i3_HQ_Rweevil_c17540/f4p20/3813,i2_LQ_Rweevil_c164541/f1p10/2003,i2_LQ_Rweevil_c44954/f1p3/2376,i3_HQ_Rweevil_c43053/f7p77/3209,i3_HQ_Rweevil_c4085/f2p0/3271,i3_LQ_Rweevil_c26421/f1p0/3357,i2_LQ_Rweevil_c22248/f1p8/2290,i1_LQ_Rweevil_c51779/f1p0/1766,i4_LQ_Rweevil_c2139/f1p0/4293,i1_LQ_Rweevil_c48518/f1p0/1916,i2_LQ_Rweevil_c36307/f1p17…	70	i3_LQ_Rweevil_c5647/f1p0/3916,i2_LQ_Rweevil_c154820/f1p6/2288,i0_HQ_Rweevil_c918/f9p0/941,i5_LQ_Rweevil_c1155/f1p0/5261,i3_LQ_Rweevil_c43158/f1p0/3009,i2_LQ_Rweevil_c29591/f1p2/2046,i0_LQ_Rweevil_c60066/f1p0/893,i0_HQ_Rweevil_c162/f18p0/926,i2_LQ_Rweevil_c109206/f1p7/2679,i3_LQ_Rweevil_c37002/f1p1/3256,i1_HQ_Rweevil_c2505/f7p0/1944,i1_HQ_Rweevil_c83590/f11p3/1118,i3_HQ_Rweevil_c1882/f5p0/3217,i3_…
GO:0005085	guanyl-nucleotide exchange factor activity	molecular_function	0.34988	1	26	3203	204	27707	12	i2_LQ_Rweevil_c3286/f1p32/2374,i2_LQ_Rweevil_c135544/f1p43/2975,i4_HQ_Rweevil_c14081/f3p0/4198,i2_LQ_Rweevil_c113219/f1p8/2384,i2_LQ_Rweevil_c108502/f1p2/2897,i3_LQ_Rweevil_c3527/f1p0/3601,i7_LQ_Rweevil_c915/f1p0/7979,i6_LQ_Rweevil_c743/f1p0/6626,i3_LQ_Rweevil_c18949/f1p0/3593,i2_LQ_Rweevil_c6991/f1p33/2179,i3_LQ_Rweevil_c26074/f1p0/3888,i3_LQ_Rweevil_c10116/f1p0/3510	14	i2_LQ_Rweevil_c15036/f1p1/2042,i4_LQ_Rweevil_c4768/f1p19/4198,i6_LQ_Rweevil_c1689/f1p0/6908,i2_LQ_Rweevil_c41852/f1p3/3616,i5_HQ_Rweevil_c213/f6p0/5383,i3_HQ_Rweevil_c12704/f2p0/3187,i4_LQ_Rweevil_c10297/f1p3/4685,i2_LQ_Rweevil_c115222/f1p4/2301,i4_LQ_Rweevil_c11796/f1p0/4553,i3_LQ_Rweevil_c30320/f1p0/3789,i2_LQ_Rweevil_c110667/f1p2/2742,i4_LQ_Rweevil_c11691/f1p80/4162,i2_LQ_Rweevil_c57749/f1p1/2…
GO:0000502	proteasome complex	cellular_component	0.35043	1	6	3203	43	27707	1	i3_LQ_Rweevil_c17826/f1p12/3177	5	i0_HQ_Rweevil_c663/f8p0/839,i0_HQ_Rweevil_c162/f18p0/926,i1_HQ_Rweevil_c83590/f11p3/1118,i0_HQ_Rweevil_c918/f9p0/941,i1_HQ_Rweevil_c109553/f4p0/1083
GO:0005815	microtubule organizing center	cellular_component	0.35055	1	13	3203	98	27707	5	i3_LQ_Rweevil_c24250/f1p0/3313,i3_HQ_Rweevil_c19173/f2p0/3599,i3_LQ_Rweevil_c41812/f1p0/3663,i3_LQ_Rweevil_c21417/f1p6/3230,i1_LQ_Rweevil_c53573/f1p0/1907	8	i2_LQ_Rweevil_c115091/f1p20/2356,i3_LQ_Rweevil_c12587/f1p0/3810,i4_HQ_Rweevil_c877/f7p0/4503,i2_HQ_Rweevil_c11146/f2p0/2776,i2_LQ_Rweevil_c43263/f2p0/2838,i4_HQ_Rweevil_c1117/f4p0/4280,i2_HQ_Rweevil_c73812/f71p8/2921,i3_LQ_Rweevil_c42008/f1p39/3589
GO:2001070	starch binding	molecular_function	0.35123	1	4	3203	26	27707	4	i3_LQ_Rweevil_c36372/f1p0/3295,i2_LQ_Rweevil_c61717/f1p11/2209,i3_HQ_Rweevil_c39296/f2p1/3465,i3_HQ_Rweevil_c2046/f2p1/3370	0
GO:0016831	carboxy-lyase activity	molecular_function	0.35179	1	22	3203	173	27707	14	i6_LQ_Rweevil_c1792/f1p0/6564,i2_LQ_Rweevil_c43689/f1p265/2294,i5_LQ_Rweevil_c1961/f1p0/5467,i2_LQ_Rweevil_c19793/f1p2/2470,i0_LQ_Rweevil_c23142/f1p0/848,i5_LQ_Rweevil_c453/f2p0/5419,i1_HQ_Rweevil_c1216/f13p0/1908,i5_LQ_Rweevil_c929/f1p0/5947,i2_HQ_Rweevil_c147351/f6p10/2079,i5_LQ_Rweevil_c3146/f1p0/5388,i0_LQ_Rweevil_c27279/f1p3/610,i2_LQ_Rweevil_c106705/f1p2/2917,i2_LQ_Rweevil_c85075/f1p85/3024…	8	i2_HQ_Rweevil_c99702/f18p1/2371,i2_LQ_Rweevil_c60034/f1p2/2191,i2_LQ_Rweevil_c37484/f1p13/2963,i2_HQ_Rweevil_c73820/f17p1/2269,i2_LQ_Rweevil_c133578/f1p2/2390,i2_HQ_Rweevil_c1810/f21p0/2408,i3_LQ_Rweevil_c27781/f1p1/4007,i3_LQ_Rweevil_c4248/f1p0/3458
GO:0005747	mitochondrial respiratory chain complex I	cellular_component	0.35243	1	2	3203	11	27707	1	i0_HQ_Rweevil_c1230/f6p0/455	1	i3_LQ_Rweevil_c28594/f1p0/3183
GO:0030964	NADH dehydrogenase complex	cellular_component	0.35243	1	2	3203	11	27707	1	i0_HQ_Rweevil_c1230/f6p0/455	1	i3_LQ_Rweevil_c28594/f1p0/3183
GO:0045271	respiratory chain complex I	cellular_component	0.35243	1	2	3203	11	27707	1	i0_HQ_Rweevil_c1230/f6p0/455	1	i3_LQ_Rweevil_c28594/f1p0/3183
GO:0000921	septin ring assembly	biological_process	0.35308	1	13	3203	99	27707	11	i1_LQ_Rweevil_c30154/f1p0/1691,i8_LQ_Rweevil_c270/f1p0/8923,i1_LQ_Rweevil_c14992/f1p10/1123,i1_LQ_Rweevil_c67077/f1p0/1989,i1_LQ_Rweevil_c67604/f1p0/1751,i5_LQ_Rweevil_c1162/f1p0/5267,i3_LQ_Rweevil_c26367/f1p3/3224,i2_LQ_Rweevil_c36307/f1p17/2632,i3_LQ_Rweevil_c10352/f1p1/3385,i1_LQ_Rweevil_c6852/f1p0/1890,i1_LQ_Rweevil_c50155/f1p1/1754	2	i2_LQ_Rweevil_c108261/f1p2/2820,i3_LQ_Rweevil_c5647/f1p0/3916
GO:0005940	septin ring	cellular_component	0.35308	1	13	3203	99	27707	11	i3_LQ_Rweevil_c10352/f1p1/3385,i2_LQ_Rweevil_c36307/f1p17/2632,i1_LQ_Rweevil_c50155/f1p1/1754,i1_LQ_Rweevil_c6852/f1p0/1890,i1_LQ_Rweevil_c67604/f1p0/1751,i1_LQ_Rweevil_c67077/f1p0/1989,i1_LQ_Rweevil_c14992/f1p10/1123,i8_LQ_Rweevil_c270/f1p0/8923,i1_LQ_Rweevil_c30154/f1p0/1691,i3_LQ_Rweevil_c26367/f1p3/3224,i5_LQ_Rweevil_c1162/f1p0/5267	2	i3_LQ_Rweevil_c5647/f1p0/3916,i2_LQ_Rweevil_c108261/f1p2/2820
GO:0031106	septin ring organization	biological_process	0.35308	1	13	3203	99	27707	11	i1_LQ_Rweevil_c50155/f1p1/1754,i1_LQ_Rweevil_c6852/f1p0/1890,i3_LQ_Rweevil_c10352/f1p1/3385,i2_LQ_Rweevil_c36307/f1p17/2632,i3_LQ_Rweevil_c26367/f1p3/3224,i5_LQ_Rweevil_c1162/f1p0/5267,i1_LQ_Rweevil_c67077/f1p0/1989,i1_LQ_Rweevil_c67604/f1p0/1751,i1_LQ_Rweevil_c14992/f1p10/1123,i8_LQ_Rweevil_c270/f1p0/8923,i1_LQ_Rweevil_c30154/f1p0/1691	2	i3_LQ_Rweevil_c5647/f1p0/3916,i2_LQ_Rweevil_c108261/f1p2/2820
GO:0032156	septin cytoskeleton	cellular_component	0.35308	1	13	3203	99	27707	11	i3_LQ_Rweevil_c10352/f1p1/3385,i2_LQ_Rweevil_c36307/f1p17/2632,i1_LQ_Rweevil_c50155/f1p1/1754,i1_LQ_Rweevil_c6852/f1p0/1890,i1_LQ_Rweevil_c67077/f1p0/1989,i1_LQ_Rweevil_c67604/f1p0/1751,i1_LQ_Rweevil_c14992/f1p10/1123,i8_LQ_Rweevil_c270/f1p0/8923,i1_LQ_Rweevil_c30154/f1p0/1691,i3_LQ_Rweevil_c26367/f1p3/3224,i5_LQ_Rweevil_c1162/f1p0/5267	2	i3_LQ_Rweevil_c5647/f1p0/3916,i2_LQ_Rweevil_c108261/f1p2/2820
GO:0032185	septin cytoskeleton organization	biological_process	0.35308	1	13	3203	99	27707	11	i5_LQ_Rweevil_c1162/f1p0/5267,i3_LQ_Rweevil_c26367/f1p3/3224,i8_LQ_Rweevil_c270/f1p0/8923,i1_LQ_Rweevil_c30154/f1p0/1691,i1_LQ_Rweevil_c67604/f1p0/1751,i1_LQ_Rweevil_c67077/f1p0/1989,i1_LQ_Rweevil_c14992/f1p10/1123,i1_LQ_Rweevil_c6852/f1p0/1890,i1_LQ_Rweevil_c50155/f1p1/1754,i3_LQ_Rweevil_c10352/f1p1/3385,i2_LQ_Rweevil_c36307/f1p17/2632	2	i2_LQ_Rweevil_c108261/f1p2/2820,i3_LQ_Rweevil_c5647/f1p0/3916
GO:0004177	aminopeptidase activity	molecular_function	0.35309	1	5	3203	34	27707	2	i2_LQ_Rweevil_c110995/f1p2/2222,i2_LQ_Rweevil_c10446/f1p1/2544	3	i0_LQ_Rweevil_c1872/f3p3/717,i2_LQ_Rweevil_c45069/f1p1/2538,i1_HQ_Rweevil_c17184/f17p0/1872
GO:0044429	mitochondrial part	cellular_component	0.35396	1	38	3203	313	27707	20	i6_LQ_Rweevil_c825/f1p16/6429,i4_LQ_Rweevil_c11169/f1p53/4817,i0_HQ_Rweevil_c1230/f6p0/455,i0_LQ_Rweevil_c3572/f1p0/757,i2_LQ_Rweevil_c42813/f1p13/3584,i2_HQ_Rweevil_c78235/f2p2/2278,i1_LQ_Rweevil_c22697/f1p0/1478,i3_HQ_Rweevil_c17573/f2p2/3639,i0_HQ_Rweevil_c989/f12p0/562,i3_LQ_Rweevil_c7653/f1p0/3118,i0_LQ_Rweevil_c33680/f1p0/515,i2_LQ_Rweevil_c110995/f1p2/2222,i1_LQ_Rweevil_c5987/f1p0/1730,i2_…	18	i4_LQ_Rweevil_c10272/f1p0/4664,i6_LQ_Rweevil_c2231/f1p0/6028,i3_HQ_Rweevil_c1882/f5p0/3217,i2_LQ_Rweevil_c88973/f1p4/2732,i2_HQ_Rweevil_c73812/f71p8/2921,i4_LQ_Rweevil_c2651/f1p2/4977,i2_LQ_Rweevil_c64540/f1p5/2820,i1_HQ_Rweevil_c37687/f25p0/1373,i2_LQ_Rweevil_c108641/f1p22/2954,i1_HQ_Rweevil_c121140/f49p0/1116,i1_LQ_Rweevil_c34927/f1p56/1047,i3_LQ_Rweevil_c15089/f1p1/3036,i3_LQ_Rweevil_c28594/f1…
GO:0008134	transcription factor binding	molecular_function	0.35458	1	40	3203	323	27707	18	i3_LQ_Rweevil_c6953/f1p0/3151,i2_LQ_Rweevil_c155015/f1p6/2694,i3_LQ_Rweevil_c24250/f1p0/3313,i1_LQ_Rweevil_c50155/f1p1/1754,i3_LQ_Rweevil_c4988/f1p0/3263,i4_HQ_Rweevil_c1560/f2p0/4348,i2_LQ_Rweevil_c87563/f1p3/2217,i4_LQ_Rweevil_c4177/f1p1/4420,i4_LQ_Rweevil_c8154/f1p0/4809,i2_LQ_Rweevil_c55224/f1p4/2604,i3_LQ_Rweevil_c8534/f1p5/3661,i3_LQ_Rweevil_c19706/f1p0/3069,i3_LQ_Rweevil_c13466/f1p25/3434,…	22	i2_LQ_Rweevil_c109206/f1p7/2679,i3_HQ_Rweevil_c29443/f3p0/3019,i2_LQ_Rweevil_c65535/f1p0/2358,i5_LQ_Rweevil_c4662/f1p0/5091,i2_HQ_Rweevil_c2548/f5p6/2424,i3_LQ_Rweevil_c43158/f1p0/3009,i4_LQ_Rweevil_c10470/f1p12/4553,i3_LQ_Rweevil_c5647/f1p0/3916,i2_LQ_Rweevil_c43263/f2p0/2838,i1_LQ_Rweevil_c43311/f1p0/1185,i2_HQ_Rweevil_c8791/f14p2/2392,i2_LQ_Rweevil_c104712/f1p2/2989,i3_HQ_Rweevil_c30208/f2p0/3…
GO:0016763	transferase activity, transferring pentosyl groups	molecular_function	0.35486	1	6	3203	42	27707	4	i2_LQ_Rweevil_c65195/f1p91/2849,i1_HQ_Rweevil_c2305/f3p11/1951,i3_LQ_Rweevil_c9319/f1p0/3980,i1_LQ_Rweevil_c6630/f1p0/1720	2	i1_LQ_Rweevil_c72514/f1p0/1296,i1_HQ_Rweevil_c13339/f3p12/1798
GO:0042578	phosphoric ester hydrolase activity	molecular_function	0.35596	1	68	3203	557	27707	36	i1_LQ_Rweevil_c9634/f1p0/1752,i7_LQ_Rweevil_c915/f1p0/7979,i2_LQ_Rweevil_c132431/f1p3/2516,i0_LQ_Rweevil_c52297/f1p0/776,i2_LQ_Rweevil_c38563/f1p5/2929,i3_HQ_Rweevil_c38018/f2p0/3034,i2_LQ_Rweevil_c113308/f1p1/2730,i2_LQ_Rweevil_c84177/f1p13/3126,i4_LQ_Rweevil_c9189/f1p0/4565,i2_LQ_Rweevil_c55643/f1p2/2466,i3_LQ_Rweevil_c23318/f1p0/3484,i3_HQ_Rweevil_c17946/f2p9/3378,i3_LQ_Rweevil_c4230/f1p0/3809…	32	i4_LQ_Rweevil_c12120/f1p0/4679,i1_HQ_Rweevil_c20870/f2p0/1270,i3_LQ_Rweevil_c9661/f1p0/3273,i3_LQ_Rweevil_c26890/f1p9/3508,i1_LQ_Rweevil_c4839/f1p2/1496,i2_HQ_Rweevil_c67531/f3p1/2106,i3_LQ_Rweevil_c36162/f1p0/3426,i3_LQ_Rweevil_c13532/f1p0/3124,i2_LQ_Rweevil_c59632/f1p5/2436,i1_LQ_Rweevil_c46531/f1p0/1730,i4_LQ_Rweevil_c9987/f1p0/4159,i5_LQ_Rweevil_c4273/f1p1/5359,i5_LQ_Rweevil_c4075/f1p5/5143,i…
GO:0009072	aromatic amino acid family metabolic process	biological_process	0.35694	1	7	3203	50	27707	5	i1_LQ_Rweevil_c6712/f1p0/1175,i4_LQ_Rweevil_c5997/f1p1/4781,i2_LQ_Rweevil_c25225/f1p8/2143,i1_LQ_Rweevil_c11458/f1p0/1570,i3_LQ_Rweevil_c6668/f1p0/3161	2	i0_LQ_Rweevil_c60066/f1p0/893,i2_LQ_Rweevil_c22765/f1p28/2229
GO:0007030	Golgi organization	biological_process	0.35738	1	14	3203	107	27707	8	i1_LQ_Rweevil_c30154/f1p0/1691,i8_LQ_Rweevil_c270/f1p0/8923,i1_LQ_Rweevil_c67077/f1p0/1989,i1_LQ_Rweevil_c4272/f2p0/1985,i1_LQ_Rweevil_c6852/f1p0/1890,i1_LQ_Rweevil_c50155/f1p1/1754,i2_LQ_Rweevil_c55224/f1p4/2604,i2_LQ_Rweevil_c36307/f1p17/2632	6	i1_HQ_Rweevil_c1232/f17p0/1930,i2_HQ_Rweevil_c139473/f2p8/2032,i2_LQ_Rweevil_c48317/f1p3/1991,i3_HQ_Rweevil_c31743/f11p0/3123,i4_LQ_Rweevil_c7317/f1p0/4820,i3_LQ_Rweevil_c5647/f1p0/3916
GO:0016628	oxidoreductase activity, acting on the CH-CH group of donors, NAD or NADP as acceptor	molecular_function	0.35741	1	8	3203	58	27707	4	i11_LQ_Rweevil_c18/f1p0/11715,i2_HQ_Rweevil_c36014/f4p25/2315,i4_LQ_Rweevil_c6697/f1p4/4491,i2_LQ_Rweevil_c104958/f1p10/2300	4	i3_LQ_Rweevil_c25589/f1p0/3141,i3_HQ_Rweevil_c1440/f7p0/3196,i1_LQ_Rweevil_c5140/f4p8/1500,i4_LQ_Rweevil_c7929/f1p12/4245
GO:0044215	other organism	cellular_component	0.35759	1	10	3203	74	27707	6	i3_LQ_Rweevil_c36026/f1p0/3465,i2_HQ_Rweevil_c147268/f2p3/2179,i2_HQ_Rweevil_c17297/f5p1/2857,i1_LQ_Rweevil_c58043/f1p1/1061,i2_LQ_Rweevil_c62224/f1p4/2652,i2_HQ_Rweevil_c60720/f3p2/2422	4	i2_LQ_Rweevil_c68975/f1p3/2004,i2_LQ_Rweevil_c60363/f1p0/2837,i2_HQ_Rweevil_c12721/f2p2/2666,i2_HQ_Rweevil_c118314/f2p1/2060
GO:0044216	other organism cell	cellular_component	0.35759	1	10	3203	74	27707	6	i2_HQ_Rweevil_c17297/f5p1/2857,i1_LQ_Rweevil_c58043/f1p1/1061,i2_LQ_Rweevil_c62224/f1p4/2652,i2_HQ_Rweevil_c60720/f3p2/2422,i3_LQ_Rweevil_c36026/f1p0/3465,i2_HQ_Rweevil_c147268/f2p3/2179	4	i2_HQ_Rweevil_c12721/f2p2/2666,i2_HQ_Rweevil_c118314/f2p1/2060,i2_LQ_Rweevil_c68975/f1p3/2004,i2_LQ_Rweevil_c60363/f1p0/2837
GO:0044217	other organism part	cellular_component	0.35759	1	10	3203	74	27707	6	i2_LQ_Rweevil_c62224/f1p4/2652,i2_HQ_Rweevil_c60720/f3p2/2422,i2_HQ_Rweevil_c17297/f5p1/2857,i1_LQ_Rweevil_c58043/f1p1/1061,i2_HQ_Rweevil_c147268/f2p3/2179,i3_LQ_Rweevil_c36026/f1p0/3465	4	i2_HQ_Rweevil_c118314/f2p1/2060,i2_HQ_Rweevil_c12721/f2p2/2666,i2_LQ_Rweevil_c60363/f1p0/2837,i2_LQ_Rweevil_c68975/f1p3/2004
GO:0016661	oxidoreductase activity, acting on other nitrogenous compounds as donors	molecular_function	0.35856	1	2	3203	10	27707	2	i2_LQ_Rweevil_c39535/f1p25/2911,i2_LQ_Rweevil_c27403/f1p26/3017	0
GO:0098809	nitrite reductase activity	molecular_function	0.35856	1	2	3203	10	27707	2	i2_LQ_Rweevil_c27403/f1p26/3017,i2_LQ_Rweevil_c39535/f1p25/2911	0
GO:0005816	spindle pole body	cellular_component	0.35967	1	4	3203	26	27707	1	i1_LQ_Rweevil_c53573/f1p0/1907	3	i4_HQ_Rweevil_c877/f7p0/4503,i4_HQ_Rweevil_c1117/f4p0/4280,i2_HQ_Rweevil_c73812/f71p8/2921
GO:0005823	central plaque of spindle pole body	cellular_component	0.35967	1	4	3203	26	27707	1	i1_LQ_Rweevil_c53573/f1p0/1907	3	i4_HQ_Rweevil_c1117/f4p0/4280,i2_HQ_Rweevil_c73812/f71p8/2921,i4_HQ_Rweevil_c877/f7p0/4503
GO:0044450	microtubule organizing center part	cellular_component	0.35967	1	4	3203	26	27707	1	i1_LQ_Rweevil_c53573/f1p0/1907	3	i4_HQ_Rweevil_c877/f7p0/4503,i4_HQ_Rweevil_c1117/f4p0/4280,i2_HQ_Rweevil_c73812/f71p8/2921
GO:0009605	response to external stimulus	biological_process	0.36037	1	32	3203	260	27707	17	i2_LQ_Rweevil_c36307/f1p17/2632,i4_LQ_Rweevil_c11169/f1p53/4817,i1_LQ_Rweevil_c67077/f1p0/1989,i1_LQ_Rweevil_c30154/f1p0/1691,i2_LQ_Rweevil_c55603/f1p2/2956,i2_LQ_Rweevil_c113912/f1p0/2361,i5_HQ_Rweevil_c558/f2p0/5401,i1_LQ_Rweevil_c4940/f1p0/1795,i2_LQ_Rweevil_c7760/f1p3/2499,i1_HQ_Rweevil_c120417/f2p0/1258,i5_LQ_Rweevil_c1162/f1p0/5267,i2_LQ_Rweevil_c6147/f1p3/2880,i2_HQ_Rweevil_c128926/f2p4/25…	15	i0_LQ_Rweevil_c56772/f1p0/955,i3_HQ_Rweevil_c1555/f5p0/3139,i1_LQ_Rweevil_c28081/f1p0/1942,i2_LQ_Rweevil_c54741/f1p0/2711,i2_LQ_Rweevil_c87508/f1p0/2164,i2_HQ_Rweevil_c11146/f2p0/2776,i3_HQ_Rweevil_c7963/f5p7/3143,i2_LQ_Rweevil_c6590/f1p2/2554,i2_LQ_Rweevil_c106904/f1p31/3031,i2_HQ_Rweevil_c139473/f2p8/2032,i2_HQ_Rweevil_c1571/f9p32/2954,i4_LQ_Rweevil_c7155/f1p0/4814,i2_HQ_Rweevil_c147752/f24p21/…
GO:0005758	mitochondrial intermembrane space	cellular_component	0.36067	1	1	3203	4	27707	1	i0_HQ_Rweevil_c5019/f3p0/441	0
GO:0016530	metallochaperone activity	molecular_function	0.36067	1	1	3203	4	27707	1	i0_HQ_Rweevil_c5019/f3p0/441	0
GO:0016531	copper chaperone activity	molecular_function	0.36067	1	1	3203	4	27707	1	i0_HQ_Rweevil_c5019/f3p0/441	0
GO:0031970	organelle envelope lumen	cellular_component	0.36067	1	1	3203	4	27707	1	i0_HQ_Rweevil_c5019/f3p0/441	0
GO:0022412	cellular process involved in reproduction in multicellular organism	biological_process	0.36093	1	2	3203	11	27707	1	i0_LQ_Rweevil_c57882/f1p0/563	1	i5_LQ_Rweevil_c1020/f1p0/5164
GO:0004097	catechol oxidase activity	molecular_function	0.36129	1	1	3203	4	27707	1	i1_LQ_Rweevil_c16721/f1p0/1133	0
GO:0016682	oxidoreductase activity, acting on diphenols and related substances as donors, oxygen as acceptor	molecular_function	0.36129	1	1	3203	4	27707	1	i1_LQ_Rweevil_c16721/f1p0/1133	0
GO:0048731	system development	biological_process	0.36152	1	7	3203	51	27707	3	i5_LQ_Rweevil_c1531/f1p3/5630,i4_LQ_Rweevil_c6428/f1p4/4685,i3_LQ_Rweevil_c12265/f1p37/3295	4	i4_LQ_Rweevil_c13321/f1p11/4042,i1_LQ_Rweevil_c28081/f1p0/1942,i4_LQ_Rweevil_c7155/f1p0/4814,i2_LQ_Rweevil_c54741/f1p0/2711
GO:0006914	autophagy	biological_process	0.36347	1	56	3203	459	27707	30	i3_LQ_Rweevil_c26421/f1p0/3357,i2_HQ_Rweevil_c79972/f2p3/3278,i1_LQ_Rweevil_c67077/f1p0/1989,i1_LQ_Rweevil_c30154/f1p0/1691,i8_LQ_Rweevil_c270/f1p0/8923,i3_LQ_Rweevil_c21758/f1p0/3789,i1_LQ_Rweevil_c71593/f1p0/1725,i1_LQ_Rweevil_c48518/f1p0/1916,i3_LQ_Rweevil_c8534/f1p5/3661,i3_HQ_Rweevil_c19173/f2p0/3599,i2_LQ_Rweevil_c36307/f1p17/2632,i11_LQ_Rweevil_c27/f1p0/11096,i2_LQ_Rweevil_c55224/f1p4/2604…	26	i3_LQ_Rweevil_c12587/f1p0/3810,i2_LQ_Rweevil_c31521/f1p17/2037,i2_HQ_Rweevil_c54191/f2p7/2434,i3_HQ_Rweevil_c1882/f5p0/3217,i5_HQ_Rweevil_c248/f5p0/5547,i3_HQ_Rweevil_c31743/f11p0/3123,i2_HQ_Rweevil_c39443/f3p1/2326,i0_LQ_Rweevil_c56772/f1p0/955,i3_LQ_Rweevil_c34705/f1p0/3181,i5_LQ_Rweevil_c2105/f1p0/5117,i2_LQ_Rweevil_c57578/f1p1/2936,i5_LQ_Rweevil_c1440/f1p0/5677,i3_LQ_Rweevil_c5647/f1p0/3916,i…
GO:0098798	mitochondrial protein complex	cellular_component	0.36348	1	19	3203	152	27707	9	i2_HQ_Rweevil_c78235/f2p2/2278,i2_LQ_Rweevil_c42813/f1p13/3584,i0_LQ_Rweevil_c3572/f1p0/757,i1_LQ_Rweevil_c34353/f1p0/1023,i0_HQ_Rweevil_c1230/f6p0/455,i2_LQ_Rweevil_c113912/f1p0/2361,i3_HQ_Rweevil_c17573/f2p2/3639,i4_LQ_Rweevil_c11169/f1p53/4817,i6_LQ_Rweevil_c825/f1p16/6429	10	i2_HQ_Rweevil_c73812/f71p8/2921,i6_LQ_Rweevil_c2231/f1p0/6028,i6_LQ_Rweevil_c2349/f1p2/6015,i3_LQ_Rweevil_c28594/f1p0/3183,i3_LQ_Rweevil_c15089/f1p1/3036,i2_LQ_Rweevil_c87523/f1p5/2582,i1_LQ_Rweevil_c34927/f1p56/1047,i2_LQ_Rweevil_c108641/f1p22/2954,i1_HQ_Rweevil_c121140/f49p0/1116,i4_LQ_Rweevil_c2651/f1p2/4977
GO:0005102	receptor binding	molecular_function	0.3644	1	61	3203	502	27707	29	i1_LQ_Rweevil_c30154/f1p0/1691,i2_HQ_Rweevil_c6338/f2p14/2714,i1_LQ_Rweevil_c53159/f1p0/1654,i2_LQ_Rweevil_c37529/f1p10/2370,i1_LQ_Rweevil_c67077/f1p0/1989,i3_LQ_Rweevil_c21758/f1p0/3789,i2_LQ_Rweevil_c30135/f1p3/2050,i3_LQ_Rweevil_c28239/f1p0/3371,i2_LQ_Rweevil_c36307/f1p17/2632,i3_LQ_Rweevil_c8534/f1p5/3661,i1_LQ_Rweevil_c71593/f1p0/1725,i2_HQ_Rweevil_c5178/f3p2/2580,i2_LQ_Rweevil_c70111/f1p1/2…	32	i1_LQ_Rweevil_c146834/f1p0/1017,i2_LQ_Rweevil_c84779/f1p14/2891,i2_LQ_Rweevil_c49935/f1p21/2122,i2_HQ_Rweevil_c41479/f2p4/2876,i2_LQ_Rweevil_c61519/f1p0/2169,i1_HQ_Rweevil_c1101/f24p0/1812,i1_LQ_Rweevil_c43311/f1p0/1185,i3_HQ_Rweevil_c1520/f5p5/3162,i2_LQ_Rweevil_c58118/f1p0/2812,i3_LQ_Rweevil_c34705/f1p0/3181,i0_LQ_Rweevil_c23030/f1p401/816,i5_LQ_Rweevil_c2105/f1p0/5117,i1_LQ_Rweevil_c41478/f1p2…
GO:0007409	axonogenesis	biological_process	0.36462	1	4	3203	27	27707	1	i4_LQ_Rweevil_c6428/f1p4/4685	3	i1_LQ_Rweevil_c28081/f1p0/1942,i2_LQ_Rweevil_c54741/f1p0/2711,i4_LQ_Rweevil_c7155/f1p0/4814
GO:0007411	axon guidance	biological_process	0.36462	1	4	3203	27	27707	1	i4_LQ_Rweevil_c6428/f1p4/4685	3	i2_LQ_Rweevil_c54741/f1p0/2711,i4_LQ_Rweevil_c7155/f1p0/4814,i1_LQ_Rweevil_c28081/f1p0/1942
GO:0048667	cell morphogenesis involved in neuron differentiation	biological_process	0.36462	1	4	3203	27	27707	1	i4_LQ_Rweevil_c6428/f1p4/4685	3	i4_LQ_Rweevil_c7155/f1p0/4814,i2_LQ_Rweevil_c54741/f1p0/2711,i1_LQ_Rweevil_c28081/f1p0/1942
GO:0048812	neuron projection morphogenesis	biological_process	0.36462	1	4	3203	27	27707	1	i4_LQ_Rweevil_c6428/f1p4/4685	3	i4_LQ_Rweevil_c7155/f1p0/4814,i2_LQ_Rweevil_c54741/f1p0/2711,i1_LQ_Rweevil_c28081/f1p0/1942
GO:0061564	axon development	biological_process	0.36462	1	4	3203	27	27707	1	i4_LQ_Rweevil_c6428/f1p4/4685	3	i2_LQ_Rweevil_c54741/f1p0/2711,i4_LQ_Rweevil_c7155/f1p0/4814,i1_LQ_Rweevil_c28081/f1p0/1942
GO:0097485	neuron projection guidance	biological_process	0.36462	1	4	3203	27	27707	1	i4_LQ_Rweevil_c6428/f1p4/4685	3	i2_LQ_Rweevil_c54741/f1p0/2711,i4_LQ_Rweevil_c7155/f1p0/4814,i1_LQ_Rweevil_c28081/f1p0/1942
GO:0045454	cell redox homeostasis	biological_process	0.36556	1	14	3203	109	27707	4	i4_HQ_Rweevil_c14498/f5p0/4424,i1_LQ_Rweevil_c52948/f1p0/1812,i4_LQ_Rweevil_c2593/f1p65/4379,i4_HQ_Rweevil_c1343/f3p0/4493	10	i1_LQ_Rweevil_c74253/f1p0/1813,i0_LQ_Rweevil_c880/f12p0/931,i2_LQ_Rweevil_c19269/f1p15/2936,i1_HQ_Rweevil_c790/f16p0/1607,i1_LQ_Rweevil_c56064/f3p2/1035,i1_LQ_Rweevil_c147953/f1p13/1002,i1_LQ_Rweevil_c25468/f1p0/1970,i2_HQ_Rweevil_c139139/f3p18/2108,i2_LQ_Rweevil_c77272/f1p3/2480,i2_LQ_Rweevil_c119152/f1p16/1930
GO:0007031	peroxisome organization	biological_process	0.36724	1	6	3203	43	27707	1	i2_LQ_Rweevil_c108705/f1p2/2381	5	i2_LQ_Rweevil_c116774/f1p1/2668,i2_LQ_Rweevil_c22287/f1p4/2889,i2_LQ_Rweevil_c85150/f1p6/2680,i2_LQ_Rweevil_c23450/f1p5/2669,i2_LQ_Rweevil_c82722/f1p0/2507
GO:0004814	arginine-tRNA ligase activity	molecular_function	0.36731	1	2	3203	11	27707	0		2	i2_LQ_Rweevil_c19198/f1p4/2328,i2_HQ_Rweevil_c15510/f33p4/2194
GO:0006420	arginyl-tRNA aminoacylation	biological_process	0.36731	1	2	3203	11	27707	0		2	i2_LQ_Rweevil_c19198/f1p4/2328,i2_HQ_Rweevil_c15510/f33p4/2194
GO:0004827	proline-tRNA ligase activity	molecular_function	0.36804	1	2	3203	11	27707	1	i5_LQ_Rweevil_c5205/f1p0/5029	1	i0_LQ_Rweevil_c22873/f1p0/943
GO:0006433	prolyl-tRNA aminoacylation	biological_process	0.36804	1	2	3203	11	27707	1	i5_LQ_Rweevil_c5205/f1p0/5029	1	i0_LQ_Rweevil_c22873/f1p0/943
GO:0035240	dopamine binding	molecular_function	0.36858	1	2	3203	11	27707	0		2	i1_LQ_Rweevil_c68499/f1p0/1678,i2_LQ_Rweevil_c50632/f1p3/2179
GO:0070405	ammonium ion binding	molecular_function	0.36858	1	2	3203	11	27707	0		2	i2_LQ_Rweevil_c50632/f1p3/2179,i1_LQ_Rweevil_c68499/f1p0/1678
GO:0072544	L-DOPA binding	molecular_function	0.36858	1	2	3203	11	27707	0		2	i1_LQ_Rweevil_c68499/f1p0/1678,i2_LQ_Rweevil_c50632/f1p3/2179
GO:0072545	tyrosine binding	molecular_function	0.36858	1	2	3203	11	27707	0		2	i2_LQ_Rweevil_c50632/f1p3/2179,i1_LQ_Rweevil_c68499/f1p0/1678
GO:1901338	catecholamine binding	molecular_function	0.36858	1	2	3203	11	27707	0		2	i2_LQ_Rweevil_c50632/f1p3/2179,i1_LQ_Rweevil_c68499/f1p0/1678
GO:0031515	tRNA (m1A) methyltransferase complex	cellular_component	0.36894	1	2	3203	11	27707	2	i6_LQ_Rweevil_c1386/f1p2/6873,i2_HQ_Rweevil_c21403/f3p2/2662	0
GO:0034708	methyltransferase complex	cellular_component	0.36894	1	2	3203	11	27707	2	i6_LQ_Rweevil_c1386/f1p2/6873,i2_HQ_Rweevil_c21403/f3p2/2662	0
GO:0043527	tRNA methyltransferase complex	cellular_component	0.36894	1	2	3203	11	27707	2	i2_HQ_Rweevil_c21403/f3p2/2662,i6_LQ_Rweevil_c1386/f1p2/6873	0
GO:0007052	mitotic spindle organization	biological_process	0.36956	1	2	3203	11	27707	1	i3_LQ_Rweevil_c39396/f1p0/3083	1	i1_HQ_Rweevil_c1101/f24p0/1812
GO:0048278	vesicle docking	biological_process	0.36959	1	11	3203	83	27707	4	i1_LQ_Rweevil_c11288/f1p0/1630,i2_LQ_Rweevil_c82033/f1p1/2682,i3_LQ_Rweevil_c20553/f1p0/3560,i2_LQ_Rweevil_c108130/f1p1/2532	7	i1_LQ_Rweevil_c52851/f1p0/1925,i2_LQ_Rweevil_c5957/f1p1/2558,i2_LQ_Rweevil_c80275/f1p2/2521,i2_HQ_Rweevil_c76145/f6p4/2553,i2_HQ_Rweevil_c126113/f13p1/2521,i2_LQ_Rweevil_c41149/f1p2/2161,i2_LQ_Rweevil_c41618/f1p2/2256
GO:0031514	motile cilium	cellular_component	0.37034	1	21	3203	166	27707	17	i1_LQ_Rweevil_c67077/f1p0/1989,i3_LQ_Rweevil_c33521/f1p0/3649,i3_LQ_Rweevil_c5680/f1p0/3407,i4_HQ_Rweevil_c1899/f2p3/4252,i3_LQ_Rweevil_c4988/f1p0/3263,i2_LQ_Rweevil_c44150/f1p10/2302,i1_LQ_Rweevil_c50155/f1p1/1754,i1_HQ_Rweevil_c43819/f2p0/1587,i2_LQ_Rweevil_c38382/f1p2/2169,i3_LQ_Rweevil_c7714/f1p0/3374,i6_LQ_Rweevil_c1792/f1p0/6564,i2_LQ_Rweevil_c7761/f1p1/2921,i1_LQ_Rweevil_c48518/f1p0/1916,i…	4	i1_HQ_Rweevil_c1232/f17p0/1930,i2_LQ_Rweevil_c31521/f1p17/2037,i2_LQ_Rweevil_c48317/f1p3/1991,i3_LQ_Rweevil_c42008/f1p39/3589
GO:0007610	behavior	biological_process	0.37042	1	2	3203	11	27707	1	i1_LQ_Rweevil_c4940/f1p0/1795	1	i2_HQ_Rweevil_c147752/f24p21/2935
GO:0006954	inflammatory response	biological_process	0.371	1	2	3203	11	27707	0		2	i3_LQ_Rweevil_c22820/f1p0/3096,i2_LQ_Rweevil_c12527/f1p0/2142
GO:0004713	protein tyrosine kinase activity	molecular_function	0.37104	1	5	3203	34	27707	1	i3_LQ_Rweevil_c17981/f1p0/3426	4	i5_LQ_Rweevil_c4840/f1p0/5026,i5_LQ_Rweevil_c3840/f1p0/5104,i5_LQ_Rweevil_c4273/f1p1/5359,i4_LQ_Rweevil_c9518/f1p0/4565
GO:0009166	nucleotide catabolic process	biological_process	0.3713	1	2	3203	11	27707	1	i2_LQ_Rweevil_c86368/f1p0/2191	1	i2_LQ_Rweevil_c23856/f1p0/2512
GO:0005664	nuclear origin of replication recognition complex	cellular_component	0.37231	1	3	3203	19	27707	3	i2_LQ_Rweevil_c36307/f1p17/2632,i1_LQ_Rweevil_c30154/f1p0/1691,i1_LQ_Rweevil_c6852/f1p0/1890	0
GO:0005615	extracellular space	cellular_component	0.37243	1	41	3203	334	27707	26	i5_LQ_Rweevil_c1162/f1p0/5267,i2_LQ_Rweevil_c40116/f1p12/2310,i5_LQ_Rweevil_c1281/f1p0/5711,i2_LQ_Rweevil_c19251/f1p2/2262,i2_LQ_Rweevil_c48679/f1p0/2062,i1_LQ_Rweevil_c6852/f1p0/1890,i1_LQ_Rweevil_c50155/f1p1/1754,i2_LQ_Rweevil_c10446/f1p1/2544,i0_LQ_Rweevil_c52297/f1p0/776,i2_LQ_Rweevil_c135861/f1p90/2653,i3_LQ_Rweevil_c26794/f1p0/3120,i2_LQ_Rweevil_c135408/f1p7/2494,i3_LQ_Rweevil_c21758/f1p0/3…	15	i3_LQ_Rweevil_c24226/f1p0/3352,i2_LQ_Rweevil_c115091/f1p20/2356,i2_HQ_Rweevil_c1904/f10p3/2685,i2_LQ_Rweevil_c95933/f1p3/2119,i3_LQ_Rweevil_c5647/f1p0/3916,i2_LQ_Rweevil_c12527/f1p0/2142,i2_LQ_Rweevil_c10452/f1p19/2684,i2_LQ_Rweevil_c3153/f1p20/2545,i1_LQ_Rweevil_c42845/f1p0/1173,i2_HQ_Rweevil_c54191/f2p7/2434,i1_HQ_Rweevil_c1101/f24p0/1812,i3_LQ_Rweevil_c12587/f1p0/3810,i5_LQ_Rweevil_c2105/f1p0/…
GO:0003774	motor activity	molecular_function	0.3734	1	44	3203	357	27707	27	i2_LQ_Rweevil_c48973/f1p10/2103,i2_LQ_Rweevil_c123785/f1p119/1867,i2_LQ_Rweevil_c44232/f1p150/2723,i3_LQ_Rweevil_c34446/f1p2/3132,i6_LQ_Rweevil_c412/f1p7/6586,i2_LQ_Rweevil_c135408/f1p7/2494,i5_LQ_Rweevil_c1162/f1p0/5267,i5_LQ_Rweevil_c1281/f1p0/5711,i2_LQ_Rweevil_c8029/f1p66/2558,i3_LQ_Rweevil_c12702/f1p0/3834,i1_LQ_Rweevil_c67604/f1p0/1751,i2_LQ_Rweevil_c19251/f1p2/2262,i1_LQ_Rweevil_c6852/f1p0…	17	i4_LQ_Rweevil_c14251/f1p10/4244,i2_LQ_Rweevil_c3153/f1p20/2545,i2_HQ_Rweevil_c147752/f24p21/2935,i3_LQ_Rweevil_c11458/f1p0/3726,i3_LQ_Rweevil_c24226/f1p0/3352,i3_LQ_Rweevil_c5759/f1p60/3857,i7_LQ_Rweevil_c755/f1p0/7209,i3_LQ_Rweevil_c9525/f1p0/3755,i6_LQ_Rweevil_c939/f1p0/6709,i3_HQ_Rweevil_c17415/f2p0/3076,i3_LQ_Rweevil_c18218/f1p0/3069,i3_HQ_Rweevil_c38091/f2p0/2993,i6_LQ_Rweevil_c571/f1p0/6118…
GO:0009306	protein secretion	biological_process	0.37391	1	8	3203	59	27707	1	i7_LQ_Rweevil_c95/f1p0/7769	7	i2_HQ_Rweevil_c139139/f3p18/2108,i2_LQ_Rweevil_c119152/f1p16/1930,i2_LQ_Rweevil_c6590/f1p2/2554,i2_HQ_Rweevil_c17355/f4p2/2789,i4_LQ_Rweevil_c7155/f1p0/4814,i1_LQ_Rweevil_c52567/f1p0/1507,i2_HQ_Rweevil_c74051/f16p4/2152
GO:0005789	endoplasmic reticulum membrane	cellular_component	0.37495	1	21	3203	169	27707	9	i2_LQ_Rweevil_c57464/f1p25/2964,i2_HQ_Rweevil_c147837/f3p5/2250,i2_LQ_Rweevil_c88404/f1p2/2427,i5_LQ_Rweevil_c4622/f1p0/5571,i3_LQ_Rweevil_c6096/f1p0/3463,i7_LQ_Rweevil_c551/f1p0/7327,i2_LQ_Rweevil_c14795/f1p4/2163,i2_LQ_Rweevil_c86727/f1p3/2613,i5_LQ_Rweevil_c2078/f1p3/5390	12	i2_LQ_Rweevil_c62366/f1p0/2241,i1_LQ_Rweevil_c68097/f1p0/1836,i2_LQ_Rweevil_c132055/f1p4/2478,i0_LQ_Rweevil_c52386/f1p0/778,i2_HQ_Rweevil_c117871/f4p2/2084,i3_LQ_Rweevil_c12603/f1p0/3377,i2_LQ_Rweevil_c65535/f1p0/2358,i2_LQ_Rweevil_c52506/f42p0/2174,i2_LQ_Rweevil_c60986/f1p0/2940,i0_LQ_Rweevil_c13492/f1p23/683,i4_LQ_Rweevil_c12104/f1p4/4798,i1_HQ_Rweevil_c1955/f10p0/1286
GO:0046903	secretion	biological_process	0.37616	1	21	3203	167	27707	7	i0_LQ_Rweevil_c52297/f1p0/776,i2_LQ_Rweevil_c131809/f1p2/2679,i2_LQ_Rweevil_c108130/f1p1/2532,i7_LQ_Rweevil_c95/f1p0/7769,i2_LQ_Rweevil_c82033/f1p1/2682,i3_LQ_Rweevil_c20553/f1p0/3560,i1_LQ_Rweevil_c11288/f1p0/1630	14	i4_LQ_Rweevil_c7155/f1p0/4814,i2_LQ_Rweevil_c41618/f1p2/2256,i2_HQ_Rweevil_c76145/f6p4/2553,i2_HQ_Rweevil_c17355/f4p2/2789,i2_LQ_Rweevil_c6590/f1p2/2554,i2_LQ_Rweevil_c5957/f1p1/2558,i2_HQ_Rweevil_c139139/f3p18/2108,i2_LQ_Rweevil_c119152/f1p16/1930,i1_LQ_Rweevil_c52851/f1p0/1925,i1_LQ_Rweevil_c52567/f1p0/1507,i2_HQ_Rweevil_c74051/f16p4/2152,i2_LQ_Rweevil_c41149/f1p2/2161,i2_HQ_Rweevil_c126113/f13…
GO:0031967	organelle envelope	cellular_component	0.37626	1	41	3203	340	27707	21	i0_LQ_Rweevil_c3572/f1p0/757,i2_HQ_Rweevil_c78235/f2p2/2278,i2_LQ_Rweevil_c42813/f1p13/3584,i6_LQ_Rweevil_c825/f1p16/6429,i4_LQ_Rweevil_c11169/f1p53/4817,i2_LQ_Rweevil_c63101/f1p6/2132,i0_HQ_Rweevil_c1230/f6p0/455,i0_HQ_Rweevil_c5019/f3p0/441,i4_LQ_Rweevil_c12015/f1p0/4394,i4_LQ_Rweevil_c9253/f1p0/4360,i1_LQ_Rweevil_c22697/f1p0/1478,i3_HQ_Rweevil_c17573/f2p2/3639,i2_LQ_Rweevil_c110995/f1p2/2222,i…	20	i6_LQ_Rweevil_c2231/f1p0/6028,i2_LQ_Rweevil_c88973/f1p4/2732,i2_HQ_Rweevil_c73812/f71p8/2921,i3_HQ_Rweevil_c1882/f5p0/3217,i4_LQ_Rweevil_c10272/f1p0/4664,i2_LQ_Rweevil_c27295/f1p4/2730,i0_LQ_Rweevil_c50503/f1p0/803,i6_LQ_Rweevil_c2349/f1p2/6015,i2_HQ_Rweevil_c1904/f10p3/2685,i3_LQ_Rweevil_c9466/f1p3/3145,i5_HQ_Rweevil_c503/f2p0/5562,i1_HQ_Rweevil_c37687/f25p0/1373,i2_LQ_Rweevil_c64540/f1p5/2820,i…
GO:0008238	exopeptidase activity	molecular_function	0.37653	1	22	3203	175	27707	7	i2_LQ_Rweevil_c149921/f1p4/2491,i5_LQ_Rweevil_c1817/f1p2/5617,i2_HQ_Rweevil_c51476/f23p7/2214,i2_LQ_Rweevil_c10446/f1p1/2544,i2_LQ_Rweevil_c110995/f1p2/2222,i1_LQ_Rweevil_c59990/f1p12/1974,i1_HQ_Rweevil_c7099/f5p0/1390	15	i1_LQ_Rweevil_c77849/f1p1/1591,i2_HQ_Rweevil_c146589/f4p3/2576,i1_LQ_Rweevil_c13950/f2p0/1618,i2_LQ_Rweevil_c45069/f1p1/2538,i1_HQ_Rweevil_c2191/f8p7/1622,i1_LQ_Rweevil_c52819/f1p0/1881,i2_LQ_Rweevil_c132049/f1p7/2523,i2_HQ_Rweevil_c13155/f7p6/2368,i3_LQ_Rweevil_c22037/f1p0/3152,i0_LQ_Rweevil_c1872/f3p3/717,i2_HQ_Rweevil_c50782/f36p6/2498,i1_HQ_Rweevil_c17174/f15p1/1971,i1_HQ_Rweevil_c17184/f17p0…
GO:0016835	carbon-oxygen lyase activity	molecular_function	0.37898	1	8	3203	60	27707	6	i2_LQ_Rweevil_c15102/f1p0/2106,i1_LQ_Rweevil_c5955/f1p0/1950,i2_HQ_Rweevil_c22450/f2p3/2955,i1_LQ_Rweevil_c50237/f1p0/1712,i1_HQ_Rweevil_c9599/f3p1/1602,i2_LQ_Rweevil_c7072/f1p4/2784	2	i1_LQ_Rweevil_c5140/f4p8/1500,i3_LQ_Rweevil_c30177/f1p0/3049
GO:0070070	proton-transporting V-type ATPase complex assembly	biological_process	0.38	1	1	3203	4	27707	0		1	i1_LQ_Rweevil_c11277/f4p3/1950
GO:0070072	vacuolar proton-transporting V-type ATPase complex assembly	biological_process	0.38	1	1	3203	4	27707	0		1	i1_LQ_Rweevil_c11277/f4p3/1950
GO:0042721	mitochondrial inner membrane protein insertion complex	cellular_component	0.38307	1	1	3203	4	27707	0		1	i4_LQ_Rweevil_c2651/f1p2/4977
GO:0004514	nicotinate-nucleotide diphosphorylase (carboxylating) activity	molecular_function	0.38315	1	1	3203	4	27707	0		1	i1_HQ_Rweevil_c13339/f3p12/1798
GO:0009435	NAD biosynthetic process	biological_process	0.38315	1	1	3203	4	27707	0		1	i1_HQ_Rweevil_c13339/f3p12/1798
GO:0019674	NAD metabolic process	biological_process	0.38315	1	1	3203	4	27707	0		1	i1_HQ_Rweevil_c13339/f3p12/1798
GO:0007178	transmembrane receptor protein serine/threonine kinase signaling pathway	biological_process	0.38434	1	1	3203	4	27707	0		1	i1_LQ_Rweevil_c77191/f1p3/1206
GO:0007179	transforming growth factor beta receptor signaling pathway	biological_process	0.38434	1	1	3203	4	27707	0		1	i1_LQ_Rweevil_c77191/f1p3/1206
GO:0017015	regulation of transforming growth factor beta receptor signaling pathway	biological_process	0.38434	1	1	3203	4	27707	0		1	i1_LQ_Rweevil_c77191/f1p3/1206
GO:0030512	negative regulation of transforming growth factor beta receptor signaling pathway	biological_process	0.38434	1	1	3203	4	27707	0		1	i1_LQ_Rweevil_c77191/f1p3/1206
GO:0071559	response to transforming growth factor beta	biological_process	0.38434	1	1	3203	4	27707	0		1	i1_LQ_Rweevil_c77191/f1p3/1206
GO:0071560	cellular response to transforming growth factor beta stimulus	biological_process	0.38434	1	1	3203	4	27707	0		1	i1_LQ_Rweevil_c77191/f1p3/1206
GO:0090092	regulation of transmembrane receptor protein serine/threonine kinase signaling pathway	biological_process	0.38434	1	1	3203	4	27707	0		1	i1_LQ_Rweevil_c77191/f1p3/1206
GO:0090101	negative regulation of transmembrane receptor protein serine/threonine kinase signaling pathway	biological_process	0.38434	1	1	3203	4	27707	0		1	i1_LQ_Rweevil_c77191/f1p3/1206
GO:0090287	regulation of cellular response to growth factor stimulus	biological_process	0.38434	1	1	3203	4	27707	0		1	i1_LQ_Rweevil_c77191/f1p3/1206
GO:0090288	negative regulation of cellular response to growth factor stimulus	biological_process	0.38434	1	1	3203	4	27707	0		1	i1_LQ_Rweevil_c77191/f1p3/1206
GO:1903844	regulation of cellular response to transforming growth factor beta stimulus	biological_process	0.38434	1	1	3203	4	27707	0		1	i1_LQ_Rweevil_c77191/f1p3/1206
GO:1903845	negative regulation of cellular response to transforming growth factor beta stimulus	biological_process	0.38434	1	1	3203	4	27707	0		1	i1_LQ_Rweevil_c77191/f1p3/1206
GO:0009289	pilus	cellular_component	0.38482	1	1	3203	4	27707	0		1	i1_HQ_Rweevil_c84508/f5p0/1096
GO:0039526	modulation by virus of host apoptotic process	biological_process	0.38768	1	1	3203	4	27707	1	i2_HQ_Rweevil_c60720/f3p2/2422	0
GO:0044531	modulation of programmed cell death in other organism	biological_process	0.38768	1	1	3203	4	27707	1	i2_HQ_Rweevil_c60720/f3p2/2422	0
GO:0044532	modulation of apoptotic process in other organism	biological_process	0.38768	1	1	3203	4	27707	1	i2_HQ_Rweevil_c60720/f3p2/2422	0
[truncated: 1,750 more rows]

## Sheet: Pupa VS Male
Supplementary Table. S5: GO enrichment list of differential genes between Pupa and Male Adults
[truncated: 1,268 more rows]
